# Supplementary material for: The immune factors have complex causal regulation effects on inflammatory bowel disease
Source: Front Immunol. 2024 Jan 9;14:1322673. doi: 10.3389/fimmu.2023.1322673 (PMC10803565; doi:10.3389/fimmu.2023.1322673)
Supplement: Supplementary file 2 [file Table_2.xlsx]

## Sheet: Sheet1
Supplement Table S2: MR analysis of immune cell phenotypes on IBD in IBDGC dataset
Exposure	Outcome	Method	NSNP	β	SE	Pval	OR	LCI	UCI	Cochran’s Q	Cochran’s Q test P	Egger_intercept	P_intercept
IgD+ B cell %B cell || id:ebi-a-GCST90001391	Inflammatory bowel disease	Inverse variance weighted	8	0.0294923	0.0546485	0.589422	1.02993	0.925317	1.14637	5.81594	0.561398	0.00977041	0.805906
IgD+ B cell %B cell || id:ebi-a-GCST90001391	Inflammatory bowel disease	MR Egger	8	-0.0278733	0.229966	0.907485	0.972512	0.619646	1.52632	5.74999	0.451771	NA	NA
IgD+ B cell %B cell || id:ebi-a-GCST90001391	Inflammatory bowel disease	Weighted median	8	0.01589	0.0721553	0.8257	1.01602	0.882025	1.17036	NA	NA	NA	NA
IgD+ CD38+ B cell Absolute Count || id:ebi-a-GCST90001392	Inflammatory bowel disease	Inverse variance weighted	16	-0.0234791	0.0488273	0.630616	0.976794	0.887647	1.07489	24.1993	0.061786	-0.0199069	0.462952
IgD+ CD38+ B cell Absolute Count || id:ebi-a-GCST90001392	Inflammatory bowel disease	MR Egger	16	0.102193	0.173739	0.565767	1.1076	0.787939	1.55694	23.2533	0.0562709	NA	NA
IgD+ CD38+ B cell Absolute Count || id:ebi-a-GCST90001392	Inflammatory bowel disease	Weighted median	16	-0.0580969	0.0593673	0.327777	0.943558	0.839913	1.05999	NA	NA	NA	NA
IgD+ CD38dim B cell %B cell || id:ebi-a-GCST90001393	Inflammatory bowel disease	Inverse variance weighted	12	0.033566	0.0438485	0.443974	1.03414	0.948971	1.12694	7.6062	0.748085	-0.00421084	0.861101
IgD+ CD38dim B cell %B cell || id:ebi-a-GCST90001393	Inflammatory bowel disease	MR Egger	12	0.0629925	0.169665	0.718177	1.06502	0.763723	1.48518	7.57397	0.670373	NA	NA
IgD+ CD38dim B cell %B cell || id:ebi-a-GCST90001393	Inflammatory bowel disease	Weighted median	12	0.0433968	0.057535	0.450689	1.04435	0.93298	1.16902	NA	NA	NA	NA
IgD+ CD38dim B cell Absolute Count || id:ebi-a-GCST90001394	Inflammatory bowel disease	Inverse variance weighted	14	-0.150934	0.081829	0.0651092	0.859904	0.73248	1.0095	55.4047	3.43e-07	-0.0302618	0.532927
IgD+ CD38dim B cell Absolute Count || id:ebi-a-GCST90001394	Inflammatory bowel disease	MR Egger	14	0.0358162	0.30269	0.907767	1.03647	0.572664	1.8759	53.5648	3.27e-07	NA	NA
IgD+ CD38dim B cell Absolute Count || id:ebi-a-GCST90001394	Inflammatory bowel disease	Weighted median	14	-0.0877972	0.0593777	0.139241	0.915947	0.815318	1.029	NA	NA	NA	NA
IgD+ CD38- B cell %B cell || id:ebi-a-GCST90001395	Inflammatory bowel disease	Inverse variance weighted	12	-0.0664269	0.0464364	0.152576	0.935731	0.854326	1.02489	4.44769	0.954948	0.00180613	0.943717
IgD+ CD38- B cell %B cell || id:ebi-a-GCST90001395	Inflammatory bowel disease	MR Egger	12	-0.0784662	0.172668	0.659221	0.924533	0.65909	1.29688	4.44245	0.925188	NA	NA
IgD+ CD38- B cell %B cell || id:ebi-a-GCST90001395	Inflammatory bowel disease	Weighted median	12	-0.0603743	0.0615366	0.326537	0.941412	0.834447	1.06209	NA	NA	NA	NA
IgD+ CD38- B cell Absolute Count || id:ebi-a-GCST90001396	Inflammatory bowel disease	Inverse variance weighted	11	-0.0694874	0.0437268	0.112032	0.932872	0.856251	1.01635	10.1848	0.424436	-0.0217647	0.352254
IgD+ CD38- B cell Absolute Count || id:ebi-a-GCST90001396	Inflammatory bowel disease	MR Egger	11	0.0587989	0.137922	0.679889	1.06056	0.809347	1.38975	9.20102	0.418929	NA	NA
IgD+ CD38- B cell Absolute Count || id:ebi-a-GCST90001396	Inflammatory bowel disease	Weighted median	11	-0.0473409	0.0622915	0.447261	0.953762	0.844144	1.07762	NA	NA	NA	NA
Unswitched memory B cell %B cell || id:ebi-a-GCST90001397	Inflammatory bowel disease	Inverse variance weighted	23	-0.0155728	0.0429636	0.717005	0.984548	0.905035	1.07105	37.1269	0.0229085	0.0246721	0.296235
Unswitched memory B cell %B cell || id:ebi-a-GCST90001397	Inflammatory bowel disease	MR Egger	23	-0.177	0.156663	0.271294	0.83778	0.616277	1.1389	35.2033	0.026818	NA	NA
Unswitched memory B cell %B cell || id:ebi-a-GCST90001397	Inflammatory bowel disease	Weighted median	23	-0.011283	0.046796	0.80947	0.98878	0.902124	1.08376	NA	NA	NA	NA
Unswitched memory B cell Absolute Count || id:ebi-a-GCST90001398	Inflammatory bowel disease	Inverse variance weighted	13	0.0517201	0.0615928	0.401071	1.05308	0.933325	1.1882	21.5449	0.0429488	0.0330393	0.264941
Unswitched memory B cell Absolute Count || id:ebi-a-GCST90001398	Inflammatory bowel disease	MR Egger	13	-0.142656	0.176239	0.435417	0.867052	0.613801	1.22479	19.1436	0.0585638	NA	NA
Unswitched memory B cell Absolute Count || id:ebi-a-GCST90001398	Inflammatory bowel disease	Weighted median	13	0.0501842	0.0681742	0.46166	1.05146	0.919949	1.20178	NA	NA	NA	NA
IgD- CD27- B cell %B cell || id:ebi-a-GCST90001399	Inflammatory bowel disease	Inverse variance weighted	12	-0.0974031	0.0671418	0.146862	0.90719	0.795328	1.03479	43.4381	9.11e-06	0.0380916	0.176915
IgD- CD27- B cell %B cell || id:ebi-a-GCST90001399	Inflammatory bowel disease	MR Egger	12	-0.277638	0.139588	0.0747461	0.757571	0.576241	0.995962	35.8674	8.87e-05	NA	NA
IgD- CD27- B cell %B cell || id:ebi-a-GCST90001399	Inflammatory bowel disease	Weighted median	12	-0.178402	0.042841	3.12e-05	0.836606	0.769226	0.909888	NA	NA	NA	NA
IgD+ B cell Absolute Count || id:ebi-a-GCST90001400	Inflammatory bowel disease	Inverse variance weighted	11	-0.0934559	0.0900319	0.299256	0.910778	0.763442	1.08655	53.3272	6.47e-08	-0.0317909	0.53624
IgD+ B cell Absolute Count || id:ebi-a-GCST90001400	Inflammatory bowel disease	MR Egger	11	0.0806823	0.286265	0.784436	1.08403	0.618538	1.89983	50.9848	7.03e-08	NA	NA
IgD+ B cell Absolute Count || id:ebi-a-GCST90001400	Inflammatory bowel disease	Weighted median	11	0.000859684	0.055029	0.987536	1.00086	0.898528	1.11485	NA	NA	NA	NA
IgD- CD27- B cell Absolute Count || id:ebi-a-GCST90001401	Inflammatory bowel disease	Inverse variance weighted	22	-0.0639256	0.0446803	0.152507	0.938075	0.859419	1.02393	40.5565	0.00635892	-0.0179174	0.458411
IgD- CD27- B cell Absolute Count || id:ebi-a-GCST90001401	Inflammatory bowel disease	MR Egger	22	0.0310367	0.133464	0.818475	1.03152	0.794095	1.33994	39.4295	0.00589327	NA	NA
IgD- CD27- B cell Absolute Count || id:ebi-a-GCST90001401	Inflammatory bowel disease	Weighted median	22	-0.124962	0.0489395	0.0106679	0.882531	0.80181	0.971377	NA	NA	NA	NA
Switched memory B cell %B cell || id:ebi-a-GCST90001402	Inflammatory bowel disease	Inverse variance weighted	8	-0.00786723	0.0575725	0.891308	0.992164	0.886292	1.11068	8.02567	0.330336	-0.0691893	0.172091
Switched memory B cell %B cell || id:ebi-a-GCST90001402	Inflammatory bowel disease	MR Egger	8	0.481786	0.320425	0.183383	1.61896	0.863944	3.03381	5.62281	0.466739	NA	NA
Switched memory B cell %B cell || id:ebi-a-GCST90001402	Inflammatory bowel disease	Weighted median	8	-0.00862634	0.0723249	0.90506	0.991411	0.860378	1.1424	NA	NA	NA	NA
Switched memory B cell Absolute Count || id:ebi-a-GCST90001403	Inflammatory bowel disease	Inverse variance weighted	16	-0.00471495	0.0395931	0.905208	0.995296	0.920979	1.07561	15.5769	0.410713	-0.0614744	0.0429989
Switched memory B cell Absolute Count || id:ebi-a-GCST90001403	Inflammatory bowel disease	MR Egger	16	0.416306	0.193136	0.0490114	1.51635	1.03848	2.21411	10.6244	0.715254	NA	NA
Switched memory B cell Absolute Count || id:ebi-a-GCST90001403	Inflammatory bowel disease	Weighted median	16	0.000598132	0.0540295	0.991167	1.0006	0.900055	1.11237	NA	NA	NA	NA
Plasma Blast-Plasma Cell %B cell || id:ebi-a-GCST90001404	Inflammatory bowel disease	Inverse variance weighted	18	0.0523629	0.0534192	0.326974	1.05376	0.949007	1.17007	33.9165	0.00860685	0.0358344	0.262679
Plasma Blast-Plasma Cell %B cell || id:ebi-a-GCST90001404	Inflammatory bowel disease	MR Egger	18	-0.149624	0.181839	0.422695	0.861032	0.602886	1.22971	31.2813	0.0123851	NA	NA
Plasma Blast-Plasma Cell %B cell || id:ebi-a-GCST90001404	Inflammatory bowel disease	Weighted median	18	-0.013311	0.0569383	0.815157	0.986777	0.882576	1.10328	NA	NA	NA	NA
Plasma Blast-Plasma Cell Absolute Count || id:ebi-a-GCST90001405	Inflammatory bowel disease	Inverse variance weighted	14	0.0509181	0.0516005	0.323753	1.05224	0.951021	1.16422	16.0001	0.249127	0.0530635	0.048302
Plasma Blast-Plasma Cell Absolute Count || id:ebi-a-GCST90001405	Inflammatory bowel disease	MR Egger	14	-0.326168	0.177745	0.0913966	0.721684	0.509386	1.02246	11.1685	0.51454	NA	NA
Plasma Blast-Plasma Cell Absolute Count || id:ebi-a-GCST90001405	Inflammatory bowel disease	Weighted median	14	0.0175662	0.0628026	0.779704	1.01772	0.89985	1.15103	NA	NA	NA	NA
Memory B cell %B cell || id:ebi-a-GCST90001406	Inflammatory bowel disease	Inverse variance weighted	18	-0.0506894	0.0372694	0.173803	0.950574	0.883612	1.02261	19.9868	0.274906	-0.0236411	0.286293
Memory B cell %B cell || id:ebi-a-GCST90001406	Inflammatory bowel disease	MR Egger	18	0.0967355	0.13868	0.495476	1.10157	0.839391	1.44564	18.5741	0.291363	NA	NA
Memory B cell %B cell || id:ebi-a-GCST90001406	Inflammatory bowel disease	Weighted median	18	-0.0597246	0.0504893	0.236842	0.942024	0.853266	1.04001	NA	NA	NA	NA
Memory B cell Absolute Count || id:ebi-a-GCST90001407	Inflammatory bowel disease	Inverse variance weighted	10	0.00727468	0.0539881	0.892813	1.0073	0.906158	1.11973	10.5798	0.305616	0.0475108	0.0663957
Memory B cell Absolute Count || id:ebi-a-GCST90001407	Inflammatory bowel disease	MR Egger	10	-0.290478	0.148757	0.08663	0.747906	0.558757	1.00109	6.06779	0.639639	NA	NA
Memory B cell Absolute Count || id:ebi-a-GCST90001407	Inflammatory bowel disease	Weighted median	10	0.0591115	0.073235	0.419581	1.06089	0.919037	1.22465	NA	NA	NA	NA
Naive-mature B cell %B cell || id:ebi-a-GCST90001408	Inflammatory bowel disease	Inverse variance weighted	19	0.0380747	0.038253	0.319571	1.03881	0.963771	1.11969	23.3194	0.178612	0.0204906	0.351485
Naive-mature B cell %B cell || id:ebi-a-GCST90001408	Inflammatory bowel disease	MR Egger	19	-0.090084	0.139162	0.526062	0.913854	0.695697	1.20042	22.125	0.179961	NA	NA
Naive-mature B cell %B cell || id:ebi-a-GCST90001408	Inflammatory bowel disease	Weighted median	19	0.0371327	0.0492724	0.451077	1.03783	0.942291	1.14306	NA	NA	NA	NA
Naive-mature B cell Absolute Count || id:ebi-a-GCST90001409	Inflammatory bowel disease	Inverse variance weighted	19	-0.0931978	0.0674309	0.166934	0.911013	0.798227	1.03974	71.839	2.2e-08	-0.0375813	0.326062
Naive-mature B cell Absolute Count || id:ebi-a-GCST90001409	Inflammatory bowel disease	MR Egger	19	0.125994	0.226982	0.586068	1.13428	0.726956	1.76982	67.7626	5.22e-08	NA	NA
Naive-mature B cell Absolute Count || id:ebi-a-GCST90001409	Inflammatory bowel disease	Weighted median	19	0.0166091	0.0493636	0.73652	1.01675	0.922984	1.12004	NA	NA	NA	NA
IgD- CD38+ B cell %B cell || id:ebi-a-GCST90001410	Inflammatory bowel disease	Inverse variance weighted	11	0.0131902	0.0469122	0.778582	1.01328	0.924264	1.11086	8.38748	0.591044	0.00256126	0.918244
IgD- CD38+ B cell %B cell || id:ebi-a-GCST90001410	Inflammatory bowel disease	MR Egger	11	-0.00394117	0.168929	0.981896	0.996067	0.715308	1.38702	8.37634	0.49671	NA	NA
IgD- CD38+ B cell %B cell || id:ebi-a-GCST90001410	Inflammatory bowel disease	Weighted median	11	-0.0181363	0.0636434	0.775669	0.982027	0.86686	1.11249	NA	NA	NA	NA
IgD+ CD24+ B cell %B cell || id:ebi-a-GCST90001411	Inflammatory bowel disease	Inverse variance weighted	14	-0.0420007	0.0468217	0.3697	0.958869	0.87479	1.05103	13.2323	0.430031	-0.0373867	0.20237
IgD+ CD24+ B cell %B cell || id:ebi-a-GCST90001411	Inflammatory bowel disease	MR Egger	14	0.218619	0.198747	0.292916	1.24436	0.842884	1.83705	11.4136	0.493843	NA	NA
IgD+ CD24+ B cell %B cell || id:ebi-a-GCST90001411	Inflammatory bowel disease	Weighted median	14	-0.0261961	0.0640968	0.682763	0.974144	0.859138	1.10455	NA	NA	NA	NA
IgD+ CD24+ B cell Absolute Count || id:ebi-a-GCST90001412	Inflammatory bowel disease	Inverse variance weighted	19	0.00765484	0.0443939	0.863099	1.00768	0.92371	1.09929	25.5492	0.110521	-0.00638227	0.81029
IgD+ CD24+ B cell Absolute Count || id:ebi-a-GCST90001412	Inflammatory bowel disease	MR Egger	19	0.0482342	0.172567	0.783226	1.04942	0.748265	1.47177	25.4602	0.0848738	NA	NA
IgD+ CD24+ B cell Absolute Count || id:ebi-a-GCST90001412	Inflammatory bowel disease	Weighted median	19	0.0450268	0.0543509	0.407418	1.04606	0.940352	1.16364	NA	NA	NA	NA
IgD- CD24- B cell %B cell || id:ebi-a-GCST90001413	Inflammatory bowel disease	Inverse variance weighted	9	-0.0438545	0.0461034	0.341492	0.957093	0.8744	1.04761	6.21133	0.623573	-0.00487513	0.86635
IgD- CD24- B cell %B cell || id:ebi-a-GCST90001413	Inflammatory bowel disease	MR Egger	9	-0.0187417	0.151053	0.904744	0.981433	0.729931	1.31959	6.18085	0.518798	NA	NA
IgD- CD24- B cell %B cell || id:ebi-a-GCST90001413	Inflammatory bowel disease	Weighted median	9	-0.0161915	0.0597063	0.786249	0.983939	0.875276	1.10609	NA	NA	NA	NA
IgD- CD24- B cell Absolute Count || id:ebi-a-GCST90001414	Inflammatory bowel disease	Inverse variance weighted	13	0.00760382	0.0460017	0.868712	1.00763	0.920757	1.10271	9.92938	0.622156	0.00323266	0.915639
IgD- CD24- B cell Absolute Count || id:ebi-a-GCST90001414	Inflammatory bowel disease	MR Egger	13	-0.0110415	0.178068	0.951669	0.989019	0.697638	1.4021	9.91763	0.537811	NA	NA
IgD- CD24- B cell Absolute Count || id:ebi-a-GCST90001414	Inflammatory bowel disease	Weighted median	13	-0.013913	0.0584652	0.811904	0.986183	0.879409	1.10592	NA	NA	NA	NA
IgD+ CD24- B cell %B cell || id:ebi-a-GCST90001415	Inflammatory bowel disease	Inverse variance weighted	13	-0.0278817	0.0522984	0.593946	0.972503	0.877756	1.07748	17.1541	0.143892	0.00691848	0.823955
IgD+ CD24- B cell %B cell || id:ebi-a-GCST90001415	Inflammatory bowel disease	MR Egger	13	-0.0676183	0.182726	0.718369	0.934617	0.653273	1.33713	17.0735	0.10572	NA	NA
IgD+ CD24- B cell %B cell || id:ebi-a-GCST90001415	Inflammatory bowel disease	Weighted median	13	-0.028269	0.0633875	0.655619	0.972127	0.858552	1.10073	NA	NA	NA	NA
IgD+ CD24- B cell Absolute Count || id:ebi-a-GCST90001416	Inflammatory bowel disease	Inverse variance weighted	13	-0.136749	0.0870034	0.116004	0.872189	0.735447	1.03435	54.5336	2.19e-07	-0.0413523	0.416563
IgD+ CD24- B cell Absolute Count || id:ebi-a-GCST90001416	Inflammatory bowel disease	MR Egger	13	0.0962662	0.289741	0.745947	1.10105	0.623986	1.94286	51.2157	3.78e-07	NA	NA
IgD+ CD24- B cell Absolute Count || id:ebi-a-GCST90001416	Inflammatory bowel disease	Weighted median	13	0.0119877	0.0577355	0.835517	1.01206	0.903776	1.13332	NA	NA	NA	NA
CD24+ CD27+ B cell %B cell || id:ebi-a-GCST90001417	Inflammatory bowel disease	Inverse variance weighted	15	-0.000874725	0.0521256	0.986611	0.999126	0.90209	1.1066	21.9081	0.0805219	-0.0365789	0.215245
CD24+ CD27+ B cell %B cell || id:ebi-a-GCST90001417	Inflammatory bowel disease	MR Egger	15	0.213225	0.172031	0.237087	1.23766	0.883419	1.73396	19.3781	0.11184	NA	NA
CD24+ CD27+ B cell %B cell || id:ebi-a-GCST90001417	Inflammatory bowel disease	Weighted median	15	-0.0531987	0.0613597	0.385944	0.948192	0.840748	1.06937	NA	NA	NA	NA
CD24+ CD27+ B cell Absolute Count || id:ebi-a-GCST90001418	Inflammatory bowel disease	Inverse variance weighted	15	0.0480986	0.0430896	0.264318	1.04927	0.964296	1.14174	12.2466	0.586508	-0.00302585	0.896325
CD24+ CD27+ B cell Absolute Count || id:ebi-a-GCST90001418	Inflammatory bowel disease	MR Egger	15	0.0676047	0.152992	0.665834	1.06994	0.792741	1.44407	12.2289	0.508968	NA	NA
CD24+ CD27+ B cell Absolute Count || id:ebi-a-GCST90001418	Inflammatory bowel disease	Weighted median	15	0.0704834	0.0599936	0.240056	1.07303	0.953988	1.20692	NA	NA	NA	NA
CD20- B cell %B cell || id:ebi-a-GCST90001419	Inflammatory bowel disease	Inverse variance weighted	15	-0.109755	0.111441	0.32469	0.896054	0.720234	1.11479	117.882	1.63e-18	-0.0378203	0.552903
CD20- B cell %B cell || id:ebi-a-GCST90001419	Inflammatory bowel disease	MR Egger	15	0.0935628	0.352699	0.794956	1.09808	0.550061	2.19208	114.61	2.33e-18	NA	NA
CD20- B cell %B cell || id:ebi-a-GCST90001419	Inflammatory bowel disease	Weighted median	15	-0.0166023	0.0537984	0.757624	0.983535	0.885107	1.09291	NA	NA	NA	NA
IgD- CD38+ B cell Absolute Count || id:ebi-a-GCST90001420	Inflammatory bowel disease	Inverse variance weighted	10	-0.0145505	0.0516179	0.77803	0.985555	0.890723	1.09048	8.01706	0.532428	-0.0310687	0.328531
IgD- CD38+ B cell Absolute Count || id:ebi-a-GCST90001420	Inflammatory bowel disease	MR Egger	10	0.181613	0.195467	0.380007	1.19915	0.817501	1.75897	6.93443	0.543724	NA	NA
IgD- CD38+ B cell Absolute Count || id:ebi-a-GCST90001420	Inflammatory bowel disease	Weighted median	10	-0.0586608	0.0742549	0.429532	0.943027	0.815299	1.09076	NA	NA	NA	NA
CD20- B cell Absolute Count || id:ebi-a-GCST90001421	Inflammatory bowel disease	Inverse variance weighted	21	-0.0424514	0.0676774	0.530488	0.958437	0.839374	1.09439	74.508	3.29e-08	0.0462338	0.235016
CD20- B cell Absolute Count || id:ebi-a-GCST90001421	Inflammatory bowel disease	MR Egger	21	-0.356162	0.264379	0.193775	0.700359	0.417135	1.17588	69.0422	1.33e-07	NA	NA
CD20- B cell Absolute Count || id:ebi-a-GCST90001421	Inflammatory bowel disease	Weighted median	21	0.0481159	0.0528884	0.362947	1.04929	0.945969	1.1639	NA	NA	NA	NA
CD20- CD38- B cell %B cell || id:ebi-a-GCST90001422	Inflammatory bowel disease	Inverse variance weighted	19	-0.103651	0.0771457	0.179085	0.90154	0.775027	1.0487	81.7656	4.2e-10	0.103405	0.0186716
CD20- CD38- B cell %B cell || id:ebi-a-GCST90001422	Inflammatory bowel disease	MR Egger	19	-0.737388	0.252804	0.00961327	0.478362	0.291451	0.785141	58.4995	1.85e-06	NA	NA
CD20- CD38- B cell %B cell || id:ebi-a-GCST90001422	Inflammatory bowel disease	Weighted median	19	0.00414603	0.0535777	0.938319	1.00415	0.904054	1.11534	NA	NA	NA	NA
CD20- CD38- B cell Absolute Count || id:ebi-a-GCST90001423	Inflammatory bowel disease	Inverse variance weighted	15	-0.145429	0.0962573	0.130829	0.864651	0.715987	1.04418	75.5066	1.91e-10	0.117198	0.0541682
CD20- CD38- B cell Absolute Count || id:ebi-a-GCST90001423	Inflammatory bowel disease	MR Egger	15	-0.84836	0.343116	0.0280018	0.428116	0.218522	0.838742	56.1567	2.53e-07	NA	NA
CD20- CD38- B cell Absolute Count || id:ebi-a-GCST90001423	Inflammatory bowel disease	Weighted median	15	0.0108608	0.0627831	0.86266	1.01092	0.893871	1.1433	NA	NA	NA	NA
IgD+ B cell %Lymphocyte || id:ebi-a-GCST90001424	Inflammatory bowel disease	Inverse variance weighted	13	0.0100181	0.0623212	0.87229	1.01007	0.893927	1.1413	25.5198	0.0125428	0.014022	0.67217
IgD+ B cell %Lymphocyte || id:ebi-a-GCST90001424	Inflammatory bowel disease	MR Egger	13	-0.0741436	0.204073	0.723253	0.928538	0.622428	1.38519	25.0888	0.00884768	NA	NA
IgD+ B cell %Lymphocyte || id:ebi-a-GCST90001424	Inflammatory bowel disease	Weighted median	13	0.0152567	0.0638872	0.811255	1.01537	0.895868	1.15082	NA	NA	NA	NA
IgD- CD38+ B cell %lymphocyte || id:ebi-a-GCST90001425	Inflammatory bowel disease	Inverse variance weighted	16	0.00789193	0.0478632	0.869034	1.00792	0.917668	1.10706	20.1439	0.166482	-0.0195073	0.419608
IgD- CD38+ B cell %lymphocyte || id:ebi-a-GCST90001425	Inflammatory bowel disease	MR Egger	16	0.133631	0.158753	0.414072	1.14297	0.837341	1.56016	19.1957	0.157604	NA	NA
IgD- CD38+ B cell %lymphocyte || id:ebi-a-GCST90001425	Inflammatory bowel disease	Weighted median	16	0.0807955	0.0615367	0.189195	1.08415	0.960966	1.22312	NA	NA	NA	NA
IgD- CD38dim B cell %lymphocyte || id:ebi-a-GCST90001426	Inflammatory bowel disease	Inverse variance weighted	14	0.00752905	0.0457837	0.869378	1.00756	0.921081	1.10215	17.2213	0.189386	-0.0173113	0.586975
IgD- CD38dim B cell %lymphocyte || id:ebi-a-GCST90001426	Inflammatory bowel disease	MR Egger	14	0.127643	0.220266	0.572974	1.13615	0.737803	1.74956	16.7854	0.157849	NA	NA
IgD- CD38dim B cell %lymphocyte || id:ebi-a-GCST90001426	Inflammatory bowel disease	Weighted median	14	0.0458848	0.0546598	0.40121	1.04695	0.94059	1.16535	NA	NA	NA	NA
IgD- CD38- B cell %lymphocyte || id:ebi-a-GCST90001427	Inflammatory bowel disease	Inverse variance weighted	22	-0.00490034	0.0354072	0.889925	0.995112	0.928394	1.06662	20.4915	0.49035	0.0180856	0.466967
IgD- CD38- B cell %lymphocyte || id:ebi-a-GCST90001427	Inflammatory bowel disease	MR Egger	22	-0.133999	0.177652	0.459473	0.874591	0.617426	1.23887	19.9415	0.461591	NA	NA
IgD- CD38- B cell %lymphocyte || id:ebi-a-GCST90001427	Inflammatory bowel disease	Weighted median	22	0.031239	0.05264	0.552882	1.03173	0.930591	1.14387	NA	NA	NA	NA
IgD- CD38dim B cell %B cell || id:ebi-a-GCST90001428	Inflammatory bowel disease	Inverse variance weighted	15	0.0693899	0.0769355	0.367098	1.07185	0.921821	1.24631	47.563	1.55e-05	-0.0331855	0.395864
IgD- CD38dim B cell %B cell || id:ebi-a-GCST90001428	Inflammatory bowel disease	MR Egger	15	0.27602	0.247789	0.285479	1.31787	0.810872	2.14188	44.9002	2.17e-05	NA	NA
IgD- CD38dim B cell %B cell || id:ebi-a-GCST90001428	Inflammatory bowel disease	Weighted median	15	0.00655388	0.058584	0.910925	1.00658	0.897385	1.12905	NA	NA	NA	NA
IgD+ CD38+ B cell %lymphocyte || id:ebi-a-GCST90001429	Inflammatory bowel disease	Inverse variance weighted	17	-0.0433197	0.0689259	0.529678	0.957605	0.836596	1.09612	53.9171	5.35e-06	-0.0288429	0.514005
IgD+ CD38+ B cell %lymphocyte || id:ebi-a-GCST90001429	Inflammatory bowel disease	MR Egger	17	0.148039	0.294743	0.622775	1.15956	0.650731	2.06625	52.3575	4.93e-06	NA	NA
IgD+ CD38+ B cell %lymphocyte || id:ebi-a-GCST90001429	Inflammatory bowel disease	Weighted median	17	0.0429082	0.0600306	0.47475	1.04384	0.927974	1.17418	NA	NA	NA	NA
IgD+ CD38dim B cell %lymphocyte || id:ebi-a-GCST90001430	Inflammatory bowel disease	Inverse variance weighted	22	0.0029182	0.04393	0.947037	1.00292	0.920181	1.0931	36.1169	0.0212134	0.0451936	0.0838907
IgD+ CD38dim B cell %lymphocyte || id:ebi-a-GCST90001430	Inflammatory bowel disease	MR Egger	22	-0.288815	0.165698	0.0966858	0.749151	0.541407	1.03661	30.9891	0.0553341	NA	NA
IgD+ CD38dim B cell %lymphocyte || id:ebi-a-GCST90001430	Inflammatory bowel disease	Weighted median	22	0.04722	0.0494234	0.339367	1.04835	0.951562	1.15499	NA	NA	NA	NA
IgD+ CD38- B cell %lymphocyte || id:ebi-a-GCST90001431	Inflammatory bowel disease	Inverse variance weighted	12	0.0303252	0.0518034	0.558285	1.03079	0.931267	1.14095	12.9977	0.293478	0.0420672	0.217576
IgD+ CD38- B cell %lymphocyte || id:ebi-a-GCST90001431	Inflammatory bowel disease	MR Egger	12	-0.209427	0.188976	0.29371	0.811049	0.559999	1.17465	11.0792	0.35138	NA	NA
IgD+ CD38- B cell %lymphocyte || id:ebi-a-GCST90001431	Inflammatory bowel disease	Weighted median	12	0.0857337	0.0669942	0.200644	1.08952	0.955448	1.2424	NA	NA	NA	NA
Unswitched memory B cell %lymphocyte || id:ebi-a-GCST90001432	Inflammatory bowel disease	Inverse variance weighted	15	0.0419836	0.0513194	0.413309	1.04288	0.943082	1.15323	21.721	0.0845323	0.0208795	0.492526
Unswitched memory B cell %lymphocyte || id:ebi-a-GCST90001432	Inflammatory bowel disease	MR Egger	15	-0.0883827	0.191858	0.652649	0.91541	0.628497	1.3333	20.9185	0.0745568	NA	NA
Unswitched memory B cell %lymphocyte || id:ebi-a-GCST90001432	Inflammatory bowel disease	Weighted median	15	0.0282609	0.0601867	0.638673	1.02866	0.914201	1.15746	NA	NA	NA	NA
IgD- CD27- B cell %lymphocyte || id:ebi-a-GCST90001433	Inflammatory bowel disease	Inverse variance weighted	14	-0.113096	0.0441434	0.0104065	0.893065	0.819044	0.973775	22.442	0.0488811	-0.00988385	0.677833
IgD- CD27- B cell %lymphocyte || id:ebi-a-GCST90001433	Inflammatory bowel disease	MR Egger	14	-0.0650983	0.121614	0.602231	0.936975	0.738258	1.18918	22.108	0.0363269	NA	NA
IgD- CD27- B cell %lymphocyte || id:ebi-a-GCST90001433	Inflammatory bowel disease	Weighted median	14	-0.173145	0.0491663	0.00042893	0.841016	0.763753	0.926095	NA	NA	NA	NA
Switched memory B cell %lymphocyte || id:ebi-a-GCST90001434	Inflammatory bowel disease	Inverse variance weighted	13	0.0366115	0.0398143	0.357805	1.03729	0.959422	1.12148	9.01835	0.701363	-0.0293383	0.33359
Switched memory B cell %lymphocyte || id:ebi-a-GCST90001434	Inflammatory bowel disease	MR Egger	13	0.217661	0.183396	0.260292	1.24317	0.867799	1.7809	7.99557	0.713701	NA	NA
Switched memory B cell %lymphocyte || id:ebi-a-GCST90001434	Inflammatory bowel disease	Weighted median	13	0.0473068	0.0525513	0.368012	1.04844	0.945829	1.16219	NA	NA	NA	NA
Plasma Blast-Plasma Cell %lymphocyte || id:ebi-a-GCST90001435	Inflammatory bowel disease	Inverse variance weighted	13	0.108184	0.0743299	0.145541	1.11425	0.963192	1.28901	33.4901	0.000811347	-0.00116429	0.982227
Plasma Blast-Plasma Cell %lymphocyte || id:ebi-a-GCST90001435	Inflammatory bowel disease	MR Egger	13	0.115937	0.348918	0.745928	1.12292	0.56669	2.22513	33.4885	0.000438315	NA	NA
Plasma Blast-Plasma Cell %lymphocyte || id:ebi-a-GCST90001435	Inflammatory bowel disease	Weighted median	13	0.0219562	0.0732179	0.764272	1.0222	0.885546	1.17994	NA	NA	NA	NA
Memory B cell %lymphocyte || id:ebi-a-GCST90001436	Inflammatory bowel disease	Inverse variance weighted	19	0.0405008	0.0430374	0.346674	1.04133	0.957095	1.13298	25.9525	0.100849	-0.00802617	0.738229
Memory B cell %lymphocyte || id:ebi-a-GCST90001436	Inflammatory bowel disease	MR Egger	19	0.0928391	0.160261	0.569984	1.09729	0.801499	1.50223	25.7775	0.0786107	NA	NA
Memory B cell %lymphocyte || id:ebi-a-GCST90001436	Inflammatory bowel disease	Weighted median	19	0.0426133	0.0527291	0.419002	1.04353	0.941072	1.15715	NA	NA	NA	NA
Naive-mature B cell %lymphocyte || id:ebi-a-GCST90001437	Inflammatory bowel disease	Inverse variance weighted	17	-0.0710256	0.0424661	0.0944206	0.931438	0.85705	1.01228	17.6267	0.346207	0.0175258	0.394947
Naive-mature B cell %lymphocyte || id:ebi-a-GCST90001437	Inflammatory bowel disease	MR Egger	17	-0.173569	0.124655	0.184102	0.840659	0.658433	1.07332	16.7692	0.33285	NA	NA
Naive-mature B cell %lymphocyte || id:ebi-a-GCST90001437	Inflammatory bowel disease	Weighted median	17	-0.0636067	0.0562104	0.25781	0.938374	0.840482	1.04767	NA	NA	NA	NA
IgD- CD38dim B cell Absolute Count || id:ebi-a-GCST90001438	Inflammatory bowel disease	Inverse variance weighted	11	0.0320387	0.0504568	0.525446	1.03256	0.935329	1.13989	4.68605	0.91114	0.015396	0.745419
IgD- CD38dim B cell Absolute Count || id:ebi-a-GCST90001438	Inflammatory bowel disease	MR Egger	11	-0.0827292	0.34645	0.816616	0.9206	0.466839	1.81541	4.57393	0.869758	NA	NA
IgD- CD38dim B cell Absolute Count || id:ebi-a-GCST90001438	Inflammatory bowel disease	Weighted median	11	-0.00929775	0.0657013	0.887463	0.990745	0.871036	1.12691	NA	NA	NA	NA
IgD+ CD24+ B cell %lymphocyte || id:ebi-a-GCST90001439	Inflammatory bowel disease	Inverse variance weighted	12	0.00587197	0.0442692	0.894476	1.00589	0.92229	1.09707	4.87609	0.937019	-0.0032774	0.885148
IgD+ CD24+ B cell %lymphocyte || id:ebi-a-GCST90001439	Inflammatory bowel disease	MR Egger	12	0.0254456	0.139317	0.858726	1.02577	0.78066	1.34784	4.85413	0.900707	NA	NA
IgD+ CD24+ B cell %lymphocyte || id:ebi-a-GCST90001439	Inflammatory bowel disease	Weighted median	12	0.0179748	0.0570489	0.752704	1.01814	0.910427	1.13859	NA	NA	NA	NA
IgD- CD24- B cell %lymphocyte || id:ebi-a-GCST90001440	Inflammatory bowel disease	Inverse variance weighted	18	-0.0277493	0.0390054	0.476822	0.972632	0.901045	1.04991	8.42601	0.95657	-0.00666048	0.73442
IgD- CD24- B cell %lymphocyte || id:ebi-a-GCST90001440	Inflammatory bowel disease	MR Egger	18	0.013982	0.127018	0.913716	1.01408	0.790592	1.30075	8.30683	0.939203	NA	NA
IgD- CD24- B cell %lymphocyte || id:ebi-a-GCST90001440	Inflammatory bowel disease	Weighted median	18	-0.0229414	0.0534961	0.668039	0.97732	0.880035	1.08536	NA	NA	NA	NA
IgD+ CD24- B cell %lymphocyte || id:ebi-a-GCST90001441	Inflammatory bowel disease	Inverse variance weighted	17	0.0654694	0.049372	0.184825	1.06766	0.969185	1.17614	23.2569	0.107038	0.0222897	0.492495
IgD+ CD24- B cell %lymphocyte || id:ebi-a-GCST90001441	Inflammatory bowel disease	MR Egger	17	-0.0803047	0.213187	0.711682	0.922835	0.607652	1.4015	22.514	0.0950188	NA	NA
IgD+ CD24- B cell %lymphocyte || id:ebi-a-GCST90001441	Inflammatory bowel disease	Weighted median	17	0.0865314	0.0595928	0.146489	1.09039	0.970183	1.22548	NA	NA	NA	NA
CD24+ CD27+ B cell %lymphocyte || id:ebi-a-GCST90001442	Inflammatory bowel disease	Inverse variance weighted	14	0.00292178	0.0426135	0.945336	1.00293	0.922562	1.09029	6.97704	0.903331	0.0115695	0.603557
CD24+ CD27+ B cell %lymphocyte || id:ebi-a-GCST90001442	Inflammatory bowel disease	MR Egger	14	-0.0731717	0.148909	0.632019	0.929441	0.694173	1.24445	6.69262	0.87724	NA	NA
CD24+ CD27+ B cell %lymphocyte || id:ebi-a-GCST90001442	Inflammatory bowel disease	Weighted median	14	0.028826	0.0581924	0.620348	1.02925	0.9183	1.1536	NA	NA	NA	NA
CD20- B cell %lymphocyte || id:ebi-a-GCST90001443	Inflammatory bowel disease	Inverse variance weighted	11	-0.162757	0.101632	0.10928	0.849798	0.696314	1.03711	52.0664	1.11e-07	0.0459061	0.462718
CD20- B cell %lymphocyte || id:ebi-a-GCST90001443	Inflammatory bowel disease	MR Egger	11	-0.444891	0.382197	0.274338	0.640894	0.303008	1.35556	48.8718	1.75e-07	NA	NA
CD20- B cell %lymphocyte || id:ebi-a-GCST90001443	Inflammatory bowel disease	Weighted median	11	-0.0379043	0.0652059	0.561037	0.962805	0.847294	1.09406	NA	NA	NA	NA
CD20- CD38- B cell %lymphocyte || id:ebi-a-GCST90001444	Inflammatory bowel disease	Inverse variance weighted	20	-0.0666903	0.0845283	0.43013	0.935485	0.792656	1.10405	99.8914	5.6e-13	0.0536035	0.306932
CD20- CD38- B cell %lymphocyte || id:ebi-a-GCST90001444	Inflammatory bowel disease	MR Egger	20	-0.398888	0.326974	0.238231	0.671066	0.353541	1.27377	94.1104	2.62e-12	NA	NA
CD20- CD38- B cell %lymphocyte || id:ebi-a-GCST90001444	Inflammatory bowel disease	Weighted median	20	0.0711178	0.0581964	0.221696	1.07371	0.957962	1.20344	NA	NA	NA	NA
IgD- CD38- B cell %B cell || id:ebi-a-GCST90001445	Inflammatory bowel disease	Inverse variance weighted	6	0.0169078	0.0597598	0.777231	1.01705	0.904637	1.14344	4.23592	0.515973	-0.0286906	0.588116
IgD- CD38- B cell %B cell || id:ebi-a-GCST90001445	Inflammatory bowel disease	MR Egger	6	0.185763	0.293313	0.560923	1.20414	0.677646	2.13968	3.89015	0.421076	NA	NA
IgD- CD38- B cell %B cell || id:ebi-a-GCST90001445	Inflammatory bowel disease	Weighted median	6	0.0345409	0.0741376	0.641285	1.03514	0.895146	1.19704	NA	NA	NA	NA
IgD- CD38- B cell Absolute Count || id:ebi-a-GCST90001446	Inflammatory bowel disease	Inverse variance weighted	7	-0.0470628	0.0711629	0.508395	0.954028	0.829824	1.09682	3.82603	0.700206	-0.0506305	0.305888
IgD- CD38- B cell Absolute Count || id:ebi-a-GCST90001446	Inflammatory bowel disease	MR Egger	7	0.230489	0.253628	0.405147	1.25922	0.765962	2.07011	2.52615	0.772552	NA	NA
IgD- CD38- B cell Absolute Count || id:ebi-a-GCST90001446	Inflammatory bowel disease	Weighted median	7	-0.0436018	0.0900166	0.62812	0.957335	0.802491	1.14206	NA	NA	NA	NA
IgD+ CD38+ B cell %B cell || id:ebi-a-GCST90001447	Inflammatory bowel disease	Inverse variance weighted	14	-0.0111187	0.0403065	0.782661	0.988943	0.913822	1.07024	9.23476	0.754991	0.0135442	0.598233
IgD+ CD38+ B cell %B cell || id:ebi-a-GCST90001447	Inflammatory bowel disease	MR Egger	14	-0.0768219	0.127906	0.559272	0.926055	0.72071	1.18991	8.94179	0.707894	NA	NA
IgD+ CD38+ B cell %B cell || id:ebi-a-GCST90001447	Inflammatory bowel disease	Weighted median	14	-0.0142737	0.0554626	0.796903	0.985828	0.884281	1.09904	NA	NA	NA	NA
CD11c+ monocyte Absolute Count || id:ebi-a-GCST90001448	Inflammatory bowel disease	Inverse variance weighted	10	0.0397638	0.0543287	0.464222	1.04056	0.935457	1.15748	4.52705	0.873437	-0.0344201	0.287912
CD11c+ monocyte Absolute Count || id:ebi-a-GCST90001448	Inflammatory bowel disease	MR Egger	10	0.223579	0.170369	0.22581	1.25054	0.895526	1.7463	3.2312	0.919022	NA	NA
CD11c+ monocyte Absolute Count || id:ebi-a-GCST90001448	Inflammatory bowel disease	Weighted median	10	0.0750985	0.0732557	0.30529	1.07799	0.93381	1.24443	NA	NA	NA	NA
CD11c+ monocyte %monocyte || id:ebi-a-GCST90001449	Inflammatory bowel disease	Inverse variance weighted	13	0.0361787	0.0385176	0.347589	1.03684	0.961447	1.11815	7.53394	0.82041	0.0080925	0.748406
CD11c+ monocyte %monocyte || id:ebi-a-GCST90001449	Inflammatory bowel disease	MR Egger	13	-0.00975674	0.144877	0.947515	0.990291	0.745489	1.31548	7.42576	0.763631	NA	NA
CD11c+ monocyte %monocyte || id:ebi-a-GCST90001449	Inflammatory bowel disease	Weighted median	13	0.0274428	0.0513852	0.5933	1.02782	0.929348	1.13673	NA	NA	NA	NA
CD62L- monocyte Absolute Count || id:ebi-a-GCST90001450	Inflammatory bowel disease	Inverse variance weighted	16	-0.0566034	0.0427273	0.185251	0.944969	0.869055	1.02751	25.0123	0.0497785	0.00209423	0.939573
CD62L- monocyte Absolute Count || id:ebi-a-GCST90001450	Inflammatory bowel disease	MR Egger	16	-0.0675813	0.148952	0.65699	0.934652	0.698006	1.25153	25.0017	0.034551	NA	NA
CD62L- monocyte Absolute Count || id:ebi-a-GCST90001450	Inflammatory bowel disease	Weighted median	16	0.00529609	0.0508507	0.917051	1.00531	0.909945	1.11067	NA	NA	NA	NA
CD62L- monocyte %monocyte || id:ebi-a-GCST90001451	Inflammatory bowel disease	Inverse variance weighted	19	0.0163631	0.0268335	0.541994	1.0165	0.964418	1.07139	10.0617	0.929872	-0.00427771	0.814112
CD62L- monocyte %monocyte || id:ebi-a-GCST90001451	Inflammatory bowel disease	MR Egger	19	0.0356545	0.0851236	0.680566	1.0363	0.877053	1.22446	10.0047	0.903412	NA	NA
CD62L- monocyte %monocyte || id:ebi-a-GCST90001451	Inflammatory bowel disease	Weighted median	19	0.0308378	0.0393989	0.433799	1.03132	0.954675	1.11411	NA	NA	NA	NA
CD11c+ CD62L- monocyte Absolute Count || id:ebi-a-GCST90001452	Inflammatory bowel disease	Inverse variance weighted	17	-0.00724583	0.0449328	0.871889	0.99278	0.909087	1.08418	21.4258	0.162719	-0.0261267	0.3712
CD11c+ CD62L- monocyte Absolute Count || id:ebi-a-GCST90001452	Inflammatory bowel disease	MR Egger	17	0.140207	0.166203	0.41215	1.15051	0.830646	1.59355	20.277	0.161562	NA	NA
CD11c+ CD62L- monocyte Absolute Count || id:ebi-a-GCST90001452	Inflammatory bowel disease	Weighted median	17	0.0212807	0.0573436	0.710557	1.02151	0.912915	1.14302	NA	NA	NA	NA
CD11c+ CD62L- monocyte %monocyte || id:ebi-a-GCST90001453	Inflammatory bowel disease	Inverse variance weighted	15	0.0477912	0.0383255	0.212405	1.04895	0.973043	1.13078	4.58895	0.990751	0.0303655	0.238462
CD11c+ CD62L- monocyte %monocyte || id:ebi-a-GCST90001453	Inflammatory bowel disease	MR Egger	15	-0.107148	0.131119	0.428551	0.898393	0.694793	1.16166	3.06219	0.997701	NA	NA
CD11c+ CD62L- monocyte %monocyte || id:ebi-a-GCST90001453	Inflammatory bowel disease	Weighted median	15	0.0721008	0.050178	0.150746	1.07476	0.974093	1.18584	NA	NA	NA	NA
CD62L- HLA DR++ monocyte Absolute Count || id:ebi-a-GCST90001454	Inflammatory bowel disease	Inverse variance weighted	12	0.0510281	0.0608621	0.401794	1.05235	0.934016	1.18568	21.4186	0.029285	-0.0653213	0.0694476
CD62L- HLA DR++ monocyte Absolute Count || id:ebi-a-GCST90001454	Inflammatory bowel disease	MR Egger	12	0.490387	0.222677	0.0522428	1.63295	1.05542	2.52649	15.1546	0.126526	NA	NA
CD62L- HLA DR++ monocyte Absolute Count || id:ebi-a-GCST90001454	Inflammatory bowel disease	Weighted median	12	0.0694434	0.0641265	0.278847	1.07191	0.945308	1.21547	NA	NA	NA	NA
CD62L- HLA DR++ monocyte %monocyte || id:ebi-a-GCST90001455	Inflammatory bowel disease	Inverse variance weighted	9	0.0449071	0.0450373	0.318712	1.04593	0.957561	1.14246	3.77344	0.876964	-0.0156576	0.543558
CD62L- HLA DR++ monocyte %monocyte || id:ebi-a-GCST90001455	Inflammatory bowel disease	MR Egger	9	0.13129	0.14262	0.387905	1.1403	0.86222	1.50806	3.36595	0.849213	NA	NA
CD62L- HLA DR++ monocyte %monocyte || id:ebi-a-GCST90001455	Inflammatory bowel disease	Weighted median	9	0.00978655	0.0554797	0.859981	1.00983	0.905785	1.12584	NA	NA	NA	NA
CD11c+ HLA DR++ monocyte Absolute Count || id:ebi-a-GCST90001456	Inflammatory bowel disease	Inverse variance weighted	11	0.00848482	0.0476493	0.85867	1.00852	0.918597	1.10725	10.1238	0.429697	-0.0182559	0.619346
CD11c+ HLA DR++ monocyte Absolute Count || id:ebi-a-GCST90001456	Inflammatory bowel disease	MR Egger	11	0.125174	0.232171	0.602867	1.13335	0.719009	1.78645	9.83465	0.364036	NA	NA
CD11c+ HLA DR++ monocyte Absolute Count || id:ebi-a-GCST90001456	Inflammatory bowel disease	Weighted median	11	-0.0377415	0.0600119	0.529415	0.962962	0.856103	1.08316	NA	NA	NA	NA
CD11c+ HLA DR++ monocyte %monocyte || id:ebi-a-GCST90001457	Inflammatory bowel disease	Inverse variance weighted	11	-0.0174519	0.0469513	0.710114	0.982699	0.896303	1.07742	11.4894	0.320684	0.052472	0.0646302
CD11c+ HLA DR++ monocyte %monocyte || id:ebi-a-GCST90001457	Inflammatory bowel disease	MR Egger	11	-0.333524	0.156436	0.0618194	0.716395	0.527219	0.97345	7.05986	0.630887	NA	NA
CD11c+ HLA DR++ monocyte %monocyte || id:ebi-a-GCST90001457	Inflammatory bowel disease	Weighted median	11	-0.0523995	0.0625179	0.401946	0.94895	0.839512	1.07265	NA	NA	NA	NA
Myeloid Dendritic Cell Absolute Count || id:ebi-a-GCST90001458	Inflammatory bowel disease	Inverse variance weighted	12	-0.00780773	0.0335979	0.816237	0.992223	0.928988	1.05976	12.59	0.320964	0.00355955	0.787106
Myeloid Dendritic Cell Absolute Count || id:ebi-a-GCST90001458	Inflammatory bowel disease	MR Egger	12	-0.0221802	0.0625794	0.730375	0.978064	0.865164	1.1057	12.4939	0.253363	NA	NA
Myeloid Dendritic Cell Absolute Count || id:ebi-a-GCST90001458	Inflammatory bowel disease	Weighted median	12	-0.0165188	0.041251	0.688827	0.983617	0.90722	1.06645	NA	NA	NA	NA
Myeloid Dendritic Cell %Dendritic Cell || id:ebi-a-GCST90001459	Inflammatory bowel disease	Inverse variance weighted	20	0.0108783	0.0513116	0.832104	1.01094	0.914212	1.1179	63.7338	9.79e-07	0.00420885	0.842796
Myeloid Dendritic Cell %Dendritic Cell || id:ebi-a-GCST90001459	Inflammatory bowel disease	MR Egger	20	-0.00761235	0.105918	0.943498	0.992417	0.806371	1.22139	63.5908	5.31e-07	NA	NA
Myeloid Dendritic Cell %Dendritic Cell || id:ebi-a-GCST90001459	Inflammatory bowel disease	Weighted median	20	-0.0109924	0.0415135	0.79117	0.989068	0.911778	1.07291	NA	NA	NA	NA
Plasmacytoid Dendritic Cell Absolute Count || id:ebi-a-GCST90001460	Inflammatory bowel disease	Inverse variance weighted	16	-0.0318772	0.0517464	0.537876	0.968625	0.875202	1.07202	34.3772	0.00301345	-0.0230051	0.452639
Plasmacytoid Dendritic Cell Absolute Count || id:ebi-a-GCST90001460	Inflammatory bowel disease	MR Egger	16	0.0953979	0.172898	0.589813	1.1001	0.783894	1.54385	32.9716	0.0029083	NA	NA
Plasmacytoid Dendritic Cell Absolute Count || id:ebi-a-GCST90001460	Inflammatory bowel disease	Weighted median	16	-0.0466428	0.0529995	0.378826	0.954428	0.860259	1.05891	NA	NA	NA	NA
Dendritic Cell Absolute Count || id:ebi-a-GCST90001461	Inflammatory bowel disease	Inverse variance weighted	17	0.0153536	0.0309462	0.619797	1.01547	0.95571	1.07897	17.6511	0.34472	0.000886671	0.945463
Dendritic Cell Absolute Count || id:ebi-a-GCST90001461	Inflammatory bowel disease	MR Egger	17	0.0116614	0.0619571	0.85323	1.01173	0.896036	1.14236	17.6454	0.281766	NA	NA
Dendritic Cell Absolute Count || id:ebi-a-GCST90001461	Inflammatory bowel disease	Weighted median	17	-0.0153697	0.0418365	0.71334	0.984748	0.907221	1.0689	NA	NA	NA	NA
CD62L- Dendritic Cell Absolute Count || id:ebi-a-GCST90001462	Inflammatory bowel disease	Inverse variance weighted	13	-0.0167936	0.0295143	0.569358	0.983347	0.928076	1.04191	11.6898	0.470899	0.00437851	0.746834
CD62L- Dendritic Cell Absolute Count || id:ebi-a-GCST90001462	Inflammatory bowel disease	MR Egger	13	-0.0294	0.0486496	0.557888	0.971028	0.882715	1.06818	11.5745	0.396458	NA	NA
CD62L- Dendritic Cell Absolute Count || id:ebi-a-GCST90001462	Inflammatory bowel disease	Weighted median	13	-0.0140234	0.0364365	0.700331	0.986074	0.918109	1.05907	NA	NA	NA	NA
CD62L- Dendritic Cell %Dendritic Cell || id:ebi-a-GCST90001463	Inflammatory bowel disease	Inverse variance weighted	15	0.00985229	0.0279244	0.724224	1.0099	0.956113	1.06672	10.0806	0.756266	0.00814009	0.469778
CD62L- Dendritic Cell %Dendritic Cell || id:ebi-a-GCST90001463	Inflammatory bowel disease	MR Egger	15	-0.0167014	0.045295	0.718267	0.983437	0.899893	1.07474	9.52624	0.73214	NA	NA
CD62L- Dendritic Cell %Dendritic Cell || id:ebi-a-GCST90001463	Inflammatory bowel disease	Weighted median	15	-0.00539677	0.0351313	0.877912	0.994618	0.928436	1.06552	NA	NA	NA	NA
CD86+ myeloid Dendritic Cell Absolute Count || id:ebi-a-GCST90001464	Inflammatory bowel disease	Inverse variance weighted	12	-0.0177955	0.028283	0.529223	0.982362	0.929387	1.03836	7.19763	0.782861	0.00309202	0.806585
CD86+ myeloid Dendritic Cell Absolute Count || id:ebi-a-GCST90001464	Inflammatory bowel disease	MR Egger	12	-0.0263468	0.0442358	0.564679	0.973997	0.893107	1.06221	7.13442	0.712697	NA	NA
CD86+ myeloid Dendritic Cell Absolute Count || id:ebi-a-GCST90001464	Inflammatory bowel disease	Weighted median	12	-0.0140065	0.0328421	0.669759	0.986091	0.924616	1.05165	NA	NA	NA	NA
CD86+ myeloid Dendritic Cell %Dendritic Cell || id:ebi-a-GCST90001465	Inflammatory bowel disease	Inverse variance weighted	10	-0.0119293	0.030001	0.690902	0.988142	0.931712	1.04799	9.28559	0.41134	0.00682603	0.629492
CD86+ myeloid Dendritic Cell %Dendritic Cell || id:ebi-a-GCST90001465	Inflammatory bowel disease	MR Egger	10	-0.0295367	0.0470544	0.547687	0.970895	0.885358	1.0647	9.00251	0.342084	NA	NA
CD86+ myeloid Dendritic Cell %Dendritic Cell || id:ebi-a-GCST90001465	Inflammatory bowel disease	Weighted median	10	-0.0106415	0.033597	0.751441	0.989415	0.926361	1.05676	NA	NA	NA	NA
CD86+ plasmacytoid Dendritic Cell Absolute Count || id:ebi-a-GCST90001466	Inflammatory bowel disease	Inverse variance weighted	12	-0.0488477	0.0684394	0.47539	0.952326	0.832777	1.08904	18.7195	0.066318	-0.0202827	0.5403
CD86+ plasmacytoid Dendritic Cell Absolute Count || id:ebi-a-GCST90001466	Inflammatory bowel disease	MR Egger	12	0.0824558	0.218729	0.714068	1.08595	0.707333	1.66723	17.9961	0.0550294	NA	NA
CD86+ plasmacytoid Dendritic Cell Absolute Count || id:ebi-a-GCST90001466	Inflammatory bowel disease	Weighted median	12	-0.0606612	0.0700315	0.386381	0.941142	0.820433	1.07961	NA	NA	NA	NA
CD86+ plasmacytoid Dendritic Cell %Dendritic Cell || id:ebi-a-GCST90001467	Inflammatory bowel disease	Inverse variance weighted	17	-0.079072	0.0352165	0.0247481	0.923973	0.862348	0.990003	14.1173	0.589976	-0.00257694	0.88604
CD86+ plasmacytoid Dendritic Cell %Dendritic Cell || id:ebi-a-GCST90001467	Inflammatory bowel disease	MR Egger	17	-0.0637346	0.11095	0.574183	0.938254	0.754879	1.16617	14.096	0.518258	NA	NA
CD86+ plasmacytoid Dendritic Cell %Dendritic Cell || id:ebi-a-GCST90001467	Inflammatory bowel disease	Weighted median	17	-0.0596054	0.0495505	0.229006	0.942136	0.85494	1.03823	NA	NA	NA	NA
CD62L- myeloid Dendritic Cell Absolute Count || id:ebi-a-GCST90001468	Inflammatory bowel disease	Inverse variance weighted	15	0.0173909	0.0266868	0.514617	1.01754	0.965687	1.07218	14.8727	0.386908	0.0183701	0.153556
CD62L- myeloid Dendritic Cell Absolute Count || id:ebi-a-GCST90001468	Inflammatory bowel disease	MR Egger	15	-0.0348374	0.0431038	0.433505	0.965762	0.887523	1.0509	12.5757	0.48109	NA	NA
CD62L- myeloid Dendritic Cell Absolute Count || id:ebi-a-GCST90001468	Inflammatory bowel disease	Weighted median	15	-0.00316974	0.0339725	0.925663	0.996835	0.932621	1.06547	NA	NA	NA	NA
CD62L- myeloid Dendritic Cell %Dendritic Cell || id:ebi-a-GCST90001469	Inflammatory bowel disease	Inverse variance weighted	17	-0.0173052	0.0248246	0.485741	0.982844	0.936167	1.03185	9.65008	0.884252	-0.00405372	0.713564
CD62L- myeloid Dendritic Cell %Dendritic Cell || id:ebi-a-GCST90001469	Inflammatory bowel disease	MR Egger	17	-0.00469283	0.0418674	0.91224	0.995318	0.916904	1.08044	9.51013	0.849372	NA	NA
CD62L- myeloid Dendritic Cell %Dendritic Cell || id:ebi-a-GCST90001469	Inflammatory bowel disease	Weighted median	17	-0.0117176	0.0348695	0.736839	0.988351	0.923059	1.05826	NA	NA	NA	NA
CD62L- plasmacytoid Dendritic Cell Absolute Count || id:ebi-a-GCST90001470	Inflammatory bowel disease	Inverse variance weighted	18	0.0242558	0.0335117	0.469187	1.02455	0.959419	1.09411	20.2376	0.262256	-0.00190562	0.91407
CD62L- plasmacytoid Dendritic Cell Absolute Count || id:ebi-a-GCST90001470	Inflammatory bowel disease	MR Egger	18	0.0338557	0.0941321	0.723803	1.03444	0.860155	1.24403	20.2224	0.210369	NA	NA
CD62L- plasmacytoid Dendritic Cell Absolute Count || id:ebi-a-GCST90001470	Inflammatory bowel disease	Weighted median	18	0.00689376	0.0445624	0.877059	1.00692	0.922702	1.09882	NA	NA	NA	NA
CD62L- plasmacytoid Dendritic Cell %Dendritic Cell || id:ebi-a-GCST90001471	Inflammatory bowel disease	Inverse variance weighted	14	-0.0197515	0.0333404	0.553569	0.980442	0.918422	1.04665	7.91686	0.848974	-0.00633453	0.707698
CD62L- plasmacytoid Dendritic Cell %Dendritic Cell || id:ebi-a-GCST90001471	Inflammatory bowel disease	MR Egger	14	0.0103073	0.0850832	0.905582	1.01036	0.855169	1.19371	7.7694	0.802881	NA	NA
CD62L- plasmacytoid Dendritic Cell %Dendritic Cell || id:ebi-a-GCST90001471	Inflammatory bowel disease	Weighted median	14	-0.0513782	0.0438157	0.240957	0.949919	0.871746	1.0351	NA	NA	NA	NA
CD62L- CD86+ myeloid Dendritic Cell Absolute Count || id:ebi-a-GCST90001472	Inflammatory bowel disease	Inverse variance weighted	12	0.0141638	0.0233445	0.54403	1.01426	0.968902	1.06175	6.77517	0.816988	0.0141433	0.283343
CD62L- CD86+ myeloid Dendritic Cell Absolute Count || id:ebi-a-GCST90001472	Inflammatory bowel disease	MR Egger	12	-0.0198277	0.0379979	0.613163	0.980368	0.910007	1.05617	5.48975	0.856158	NA	NA
CD62L- CD86+ myeloid Dendritic Cell Absolute Count || id:ebi-a-GCST90001472	Inflammatory bowel disease	Weighted median	12	0.0121537	0.0276165	0.659873	1.01223	0.958894	1.06853	NA	NA	NA	NA
CD62L- CD86+ myeloid Dendritic Cell %Dendritic Cell || id:ebi-a-GCST90001473	Inflammatory bowel disease	Inverse variance weighted	14	0.011907	0.0234041	0.610922	1.01198	0.966605	1.05948	7.86612	0.852211	0.012198	0.270218
CD62L- CD86+ myeloid Dendritic Cell %Dendritic Cell || id:ebi-a-GCST90001473	Inflammatory bowel disease	MR Egger	14	-0.0200933	0.0362515	0.589572	0.980107	0.912884	1.05228	6.53002	0.887048	NA	NA
CD62L- CD86+ myeloid Dendritic Cell %Dendritic Cell || id:ebi-a-GCST90001473	Inflammatory bowel disease	Weighted median	14	0.00906948	0.0291401	0.75562	1.00911	0.953091	1.06842	NA	NA	NA	NA
Plasmacytoid Dendritic Cell %Dendritic Cell || id:ebi-a-GCST90001474	Inflammatory bowel disease	Inverse variance weighted	20	-0.029163	0.0377146	0.439372	0.971258	0.902052	1.04577	38.0602	0.00583097	0.0072282	0.665828
Plasmacytoid Dendritic Cell %Dendritic Cell || id:ebi-a-GCST90001474	Inflammatory bowel disease	MR Egger	20	-0.0616769	0.08348	0.46954	0.940187	0.798279	1.10732	37.6568	0.00429903	NA	NA
Plasmacytoid Dendritic Cell %Dendritic Cell || id:ebi-a-GCST90001474	Inflammatory bowel disease	Weighted median	20	0.00712019	0.039853	0.858204	1.00715	0.93147	1.08897	NA	NA	NA	NA
HLA DR++ monocyte %monocyte || id:ebi-a-GCST90001475	Inflammatory bowel disease	Inverse variance weighted	12	0.136121	0.0802355	0.0897882	1.14582	0.979081	1.34096	45.8232	3.47e-06	-0.0723564	0.136112
HLA DR++ monocyte %monocyte || id:ebi-a-GCST90001475	Inflammatory bowel disease	MR Egger	12	0.534975	0.257216	0.0642125	1.70741	1.03131	2.82672	36.2892	7.51e-05	NA	NA
HLA DR++ monocyte %monocyte || id:ebi-a-GCST90001475	Inflammatory bowel disease	Weighted median	12	0.0082893	0.0584769	0.887275	1.00832	0.899132	1.13078	NA	NA	NA	NA
HLA DR++ monocyte %leukocyte || id:ebi-a-GCST90001476	Inflammatory bowel disease	Inverse variance weighted	3	0.236709	0.223207	0.28892	1.26707	0.818096	1.96245	34.4378	3.33e-08	0.259044	0.653949
HLA DR++ monocyte %leukocyte || id:ebi-a-GCST90001476	Inflammatory bowel disease	MR Egger	3	-0.84805	1.81528	0.72177	0.428249	0.0122038	15.0279	25.2259	5.1e-07	NA	NA
HLA DR++ monocyte %leukocyte || id:ebi-a-GCST90001476	Inflammatory bowel disease	Weighted median	3	0.0199825	0.0713158	0.779327	1.02018	0.887101	1.17323	NA	NA	NA	NA
HLA DR++ monocyte Absolute Count || id:ebi-a-GCST90001477	Inflammatory bowel disease	Inverse variance weighted	12	0.0504939	0.0513823	0.32575	1.05179	0.951025	1.16323	15.6904	0.15302	-0.012686	0.69279
HLA DR++ monocyte Absolute Count || id:ebi-a-GCST90001477	Inflammatory bowel disease	MR Egger	12	0.119659	0.178263	0.517265	1.12711	0.794743	1.59848	15.4351	0.116987	NA	NA
HLA DR++ monocyte Absolute Count || id:ebi-a-GCST90001477	Inflammatory bowel disease	Weighted median	12	0.0310057	0.0595227	0.602432	1.03149	0.917907	1.15913	NA	NA	NA	NA
CD4 regulatory T cell %CD4+ T cell || id:ebi-a-GCST90001478	Inflammatory bowel disease	Inverse variance weighted	14	0.0390919	0.0471631	0.407181	1.03987	0.94805	1.14057	18.8953	0.126385	-0.00451209	0.877541
CD4 regulatory T cell %CD4+ T cell || id:ebi-a-GCST90001478	Inflammatory bowel disease	MR Egger	14	0.0622675	0.155185	0.695291	1.06425	0.785139	1.44257	18.8564	0.0920539	NA	NA
CD4 regulatory T cell %CD4+ T cell || id:ebi-a-GCST90001478	Inflammatory bowel disease	Weighted median	14	-0.00603535	0.0584845	0.917808	0.993983	0.886331	1.11471	NA	NA	NA	NA
CD4 regulatory T cell %T cell || id:ebi-a-GCST90001479	Inflammatory bowel disease	Inverse variance weighted	13	0.00361202	0.0541237	0.946791	1.00362	0.902605	1.11594	24.4761	0.0175101	-0.00988794	0.735479
CD4 regulatory T cell %T cell || id:ebi-a-GCST90001479	Inflammatory bowel disease	MR Egger	13	0.0584015	0.167806	0.734387	1.06014	0.762999	1.473	24.2118	0.0118693	NA	NA
CD4 regulatory T cell %T cell || id:ebi-a-GCST90001479	Inflammatory bowel disease	Weighted median	13	-0.0166974	0.0577261	0.772389	0.983441	0.878235	1.10125	NA	NA	NA	NA
Resting CD4 regulatory T cell Absolute Count || id:ebi-a-GCST90001480	Inflammatory bowel disease	Inverse variance weighted	15	-0.00992233	0.0432831	0.81868	0.990127	0.909594	1.07779	18.6913	0.177082	-0.0480419	0.179548
Resting CD4 regulatory T cell Absolute Count || id:ebi-a-GCST90001480	Inflammatory bowel disease	MR Egger	15	0.232551	0.175963	0.209091	1.26181	0.893743	1.78147	16.1858	0.239242	NA	NA
Resting CD4 regulatory T cell Absolute Count || id:ebi-a-GCST90001480	Inflammatory bowel disease	Weighted median	15	-0.0159663	0.0588401	0.786121	0.98416	0.876961	1.10446	NA	NA	NA	NA
Resting CD4 regulatory T cell %CD4 regulatory T cell || id:ebi-a-GCST90001481	Inflammatory bowel disease	Inverse variance weighted	12	-0.00643518	0.0499138	0.897416	0.993585	0.900985	1.0957	19.9043	0.0466712	-0.0517171	0.131168
Resting CD4 regulatory T cell %CD4 regulatory T cell || id:ebi-a-GCST90001481	Inflammatory bowel disease	MR Egger	12	0.213354	0.141517	0.162575	1.23782	0.937987	1.6335	15.6686	0.109521	NA	NA
Resting CD4 regulatory T cell %CD4 regulatory T cell || id:ebi-a-GCST90001481	Inflammatory bowel disease	Weighted median	12	0.0763598	0.0532982	0.151946	1.07935	0.972287	1.1982	NA	NA	NA	NA
Resting CD4 regulatory T cell %CD4+ T cell || id:ebi-a-GCST90001482	Inflammatory bowel disease	Inverse variance weighted	17	-0.00105596	0.0388943	0.978341	0.998945	0.925622	1.07807	18.6267	0.288495	-0.0357175	0.305331
Resting CD4 regulatory T cell %CD4+ T cell || id:ebi-a-GCST90001482	Inflammatory bowel disease	MR Egger	17	0.158875	0.15559	0.323388	1.17219	0.864088	1.59015	17.3256	0.299773	NA	NA
Resting CD4 regulatory T cell %CD4+ T cell || id:ebi-a-GCST90001482	Inflammatory bowel disease	Weighted median	17	0.00209926	0.0530574	0.968439	1.0021	0.903126	1.11192	NA	NA	NA	NA
CD39+ resting CD4 regulatory T cell Absolute Count || id:ebi-a-GCST90001483	Inflammatory bowel disease	Inverse variance weighted	15	-0.00872136	0.019388	0.652831	0.991317	0.954353	1.02971	15.7017	0.331928	0.0144569	0.18151
CD39+ resting CD4 regulatory T cell Absolute Count || id:ebi-a-GCST90001483	Inflammatory bowel disease	MR Egger	15	-0.0441135	0.0312968	0.182153	0.956845	0.899915	1.01738	13.6145	0.401543	NA	NA
CD39+ resting CD4 regulatory T cell Absolute Count || id:ebi-a-GCST90001483	Inflammatory bowel disease	Weighted median	15	-0.0138278	0.022117	0.531833	0.986267	0.944427	1.02996	NA	NA	NA	NA
CD39+ resting CD4 regulatory T cell %resting CD4 regulatory T cell || id:ebi-a-GCST90001484	Inflammatory bowel disease	Inverse variance weighted	17	0.001555	0.02694	0.953971	1.00156	0.950044	1.05586	15.3168	0.501568	0.0220018	0.10857
CD39+ resting CD4 regulatory T cell %resting CD4 regulatory T cell || id:ebi-a-GCST90001484	Inflammatory bowel disease	MR Egger	17	-0.0936632	0.0619673	0.151442	0.910589	0.806445	1.02818	12.4055	0.648116	NA	NA
CD39+ resting CD4 regulatory T cell %resting CD4 regulatory T cell || id:ebi-a-GCST90001484	Inflammatory bowel disease	Weighted median	17	-0.0261016	0.037194	0.482823	0.974236	0.905741	1.04791	NA	NA	NA	NA
CD39+ resting CD4 regulatory T cell %CD4 regulatory T cell || id:ebi-a-GCST90001485	Inflammatory bowel disease	Inverse variance weighted	19	-0.00352267	0.0172735	0.838404	0.996484	0.963311	1.0308	18.101	0.449017	0.0129144	0.133442
CD39+ resting CD4 regulatory T cell %CD4 regulatory T cell || id:ebi-a-GCST90001485	Inflammatory bowel disease	MR Egger	19	-0.0367532	0.0272265	0.194747	0.963914	0.913824	1.01675	15.6171	0.551122	NA	NA
CD39+ resting CD4 regulatory T cell %CD4 regulatory T cell || id:ebi-a-GCST90001485	Inflammatory bowel disease	Weighted median	19	-0.0117744	0.0203721	0.563287	0.988295	0.94961	1.02855	NA	NA	NA	NA
Activated CD4 regulatory T cell Absolute Count || id:ebi-a-GCST90001486	Inflammatory bowel disease	Inverse variance weighted	7	0.0571795	0.0615304	0.35274	1.05885	0.938549	1.19456	2.17996	0.902426	-0.0131255	0.783825
Activated CD4 regulatory T cell Absolute Count || id:ebi-a-GCST90001486	Inflammatory bowel disease	MR Egger	7	0.148734	0.322191	0.663732	1.16036	0.617078	2.18197	2.09615	0.835687	NA	NA
Activated CD4 regulatory T cell Absolute Count || id:ebi-a-GCST90001486	Inflammatory bowel disease	Weighted median	7	0.0454857	0.0768406	0.553885	1.04654	0.900215	1.21664	NA	NA	NA	NA
Activated CD4 regulatory T cell %CD4 regulatory T cell || id:ebi-a-GCST90001487	Inflammatory bowel disease	Inverse variance weighted	17	-0.00180527	0.0576515	0.97502	0.998196	0.891542	1.11761	36.9462	0.00213395	-0.0204705	0.546473
Activated CD4 regulatory T cell %CD4 regulatory T cell || id:ebi-a-GCST90001487	Inflammatory bowel disease	MR Egger	17	0.128984	0.219974	0.566353	1.13767	0.739216	1.75091	36.0317	0.0017493	NA	NA
Activated CD4 regulatory T cell %CD4 regulatory T cell || id:ebi-a-GCST90001487	Inflammatory bowel disease	Weighted median	17	-0.0184012	0.0565532	0.744895	0.981767	0.878758	1.09685	NA	NA	NA	NA
Activated CD4 regulatory T cell %CD4+ T cell || id:ebi-a-GCST90001488	Inflammatory bowel disease	Inverse variance weighted	10	-0.102681	0.0682656	0.132546	0.902415	0.789401	1.03161	16.0285	0.0662878	-0.0208376	0.701092
Activated CD4 regulatory T cell %CD4+ T cell || id:ebi-a-GCST90001488	Inflammatory bowel disease	MR Egger	10	0.0464112	0.381471	0.906166	1.04751	0.495954	2.21244	15.7174	0.0466075	NA	NA
Activated CD4 regulatory T cell %CD4+ T cell || id:ebi-a-GCST90001488	Inflammatory bowel disease	Weighted median	10	-0.036274	0.0692561	0.600442	0.964376	0.841966	1.10458	NA	NA	NA	NA
CD39+ activated CD4 regulatory T cell Absolute Count || id:ebi-a-GCST90001489	Inflammatory bowel disease	Inverse variance weighted	24	0.0445729	0.0275921	0.10622	1.04558	0.990537	1.10368	30.1184	0.146033	0.0515215	0.000846953
CD39+ activated CD4 regulatory T cell Absolute Count || id:ebi-a-GCST90001489	Inflammatory bowel disease	MR Egger	24	-0.188864	0.0650976	0.00828182	0.827899	0.728728	0.940567	15.2147	0.852862	NA	NA
CD39+ activated CD4 regulatory T cell Absolute Count || id:ebi-a-GCST90001489	Inflammatory bowel disease	Weighted median	24	0.0258922	0.0357477	0.468878	1.02623	0.956788	1.10071	NA	NA	NA	NA
CD39+ activated CD4 regulatory T cell %activated CD4 regulatory T cell || id:ebi-a-GCST90001490	Inflammatory bowel disease	Inverse variance weighted	3	0.00242194	0.0867478	0.977726	1.00242	0.845689	1.18821	1.551	0.460473	-0.0245131	0.790901
CD39+ activated CD4 regulatory T cell %activated CD4 regulatory T cell || id:ebi-a-GCST90001490	Inflammatory bowel disease	MR Egger	3	0.14074	0.418551	0.793494	1.15113	0.506809	2.61457	1.38961	0.238471	NA	NA
CD39+ activated CD4 regulatory T cell %activated CD4 regulatory T cell || id:ebi-a-GCST90001490	Inflammatory bowel disease	Weighted median	3	-0.0239965	0.154947	0.876925	0.976289	0.720584	1.32273	NA	NA	NA	NA
CD39+ activated CD4 regulatory T cell %CD4 regulatory T cell || id:ebi-a-GCST90001491	Inflammatory bowel disease	Inverse variance weighted	14	0.00918546	0.0312839	0.769051	1.00923	0.949205	1.07305	14.72	0.325158	0.0389298	0.0468082
CD39+ activated CD4 regulatory T cell %CD4 regulatory T cell || id:ebi-a-GCST90001491	Inflammatory bowel disease	MR Egger	14	-0.155375	0.0798809	0.0755721	0.856094	0.732024	1.00119	9.81116	0.632523	NA	NA
CD39+ activated CD4 regulatory T cell %CD4 regulatory T cell || id:ebi-a-GCST90001491	Inflammatory bowel disease	Weighted median	14	-0.0248742	0.0385026	0.518254	0.975433	0.90453	1.05189	NA	NA	NA	NA
Secreting CD4 regulatory T cell Absolute Count || id:ebi-a-GCST90001492	Inflammatory bowel disease	Inverse variance weighted	8	0.125697	0.0798124	0.115278	1.13394	0.969732	1.32595	21.4058	0.00321377	0.0417889	0.272649
Secreting CD4 regulatory T cell Absolute Count || id:ebi-a-GCST90001492	Inflammatory bowel disease	MR Egger	8	-0.0924615	0.19651	0.654603	0.911684	0.620257	1.34004	17.2205	0.00850599	NA	NA
Secreting CD4 regulatory T cell Absolute Count || id:ebi-a-GCST90001492	Inflammatory bowel disease	Weighted median	8	0.0455878	0.0650418	0.483365	1.04664	0.92137	1.18895	NA	NA	NA	NA
Secreting CD4 regulatory T cell %CD4 regulatory T cell || id:ebi-a-GCST90001493	Inflammatory bowel disease	Inverse variance weighted	16	0.0255542	0.0405692	0.528765	1.02588	0.947469	1.11079	23.3531	0.076925	0.0064027	0.773137
Secreting CD4 regulatory T cell %CD4 regulatory T cell || id:ebi-a-GCST90001493	Inflammatory bowel disease	MR Egger	16	-0.00699011	0.118378	0.953747	0.993034	0.787407	1.25236	23.2099	0.0569388	NA	NA
Secreting CD4 regulatory T cell %CD4 regulatory T cell || id:ebi-a-GCST90001493	Inflammatory bowel disease	Weighted median	16	-0.0377288	0.0482762	0.434498	0.962974	0.876034	1.05854	NA	NA	NA	NA
Secreting CD4 regulatory T cell %CD4+ T cell || id:ebi-a-GCST90001494	Inflammatory bowel disease	Inverse variance weighted	16	0.0617743	0.0383223	0.106969	1.06372	0.986751	1.1467	19.3201	0.199595	-0.0294415	0.187621
Secreting CD4 regulatory T cell %CD4+ T cell || id:ebi-a-GCST90001494	Inflammatory bowel disease	MR Egger	16	0.236015	0.131159	0.0935305	1.26619	0.979163	1.63736	16.9909	0.256666	NA	NA
Secreting CD4 regulatory T cell %CD4+ T cell || id:ebi-a-GCST90001494	Inflammatory bowel disease	Weighted median	16	0.0545458	0.0480126	0.255926	1.05606	0.961213	1.16027	NA	NA	NA	NA
CD39+ secreting CD4 regulatory T cell Absolute Count || id:ebi-a-GCST90001495	Inflammatory bowel disease	Inverse variance weighted	19	0.0189834	0.0254796	0.456247	1.01916	0.969518	1.07135	18.6793	0.411819	0.0184365	0.289015
CD39+ secreting CD4 regulatory T cell Absolute Count || id:ebi-a-GCST90001495	Inflammatory bowel disease	MR Egger	19	-0.0556702	0.072765	0.454721	0.945851	0.820132	1.09084	17.4497	0.424323	NA	NA
CD39+ secreting CD4 regulatory T cell Absolute Count || id:ebi-a-GCST90001495	Inflammatory bowel disease	Weighted median	19	0.0100407	0.0363314	0.782268	1.01009	0.940664	1.08464	NA	NA	NA	NA
CD39+ secreting CD4 regulatory T cell %secreting CD4 regulatory T cell || id:ebi-a-GCST90001496	Inflammatory bowel disease	Inverse variance weighted	13	-0.0339008	0.0289282	0.241239	0.966667	0.913383	1.02306	8.55198	0.740646	0.00860342	0.54577
CD39+ secreting CD4 regulatory T cell %secreting CD4 regulatory T cell || id:ebi-a-GCST90001496	Inflammatory bowel disease	MR Egger	13	-0.0672109	0.0607658	0.292302	0.934998	0.830015	1.05326	8.16343	0.698593	NA	NA
CD39+ secreting CD4 regulatory T cell %secreting CD4 regulatory T cell || id:ebi-a-GCST90001496	Inflammatory bowel disease	Weighted median	13	-0.0151588	0.0394776	0.700989	0.984955	0.911617	1.06419	NA	NA	NA	NA
CD39+ secreting CD4 regulatory T cell %CD4 regulatory T cell || id:ebi-a-GCST90001497	Inflammatory bowel disease	Inverse variance weighted	12	-0.0170795	0.0299824	0.568915	0.983066	0.92696	1.04257	10.2193	0.510774	0.00453001	0.799341
CD39+ secreting CD4 regulatory T cell %CD4 regulatory T cell || id:ebi-a-GCST90001497	Inflammatory bowel disease	MR Egger	12	-0.033597	0.0701107	0.642104	0.966961	0.84281	1.1094	10.1501	0.427421	NA	NA
CD39+ secreting CD4 regulatory T cell %CD4 regulatory T cell || id:ebi-a-GCST90001497	Inflammatory bowel disease	Weighted median	12	-0.00550762	0.0393989	0.888825	0.994508	0.9206	1.07435	NA	NA	NA	NA
Activated & resting CD4 regulatory T cell Absolute Count || id:ebi-a-GCST90001498	Inflammatory bowel disease	Inverse variance weighted	11	-0.0156025	0.0703191	0.824406	0.984519	0.857763	1.13001	23.4497	0.00920308	-0.033272	0.442041
Activated & resting CD4 regulatory T cell Absolute Count || id:ebi-a-GCST90001498	Inflammatory bowel disease	MR Egger	11	0.196954	0.273854	0.490273	1.21769	0.711912	2.08279	21.8778	0.00927444	NA	NA
Activated & resting CD4 regulatory T cell Absolute Count || id:ebi-a-GCST90001498	Inflammatory bowel disease	Weighted median	11	0.0867176	0.0691922	0.210101	1.09059	0.952277	1.24899	NA	NA	NA	NA
Activated & resting CD4 regulatory T cell %CD4 regulatory T cell || id:ebi-a-GCST90001499	Inflammatory bowel disease	Inverse variance weighted	15	-0.0313095	0.0408343	0.443233	0.969176	0.89463	1.04993	21.5852	0.0875488	-0.0051801	0.815317
Activated & resting CD4 regulatory T cell %CD4 regulatory T cell || id:ebi-a-GCST90001499	Inflammatory bowel disease	MR Egger	15	-0.00492337	0.118499	0.967491	0.995089	0.788848	1.25525	21.4913	0.063763	NA	NA
Activated & resting CD4 regulatory T cell %CD4 regulatory T cell || id:ebi-a-GCST90001499	Inflammatory bowel disease	Weighted median	15	0.0252275	0.049167	0.607883	1.02555	0.931332	1.1293	NA	NA	NA	NA
Activated & resting CD4 regulatory T cell %CD4+ T cell || id:ebi-a-GCST90001500	Inflammatory bowel disease	Inverse variance weighted	15	0.0291019	0.0406397	0.473933	1.02953	0.950704	1.11489	17.1062	0.250565	-0.00153622	0.955595
Activated & resting CD4 regulatory T cell %CD4+ T cell || id:ebi-a-GCST90001500	Inflammatory bowel disease	MR Egger	15	0.03851	0.171016	0.825337	1.03926	0.743281	1.4531	17.1019	0.194687	NA	NA
Activated & resting CD4 regulatory T cell %CD4+ T cell || id:ebi-a-GCST90001500	Inflammatory bowel disease	Weighted median	15	0.0843604	0.0533776	0.114005	1.08802	0.979944	1.20802	NA	NA	NA	NA
Activated & secreting CD4 regulatory T cell Absolute Count || id:ebi-a-GCST90001501	Inflammatory bowel disease	Inverse variance weighted	8	0.0571099	0.0556124	0.304454	1.05877	0.949433	1.1807	10.1556	0.179926	0.0226252	0.462541
Activated & secreting CD4 regulatory T cell Absolute Count || id:ebi-a-GCST90001501	Inflammatory bowel disease	MR Egger	8	-0.0555691	0.15459	0.731563	0.945947	0.698678	1.28073	9.21063	0.162074	NA	NA
Activated & secreting CD4 regulatory T cell Absolute Count || id:ebi-a-GCST90001501	Inflammatory bowel disease	Weighted median	8	0.0489759	0.0611492	0.423176	1.0502	0.931577	1.18392	NA	NA	NA	NA
Activated & secreting CD4 regulatory T cell %CD4 regulatory T cell || id:ebi-a-GCST90001502	Inflammatory bowel disease	Inverse variance weighted	14	0.00578108	0.0405608	0.886663	1.0058	0.928933	1.08902	17.8226	0.164373	0.0593222	0.0101439
Activated & secreting CD4 regulatory T cell %CD4 regulatory T cell || id:ebi-a-GCST90001502	Inflammatory bowel disease	MR Egger	14	-0.276479	0.0989048	0.0161815	0.75845	0.624795	0.920696	8.53927	0.741697	NA	NA
Activated & secreting CD4 regulatory T cell %CD4 regulatory T cell || id:ebi-a-GCST90001502	Inflammatory bowel disease	Weighted median	14	-0.0438185	0.0501597	0.382347	0.957128	0.867507	1.05601	NA	NA	NA	NA
Activated & secreting CD4 regulatory T cell %CD4+ T cell || id:ebi-a-GCST90001503	Inflammatory bowel disease	Inverse variance weighted	15	-0.0104499	0.0482269	0.828456	0.989605	0.900347	1.08771	27.3715	0.0172197	0.00788186	0.743691
Activated & secreting CD4 regulatory T cell %CD4+ T cell || id:ebi-a-GCST90001503	Inflammatory bowel disease	MR Egger	15	-0.0541073	0.139881	0.705155	0.94733	0.720166	1.24615	27.1386	0.0119084	NA	NA
Activated & secreting CD4 regulatory T cell %CD4+ T cell || id:ebi-a-GCST90001503	Inflammatory bowel disease	Weighted median	15	0.0103275	0.0490826	0.833346	1.01038	0.91771	1.11241	NA	NA	NA	NA
CD25++ CD4+ T cell Absolute Count || id:ebi-a-GCST90001504	Inflammatory bowel disease	Inverse variance weighted	10	0.0342526	0.0574527	0.55105	1.03485	0.924636	1.15819	17.9071	0.0362666	0.0120393	0.714751
CD25++ CD4+ T cell Absolute Count || id:ebi-a-GCST90001504	Inflammatory bowel disease	MR Egger	10	-0.0118363	0.135861	0.932717	0.988233	0.757203	1.28975	17.5917	0.0245046	NA	NA
CD25++ CD4+ T cell Absolute Count || id:ebi-a-GCST90001504	Inflammatory bowel disease	Weighted median	10	0.0164444	0.0555613	0.767254	1.01658	0.91169	1.13354	NA	NA	NA	NA
CD25++ CD4+ T cell %CD4+ T cell || id:ebi-a-GCST90001505	Inflammatory bowel disease	Inverse variance weighted	16	-0.0411755	0.040299	0.306899	0.959661	0.886777	1.03853	22.8402	0.0875911	-0.0147435	0.388999
CD25++ CD4+ T cell %CD4+ T cell || id:ebi-a-GCST90001505	Inflammatory bowel disease	MR Egger	16	0.0178439	0.0778075	0.821926	1.018	0.874014	1.18572	21.6197	0.0867745	NA	NA
CD25++ CD4+ T cell %CD4+ T cell || id:ebi-a-GCST90001505	Inflammatory bowel disease	Weighted median	16	0.00870108	0.0434045	0.841117	1.00874	0.926472	1.09831	NA	NA	NA	NA
CD25++ CD4+ T cell %T cell || id:ebi-a-GCST90001506	Inflammatory bowel disease	Inverse variance weighted	13	0.0354483	0.0410448	0.38778	1.03608	0.955998	1.12288	17.7521	0.123426	0.00905124	0.631155
CD25++ CD4+ T cell %T cell || id:ebi-a-GCST90001506	Inflammatory bowel disease	MR Egger	13	-0.00438057	0.0911236	0.96252	0.995629	0.832782	1.19032	17.3672	0.0974745	NA	NA
CD25++ CD4+ T cell %T cell || id:ebi-a-GCST90001506	Inflammatory bowel disease	Weighted median	13	0.0103943	0.0469043	0.82462	1.01045	0.921698	1.10775	NA	NA	NA	NA
CD25++ CD45RA+ CD4 not regulatory T cell Absolute Count || id:ebi-a-GCST90001507	Inflammatory bowel disease	Inverse variance weighted	15	-0.030575	0.0505088	0.544953	0.969888	0.878471	1.07082	30.8157	0.00588225	0.0149505	0.704428
CD25++ CD45RA+ CD4 not regulatory T cell Absolute Count || id:ebi-a-GCST90001507	Inflammatory bowel disease	MR Egger	15	-0.102827	0.193457	0.60402	0.902283	0.617545	1.31831	30.4633	0.00403655	NA	NA
CD25++ CD45RA+ CD4 not regulatory T cell Absolute Count || id:ebi-a-GCST90001507	Inflammatory bowel disease	Weighted median	15	0.0269534	0.0536151	0.615161	1.02732	0.924842	1.14115	NA	NA	NA	NA
CD25++ CD45RA+ CD4 not regulatory T cell %CD4+ T cell || id:ebi-a-GCST90001508	Inflammatory bowel disease	Inverse variance weighted	17	0.0403759	0.0446134	0.365456	1.0412	0.954024	1.13635	30.7821	0.0143444	-0.00835864	0.76987
CD25++ CD45RA+ CD4 not regulatory T cell %CD4+ T cell || id:ebi-a-GCST90001508	Inflammatory bowel disease	MR Egger	17	0.0865196	0.161569	0.600157	1.09037	0.79441	1.4966	30.6011	0.00992934	NA	NA
CD25++ CD45RA+ CD4 not regulatory T cell %CD4+ T cell || id:ebi-a-GCST90001508	Inflammatory bowel disease	Weighted median	17	0.0526319	0.0490049	0.282817	1.05404	0.957511	1.1603	NA	NA	NA	NA
CD25++ CD45RA+ CD4 not regulatory T cell %T cell || id:ebi-a-GCST90001509	Inflammatory bowel disease	Inverse variance weighted	12	0.0666631	0.0392765	0.0896442	1.06894	0.989734	1.15447	11.7744	0.38084	0.032037	0.236992
CD25++ CD45RA+ CD4 not regulatory T cell %T cell || id:ebi-a-GCST90001509	Inflammatory bowel disease	MR Egger	12	-0.0990065	0.137148	0.486896	0.905737	0.692244	1.18507	10.1657	0.426076	NA	NA
CD25++ CD45RA+ CD4 not regulatory T cell %T cell || id:ebi-a-GCST90001509	Inflammatory bowel disease	Weighted median	12	0.0752489	0.0549831	0.17113	1.07815	0.968005	1.20083	NA	NA	NA	NA
CD25++ CD45RA- CD4 not regulatory T cell Absolute Count || id:ebi-a-GCST90001510	Inflammatory bowel disease	Inverse variance weighted	7	-0.0246198	0.0400539	0.538776	0.975681	0.902014	1.05536	6.34439	0.385737	-0.0195491	0.380357
CD25++ CD45RA- CD4 not regulatory T cell Absolute Count || id:ebi-a-GCST90001510	Inflammatory bowel disease	MR Egger	7	0.0380336	0.0766079	0.640615	1.03877	0.893939	1.20706	5.35399	0.374222	NA	NA
CD25++ CD45RA- CD4 not regulatory T cell Absolute Count || id:ebi-a-GCST90001510	Inflammatory bowel disease	Weighted median	7	0.00819968	0.0451316	0.855831	1.00823	0.922878	1.10148	NA	NA	NA	NA
CD25++ CD45RA- CD4 not regulatory T cell %CD4+ T cell || id:ebi-a-GCST90001511	Inflammatory bowel disease	Inverse variance weighted	16	-0.0119914	0.0323239	0.710655	0.98808	0.927422	1.05271	11.795	0.694476	-0.00950492	0.516268
CD25++ CD45RA- CD4 not regulatory T cell %CD4+ T cell || id:ebi-a-GCST90001511	Inflammatory bowel disease	MR Egger	16	0.0214973	0.0597799	0.724507	1.02173	0.908763	1.14874	11.3515	0.658228	NA	NA
CD25++ CD45RA- CD4 not regulatory T cell %CD4+ T cell || id:ebi-a-GCST90001511	Inflammatory bowel disease	Weighted median	16	0.0102372	0.0413745	0.804577	1.01029	0.931595	1.09563	NA	NA	NA	NA
CD25++ CD45RA- CD4 not regulatory T cell %T cell || id:ebi-a-GCST90001512	Inflammatory bowel disease	Inverse variance weighted	18	0.0447605	0.0303212	0.139887	1.04578	0.985438	1.10981	10.5431	0.879307	0.0177533	0.19648
CD25++ CD45RA- CD4 not regulatory T cell %T cell || id:ebi-a-GCST90001512	Inflammatory bowel disease	MR Egger	18	-0.0288377	0.0624576	0.6505	0.971574	0.859629	1.0981	8.72638	0.924252	NA	NA
CD25++ CD45RA- CD4 not regulatory T cell %T cell || id:ebi-a-GCST90001512	Inflammatory bowel disease	Weighted median	18	0.0203765	0.0422186	0.629349	1.02059	0.939533	1.10863	NA	NA	NA	NA
CD4 regulatory T cell Absolute Count || id:ebi-a-GCST90001513	Inflammatory bowel disease	Inverse variance weighted	14	0.113416	0.0540238	0.0357841	1.1201	1.00756	1.24521	25.2832	0.0211824	0.0798357	0.0149605
CD4 regulatory T cell Absolute Count || id:ebi-a-GCST90001513	Inflammatory bowel disease	MR Egger	14	-0.318367	0.158255	0.0672551	0.727336	0.533366	0.991846	15.1302	0.234393	NA	NA
CD4 regulatory T cell Absolute Count || id:ebi-a-GCST90001513	Inflammatory bowel disease	Weighted median	14	0.0840194	0.0558922	0.132777	1.08765	0.974794	1.21357	NA	NA	NA	NA
Hematopoietic Stem Cell Absolute Count || id:ebi-a-GCST90001514	Inflammatory bowel disease	Inverse variance weighted	13	-0.0225833	0.0361482	0.532141	0.97767	0.910798	1.04945	14.725	0.256823	-0.000904233	0.970664
Hematopoietic Stem Cell Absolute Count || id:ebi-a-GCST90001514	Inflammatory bowel disease	MR Egger	13	-0.0184063	0.117273	0.878126	0.981762	0.780157	1.23547	14.7231	0.195529	NA	NA
Hematopoietic Stem Cell Absolute Count || id:ebi-a-GCST90001514	Inflammatory bowel disease	Weighted median	13	-0.0378724	0.0468308	0.418683	0.962836	0.878393	1.0554	NA	NA	NA	NA
Immature Myeloid-Derived Suppressor Cells Absolute Count || id:ebi-a-GCST90001515	Inflammatory bowel disease	Inverse variance weighted	15	-0.0104635	0.0311953	0.737309	0.989591	0.930897	1.05199	23.1956	0.0571597	0.0254874	0.20787
Immature Myeloid-Derived Suppressor Cells Absolute Count || id:ebi-a-GCST90001515	Inflammatory bowel disease	MR Egger	15	-0.111665	0.0821803	0.197327	0.894344	0.761292	1.05065	20.4345	0.0848939	NA	NA
Immature Myeloid-Derived Suppressor Cells Absolute Count || id:ebi-a-GCST90001515	Inflammatory bowel disease	Weighted median	15	-0.00499163	0.0373442	0.893667	0.995021	0.924792	1.07058	NA	NA	NA	NA
Immature Myeloid-Derived Suppressor Cells %CD33dim HLA DR- CD66b- || id:ebi-a-GCST90001516	Inflammatory bowel disease	Inverse variance weighted	13	-0.056385	0.0381606	0.139522	0.945175	0.87706	1.01858	23.5978	0.0230589	-0.0152037	0.59084
Immature Myeloid-Derived Suppressor Cells %CD33dim HLA DR- CD66b- || id:ebi-a-GCST90001516	Inflammatory bowel disease	MR Egger	13	0.00414193	0.116162	0.972195	1.00415	0.799686	1.26089	22.9579	0.0179186	NA	NA
Immature Myeloid-Derived Suppressor Cells %CD33dim HLA DR- CD66b- || id:ebi-a-GCST90001516	Inflammatory bowel disease	Weighted median	13	0.0033553	0.039155	0.93171	1.00336	0.92924	1.08339	NA	NA	NA	NA
CD33+ HLA DR+ Absolute Count || id:ebi-a-GCST90001517	Inflammatory bowel disease	Inverse variance weighted	17	0.0250057	0.0259426	0.335104	1.02532	0.974489	1.0788	15.8489	0.463554	-0.0181631	0.334878
CD33+ HLA DR+ Absolute Count || id:ebi-a-GCST90001517	Inflammatory bowel disease	MR Egger	17	0.109411	0.0885968	0.235852	1.11562	0.937781	1.32719	14.8562	0.461825	NA	NA
CD33+ HLA DR+ Absolute Count || id:ebi-a-GCST90001517	Inflammatory bowel disease	Weighted median	17	0.0533349	0.0374901	0.15484	1.05478	0.980056	1.13521	NA	NA	NA	NA
CD33+ HLA DR+ CD14- Absolute Count || id:ebi-a-GCST90001518	Inflammatory bowel disease	Inverse variance weighted	14	0.060861	0.0283351	0.0317217	1.06275	1.00534	1.12344	14.0942	0.367241	-0.0340104	0.077641
CD33+ HLA DR+ CD14- Absolute Count || id:ebi-a-GCST90001518	Inflammatory bowel disease	MR Egger	14	0.211321	0.0825885	0.0250603	1.23531	1.05069	1.45237	10.371	0.583445	NA	NA
CD33+ HLA DR+ CD14- Absolute Count || id:ebi-a-GCST90001518	Inflammatory bowel disease	Weighted median	14	0.0663597	0.0386779	0.0862166	1.06861	0.990596	1.15277	NA	NA	NA	NA
CD33+ HLA DR+ CD14- %CD33+ HLA DR+ || id:ebi-a-GCST90001519	Inflammatory bowel disease	Inverse variance weighted	14	-0.0102262	0.0375689	0.78547	0.989826	0.919559	1.06546	22.505	0.048014	-0.0108895	0.747452
CD33+ HLA DR+ CD14- %CD33+ HLA DR+ || id:ebi-a-GCST90001519	Inflammatory bowel disease	MR Egger	14	0.036048	0.14573	0.808809	1.03671	0.779126	1.37944	22.3032	0.0342586	NA	NA
CD33+ HLA DR+ CD14- %CD33+ HLA DR+ || id:ebi-a-GCST90001519	Inflammatory bowel disease	Weighted median	14	-0.036427	0.0399754	0.362171	0.964228	0.891563	1.04282	NA	NA	NA	NA
CD33+ HLA DR+ CD14dim Absolute Count || id:ebi-a-GCST90001520	Inflammatory bowel disease	Inverse variance weighted	16	0.016668	0.0281732	0.554101	1.01681	0.962182	1.07453	13.1471	0.590934	0.000805622	0.971553
CD33+ HLA DR+ CD14dim Absolute Count || id:ebi-a-GCST90001520	Inflammatory bowel disease	MR Egger	16	0.0132117	0.0992846	0.896032	1.0133	0.834113	1.23098	13.1458	0.515075	NA	NA
CD33+ HLA DR+ CD14dim Absolute Count || id:ebi-a-GCST90001520	Inflammatory bowel disease	Weighted median	16	0.0518769	0.0376437	0.168172	1.05325	0.978333	1.13389	NA	NA	NA	NA
CD33+ HLA DR+ CD14dim %CD33+ HLA DR+ || id:ebi-a-GCST90001521	Inflammatory bowel disease	Inverse variance weighted	17	0.0377379	0.0477777	0.429607	1.03846	0.945628	1.1404	49.303	2.96e-05	-0.0100317	0.800766
CD33+ HLA DR+ CD14dim %CD33+ HLA DR+ || id:ebi-a-GCST90001521	Inflammatory bowel disease	MR Egger	17	0.0907938	0.212332	0.675015	1.09504	0.722255	1.66024	49.0871	1.7e-05	NA	NA
CD33+ HLA DR+ CD14dim %CD33+ HLA DR+ || id:ebi-a-GCST90001521	Inflammatory bowel disease	Weighted median	17	0.0644611	0.0420022	0.124856	1.06658	0.982295	1.15811	NA	NA	NA	NA
CD33- HLA DR- Absolute Count || id:ebi-a-GCST90001522	Inflammatory bowel disease	Inverse variance weighted	14	-0.0154502	0.0331439	0.641104	0.984669	0.922736	1.05076	19.7579	0.101412	-0.0110538	0.701467
CD33- HLA DR- Absolute Count || id:ebi-a-GCST90001522	Inflammatory bowel disease	MR Egger	14	0.0246586	0.107748	0.822836	1.02497	0.829836	1.26598	19.5073	0.0769987	NA	NA
CD33- HLA DR- Absolute Count || id:ebi-a-GCST90001522	Inflammatory bowel disease	Weighted median	14	-0.0494176	0.0378611	0.191813	0.951784	0.883711	1.0251	NA	NA	NA	NA
CD33- HLA DR+ Absolute Count || id:ebi-a-GCST90001523	Inflammatory bowel disease	Inverse variance weighted	14	-0.0781547	0.0471553	0.0974404	0.924821	0.843176	1.01437	32.7244	0.001874	-0.0293524	0.525702
CD33- HLA DR+ Absolute Count || id:ebi-a-GCST90001523	Inflammatory bowel disease	MR Egger	14	0.0605559	0.21764	0.785565	1.06243	0.69349	1.62764	31.5995	0.00159489	NA	NA
CD33- HLA DR+ Absolute Count || id:ebi-a-GCST90001523	Inflammatory bowel disease	Weighted median	14	-0.0263648	0.0487724	0.588805	0.97398	0.885185	1.07168	NA	NA	NA	NA
Granulocytic Myeloid-Derived Suppressor Cells Absolute Count || id:ebi-a-GCST90001524	Inflammatory bowel disease	Inverse variance weighted	15	0.0305766	0.0281917	0.278102	1.03105	0.975623	1.08962	5.304	0.981116	-0.00601998	0.755937
Granulocytic Myeloid-Derived Suppressor Cells Absolute Count || id:ebi-a-GCST90001524	Inflammatory bowel disease	MR Egger	15	0.0574742	0.089295	0.530998	1.05916	0.889101	1.26174	5.20322	0.970443	NA	NA
Granulocytic Myeloid-Derived Suppressor Cells Absolute Count || id:ebi-a-GCST90001524	Inflammatory bowel disease	Weighted median	15	0.0195882	0.0375814	0.602214	1.01978	0.947364	1.09773	NA	NA	NA	NA
CD33dim HLA DR+ CD11b+ Absolute Count || id:ebi-a-GCST90001525	Inflammatory bowel disease	Inverse variance weighted	16	-0.0592367	0.0589169	0.314691	0.942484	0.839697	1.05785	72.539	1.57e-09	0.0409962	0.402908
CD33dim HLA DR+ CD11b+ Absolute Count || id:ebi-a-GCST90001525	Inflammatory bowel disease	MR Egger	16	-0.248727	0.227577	0.292872	0.779792	0.499185	1.21814	68.8785	3.08e-09	NA	NA
CD33dim HLA DR+ CD11b+ Absolute Count || id:ebi-a-GCST90001525	Inflammatory bowel disease	Weighted median	16	0.0449445	0.0459205	0.327705	1.04597	0.95594	1.14448	NA	NA	NA	NA
CD33dim HLA DR+ CD11b+ %CD33dim HLA DR+ || id:ebi-a-GCST90001526	Inflammatory bowel disease	Inverse variance weighted	17	-0.0986714	0.0350079	0.00482412	0.90604	0.845957	0.970391	51.2742	1.43e-05	0.0558809	0.00974152
CD33dim HLA DR+ CD11b+ %CD33dim HLA DR+ || id:ebi-a-GCST90001526	Inflammatory bowel disease	MR Egger	17	-0.269742	0.0645474	0.000806456	0.763577	0.672835	0.866556	32.3711	0.0057291	NA	NA
CD33dim HLA DR+ CD11b+ %CD33dim HLA DR+ || id:ebi-a-GCST90001526	Inflammatory bowel disease	Weighted median	17	-0.0956156	0.0424274	0.0242198	0.908813	0.836295	0.98762	NA	NA	NA	NA
CD33dim HLA DR+ CD11b- Absolute Count || id:ebi-a-GCST90001527	Inflammatory bowel disease	Inverse variance weighted	16	0.0298722	0.0610441	0.624591	1.03032	0.914138	1.16128	82.6944	2.24e-11	-0.00198609	0.959804
CD33dim HLA DR+ CD11b- Absolute Count || id:ebi-a-GCST90001527	Inflammatory bowel disease	MR Egger	16	0.0394062	0.196261	0.843755	1.04019	0.708032	1.52818	82.6789	8.98e-12	NA	NA
CD33dim HLA DR+ CD11b- Absolute Count || id:ebi-a-GCST90001527	Inflammatory bowel disease	Weighted median	16	-0.0230602	0.0377282	0.541056	0.977204	0.907549	1.0522	NA	NA	NA	NA
CD33dim HLA DR+ CD11b- %CD33dim HLA DR+ || id:ebi-a-GCST90001528	Inflammatory bowel disease	Inverse variance weighted	15	0.136735	0.0311952	1.17e-05	1.14652	1.07852	1.21881	32.6897	0.00319295	-0.0403849	0.0330716
CD33dim HLA DR+ CD11b- %CD33dim HLA DR+ || id:ebi-a-GCST90001528	Inflammatory bowel disease	MR Egger	15	0.259492	0.0581471	0.000639565	1.29627	1.15664	1.45275	22.7467	0.0448188	NA	NA
CD33dim HLA DR+ CD11b- %CD33dim HLA DR+ || id:ebi-a-GCST90001528	Inflammatory bowel disease	Weighted median	15	0.1628	0.0369493	1.05e-05	1.1768	1.09459	1.26519	NA	NA	NA	NA
CD66b++ myeloid cell Absolute Count || id:ebi-a-GCST90001529	Inflammatory bowel disease	Inverse variance weighted	14	0.000370635	0.0304186	0.990278	1.00037	0.942471	1.06183	9.7864	0.711301	-0.0137842	0.61393
CD66b++ myeloid cell Absolute Count || id:ebi-a-GCST90001529	Inflammatory bowel disease	MR Egger	14	0.0653078	0.129018	0.621893	1.06749	0.828973	1.37463	9.51816	0.658151	NA	NA
CD66b++ myeloid cell Absolute Count || id:ebi-a-GCST90001529	Inflammatory bowel disease	Weighted median	14	0.013935	0.0411737	0.735029	1.01403	0.935415	1.09926	NA	NA	NA	NA
Monocytic Myeloid-Derived Suppressor Cells Absolute Count || id:ebi-a-GCST90001530	Inflammatory bowel disease	Inverse variance weighted	14	-0.0653379	0.0604606	0.279844	0.936751	0.832068	1.0546	105.382	1.49e-16	0.0179846	0.689309
Monocytic Myeloid-Derived Suppressor Cells Absolute Count || id:ebi-a-GCST90001530	Inflammatory bowel disease	MR Egger	14	-0.12846	0.166292	0.454767	0.879449	0.634834	1.21832	103.929	9.43e-17	NA	NA
Monocytic Myeloid-Derived Suppressor Cells Absolute Count || id:ebi-a-GCST90001530	Inflammatory bowel disease	Weighted median	14	0.0364418	0.0329527	0.268777	1.03711	0.972247	1.10631	NA	NA	NA	NA
CD33dim HLA DR- Absolute Count || id:ebi-a-GCST90001531	Inflammatory bowel disease	Inverse variance weighted	12	0.0537004	0.043571	0.217771	1.05517	0.968798	1.14924	29.86	0.0016668	0.0193496	0.429169
CD33dim HLA DR- Absolute Count || id:ebi-a-GCST90001531	Inflammatory bowel disease	MR Egger	12	-0.0190461	0.0987429	0.85091	0.981134	0.808494	1.19064	27.9616	0.00183099	NA	NA
CD33dim HLA DR- Absolute Count || id:ebi-a-GCST90001531	Inflammatory bowel disease	Weighted median	12	0.0446224	0.0366404	0.223282	1.04563	0.973174	1.12349	NA	NA	NA	NA
Basophil Absolute Count || id:ebi-a-GCST90001532	Inflammatory bowel disease	Inverse variance weighted	14	0.0609834	0.0405781	0.132874	1.06288	0.981621	1.15087	36.2232	0.000547814	0.0289101	0.181866
Basophil Absolute Count || id:ebi-a-GCST90001532	Inflammatory bowel disease	MR Egger	14	-0.0501514	0.0876223	0.577645	0.951085	0.801003	1.12929	31.0298	0.00194952	NA	NA
Basophil Absolute Count || id:ebi-a-GCST90001532	Inflammatory bowel disease	Weighted median	14	0.0408602	0.036047	0.256994	1.04171	0.970647	1.11797	NA	NA	NA	NA
Basophil %CD33dim HLA DR- CD66b- || id:ebi-a-GCST90001533	Inflammatory bowel disease	Inverse variance weighted	16	0.0407718	0.0262009	0.11968	1.04161	0.989474	1.0965	20.2309	0.163253	-0.0172874	0.254143
Basophil %CD33dim HLA DR- CD66b- || id:ebi-a-GCST90001533	Inflammatory bowel disease	MR Egger	16	0.105074	0.059932	0.101422	1.11079	0.987684	1.24925	18.3748	0.19024	NA	NA
Basophil %CD33dim HLA DR- CD66b- || id:ebi-a-GCST90001533	Inflammatory bowel disease	Weighted median	16	0.052305	0.0318793	0.100856	1.0537	0.989873	1.12164	NA	NA	NA	NA
CD45RA- CD4+ T cell Absolute Count || id:ebi-a-GCST90001534	Inflammatory bowel disease	Inverse variance weighted	11	0.0803994	0.0660949	0.223823	1.08372	0.952042	1.23361	28.5307	0.00148357	0.0206874	0.63658
CD45RA- CD4+ T cell Absolute Count || id:ebi-a-GCST90001534	Inflammatory bowel disease	MR Egger	11	-0.0291705	0.234411	0.903701	0.971251	0.613475	1.53768	27.7925	0.00103305	NA	NA
CD45RA- CD4+ T cell Absolute Count || id:ebi-a-GCST90001534	Inflammatory bowel disease	Weighted median	11	0.0293038	0.0618052	0.635407	1.02974	0.912256	1.16235	NA	NA	NA	NA
CD45RA- CD4+ T cell %CD4+ T cell || id:ebi-a-GCST90001535	Inflammatory bowel disease	Inverse variance weighted	18	0.0104782	0.0369999	0.777027	1.01053	0.939844	1.08654	19.6247	0.293876	0.000569418	0.978656
CD45RA- CD4+ T cell %CD4+ T cell || id:ebi-a-GCST90001535	Inflammatory bowel disease	MR Egger	18	0.00683337	0.13944	0.961521	1.00686	0.766079	1.32331	19.6238	0.237647	NA	NA
CD45RA- CD4+ T cell %CD4+ T cell || id:ebi-a-GCST90001535	Inflammatory bowel disease	Weighted median	18	-0.00921035	0.04937	0.852008	0.990832	0.899447	1.0915	NA	NA	NA	NA
CD45RA- CD4+ T cell %T cell || id:ebi-a-GCST90001536	Inflammatory bowel disease	Inverse variance weighted	13	-0.00261456	0.0487199	0.957202	0.997389	0.906553	1.09733	15.739	0.203485	0.00304548	0.935982
CD45RA- CD4+ T cell %T cell || id:ebi-a-GCST90001536	Inflammatory bowel disease	MR Egger	13	-0.0226855	0.249482	0.929183	0.97757	0.599493	1.59408	15.7293	0.15148	NA	NA
CD45RA- CD4+ T cell %T cell || id:ebi-a-GCST90001536	Inflammatory bowel disease	Weighted median	13	-0.0801963	0.060558	0.185407	0.922935	0.81964	1.03925	NA	NA	NA	NA
Central Memory CD4+ T cell Absolute Count || id:ebi-a-GCST90001537	Inflammatory bowel disease	Inverse variance weighted	17	0.0408259	0.0695113	0.556983	1.04167	0.908995	1.19371	49.1722	3.1e-05	-0.00768783	0.859261
Central Memory CD4+ T cell Absolute Count || id:ebi-a-GCST90001537	Inflammatory bowel disease	MR Egger	17	0.084999	0.255161	0.743655	1.08872	0.660264	1.7952	49.0658	1.71e-05	NA	NA
Central Memory CD4+ T cell Absolute Count || id:ebi-a-GCST90001537	Inflammatory bowel disease	Weighted median	17	0.00587762	0.0701583	0.933234	1.00589	0.876663	1.15418	NA	NA	NA	NA
Central Memory CD4+ T cell %CD4+ T cell || id:ebi-a-GCST90001538	Inflammatory bowel disease	Inverse variance weighted	20	-0.0116248	0.0311184	0.708728	0.988443	0.929957	1.05061	20.1279	0.386917	-0.0201082	0.25904
Central Memory CD4+ T cell %CD4+ T cell || id:ebi-a-GCST90001538	Inflammatory bowel disease	MR Egger	20	0.0972917	0.0984064	0.335928	1.10218	0.908841	1.33665	18.7156	0.40953	NA	NA
Central Memory CD4+ T cell %CD4+ T cell || id:ebi-a-GCST90001538	Inflammatory bowel disease	Weighted median	20	-0.00101746	0.0417727	0.980568	0.998983	0.920451	1.08422	NA	NA	NA	NA
Central Memory CD4+ T cell %T cell || id:ebi-a-GCST90001539	Inflammatory bowel disease	Inverse variance weighted	20	-0.0311755	0.045658	0.49473	0.969305	0.886331	1.06005	35.9895	0.0105869	-0.0446979	0.117932
Central Memory CD4+ T cell %T cell || id:ebi-a-GCST90001539	Inflammatory bowel disease	MR Egger	20	0.259703	0.182464	0.171749	1.29654	0.906715	1.85398	31.3007	0.0265643	NA	NA
Central Memory CD4+ T cell %T cell || id:ebi-a-GCST90001539	Inflammatory bowel disease	Weighted median	20	0.00889246	0.0499358	0.858662	1.00893	0.914862	1.11267	NA	NA	NA	NA
Naive CD4+ T cell Absolute Count || id:ebi-a-GCST90001540	Inflammatory bowel disease	Inverse variance weighted	18	-0.0442227	0.0712587	0.534867	0.956741	0.832027	1.10015	70.4763	1.79e-08	0.0239649	0.494879
Naive CD4+ T cell Absolute Count || id:ebi-a-GCST90001540	Inflammatory bowel disease	MR Egger	18	-0.172661	0.197595	0.395148	0.841423	0.571239	1.2394	68.3907	1.91e-08	NA	NA
Naive CD4+ T cell Absolute Count || id:ebi-a-GCST90001540	Inflammatory bowel disease	Weighted median	18	0.00795616	0.056812	0.888625	1.00799	0.90177	1.12672	NA	NA	NA	NA
Naive CD4+ T cell %CD4+ T cell || id:ebi-a-GCST90001541	Inflammatory bowel disease	Inverse variance weighted	23	-2.5e-05	0.0322715	0.999383	0.999975	0.938683	1.06527	18.8005	0.657612	-0.00916095	0.553642
Naive CD4+ T cell %CD4+ T cell || id:ebi-a-GCST90001541	Inflammatory bowel disease	MR Egger	23	0.0582484	0.102043	0.574177	1.05998	0.867834	1.29467	18.4382	0.621132	NA	NA
Naive CD4+ T cell %CD4+ T cell || id:ebi-a-GCST90001541	Inflammatory bowel disease	Weighted median	23	0.00686099	0.0446831	0.877966	1.00688	0.922454	1.09904	NA	NA	NA	NA
Effector Memory CD4+ T cell Absolute Count || id:ebi-a-GCST90001542	Inflammatory bowel disease	Inverse variance weighted	11	0.0291821	0.0715344	0.683314	1.02961	0.894916	1.18458	23.1091	0.010351	-0.0416776	0.43386
Effector Memory CD4+ T cell Absolute Count || id:ebi-a-GCST90001542	Inflammatory bowel disease	MR Egger	11	0.209056	0.231324	0.389682	1.23251	0.783223	1.93954	21.5057	0.0105846	NA	NA
Effector Memory CD4+ T cell Absolute Count || id:ebi-a-GCST90001542	Inflammatory bowel disease	Weighted median	11	0.105987	0.0680538	0.119377	1.11181	0.972973	1.27045	NA	NA	NA	NA
Effector Memory CD4+ T cell %CD4+ T cell || id:ebi-a-GCST90001543	Inflammatory bowel disease	Inverse variance weighted	17	-0.00581453	0.0420372	0.889988	0.994202	0.915571	1.07959	19.3745	0.249724	0.00415619	0.854941
Effector Memory CD4+ T cell %CD4+ T cell || id:ebi-a-GCST90001543	Inflammatory bowel disease	MR Egger	17	-0.0296736	0.13541	0.829496	0.970762	0.744474	1.26583	19.3299	0.199173	NA	NA
Effector Memory CD4+ T cell %CD4+ T cell || id:ebi-a-GCST90001543	Inflammatory bowel disease	Weighted median	17	-0.0163184	0.0555911	0.769107	0.983814	0.882252	1.09707	NA	NA	NA	NA
Effector Memory CD4+ T cell %T cell || id:ebi-a-GCST90001544	Inflammatory bowel disease	Inverse variance weighted	12	0.0479354	0.0433907	0.269272	1.0491	0.96357	1.14223	4.47799	0.953797	0.0238765	0.32988
Effector Memory CD4+ T cell %T cell || id:ebi-a-GCST90001544	Inflammatory bowel disease	MR Egger	12	-0.083522	0.135488	0.551369	0.919871	0.705338	1.19965	3.42901	0.969454	NA	NA
Effector Memory CD4+ T cell %T cell || id:ebi-a-GCST90001544	Inflammatory bowel disease	Weighted median	12	0.00409087	0.0560584	0.941826	1.0041	0.899619	1.12071	NA	NA	NA	NA
Terminally Differentiated CD4+ T cell Absolute Count || id:ebi-a-GCST90001545	Inflammatory bowel disease	Inverse variance weighted	7	0.00105979	0.0782335	0.989192	1.00106	0.85875	1.16695	16.389	0.0118115	0.00386201	0.952633
Terminally Differentiated CD4+ T cell Absolute Count || id:ebi-a-GCST90001545	Inflammatory bowel disease	MR Egger	7	-0.0181044	0.318662	0.956894	0.982059	0.52588	1.83395	16.3762	0.00584809	NA	NA
Terminally Differentiated CD4+ T cell Absolute Count || id:ebi-a-GCST90001545	Inflammatory bowel disease	Weighted median	7	-0.0690176	0.0704101	0.326976	0.93331	0.813002	1.07142	NA	NA	NA	NA
Terminally Differentiated CD4+ T cell %CD4+ T cell || id:ebi-a-GCST90001546	Inflammatory bowel disease	Inverse variance weighted	13	0.0547316	0.0538979	0.309882	1.05626	0.950366	1.17395	20.6104	0.056385	-0.0259464	0.387854
Terminally Differentiated CD4+ T cell %CD4+ T cell || id:ebi-a-GCST90001546	Inflammatory bowel disease	MR Egger	13	0.228853	0.201138	0.279384	1.25716	0.847574	1.86467	19.1994	0.0576063	NA	NA
Terminally Differentiated CD4+ T cell %CD4+ T cell || id:ebi-a-GCST90001546	Inflammatory bowel disease	Weighted median	13	0.0562313	0.0625369	0.368562	1.05784	0.935812	1.19579	NA	NA	NA	NA
Terminally Differentiated CD4+ T cell %T cell || id:ebi-a-GCST90001547	Inflammatory bowel disease	Inverse variance weighted	16	0.111992	0.0506289	0.0269656	1.1185	1.01284	1.23519	22.2489	0.101441	-0.0321873	0.228793
Terminally Differentiated CD4+ T cell %T cell || id:ebi-a-GCST90001547	Inflammatory bowel disease	MR Egger	16	0.332752	0.182312	0.0893792	1.3948	0.975721	1.99388	19.9877	0.13053	NA	NA
Terminally Differentiated CD4+ T cell %T cell || id:ebi-a-GCST90001547	Inflammatory bowel disease	Weighted median	16	0.152344	0.0637851	0.0169223	1.16456	1.0277	1.31964	NA	NA	NA	NA
Central Memory CD8+ T cell Absolute Count || id:ebi-a-GCST90001548	Inflammatory bowel disease	Inverse variance weighted	20	0.014913	0.0405717	0.713193	1.01502	0.937435	1.09904	22.272	0.270928	0.0475822	0.0315005
Central Memory CD8+ T cell Absolute Count || id:ebi-a-GCST90001548	Inflammatory bowel disease	MR Egger	20	-0.240973	0.115941	0.0522496	0.785863	0.626118	0.986365	16.8328	0.534629	NA	NA
Central Memory CD8+ T cell Absolute Count || id:ebi-a-GCST90001548	Inflammatory bowel disease	Weighted median	20	0.0098235	0.0551943	0.858738	1.00987	0.906325	1.12525	NA	NA	NA	NA
Central Memory CD8+ T cell %CD8+ T cell || id:ebi-a-GCST90001549	Inflammatory bowel disease	Inverse variance weighted	24	-0.0101031	0.0302007	0.737979	0.989948	0.93305	1.05032	17.9353	0.760989	0.00508158	0.739195
Central Memory CD8+ T cell %CD8+ T cell || id:ebi-a-GCST90001549	Inflammatory bowel disease	MR Egger	24	-0.0395775	0.0924903	0.672877	0.961195	0.80183	1.15223	17.8216	0.716509	NA	NA
Central Memory CD8+ T cell %CD8+ T cell || id:ebi-a-GCST90001549	Inflammatory bowel disease	Weighted median	24	-0.0170616	0.0409589	0.677004	0.983083	0.907247	1.06526	NA	NA	NA	NA
Central Memory CD8+ T cell %T cell || id:ebi-a-GCST90001550	Inflammatory bowel disease	Inverse variance weighted	16	0.00730046	0.0458009	0.873357	1.00733	0.92084	1.10194	19.593	0.188108	0.0250874	0.296735
Central Memory CD8+ T cell %T cell || id:ebi-a-GCST90001550	Inflammatory bowel disease	MR Egger	16	-0.148266	0.150579	0.341512	0.862202	0.64185	1.1582	18.0762	0.203334	NA	NA
Central Memory CD8+ T cell %T cell || id:ebi-a-GCST90001550	Inflammatory bowel disease	Weighted median	16	-0.013453	0.056568	0.812021	0.986637	0.883092	1.10232	NA	NA	NA	NA
Naive CD8+ T cell Absolute Count || id:ebi-a-GCST90001551	Inflammatory bowel disease	Inverse variance weighted	17	-0.131098	0.0936076	0.161361	0.877132	0.730103	1.05377	56.0055	2.43e-06	0.0542445	0.183358
Naive CD8+ T cell Absolute Count || id:ebi-a-GCST90001551	Inflammatory bowel disease	MR Egger	17	-0.54907	0.313143	0.0999353	0.577487	0.3126	1.06683	49.5748	1.41e-05	NA	NA
Naive CD8+ T cell Absolute Count || id:ebi-a-GCST90001551	Inflammatory bowel disease	Weighted median	17	-0.0347218	0.0759614	0.647601	0.965874	0.832264	1.12093	NA	NA	NA	NA
Naive CD8+ T cell %CD8+ T cell || id:ebi-a-GCST90001552	Inflammatory bowel disease	Inverse variance weighted	18	-0.0684021	0.0455728	0.133371	0.933885	0.854085	1.02114	11.9821	0.801222	0.0206248	0.297937
Naive CD8+ T cell %CD8+ T cell || id:ebi-a-GCST90001552	Inflammatory bowel disease	MR Egger	18	-0.239668	0.165582	0.167086	0.786889	0.568811	1.08858	10.8245	0.820183	NA	NA
Naive CD8+ T cell %CD8+ T cell || id:ebi-a-GCST90001552	Inflammatory bowel disease	Weighted median	18	-0.0996893	0.0628495	0.112703	0.905119	0.800215	1.02377	NA	NA	NA	NA
Naive CD8+ T cell %T cell || id:ebi-a-GCST90001553	Inflammatory bowel disease	Inverse variance weighted	19	-0.0420429	0.0505638	0.405701	0.958829	0.868361	1.05872	16.3552	0.567774	0.0389499	0.129805
Naive CD8+ T cell %T cell || id:ebi-a-GCST90001553	Inflammatory bowel disease	MR Egger	19	-0.401408	0.231325	0.100785	0.669377	0.425366	1.05336	13.8207	0.679752	NA	NA
Naive CD8+ T cell %T cell || id:ebi-a-GCST90001553	Inflammatory bowel disease	Weighted median	19	-0.00860907	0.0687455	0.900341	0.991428	0.866451	1.13443	NA	NA	NA	NA
Effector Memory CD8+ T cell Absolute Count || id:ebi-a-GCST90001554	Inflammatory bowel disease	Inverse variance weighted	16	0.0551708	0.0360194	0.125598	1.05672	0.984691	1.13402	6.9177	0.959893	-0.00615497	0.75773
Effector Memory CD8+ T cell Absolute Count || id:ebi-a-GCST90001554	Inflammatory bowel disease	MR Egger	16	0.0930659	0.125738	0.471434	1.09753	0.857804	1.40426	6.81875	0.941473	NA	NA
Effector Memory CD8+ T cell Absolute Count || id:ebi-a-GCST90001554	Inflammatory bowel disease	Weighted median	16	0.061009	0.0470668	0.194899	1.06291	0.969241	1.16563	NA	NA	NA	NA
Effector Memory CD8+ T cell %CD8+ T cell || id:ebi-a-GCST90001555	Inflammatory bowel disease	Inverse variance weighted	13	0.0118405	0.044597	0.790625	1.01191	0.927215	1.10434	13.7291	0.318339	0.0340082	0.151881
Effector Memory CD8+ T cell %CD8+ T cell || id:ebi-a-GCST90001555	Inflammatory bowel disease	MR Egger	13	-0.201766	0.14502	0.191632	0.817286	0.615078	1.08597	11.2948	0.418907	NA	NA
Effector Memory CD8+ T cell %CD8+ T cell || id:ebi-a-GCST90001555	Inflammatory bowel disease	Weighted median	13	-0.0115729	0.0615975	0.850971	0.988494	0.876075	1.11534	NA	NA	NA	NA
Effector Memory CD8+ T cell %T cell || id:ebi-a-GCST90001556	Inflammatory bowel disease	Inverse variance weighted	7	0.0197751	0.049899	0.691882	1.01997	0.924939	1.12477	7.37447	0.2876	-0.0478048	0.222859
Effector Memory CD8+ T cell %T cell || id:ebi-a-GCST90001556	Inflammatory bowel disease	MR Egger	7	0.257789	0.177254	0.2056	1.29407	0.91427	1.83163	5.31625	0.378515	NA	NA
Effector Memory CD8+ T cell %T cell || id:ebi-a-GCST90001556	Inflammatory bowel disease	Weighted median	7	0.0368035	0.0547877	0.501745	1.03749	0.931853	1.1551	NA	NA	NA	NA
Terminally Differentiated CD8+ T cell Absolute Count || id:ebi-a-GCST90001557	Inflammatory bowel disease	Inverse variance weighted	12	0.000932031	0.0514457	0.985546	1.00093	0.904927	1.10712	14.5974	0.20168	-0.012084	0.767288
Terminally Differentiated CD8+ T cell Absolute Count || id:ebi-a-GCST90001557	Inflammatory bowel disease	MR Egger	12	0.0609571	0.204565	0.771814	1.06285	0.711777	1.58709	14.4636	0.152874	NA	NA
Terminally Differentiated CD8+ T cell Absolute Count || id:ebi-a-GCST90001557	Inflammatory bowel disease	Weighted median	12	0.00969828	0.065039	0.881463	1.00975	0.888893	1.14703	NA	NA	NA	NA
Terminally Differentiated CD8+ T cell %CD8+ T cell || id:ebi-a-GCST90001558	Inflammatory bowel disease	Inverse variance weighted	14	-0.0460663	0.0523279	0.378676	0.954979	0.861889	1.05812	23.7538	0.0334721	-0.0140286	0.7347
Terminally Differentiated CD8+ T cell %CD8+ T cell || id:ebi-a-GCST90001558	Inflammatory bowel disease	MR Egger	14	0.0254675	0.213231	0.906906	1.02579	0.675389	1.558	23.518	0.023637	NA	NA
Terminally Differentiated CD8+ T cell %CD8+ T cell || id:ebi-a-GCST90001558	Inflammatory bowel disease	Weighted median	14	-0.0384137	0.0527388	0.466383	0.962315	0.867811	1.06711	NA	NA	NA	NA
Terminally Differentiated CD8+ T cell %T cell || id:ebi-a-GCST90001559	Inflammatory bowel disease	Inverse variance weighted	13	0.0341294	0.04538	0.452003	1.03472	0.94666	1.13097	15.5908	0.210704	0.042154	0.134653
Terminally Differentiated CD8+ T cell %T cell || id:ebi-a-GCST90001559	Inflammatory bowel disease	MR Egger	13	-0.207791	0.155759	0.209149	0.812377	0.598649	1.10241	12.6033	0.320044	NA	NA
Terminally Differentiated CD8+ T cell %T cell || id:ebi-a-GCST90001559	Inflammatory bowel disease	Weighted median	13	-0.000184054	0.0565331	0.997402	0.999816	0.894949	1.11697	NA	NA	NA	NA
CD45RA+ CD8+ T cell Absolute Count || id:ebi-a-GCST90001560	Inflammatory bowel disease	Inverse variance weighted	14	-0.00429027	0.057282	0.940296	0.995719	0.889974	1.11403	20.8557	0.0758325	0.029383	0.424419
CD45RA+ CD8+ T cell Absolute Count || id:ebi-a-GCST90001560	Inflammatory bowel disease	MR Egger	14	-0.201645	0.245607	0.42765	0.817385	0.505082	1.32279	19.7313	0.0723422	NA	NA
CD45RA+ CD8+ T cell Absolute Count || id:ebi-a-GCST90001560	Inflammatory bowel disease	Weighted median	14	0.0175769	0.0652881	0.78776	1.01773	0.895487	1.15667	NA	NA	NA	NA
CD45RA+ CD8+ T cell %CD8+ T cell || id:ebi-a-GCST90001561	Inflammatory bowel disease	Inverse variance weighted	8	0.034733	0.063334	0.58341	1.03534	0.914478	1.17218	12.5893	0.0827705	-0.0372364	0.275356
CD45RA+ CD8+ T cell %CD8+ T cell || id:ebi-a-GCST90001561	Inflammatory bowel disease	MR Egger	8	0.251345	0.190672	0.235523	1.28575	0.884818	1.86836	10.1525	0.118373	NA	NA
CD45RA+ CD8+ T cell %CD8+ T cell || id:ebi-a-GCST90001561	Inflammatory bowel disease	Weighted median	8	0.0316027	0.0666315	0.635292	1.03211	0.905747	1.1761	NA	NA	NA	NA
CD45RA+ CD8+ T cell %T cell || id:ebi-a-GCST90001562	Inflammatory bowel disease	Inverse variance weighted	13	0.00243275	0.0679811	0.971453	1.00244	0.877384	1.14531	22.7452	0.0299689	-0.0638335	0.0474707
CD45RA+ CD8+ T cell %T cell || id:ebi-a-GCST90001562	Inflammatory bowel disease	MR Egger	13	0.428565	0.199913	0.0552429	1.53505	1.03742	2.27139	15.6609	0.154194	NA	NA
CD45RA+ CD8+ T cell %T cell || id:ebi-a-GCST90001562	Inflammatory bowel disease	Weighted median	13	0.0530947	0.0722909	0.462669	1.05453	0.915216	1.21505	NA	NA	NA	NA
Central Memory CD4-CD8- T cell Absolute Count || id:ebi-a-GCST90001563	Inflammatory bowel disease	Inverse variance weighted	2	-0.253225	0.151064	0.0936846	0.776293	0.577348	1.04379	0.393893	0.53026	NA	NA
Central Memory CD4-CD8- T cell %CD4-CD8- T cell || id:ebi-a-GCST90001564	Inflammatory bowel disease	Inverse variance weighted	11	-0.0541062	0.082976	0.514356	0.947332	0.80514	1.11463	25.6115	0.00429931	-0.0220907	0.625197
Central Memory CD4-CD8- T cell %CD4-CD8- T cell || id:ebi-a-GCST90001564	Inflammatory bowel disease	MR Egger	11	0.0908011	0.299228	0.768444	1.09505	0.609153	1.96853	24.9038	0.00307944	NA	NA
Central Memory CD4-CD8- T cell %CD4-CD8- T cell || id:ebi-a-GCST90001564	Inflammatory bowel disease	Weighted median	11	0.014688	0.071024	0.836164	1.0148	0.882921	1.16637	NA	NA	NA	NA
Central Memory CD4-CD8- T cell %T cell || id:ebi-a-GCST90001565	Inflammatory bowel disease	Inverse variance weighted	9	-0.00526912	0.0686796	0.938846	0.994745	0.869462	1.13808	13.9709	0.0825262	-0.0631426	0.0480302
Central Memory CD4-CD8- T cell %T cell || id:ebi-a-GCST90001565	Inflammatory bowel disease	MR Egger	9	0.396148	0.176436	0.0596115	1.48609	1.05162	2.10005	7.68751	0.360953	NA	NA
Central Memory CD4-CD8- T cell %T cell || id:ebi-a-GCST90001565	Inflammatory bowel disease	Weighted median	9	0.000832159	0.0765166	0.991323	1.00083	0.861448	1.16277	NA	NA	NA	NA
Naive CD4-CD8- T cell Absolute Count || id:ebi-a-GCST90001566	Inflammatory bowel disease	Inverse variance weighted	12	0.0229997	0.0706108	0.744633	1.02327	0.891012	1.17515	18.8457	0.0639199	0.0056819	0.874156
Naive CD4-CD8- T cell Absolute Count || id:ebi-a-GCST90001566	Inflammatory bowel disease	MR Egger	12	-0.0170289	0.257208	0.948518	0.983115	0.593834	1.62759	18.7961	0.0429305	NA	NA
Naive CD4-CD8- T cell Absolute Count || id:ebi-a-GCST90001566	Inflammatory bowel disease	Weighted median	12	0.00370113	0.078124	0.962214	1.00371	0.861206	1.16979	NA	NA	NA	NA
Naive CD4-CD8- T cell %CD4-CD8- T cell || id:ebi-a-GCST90001567	Inflammatory bowel disease	Inverse variance weighted	13	-0.0505967	0.0801606	0.527916	0.950662	0.812441	1.1124	33.8108	0.00072246	0.0765698	0.30809
Naive CD4-CD8- T cell %CD4-CD8- T cell || id:ebi-a-GCST90001567	Inflammatory bowel disease	MR Egger	13	-0.669928	0.584964	0.276413	0.511746	0.162601	1.61059	30.6304	0.00126059	NA	NA
Naive CD4-CD8- T cell %CD4-CD8- T cell || id:ebi-a-GCST90001567	Inflammatory bowel disease	Weighted median	13	0.0380215	0.0743572	0.609116	1.03875	0.89788	1.20173	NA	NA	NA	NA
Naive CD4-CD8- T cell %T cell || id:ebi-a-GCST90001568	Inflammatory bowel disease	Inverse variance weighted	17	0.00215218	0.0619603	0.972291	1.00215	0.88755	1.13156	32.2467	0.00928566	-0.00748671	0.814703
Naive CD4-CD8- T cell %T cell || id:ebi-a-GCST90001568	Inflammatory bowel disease	MR Egger	17	0.0524443	0.22031	0.815065	1.05384	0.684297	1.62296	32.1248	0.00619088	NA	NA
Naive CD4-CD8- T cell %T cell || id:ebi-a-GCST90001568	Inflammatory bowel disease	Weighted median	17	-0.00123248	0.0660335	0.985109	0.998768	0.877518	1.13677	NA	NA	NA	NA
Effector Memory CD4-CD8- T cell Absolute Count || id:ebi-a-GCST90001569	Inflammatory bowel disease	Inverse variance weighted	15	0.00268644	0.0407641	0.947456	1.00269	0.925694	1.08609	11.0477	0.682286	0.0182601	0.441795
Effector Memory CD4-CD8- T cell Absolute Count || id:ebi-a-GCST90001569	Inflammatory bowel disease	MR Egger	15	-0.111816	0.149969	0.469178	0.894208	0.666474	1.19976	10.4182	0.659429	NA	NA
Effector Memory CD4-CD8- T cell Absolute Count || id:ebi-a-GCST90001569	Inflammatory bowel disease	Weighted median	15	-0.00975263	0.0560408	0.861844	0.990295	0.887282	1.10527	NA	NA	NA	NA
Effector Memory CD4-CD8- T cell %CD4-CD8- T cell || id:ebi-a-GCST90001570	Inflammatory bowel disease	Inverse variance weighted	16	0.0458274	0.0460381	0.31953	1.04689	0.956564	1.14575	25.7064	0.0412238	0.00920415	0.795681
Effector Memory CD4-CD8- T cell %CD4-CD8- T cell || id:ebi-a-GCST90001570	Inflammatory bowel disease	MR Egger	16	-0.0136911	0.230466	0.953468	0.986402	0.627881	1.54964	25.5792	0.029262	NA	NA
Effector Memory CD4-CD8- T cell %CD4-CD8- T cell || id:ebi-a-GCST90001570	Inflammatory bowel disease	Weighted median	16	0.0179907	0.0535675	0.736983	1.01815	0.916676	1.13087	NA	NA	NA	NA
Effector Memory CD4-CD8- T cell %T cell || id:ebi-a-GCST90001571	Inflammatory bowel disease	Inverse variance weighted	20	0.0457086	0.0410829	0.265883	1.04677	0.965785	1.13454	25.9777	0.130812	0.00917618	0.686195
Effector Memory CD4-CD8- T cell %T cell || id:ebi-a-GCST90001571	Inflammatory bowel disease	MR Egger	20	-0.00478877	0.129955	0.971011	0.995223	0.771437	1.28393	25.7366	0.105935	NA	NA
Effector Memory CD4-CD8- T cell %T cell || id:ebi-a-GCST90001571	Inflammatory bowel disease	Weighted median	20	0.0522748	0.0546713	0.338989	1.05367	0.946598	1.17284	NA	NA	NA	NA
Terminally Differentiated CD4-CD8- T cell Absolute Count || id:ebi-a-GCST90001572	Inflammatory bowel disease	Inverse variance weighted	14	-0.0198535	0.0371783	0.593336	0.980342	0.911446	1.05445	8.30127	0.823434	-0.00307507	0.870637
Terminally Differentiated CD4-CD8- T cell Absolute Count || id:ebi-a-GCST90001572	Inflammatory bowel disease	MR Egger	14	-0.00162953	0.115677	0.988992	0.998372	0.79584	1.25244	8.2736	0.763401	NA	NA
Terminally Differentiated CD4-CD8- T cell Absolute Count || id:ebi-a-GCST90001572	Inflammatory bowel disease	Weighted median	14	-0.0252594	0.0501531	0.614511	0.975057	0.883769	1.07577	NA	NA	NA	NA
Terminally Differentiated CD4-CD8- T cell %CD4-CD8- T cell || id:ebi-a-GCST90001573	Inflammatory bowel disease	Inverse variance weighted	18	0.0169881	0.0396864	0.668609	1.01713	0.941014	1.09941	22.6548	0.160829	-0.0203134	0.410839
Terminally Differentiated CD4-CD8- T cell %CD4-CD8- T cell || id:ebi-a-GCST90001573	Inflammatory bowel disease	MR Egger	18	0.144672	0.156403	0.368709	1.15566	0.850546	1.57023	21.6881	0.153551	NA	NA
Terminally Differentiated CD4-CD8- T cell %CD4-CD8- T cell || id:ebi-a-GCST90001573	Inflammatory bowel disease	Weighted median	18	0.0368788	0.0500267	0.461012	1.03757	0.94066	1.14446	NA	NA	NA	NA
Terminally Differentiated CD4-CD8- T cell %T cell || id:ebi-a-GCST90001574	Inflammatory bowel disease	Inverse variance weighted	12	-0.0665939	0.0502967	0.185496	0.935575	0.847745	1.0325	17.4265	0.0958766	0.0523777	0.0751482
Terminally Differentiated CD4-CD8- T cell %T cell || id:ebi-a-GCST90001574	Inflammatory bowel disease	MR Egger	12	-0.37522	0.161712	0.0427513	0.687138	0.500486	0.943401	12.4982	0.253098	NA	NA
Terminally Differentiated CD4-CD8- T cell %T cell || id:ebi-a-GCST90001574	Inflammatory bowel disease	Weighted median	12	-0.0671999	0.0571877	0.239964	0.935008	0.835865	1.04591	NA	NA	NA	NA
Naive CD4+ T cell %T cell || id:ebi-a-GCST90001575	Inflammatory bowel disease	Inverse variance weighted	25	0.018319	0.0306017	0.549421	1.01849	0.959196	1.08145	21.2477	0.624075	-0.00697391	0.655164
Naive CD4+ T cell %T cell || id:ebi-a-GCST90001575	Inflammatory bowel disease	MR Egger	25	0.0622678	0.101836	0.546897	1.06425	0.871682	1.29935	21.0429	0.578466	NA	NA
Naive CD4+ T cell %T cell || id:ebi-a-GCST90001575	Inflammatory bowel disease	Weighted median	25	0.0379137	0.0411435	0.35679	1.03864	0.958172	1.12587	NA	NA	NA	NA
Transitional B cell %B cell || id:ebi-a-GCST90001576	Inflammatory bowel disease	Inverse variance weighted	12	-0.0879878	0.0611634	0.150272	0.915772	0.812314	1.03241	18.2389	0.0762008	-0.0366868	0.282112
Transitional B cell %B cell || id:ebi-a-GCST90001576	Inflammatory bowel disease	MR Egger	12	0.145969	0.214466	0.511565	1.15716	0.760039	1.76178	16.1514	0.0953784	NA	NA
Transitional B cell %B cell || id:ebi-a-GCST90001576	Inflammatory bowel disease	Weighted median	12	0.0091489	0.0691295	0.894712	1.00919	0.881311	1.15563	NA	NA	NA	NA
Transitional B cell Absolute Count || id:ebi-a-GCST90001577	Inflammatory bowel disease	Inverse variance weighted	24	-0.029855	0.0468266	0.523756	0.970586	0.885471	1.06388	45.5429	0.00340803	-0.00894264	0.692088
Transitional B cell Absolute Count || id:ebi-a-GCST90001577	Inflammatory bowel disease	MR Egger	24	0.0290993	0.154468	0.852302	1.02953	0.760592	1.39355	45.212	0.00249427	NA	NA
Transitional B cell Absolute Count || id:ebi-a-GCST90001577	Inflammatory bowel disease	Weighted median	24	-0.0164056	0.0528881	0.756413	0.983728	0.886862	1.09117	NA	NA	NA	NA
Transitional B cell %lymphocyte || id:ebi-a-GCST90001578	Inflammatory bowel disease	Inverse variance weighted	21	-0.0686167	0.0488102	0.159788	0.933685	0.8485	1.02742	35.041	0.019887	-0.00885607	0.733798
Transitional B cell %lymphocyte || id:ebi-a-GCST90001578	Inflammatory bowel disease	MR Egger	21	-0.00759215	0.183735	0.967471	0.992437	0.692316	1.42266	34.8227	0.0146693	NA	NA
Transitional B cell %lymphocyte || id:ebi-a-GCST90001578	Inflammatory bowel disease	Weighted median	21	0.0121002	0.0562824	0.829774	1.01217	0.906456	1.13022	NA	NA	NA	NA
CD14- CD16+ monocyte Absolute Count || id:ebi-a-GCST90001579	Inflammatory bowel disease	Inverse variance weighted	14	0.0238665	0.0390183	0.540754	1.02415	0.94875	1.10555	10.797	0.627819	0.00122711	0.949683
CD14- CD16+ monocyte Absolute Count || id:ebi-a-GCST90001579	Inflammatory bowel disease	MR Egger	14	0.0183343	0.094304	0.849102	1.0185	0.846622	1.22528	10.7928	0.546751	NA	NA
CD14- CD16+ monocyte Absolute Count || id:ebi-a-GCST90001579	Inflammatory bowel disease	Weighted median	14	0.0144784	0.0564312	0.797513	1.01458	0.908349	1.13324	NA	NA	NA	NA
CD14+ CD16+ monocyte Absolute Count || id:ebi-a-GCST90001580	Inflammatory bowel disease	Inverse variance weighted	14	0.0898029	0.0588726	0.127165	1.09396	0.974737	1.22776	42.822	4.8e-05	0.0304899	0.182279
CD14+ CD16+ monocyte Absolute Count || id:ebi-a-GCST90001580	Inflammatory bowel disease	MR Egger	14	-0.0244708	0.0986538	0.808292	0.975826	0.80426	1.18399	36.6932	0.000250478	NA	NA
CD14+ CD16+ monocyte Absolute Count || id:ebi-a-GCST90001580	Inflammatory bowel disease	Weighted median	14	0.0407937	0.0420723	0.332241	1.04164	0.959188	1.13117	NA	NA	NA	NA
CD14- CD16- Absolute Count || id:ebi-a-GCST90001581	Inflammatory bowel disease	Inverse variance weighted	17	0.108973	0.0401207	0.00660496	1.11513	1.0308	1.20636	21.5657	0.157777	-0.00435402	0.849811
CD14- CD16- Absolute Count || id:ebi-a-GCST90001581	Inflammatory bowel disease	MR Egger	17	0.13212	0.127072	0.314937	1.14124	0.889638	1.46401	21.5124	0.12124	NA	NA
CD14- CD16- Absolute Count || id:ebi-a-GCST90001581	Inflammatory bowel disease	Weighted median	17	0.125037	0.0499733	0.0123467	1.13319	1.02746	1.2498	NA	NA	NA	NA
CD14+ CD16- monocyte Absolute Count || id:ebi-a-GCST90001582	Inflammatory bowel disease	Inverse variance weighted	20	0.0167255	0.0641271	0.794232	1.01687	0.896763	1.15305	61.2777	2.43e-06	0.0182234	0.625989
CD14+ CD16- monocyte Absolute Count || id:ebi-a-GCST90001582	Inflammatory bowel disease	MR Egger	20	-0.100044	0.244409	0.687127	0.904798	0.560411	1.46082	60.4519	1.73e-06	NA	NA
CD14+ CD16- monocyte Absolute Count || id:ebi-a-GCST90001582	Inflammatory bowel disease	Weighted median	20	0.00628391	0.0592472	0.915533	1.0063	0.895977	1.13022	NA	NA	NA	NA
Monocyte Absolute Count || id:ebi-a-GCST90001583	Inflammatory bowel disease	Inverse variance weighted	18	-0.0359282	0.0620151	0.562356	0.96471	0.854296	1.08939	44.8863	0.000253181	-0.0159227	0.726978
Monocyte Absolute Count || id:ebi-a-GCST90001583	Inflammatory bowel disease	MR Egger	18	0.0724594	0.311602	0.819068	1.07515	0.583751	1.9802	44.5348	0.000163509	NA	NA
Monocyte Absolute Count || id:ebi-a-GCST90001583	Inflammatory bowel disease	Weighted median	18	-0.0614341	0.0621053	0.322569	0.940415	0.832635	1.06215	NA	NA	NA	NA
CD14- CD16+ monocyte %monocyte || id:ebi-a-GCST90001584	Inflammatory bowel disease	Inverse variance weighted	14	0.055213	0.0414317	0.182654	1.05677	0.974342	1.14616	14.5618	0.335502	0.0233333	0.166946
CD14- CD16+ monocyte %monocyte || id:ebi-a-GCST90001584	Inflammatory bowel disease	MR Egger	14	-0.0854226	0.1035	0.425284	0.918124	0.74955	1.12461	12.3364	0.419054	NA	NA
CD14- CD16+ monocyte %monocyte || id:ebi-a-GCST90001584	Inflammatory bowel disease	Weighted median	14	0.0376932	0.0557923	0.499295	1.03841	0.930848	1.15841	NA	NA	NA	NA
CD14+ CD16+ monocyte %monocyte || id:ebi-a-GCST90001585	Inflammatory bowel disease	Inverse variance weighted	18	0.0323655	0.0413895	0.43423	1.03289	0.952412	1.12018	36.0982	0.00445006	-5.1e-05	0.99781
CD14+ CD16+ monocyte %monocyte || id:ebi-a-GCST90001585	Inflammatory bowel disease	MR Egger	18	0.0325424	0.0764545	0.676038	1.03308	0.889311	1.20009	36.0982	0.00280399	NA	NA
CD14+ CD16+ monocyte %monocyte || id:ebi-a-GCST90001585	Inflammatory bowel disease	Weighted median	18	0.0150783	0.038715	0.69693	1.01519	0.941008	1.09522	NA	NA	NA	NA
CD14+ CD16- monocyte %monocyte || id:ebi-a-GCST90001586	Inflammatory bowel disease	Inverse variance weighted	17	-0.0301105	0.036388	0.407963	0.970338	0.903544	1.04207	13.5179	0.634583	-0.00810545	0.585881
CD14+ CD16- monocyte %monocyte || id:ebi-a-GCST90001586	Inflammatory bowel disease	MR Egger	17	0.0120261	0.0839711	0.888025	1.0121	0.85851	1.19317	13.2078	0.586248	NA	NA
CD14+ CD16- monocyte %monocyte || id:ebi-a-GCST90001586	Inflammatory bowel disease	Weighted median	17	-0.0296972	0.0537524	0.580618	0.970739	0.873671	1.07859	NA	NA	NA	NA
CD16+ monocyte %monocyte || id:ebi-a-GCST90001587	Inflammatory bowel disease	Inverse variance weighted	17	0.0236409	0.0400879	0.555374	1.02392	0.94655	1.10762	21.5553	0.158139	0.00969473	0.560307
CD16+ monocyte %monocyte || id:ebi-a-GCST90001587	Inflammatory bowel disease	MR Egger	17	-0.0302015	0.0992278	0.765031	0.97025	0.798765	1.17855	21.0573	0.135009	NA	NA
CD16+ monocyte %monocyte || id:ebi-a-GCST90001587	Inflammatory bowel disease	Weighted median	17	0.011574	0.0509443	0.820277	1.01164	0.915507	1.11787	NA	NA	NA	NA
T/B cell || id:ebi-a-GCST90001588	Inflammatory bowel disease	Inverse variance weighted	22	0.0329378	0.0355125	0.353667	1.03349	0.963997	1.10798	28.4997	0.126539	0.0112086	0.615554
T/B cell || id:ebi-a-GCST90001588	Inflammatory bowel disease	MR Egger	22	-0.0417804	0.150869	0.784675	0.95908	0.713563	1.28907	28.1337	0.106272	NA	NA
T/B cell || id:ebi-a-GCST90001588	Inflammatory bowel disease	Weighted median	22	0.0488909	0.0455331	0.282938	1.05011	0.960449	1.14813	NA	NA	NA	NA
CD4+/CD8+ T cell || id:ebi-a-GCST90001589	Inflammatory bowel disease	Inverse variance weighted	10	0.0771792	0.0462026	0.09483	1.08024	0.986711	1.18262	8.01418	0.532718	0.0377208	0.155742
CD4+/CD8+ T cell || id:ebi-a-GCST90001589	Inflammatory bowel disease	MR Egger	10	-0.148526	0.151262	0.354903	0.861978	0.640824	1.15945	5.55859	0.696541	NA	NA
CD4+/CD8+ T cell || id:ebi-a-GCST90001589	Inflammatory bowel disease	Weighted median	10	0.11477	0.0624362	0.0660328	1.12162	0.992424	1.26763	NA	NA	NA	NA
CD4+ T cell Absolute Count || id:ebi-a-GCST90001590	Inflammatory bowel disease	Inverse variance weighted	18	0.00957034	0.0739076	0.896969	1.00962	0.873464	1.16699	74.9728	2.95e-09	0.000302026	0.994581
CD4+ T cell Absolute Count || id:ebi-a-GCST90001590	Inflammatory bowel disease	MR Egger	18	0.00766687	0.286254	0.978964	1.0077	0.574997	1.76601	74.9726	1.32e-09	NA	NA
CD4+ T cell Absolute Count || id:ebi-a-GCST90001590	Inflammatory bowel disease	Weighted median	18	-0.0435122	0.0611336	0.476615	0.957421	0.849307	1.0793	NA	NA	NA	NA
CD4+ T cell %T cell || id:ebi-a-GCST90001591	Inflammatory bowel disease	Inverse variance weighted	14	0.0159141	0.0476181	0.738227	1.01604	0.925503	1.11544	15.4816	0.278259	-0.00605762	0.82277
CD4+ T cell %T cell || id:ebi-a-GCST90001591	Inflammatory bowel disease	MR Egger	14	0.0527144	0.168177	0.759324	1.05413	0.75812	1.46571	15.4143	0.219559	NA	NA
CD4+ T cell %T cell || id:ebi-a-GCST90001591	Inflammatory bowel disease	Weighted median	14	0.00597941	0.0617595	0.922871	1.006	0.891304	1.13545	NA	NA	NA	NA
CD8+ T cell Absolute Count || id:ebi-a-GCST90001592	Inflammatory bowel disease	Inverse variance weighted	14	0.0590025	0.0426659	0.166696	1.06078	0.975678	1.1533	8.12762	0.835188	0.0316076	0.180198
CD8+ T cell Absolute Count || id:ebi-a-GCST90001592	Inflammatory bowel disease	MR Egger	14	-0.159778	0.159552	0.336391	0.852333	0.623442	1.16526	6.10256	0.910824	NA	NA
CD8+ T cell Absolute Count || id:ebi-a-GCST90001592	Inflammatory bowel disease	Weighted median	14	0.0489711	0.0576367	0.395519	1.05019	0.938008	1.17579	NA	NA	NA	NA
CD8+ T cell %T cell || id:ebi-a-GCST90001593	Inflammatory bowel disease	Inverse variance weighted	15	-0.0796408	0.036716	0.0300747	0.923448	0.859328	0.992352	14.3624	0.423075	-0.0250235	0.276834
CD8+ T cell %T cell || id:ebi-a-GCST90001593	Inflammatory bowel disease	MR Egger	15	0.0557123	0.12466	0.662292	1.05729	0.8281	1.34992	13.0673	0.442626	NA	NA
CD8+ T cell %T cell || id:ebi-a-GCST90001593	Inflammatory bowel disease	Weighted median	15	-0.0989516	0.0545475	0.0696708	0.905787	0.813943	1.00799	NA	NA	NA	NA
CD4+CD8+ T cell Absolute Count || id:ebi-a-GCST90001594	Inflammatory bowel disease	Inverse variance weighted	12	-0.0204417	0.0486227	0.674183	0.979766	0.890705	1.07773	17.8231	0.0857783	-0.0300948	0.222359
CD4+CD8+ T cell Absolute Count || id:ebi-a-GCST90001594	Inflammatory bowel disease	MR Egger	12	0.148398	0.138058	0.307672	1.15997	0.884975	1.52043	15.2422	0.123477	NA	NA
CD4+CD8+ T cell Absolute Count || id:ebi-a-GCST90001594	Inflammatory bowel disease	Weighted median	12	0.0480196	0.0558162	0.389614	1.04919	0.940466	1.17049	NA	NA	NA	NA
CD4+CD8+ T cell %T cell || id:ebi-a-GCST90001595	Inflammatory bowel disease	Inverse variance weighted	6	-0.0866757	0.0702243	0.217103	0.916974	0.799063	1.05228	2.32375	0.802772	0.0455624	0.415035
CD4+CD8+ T cell %T cell || id:ebi-a-GCST90001595	Inflammatory bowel disease	MR Egger	6	-0.382017	0.33261	0.314757	0.682483	0.355606	1.30983	1.49851	0.826906	NA	NA
CD4+CD8+ T cell %T cell || id:ebi-a-GCST90001595	Inflammatory bowel disease	Weighted median	6	-0.11013	0.0861529	0.20114	0.895718	0.756548	1.06049	NA	NA	NA	NA
CD8dim T cell Absolute Count || id:ebi-a-GCST90001596	Inflammatory bowel disease	Inverse variance weighted	18	0.00891259	0.0439808	0.839411	1.00895	0.925622	1.09979	20.3441	0.257009	-0.0114193	0.599291
CD8dim T cell Absolute Count || id:ebi-a-GCST90001596	Inflammatory bowel disease	MR Egger	18	0.0662156	0.115956	0.575906	1.06846	0.851242	1.3411	19.9852	0.22089	NA	NA
CD8dim T cell Absolute Count || id:ebi-a-GCST90001596	Inflammatory bowel disease	Weighted median	18	0.0540395	0.0598382	0.366476	1.05553	0.938715	1.18687	NA	NA	NA	NA
CD8dim T cell %T cell || id:ebi-a-GCST90001597	Inflammatory bowel disease	Inverse variance weighted	14	-0.0204139	0.049013	0.677045	0.979793	0.890048	1.07859	16.0169	0.24822	-0.0333237	0.107839
CD8dim T cell %T cell || id:ebi-a-GCST90001597	Inflammatory bowel disease	MR Egger	14	0.119244	0.0924053	0.221206	1.12664	0.940005	1.35034	12.7969	0.383977	NA	NA
CD8dim T cell %T cell || id:ebi-a-GCST90001597	Inflammatory bowel disease	Weighted median	14	0.00177296	0.066169	0.978624	1.00177	0.879925	1.1405	NA	NA	NA	NA
CD4-CD8- T cell Absolute Count || id:ebi-a-GCST90001598	Inflammatory bowel disease	Inverse variance weighted	18	-0.0714646	0.0531776	0.178985	0.931029	0.838876	1.03331	36.2577	0.00423666	-0.0221462	0.411788
CD4-CD8- T cell Absolute Count || id:ebi-a-GCST90001598	Inflammatory bowel disease	MR Egger	18	0.0725703	0.179129	0.690748	1.07527	0.756901	1.52755	34.7166	0.00434459	NA	NA
CD4-CD8- T cell Absolute Count || id:ebi-a-GCST90001598	Inflammatory bowel disease	Weighted median	18	-0.0636814	0.0592586	0.282538	0.938304	0.835414	1.05387	NA	NA	NA	NA
CD4-CD8- T cell %T cell || id:ebi-a-GCST90001599	Inflammatory bowel disease	Inverse variance weighted	13	-0.0183316	0.0591823	0.756752	0.981835	0.874303	1.10259	27.2389	0.00713774	-0.0449234	0.0696593
CD4-CD8- T cell %T cell || id:ebi-a-GCST90001599	Inflammatory bowel disease	MR Egger	13	0.249638	0.143448	0.109675	1.28356	0.968971	1.70028	19.9246	0.046386	NA	NA
CD4-CD8- T cell %T cell || id:ebi-a-GCST90001599	Inflammatory bowel disease	Weighted median	13	0.0133133	0.0604957	0.825816	1.0134	0.900092	1.14098	NA	NA	NA	NA
Leukocyte Absolute Count || id:ebi-a-GCST90001600	Inflammatory bowel disease	Inverse variance weighted	4	-0.0407949	0.0781665	0.601742	0.960026	0.823657	1.11897	2.54387	0.467415	-0.0594831	0.767893
Leukocyte Absolute Count || id:ebi-a-GCST90001600	Inflammatory bowel disease	MR Egger	4	0.164481	0.614302	0.813975	1.17878	0.353613	3.9295	2.40682	0.300168	NA	NA
Leukocyte Absolute Count || id:ebi-a-GCST90001600	Inflammatory bowel disease	Weighted median	4	-0.0777501	0.095893	0.41748	0.925196	0.766669	1.1165	NA	NA	NA	NA
Lymphocyte Absolute Count || id:ebi-a-GCST90001601	Inflammatory bowel disease	Inverse variance weighted	12	-0.0652249	0.118921	0.583368	0.936857	0.742071	1.18277	78.4171	2.98e-12	0.0666531	0.441233
Lymphocyte Absolute Count || id:ebi-a-GCST90001601	Inflammatory bowel disease	MR Egger	12	-0.500338	0.555888	0.389244	0.606326	0.20395	1.80255	73.6789	8.6e-12	NA	NA
Lymphocyte Absolute Count || id:ebi-a-GCST90001601	Inflammatory bowel disease	Weighted median	12	0.0134379	0.0744072	0.856682	1.01353	0.87599	1.17266	NA	NA	NA	NA
Lymphocyte %leukocyte || id:ebi-a-GCST90001602	Inflammatory bowel disease	Inverse variance weighted	15	-0.00941365	0.0416225	0.821071	0.990631	0.913023	1.07483	10.8938	0.694356	-0.0242934	0.439598
Lymphocyte %leukocyte || id:ebi-a-GCST90001602	Inflammatory bowel disease	MR Egger	15	0.145196	0.198333	0.477111	1.15627	0.78385	1.70562	10.2581	0.672702	NA	NA
Lymphocyte %leukocyte || id:ebi-a-GCST90001602	Inflammatory bowel disease	Weighted median	15	-0.0369262	0.0583478	0.526823	0.963747	0.8596	1.08051	NA	NA	NA	NA
T cell Absolute Count || id:ebi-a-GCST90001603	Inflammatory bowel disease	Inverse variance weighted	12	0.0488015	0.0704509	0.488496	1.05001	0.914587	1.20549	25.7271	0.00712459	-0.0189593	0.708897
T cell Absolute Count || id:ebi-a-GCST90001603	Inflammatory bowel disease	MR Egger	12	0.181954	0.354277	0.618693	1.19956	0.599038	2.40209	25.3529	0.00471523	NA	NA
T cell Absolute Count || id:ebi-a-GCST90001603	Inflammatory bowel disease	Weighted median	12	0.030082	0.0687843	0.661867	1.03054	0.900563	1.17927	NA	NA	NA	NA
T cell %lymphocyte || id:ebi-a-GCST90001604	Inflammatory bowel disease	Inverse variance weighted	15	0.131613	0.0487469	0.00693571	1.14067	1.03673	1.25503	30.4182	0.00668105	-0.0296619	0.350377
T cell %lymphocyte || id:ebi-a-GCST90001604	Inflammatory bowel disease	MR Egger	15	0.277629	0.158455	0.103295	1.32	0.967594	1.80074	28.3704	0.00803189	NA	NA
T cell %lymphocyte || id:ebi-a-GCST90001604	Inflammatory bowel disease	Weighted median	15	0.0605373	0.0517951	0.24249	1.06241	0.959847	1.17593	NA	NA	NA	NA
T cell %leukocyte || id:ebi-a-GCST90001605	Inflammatory bowel disease	Inverse variance weighted	13	0.058503	0.0487973	0.230567	1.06025	0.963542	1.16666	16.2578	0.179713	0.00529354	0.849509
T cell %leukocyte || id:ebi-a-GCST90001605	Inflammatory bowel disease	MR Egger	13	0.0263962	0.172927	0.881443	1.02675	0.731586	1.44099	16.2022	0.133789	NA	NA
T cell %leukocyte || id:ebi-a-GCST90001605	Inflammatory bowel disease	Weighted median	13	0.0515683	0.0568787	0.364599	1.05292	0.941846	1.1771	NA	NA	NA	NA
CD4+ T cell %leukocyte || id:ebi-a-GCST90001606	Inflammatory bowel disease	Inverse variance weighted	9	-0.0124814	0.049652	0.801522	0.987596	0.896014	1.08854	7.68566	0.464762	-0.0254785	0.398977
CD4+ T cell %leukocyte || id:ebi-a-GCST90001606	Inflammatory bowel disease	MR Egger	9	0.150273	0.187903	0.450145	1.16215	0.804112	1.67961	6.87911	0.441575	NA	NA
CD4+ T cell %leukocyte || id:ebi-a-GCST90001606	Inflammatory bowel disease	Weighted median	9	-0.0135566	0.0675791	0.841009	0.986535	0.864148	1.12626	NA	NA	NA	NA
CD8+ T cell %leukocyte || id:ebi-a-GCST90001607	Inflammatory bowel disease	Inverse variance weighted	12	-0.0662977	0.0439226	0.131191	0.935852	0.858657	1.01999	12.4653	0.329702	0.000340583	0.989655
CD8+ T cell %leukocyte || id:ebi-a-GCST90001607	Inflammatory bowel disease	MR Egger	12	-0.068413	0.165651	0.688327	0.933875	0.674968	1.29209	12.4651	0.255134	NA	NA
CD8+ T cell %leukocyte || id:ebi-a-GCST90001607	Inflammatory bowel disease	Weighted median	12	-0.0611337	0.05607	0.275576	0.940697	0.842796	1.04997	NA	NA	NA	NA
CD4+CD8+ T cell %leukocyte || id:ebi-a-GCST90001608	Inflammatory bowel disease	Inverse variance weighted	17	0.00911309	0.0364173	0.802401	1.00915	0.939634	1.08382	15.382	0.496857	-0.0136958	0.459884
CD4+CD8+ T cell %leukocyte || id:ebi-a-GCST90001608	Inflammatory bowel disease	MR Egger	17	0.0779085	0.0977333	0.437799	1.08102	0.892571	1.30926	14.8066	0.465433	NA	NA
CD4+CD8+ T cell %leukocyte || id:ebi-a-GCST90001608	Inflammatory bowel disease	Weighted median	17	0.0691406	0.0493527	0.161229	1.07159	0.972786	1.18042	NA	NA	NA	NA
CD4+ CD8dim T cell Absolute Count || id:ebi-a-GCST90001609	Inflammatory bowel disease	Inverse variance weighted	16	-0.00498744	0.0614209	0.935282	0.995025	0.882168	1.12232	52.8441	4.09e-06	0.012439	0.652421
CD4+ CD8dim T cell Absolute Count || id:ebi-a-GCST90001609	Inflammatory bowel disease	MR Egger	16	-0.069054	0.152841	0.658331	0.933276	0.691687	1.25925	52.0565	2.75e-06	NA	NA
CD4+ CD8dim T cell Absolute Count || id:ebi-a-GCST90001609	Inflammatory bowel disease	Weighted median	16	0.0203984	0.0482634	0.672552	1.02061	0.928488	1.12187	NA	NA	NA	NA
CD4+ CD8dim T cell %lymphocyte || id:ebi-a-GCST90001610	Inflammatory bowel disease	Inverse variance weighted	18	-0.021004	0.0570605	0.712799	0.979215	0.875603	1.09509	60.8739	7.53e-07	0.0049326	0.836352
CD4+ CD8dim T cell %lymphocyte || id:ebi-a-GCST90001610	Inflammatory bowel disease	MR Egger	18	-0.0468138	0.136241	0.735613	0.954265	0.730632	1.24635	60.7066	3.98e-07	NA	NA
CD4+ CD8dim T cell %lymphocyte || id:ebi-a-GCST90001610	Inflammatory bowel disease	Weighted median	18	0.000905331	0.0459849	0.984293	1.00091	0.91464	1.09531	NA	NA	NA	NA
CD4+ CD8dim T cell %leukocyte || id:ebi-a-GCST90001611	Inflammatory bowel disease	Inverse variance weighted	16	-0.0153158	0.0619196	0.804637	0.984801	0.872251	1.11187	58.4674	4.62e-07	0.0151646	0.577447
CD4+ CD8dim T cell %leukocyte || id:ebi-a-GCST90001611	Inflammatory bowel disease	MR Egger	16	-0.0913108	0.14753	0.545902	0.912734	0.683541	1.21878	57.1395	3.7e-07	NA	NA
CD4+ CD8dim T cell %leukocyte || id:ebi-a-GCST90001611	Inflammatory bowel disease	Weighted median	16	0.00604711	0.0468153	0.897223	1.00607	0.91786	1.10275	NA	NA	NA	NA
CD8dim T cell %leukocyte || id:ebi-a-GCST90001612	Inflammatory bowel disease	Inverse variance weighted	14	-0.00421556	0.0540685	0.937854	0.995793	0.895664	1.10712	21.2905	0.0673776	-0.0254875	0.310451
CD8dim T cell %leukocyte || id:ebi-a-GCST90001612	Inflammatory bowel disease	MR Egger	14	0.112585	0.122723	0.377006	1.11917	0.879896	1.42351	19.4708	0.0777818	NA	NA
CD8dim T cell %leukocyte || id:ebi-a-GCST90001612	Inflammatory bowel disease	Weighted median	14	0.0485502	0.0671697	0.469803	1.04975	0.920257	1.19746	NA	NA	NA	NA
CD4-CD8- T cell %leukocyte || id:ebi-a-GCST90001613	Inflammatory bowel disease	Inverse variance weighted	17	-0.0201293	0.0571119	0.724498	0.980072	0.876281	1.09616	38.6981	0.00120219	-0.0297542	0.312476
CD4-CD8- T cell %leukocyte || id:ebi-a-GCST90001613	Inflammatory bowel disease	MR Egger	17	0.146825	0.16958	0.400229	1.15815	0.830646	1.61479	36.071	0.00172659	NA	NA
CD4-CD8- T cell %leukocyte || id:ebi-a-GCST90001613	Inflammatory bowel disease	Weighted median	17	0.0133159	0.0593781	0.822558	1.0134	0.902068	1.13848	NA	NA	NA	NA
CD8+ and CD8dim T cell %leukocyte || id:ebi-a-GCST90001614	Inflammatory bowel disease	Inverse variance weighted	10	-0.0123525	0.0515503	0.810625	0.987723	0.892801	1.09274	12.7357	0.174934	0.0570926	0.0521999
CD8+ and CD8dim T cell %leukocyte || id:ebi-a-GCST90001614	Inflammatory bowel disease	MR Egger	10	-0.364771	0.160633	0.0528211	0.694356	0.506814	0.951295	7.54452	0.479176	NA	NA
CD8+ and CD8dim T cell %leukocyte || id:ebi-a-GCST90001614	Inflammatory bowel disease	Weighted median	10	-0.017427	0.0637618	0.784612	0.982724	0.867274	1.11354	NA	NA	NA	NA
TCRgd T cell Absolute Count || id:ebi-a-GCST90001615	Inflammatory bowel disease	Inverse variance weighted	15	-0.034401	0.0541217	0.525022	0.966184	0.868941	1.07431	26.4454	0.0227077	0.062087	0.00638286
TCRgd T cell Absolute Count || id:ebi-a-GCST90001615	Inflammatory bowel disease	MR Egger	15	-0.36656	0.110529	0.00556914	0.693115	0.558111	0.860775	14.6086	0.332423	NA	NA
TCRgd T cell Absolute Count || id:ebi-a-GCST90001615	Inflammatory bowel disease	Weighted median	15	-0.0309969	0.0673228	0.645213	0.969479	0.849634	1.10623	NA	NA	NA	NA
TCRgd T cell %T cell || id:ebi-a-GCST90001616	Inflammatory bowel disease	Inverse variance weighted	13	0.112803	0.053671	0.0355756	1.11941	1.00764	1.24358	22.7529	0.0298984	-0.0472374	0.0340051
TCRgd T cell %T cell || id:ebi-a-GCST90001616	Inflammatory bowel disease	MR Egger	13	0.373947	0.117026	0.00852399	1.45346	1.15555	1.82818	14.8478	0.189573	NA	NA
TCRgd T cell %T cell || id:ebi-a-GCST90001616	Inflammatory bowel disease	Weighted median	13	-0.00912377	0.0621396	0.883269	0.990918	0.87729	1.11926	NA	NA	NA	NA
TCRgd T cell %lymphocyte || id:ebi-a-GCST90001617	Inflammatory bowel disease	Inverse variance weighted	12	0.12098	0.0564468	0.0320931	1.1286	1.0104	1.26063	22.2784	0.0223031	-0.0393705	0.0589316
TCRgd T cell %lymphocyte || id:ebi-a-GCST90001617	Inflammatory bowel disease	MR Egger	12	0.349253	0.11784	0.0141956	1.41801	1.12557	1.78643	15.3214	0.120778	NA	NA
TCRgd T cell %lymphocyte || id:ebi-a-GCST90001617	Inflammatory bowel disease	Weighted median	12	-0.00908596	0.0683826	0.894297	0.990955	0.866654	1.13308	NA	NA	NA	NA
HLA DR+ T cell Absolute Count || id:ebi-a-GCST90001618	Inflammatory bowel disease	Inverse variance weighted	18	0.0380175	0.0375199	0.310935	1.03875	0.965102	1.11802	31.2859	0.018431	-0.0373357	0.0170655
HLA DR+ T cell Absolute Count || id:ebi-a-GCST90001618	Inflammatory bowel disease	MR Egger	18	0.210394	0.07233	0.0102517	1.23416	1.07104	1.42214	21.6855	0.15364	NA	NA
HLA DR+ T cell Absolute Count || id:ebi-a-GCST90001618	Inflammatory bowel disease	Weighted median	18	0.0894517	0.0419496	0.0329771	1.09357	1.00726	1.18729	NA	NA	NA	NA
HLA DR+ T cell%T cell || id:ebi-a-GCST90001619	Inflammatory bowel disease	Inverse variance weighted	19	0.0925861	0.0402012	0.021275	1.09701	1.01389	1.18694	35.7335	0.00763167	-0.014431	0.341513
HLA DR+ T cell%T cell || id:ebi-a-GCST90001619	Inflammatory bowel disease	MR Egger	19	0.156953	0.0771138	0.0577127	1.16994	1.00583	1.36083	33.828	0.00883585	NA	NA
HLA DR+ T cell%T cell || id:ebi-a-GCST90001619	Inflammatory bowel disease	Weighted median	19	0.0952065	0.0388261	0.0142014	1.09989	1.01929	1.18685	NA	NA	NA	NA
HLA DR+ T cell%lymphocyte || id:ebi-a-GCST90001620	Inflammatory bowel disease	Inverse variance weighted	15	0.0576293	0.034417	0.0940431	1.05932	0.99022	1.13325	20.5936	0.112508	-0.0355105	0.0127462
HLA DR+ T cell%lymphocyte || id:ebi-a-GCST90001620	Inflammatory bowel disease	MR Egger	15	0.198519	0.056467	0.00379826	1.2196	1.09182	1.36233	12.2647	0.506063	NA	NA
HLA DR+ T cell%lymphocyte || id:ebi-a-GCST90001620	Inflammatory bowel disease	Weighted median	15	0.0608434	0.0402361	0.130493	1.06273	0.982142	1.14994	NA	NA	NA	NA
Natural Killer T Absolute Count || id:ebi-a-GCST90001621	Inflammatory bowel disease	Inverse variance weighted	25	0.0577027	0.0291939	0.0480943	1.0594	1.00048	1.12179	14.8583	0.924836	-0.00148591	0.913726
Natural Killer T Absolute Count || id:ebi-a-GCST90001621	Inflammatory bowel disease	MR Egger	25	0.0665264	0.0856807	0.445398	1.06879	0.903565	1.26423	14.8463	0.900057	NA	NA
Natural Killer T Absolute Count || id:ebi-a-GCST90001621	Inflammatory bowel disease	Weighted median	25	0.0521915	0.0379264	0.168782	1.05358	0.978099	1.13488	NA	NA	NA	NA
Natural Killer T %T cell || id:ebi-a-GCST90001622	Inflammatory bowel disease	Inverse variance weighted	23	0.0757942	0.0301153	0.0118426	1.07874	1.01691	1.14433	23.1022	0.395975	-0.00152914	0.921232
Natural Killer T %T cell || id:ebi-a-GCST90001622	Inflammatory bowel disease	MR Egger	23	0.0845517	0.092774	0.372443	1.08823	0.907297	1.30524	23.0912	0.339133	NA	NA
Natural Killer T %T cell || id:ebi-a-GCST90001622	Inflammatory bowel disease	Weighted median	23	0.0545646	0.0430872	0.205378	1.05608	0.970556	1.14914	NA	NA	NA	NA
Natural Killer T %lymphocyte || id:ebi-a-GCST90001623	Inflammatory bowel disease	Inverse variance weighted	26	0.0815783	0.0279821	0.00355263	1.085	1.02709	1.14617	23.5573	0.545056	-0.00340173	0.820184
Natural Killer T %lymphocyte || id:ebi-a-GCST90001623	Inflammatory bowel disease	MR Egger	26	0.101889	0.0927016	0.282627	1.10726	0.923295	1.32788	23.5045	0.490205	NA	NA
Natural Killer T %lymphocyte || id:ebi-a-GCST90001623	Inflammatory bowel disease	Weighted median	26	0.0549707	0.0424412	0.195245	1.05651	0.97218	1.14815	NA	NA	NA	NA
HLA DR+ CD4+ T cell Absolute Count || id:ebi-a-GCST90001624	Inflammatory bowel disease	Inverse variance weighted	15	0.0645159	0.0498155	0.195287	1.06664	0.96742	1.17604	26.8065	0.020399	-0.0536835	0.0412241
HLA DR+ CD4+ T cell Absolute Count || id:ebi-a-GCST90001624	Inflammatory bowel disease	MR Egger	15	0.374506	0.143672	0.0217294	1.45427	1.09736	1.92727	19.2197	0.116448	NA	NA
HLA DR+ CD4+ T cell Absolute Count || id:ebi-a-GCST90001624	Inflammatory bowel disease	Weighted median	15	0.0087492	0.0575895	0.879247	1.00879	0.901112	1.12933	NA	NA	NA	NA
HLA DR+ CD4+ T cell %T cell || id:ebi-a-GCST90001625	Inflammatory bowel disease	Inverse variance weighted	18	0.0618826	0.0420262	0.140892	1.06384	0.97972	1.15518	23.5464	0.132293	-0.0323522	0.0450733
HLA DR+ CD4+ T cell %T cell || id:ebi-a-GCST90001625	Inflammatory bowel disease	MR Egger	18	0.280306	0.107446	0.0189981	1.32353	1.0722	1.63379	18.1777	0.313593	NA	NA
HLA DR+ CD4+ T cell %T cell || id:ebi-a-GCST90001625	Inflammatory bowel disease	Weighted median	18	0.0415312	0.0606225	0.493294	1.04241	0.925622	1.17392	NA	NA	NA	NA
HLA DR+ CD4+ T cell %lymphocyte || id:ebi-a-GCST90001626	Inflammatory bowel disease	Inverse variance weighted	17	0.0647869	0.0484555	0.18121	1.06693	0.970265	1.17323	30.3673	0.0161882	-0.0172146	0.364034
HLA DR+ CD4+ T cell %lymphocyte || id:ebi-a-GCST90001626	Inflammatory bowel disease	MR Egger	17	0.174039	0.126438	0.188874	1.1901	0.928877	1.52479	28.6911	0.0176222	NA	NA
HLA DR+ CD4+ T cell %lymphocyte || id:ebi-a-GCST90001626	Inflammatory bowel disease	Weighted median	17	0.0762197	0.0538189	0.156709	1.0792	0.971159	1.19926	NA	NA	NA	NA
HLA DR+ CD8+ T cell Absolute Count || id:ebi-a-GCST90001627	Inflammatory bowel disease	Inverse variance weighted	24	0.0272557	0.0354596	0.442107	1.02763	0.958635	1.10159	42.2308	0.0085323	-0.0420756	0.00737734
HLA DR+ CD8+ T cell Absolute Count || id:ebi-a-GCST90001627	Inflammatory bowel disease	MR Egger	24	0.219477	0.0719943	0.00589157	1.24543	1.08152	1.43417	30.252	0.112468	NA	NA
HLA DR+ CD8+ T cell Absolute Count || id:ebi-a-GCST90001627	Inflammatory bowel disease	Weighted median	24	0.126323	0.041513	0.00234255	1.13465	1.04598	1.23083	NA	NA	NA	NA
HLA DR+ CD8+ T cell %T cell || id:ebi-a-GCST90001628	Inflammatory bowel disease	Inverse variance weighted	19	0.0247464	0.0356548	0.487648	1.02506	0.955866	1.09925	28.9746	0.0486905	-0.0431511	0.00169156
HLA DR+ CD8+ T cell %T cell || id:ebi-a-GCST90001628	Inflammatory bowel disease	MR Egger	19	0.218359	0.059113	0.00180144	1.24403	1.10793	1.39685	15.1145	0.587232	NA	NA
HLA DR+ CD8+ T cell %T cell || id:ebi-a-GCST90001628	Inflammatory bowel disease	Weighted median	19	0.100082	0.0434659	0.0213045	1.10526	1.015	1.20355	NA	NA	NA	NA
HLA DR+ CD8+ T cell %lymphocyte || id:ebi-a-GCST90001629	Inflammatory bowel disease	Inverse variance weighted	23	0.041494	0.0309719	0.180333	1.04237	0.980972	1.1076	30.6239	0.104073	-0.0388423	0.00340373
HLA DR+ CD8+ T cell %lymphocyte || id:ebi-a-GCST90001629	Inflammatory bowel disease	MR Egger	23	0.210971	0.0576664	0.00146568	1.23488	1.1029	1.38264	19.7288	0.538492	NA	NA
HLA DR+ CD8+ T cell %lymphocyte || id:ebi-a-GCST90001629	Inflammatory bowel disease	Weighted median	23	0.0938203	0.0383475	0.0144218	1.09836	1.01883	1.1841	NA	NA	NA	NA
CD8+ Natural Killer T Absolute Count || id:ebi-a-GCST90001630	Inflammatory bowel disease	Inverse variance weighted	19	0.0565748	0.0352861	0.108865	1.05821	0.987493	1.13398	9.5944	0.944344	0.00741511	0.67228
CD8+ Natural Killer T Absolute Count || id:ebi-a-GCST90001630	Inflammatory bowel disease	MR Egger	19	0.00602265	0.122628	0.961402	1.00604	0.791101	1.27938	9.40912	0.926546	NA	NA
CD8+ Natural Killer T Absolute Count || id:ebi-a-GCST90001630	Inflammatory bowel disease	Weighted median	19	0.0416199	0.0464856	0.370611	1.0425	0.951713	1.14194	NA	NA	NA	NA
CD8+ Natural Killer T %T cell || id:ebi-a-GCST90001631	Inflammatory bowel disease	Inverse variance weighted	20	0.033611	0.0325557	0.301877	1.03418	0.970253	1.10232	15.4395	0.694286	0.00447118	0.780509
CD8+ Natural Killer T %T cell || id:ebi-a-GCST90001631	Inflammatory bowel disease	MR Egger	20	0.00812876	0.0957886	0.933308	1.00816	0.83559	1.21637	15.3595	0.637155	NA	NA
CD8+ Natural Killer T %T cell || id:ebi-a-GCST90001631	Inflammatory bowel disease	Weighted median	20	0.0118506	0.0459832	0.796627	1.01192	0.924709	1.10736	NA	NA	NA	NA
CD8+ Natural Killer T %lymphocyte || id:ebi-a-GCST90001632	Inflammatory bowel disease	Inverse variance weighted	20	0.0482965	0.0358813	0.1783	1.04948	0.97821	1.12595	15.6282	0.68192	0.00552113	0.755116
CD8+ Natural Killer T %lymphocyte || id:ebi-a-GCST90001632	Inflammatory bowel disease	MR Egger	20	0.0137635	0.114793	0.905891	1.01386	0.809588	1.26967	15.5279	0.625456	NA	NA
CD8+ Natural Killer T %lymphocyte || id:ebi-a-GCST90001632	Inflammatory bowel disease	Weighted median	20	0.00217349	0.0522876	0.966843	1.00218	0.904557	1.11033	NA	NA	NA	NA
CD8dim Natural Killer T Absolute Count || id:ebi-a-GCST90001633	Inflammatory bowel disease	Inverse variance weighted	22	0.0870695	0.0331306	0.00858713	1.09097	1.02238	1.16417	14.6197	0.841538	-0.0287973	0.0620176
CD8dim Natural Killer T Absolute Count || id:ebi-a-GCST90001633	Inflammatory bowel disease	MR Egger	22	0.238295	0.0833668	0.00971397	1.26908	1.07777	1.49435	10.712	0.953351	NA	NA
CD8dim Natural Killer T Absolute Count || id:ebi-a-GCST90001633	Inflammatory bowel disease	Weighted median	22	0.135019	0.0458942	0.00326143	1.14456	1.0461	1.25229	NA	NA	NA	NA
CD8dim Natural Killer T %T cell || id:ebi-a-GCST90001634	Inflammatory bowel disease	Inverse variance weighted	15	0.100898	0.0389253	0.00953914	1.10616	1.02491	1.19386	11.9887	0.607213	-0.0137594	0.364952
CD8dim Natural Killer T %T cell || id:ebi-a-GCST90001634	Inflammatory bowel disease	MR Egger	15	0.166762	0.0802329	0.0580329	1.18147	1.00955	1.38267	11.1073	0.601827	NA	NA
CD8dim Natural Killer T %T cell || id:ebi-a-GCST90001634	Inflammatory bowel disease	Weighted median	15	0.160934	0.0554907	0.00372922	1.17461	1.05356	1.30957	NA	NA	NA	NA
CD8dim Natural Killer T %lymphocyte || id:ebi-a-GCST90001635	Inflammatory bowel disease	Inverse variance weighted	20	0.0781579	0.0342325	0.0224216	1.08129	1.01112	1.15633	18.9544	0.459762	-0.022354	0.137225
CD8dim Natural Killer T %lymphocyte || id:ebi-a-GCST90001635	Inflammatory bowel disease	MR Egger	20	0.190691	0.0800343	0.0284217	1.21009	1.0344	1.41561	16.5347	0.55528	NA	NA
CD8dim Natural Killer T %lymphocyte || id:ebi-a-GCST90001635	Inflammatory bowel disease	Weighted median	20	0.147913	0.0475403	0.00186255	1.15941	1.05626	1.27264	NA	NA	NA	NA
CD4-CD8- Natural Killer T Absolute Count || id:ebi-a-GCST90001636	Inflammatory bowel disease	Inverse variance weighted	10	0.0328935	0.121068	0.785857	1.03344	0.815136	1.31021	67.18	5.42e-11	0.0117091	0.89231
CD4-CD8- Natural Killer T Absolute Count || id:ebi-a-GCST90001636	Inflammatory bowel disease	MR Egger	10	-0.037588	0.520384	0.944191	0.96311	0.347309	2.67076	67.0164	1.92e-11	NA	NA
CD4-CD8- Natural Killer T Absolute Count || id:ebi-a-GCST90001636	Inflammatory bowel disease	Weighted median	10	-0.05507	0.0615702	0.371094	0.946419	0.83883	1.06781	NA	NA	NA	NA
CD4-CD8- Natural Killer T %T cell || id:ebi-a-GCST90001637	Inflammatory bowel disease	Inverse variance weighted	21	0.102488	0.0615693	0.0959934	1.10792	0.981977	1.25003	71.8185	9.17e-08	-0.0208205	0.467845
CD4-CD8- Natural Killer T %T cell || id:ebi-a-GCST90001637	Inflammatory bowel disease	MR Egger	21	0.204302	0.150881	0.191605	1.22667	0.91263	1.64877	69.8022	9.92e-08	NA	NA
CD4-CD8- Natural Killer T %T cell || id:ebi-a-GCST90001637	Inflammatory bowel disease	Weighted median	21	0.0867868	0.04746	0.067455	1.09066	0.993785	1.19699	NA	NA	NA	NA
CD4-CD8- Natural Killer T %lymphocyte || id:ebi-a-GCST90001638	Inflammatory bowel disease	Inverse variance weighted	22	0.104091	0.0607411	0.0865857	1.1097	0.98515	1.25	72.425	1.43e-07	-0.0149181	0.605762
CD4-CD8- Natural Killer T %lymphocyte || id:ebi-a-GCST90001638	Inflammatory bowel disease	MR Egger	22	0.177029	0.152205	0.258482	1.19367	0.885774	1.60858	71.4427	1.06e-07	NA	NA
CD4-CD8- Natural Killer T %lymphocyte || id:ebi-a-GCST90001638	Inflammatory bowel disease	Weighted median	22	0.0948975	0.0484621	0.0502091	1.09955	0.999912	1.20911	NA	NA	NA	NA
CD3- lymphocyte Absolute Count || id:ebi-a-GCST90001639	Inflammatory bowel disease	Inverse variance weighted	15	-0.00964799	0.0665553	0.884741	0.990398	0.869274	1.1284	40.5647	0.000208196	-0.0313141	0.434303
CD3- lymphocyte Absolute Count || id:ebi-a-GCST90001639	Inflammatory bowel disease	MR Egger	15	0.183456	0.248659	0.473755	1.20136	0.737923	1.95586	38.6304	0.000228981	NA	NA
CD3- lymphocyte Absolute Count || id:ebi-a-GCST90001639	Inflammatory bowel disease	Weighted median	15	0.00106114	0.0633248	0.98663	1.00106	0.884215	1.13335	NA	NA	NA	NA
CD3- lymphocyte %lymphocyte || id:ebi-a-GCST90001640	Inflammatory bowel disease	Inverse variance weighted	5	-0.224988	0.107766	0.0368206	0.798526	0.646482	0.986327	15.822	0.0032676	0.0673303	0.366923
CD3- lymphocyte %lymphocyte || id:ebi-a-GCST90001640	Inflammatory bowel disease	MR Egger	5	-0.543343	0.318534	0.186595	0.580803	0.311091	1.08435	11.5107	0.00926183	NA	NA
CD3- lymphocyte %lymphocyte || id:ebi-a-GCST90001640	Inflammatory bowel disease	Weighted median	5	-0.0486056	0.0843029	0.564237	0.952557	0.807478	1.1237	NA	NA	NA	NA
CD3- lymphocyte %leukocyte || id:ebi-a-GCST90001641	Inflammatory bowel disease	Inverse variance weighted	11	-0.0993108	0.0500877	0.0473969	0.905461	0.820794	0.998862	12.2633	0.267822	0.0298203	0.43262
CD3- lymphocyte %leukocyte || id:ebi-a-GCST90001641	Inflammatory bowel disease	MR Egger	11	-0.293605	0.24195	0.255826	0.745571	0.46402	1.19796	11.408	0.248776	NA	NA
CD3- lymphocyte %leukocyte || id:ebi-a-GCST90001641	Inflammatory bowel disease	Weighted median	11	-0.0935314	0.0606657	0.123134	0.910709	0.808612	1.0257	NA	NA	NA	NA
B cell Absolute Count || id:ebi-a-GCST90001642	Inflammatory bowel disease	Inverse variance weighted	27	-0.0133743	0.0393166	0.733729	0.986715	0.913534	1.06576	42.307	0.0228192	-0.0109167	0.687702
B cell Absolute Count || id:ebi-a-GCST90001642	Inflammatory bowel disease	MR Egger	27	0.0643095	0.195154	0.744499	1.06642	0.727463	1.56332	42.029	0.0178444	NA	NA
B cell Absolute Count || id:ebi-a-GCST90001642	Inflammatory bowel disease	Weighted median	27	-0.0338675	0.0470773	0.471894	0.9667	0.881492	1.06014	NA	NA	NA	NA
B cell %CD3- lymphocyte || id:ebi-a-GCST90001643	Inflammatory bowel disease	Inverse variance weighted	15	0.0190423	0.0382764	0.61884	1.01922	0.945559	1.09863	7.05703	0.932491	-0.00599294	0.798585
B cell %CD3- lymphocyte || id:ebi-a-GCST90001643	Inflammatory bowel disease	MR Egger	15	0.0536487	0.138267	0.70429	1.05511	0.804644	1.38355	6.98918	0.902708	NA	NA
B cell %CD3- lymphocyte || id:ebi-a-GCST90001643	Inflammatory bowel disease	Weighted median	15	0.011403	0.0534547	0.831076	1.01147	0.910858	1.12319	NA	NA	NA	NA
B cell %lymphocyte || id:ebi-a-GCST90001644	Inflammatory bowel disease	Inverse variance weighted	24	-0.00678681	0.0338157	0.840933	0.993236	0.92954	1.0613	31.1467	0.119232	-0.0159234	0.419214
B cell %lymphocyte || id:ebi-a-GCST90001644	Inflammatory bowel disease	MR Egger	24	0.096572	0.13009	0.465729	1.10139	0.853505	1.42127	30.2159	0.11331	NA	NA
B cell %lymphocyte || id:ebi-a-GCST90001644	Inflammatory bowel disease	Weighted median	24	0.0051254	0.0438265	0.906902	1.00514	0.922402	1.0953	NA	NA	NA	NA
Natural Killer Absolute Count || id:ebi-a-GCST90001645	Inflammatory bowel disease	Inverse variance weighted	17	0.0116671	0.0563	0.83583	1.01174	0.906032	1.12977	41.1226	0.000532613	-0.00511234	0.891988
Natural Killer Absolute Count || id:ebi-a-GCST90001645	Inflammatory bowel disease	MR Egger	17	0.0442953	0.243286	0.857964	1.04529	0.648856	1.68394	41.0703	0.000311992	NA	NA
Natural Killer Absolute Count || id:ebi-a-GCST90001645	Inflammatory bowel disease	Weighted median	17	-0.0467774	0.0529614	0.377109	0.9543	0.860207	1.05868	NA	NA	NA	NA
Natural Killer %CD3- lymphocyte || id:ebi-a-GCST90001646	Inflammatory bowel disease	Inverse variance weighted	11	-0.0316444	0.0447135	0.479123	0.968851	0.887557	1.05759	5.42281	0.861206	0.0135376	0.71093
Natural Killer %CD3- lymphocyte || id:ebi-a-GCST90001646	Inflammatory bowel disease	MR Egger	11	-0.110211	0.210186	0.612703	0.895645	0.593228	1.35223	5.27646	0.809573	NA	NA
Natural Killer %CD3- lymphocyte || id:ebi-a-GCST90001646	Inflammatory bowel disease	Weighted median	11	-0.036398	0.0626102	0.561009	0.964256	0.852899	1.09015	NA	NA	NA	NA
Natural Killer %lymphocyte || id:ebi-a-GCST90001647	Inflammatory bowel disease	Inverse variance weighted	16	-0.0598634	0.0494297	0.225863	0.941893	0.854922	1.03771	29.4804	0.0139393	-0.00814332	0.748418
Natural Killer %lymphocyte || id:ebi-a-GCST90001647	Inflammatory bowel disease	MR Egger	16	-0.0150103	0.146283	0.919726	0.985102	0.739541	1.3122	29.2568	0.00964516	NA	NA
Natural Killer %lymphocyte || id:ebi-a-GCST90001647	Inflammatory bowel disease	Weighted median	16	-0.0535931	0.0524275	0.306671	0.947818	0.855259	1.05039	NA	NA	NA	NA
HLA DR+ Natural Killer Absolute Count || id:ebi-a-GCST90001648	Inflammatory bowel disease	Inverse variance weighted	18	0.0148539	0.0280517	0.596445	1.01496	0.960667	1.07233	12.3481	0.778614	-0.00111667	0.922356
HLA DR+ Natural Killer Absolute Count || id:ebi-a-GCST90001648	Inflammatory bowel disease	MR Egger	18	0.0189504	0.0499855	0.709584	1.01913	0.92402	1.12403	12.3383	0.72038	NA	NA
HLA DR+ Natural Killer Absolute Count || id:ebi-a-GCST90001648	Inflammatory bowel disease	Weighted median	18	0.0121125	0.0369057	0.74276	1.01219	0.941555	1.08812	NA	NA	NA	NA
HLA DR+ Natural Killer %Natural Killer || id:ebi-a-GCST90001649	Inflammatory bowel disease	Inverse variance weighted	16	-0.0295733	0.0425386	0.486923	0.97086	0.893196	1.05528	39.2514	0.000587691	-0.00702137	0.690052
HLA DR+ Natural Killer %Natural Killer || id:ebi-a-GCST90001649	Inflammatory bowel disease	MR Egger	16	-0.000974269	0.0827644	0.990774	0.999026	0.849428	1.17497	38.7921	0.000392704	NA	NA
HLA DR+ Natural Killer %Natural Killer || id:ebi-a-GCST90001649	Inflammatory bowel disease	Weighted median	16	-0.0159772	0.0376539	0.671335	0.98415	0.914133	1.05953	NA	NA	NA	NA
HLA DR+ Natural Killer %CD3- lymphocyte || id:ebi-a-GCST90001650	Inflammatory bowel disease	Inverse variance weighted	16	0.0263263	0.0369821	0.476547	1.02668	0.954891	1.10386	26.3191	0.0347991	0.00723943	0.598052
HLA DR+ Natural Killer %CD3- lymphocyte || id:ebi-a-GCST90001650	Inflammatory bowel disease	MR Egger	16	-0.00197521	0.0647145	0.976082	0.998027	0.879136	1.133	25.7832	0.0275783	NA	NA
HLA DR+ Natural Killer %CD3- lymphocyte || id:ebi-a-GCST90001650	Inflammatory bowel disease	Weighted median	16	0.0162197	0.0383246	0.672135	1.01635	0.942804	1.09564	NA	NA	NA	NA
Granulocyte Absolute Count || id:ebi-a-GCST90001651	Inflammatory bowel disease	Inverse variance weighted	17	-0.0669579	0.0536779	0.21225	0.935235	0.841839	1.03899	30.9234	0.0137627	0.0155461	0.533608
Granulocyte Absolute Count || id:ebi-a-GCST90001651	Inflammatory bowel disease	MR Egger	17	-0.167604	0.167158	0.331923	0.845689	0.609428	1.17354	30.1084	0.0115366	NA	NA
Granulocyte Absolute Count || id:ebi-a-GCST90001651	Inflammatory bowel disease	Weighted median	17	0.00164675	0.0581455	0.977406	1.00165	0.89376	1.12256	NA	NA	NA	NA
Granulocyte %leukocyte || id:ebi-a-GCST90001652	Inflammatory bowel disease	Inverse variance weighted	16	-0.0115628	0.038519	0.764037	0.988504	0.916622	1.06602	14.7249	0.471405	-0.00760698	0.772813
Granulocyte %leukocyte || id:ebi-a-GCST90001652	Inflammatory bowel disease	MR Egger	16	0.0392199	0.176965	0.827806	1.04	0.735186	1.47119	14.6344	0.403595	NA	NA
Granulocyte %leukocyte || id:ebi-a-GCST90001652	Inflammatory bowel disease	Weighted median	16	0.00182423	0.0525866	0.972327	1.00183	0.903711	1.11059	NA	NA	NA	NA
CD28- CD4-CD8- T cell %CD4-CD8- T cell || id:ebi-a-GCST90001653	Inflammatory bowel disease	Inverse variance weighted	22	-0.00850798	0.0336934	0.800646	0.991528	0.928164	1.05922	21.7578	0.413578	-0.0524597	0.0150562
CD28- CD4-CD8- T cell %CD4-CD8- T cell || id:ebi-a-GCST90001653	Inflammatory bowel disease	MR Egger	22	0.306015	0.122815	0.021614	1.358	1.06748	1.7276	14.6856	0.794105	NA	NA
CD28- CD4-CD8- T cell %CD4-CD8- T cell || id:ebi-a-GCST90001653	Inflammatory bowel disease	Weighted median	22	0.00788037	0.0503457	0.875619	1.00791	0.913203	1.11244	NA	NA	NA	NA
CD28- CD4-CD8- T cell Absolute Count || id:ebi-a-GCST90001654	Inflammatory bowel disease	Inverse variance weighted	27	-0.0194771	0.0346575	0.574125	0.980711	0.916305	1.04964	34.6339	0.119795	-0.00736337	0.729994
CD28- CD4-CD8- T cell Absolute Count || id:ebi-a-GCST90001654	Inflammatory bowel disease	MR Egger	27	0.0242786	0.130229	0.853613	1.02458	0.793762	1.32251	34.466	0.0983171	NA	NA
CD28- CD4-CD8- T cell Absolute Count || id:ebi-a-GCST90001654	Inflammatory bowel disease	Weighted median	27	-0.0620917	0.0444054	0.162026	0.939797	0.86146	1.02526	NA	NA	NA	NA
CD28+ CD4-CD8- T cell %T cell || id:ebi-a-GCST90001655	Inflammatory bowel disease	Inverse variance weighted	20	-0.0697827	0.0643825	0.278419	0.932596	0.822035	1.05803	60.2052	3.59e-06	-0.0124896	0.775981
CD28+ CD4-CD8- T cell %T cell || id:ebi-a-GCST90001655	Inflammatory bowel disease	MR Egger	20	0.000989631	0.253729	0.996931	1.00099	0.608767	1.64592	59.9274	2.1e-06	NA	NA
CD28+ CD4-CD8- T cell %T cell || id:ebi-a-GCST90001655	Inflammatory bowel disease	Weighted median	20	-0.0740724	0.0637903	0.245566	0.928604	0.819467	1.05228	NA	NA	NA	NA
CD28+ CD4-CD8- T cell %CD4-CD8- T cell || id:ebi-a-GCST90001656	Inflammatory bowel disease	Inverse variance weighted	22	0.00850798	0.0336934	0.800646	1.00854	0.944093	1.0774	21.7578	0.413578	0.0524597	0.0150562
CD28+ CD4-CD8- T cell %CD4-CD8- T cell || id:ebi-a-GCST90001656	Inflammatory bowel disease	MR Egger	22	-0.306015	0.122815	0.021614	0.736375	0.578838	0.936788	14.6856	0.794105	NA	NA
CD28+ CD4-CD8- T cell %CD4-CD8- T cell || id:ebi-a-GCST90001656	Inflammatory bowel disease	Weighted median	22	-0.00788037	0.050378	0.875698	0.992151	0.898866	1.09512	NA	NA	NA	NA
CD28+ CD4-CD8- T cell Absolute Count || id:ebi-a-GCST90001657	Inflammatory bowel disease	Inverse variance weighted	8	-0.0319273	0.0864574	0.711917	0.968577	0.817599	1.14744	15.3818	0.0314048	0.0318757	0.490135
CD28+ CD4-CD8- T cell Absolute Count || id:ebi-a-GCST90001657	Inflammatory bowel disease	MR Egger	8	-0.228584	0.282161	0.448802	0.79566	0.457664	1.38327	14.1117	0.0284129	NA	NA
CD28+ CD4-CD8- T cell Absolute Count || id:ebi-a-GCST90001657	Inflammatory bowel disease	Weighted median	8	0.00209452	0.0838445	0.98007	1.0021	0.850237	1.18108	NA	NA	NA	NA
CD39+ CD4+ T cell %T cell || id:ebi-a-GCST90001658	Inflammatory bowel disease	Inverse variance weighted	19	-0.00158407	0.0310044	0.959252	0.998417	0.939551	1.06097	27.0467	0.0781229	0.00183511	0.903027
CD39+ CD4+ T cell %T cell || id:ebi-a-GCST90001658	Inflammatory bowel disease	MR Egger	19	-0.0100657	0.0756338	0.895689	0.989985	0.853587	1.14818	27.0224	0.0577396	NA	NA
CD39+ CD4+ T cell %T cell || id:ebi-a-GCST90001658	Inflammatory bowel disease	Weighted median	19	-0.0175416	0.0370726	0.636092	0.982611	0.913745	1.05667	NA	NA	NA	NA
CD39+ CD4+ T cell %CD4+ T cell || id:ebi-a-GCST90001659	Inflammatory bowel disease	Inverse variance weighted	14	-0.00169404	0.0274184	0.950734	0.998307	0.946074	1.05342	9.57779	0.728042	0.00771835	0.596578
CD39+ CD4+ T cell %CD4+ T cell || id:ebi-a-GCST90001659	Inflammatory bowel disease	MR Egger	14	-0.0333818	0.0644052	0.613666	0.967169	0.852471	1.0973	9.28214	0.678662	NA	NA
CD39+ CD4+ T cell %CD4+ T cell || id:ebi-a-GCST90001659	Inflammatory bowel disease	Weighted median	14	-0.0173746	0.037308	0.641425	0.982775	0.913476	1.05733	NA	NA	NA	NA
CD39+ CD4+ T cell Absolute Count || id:ebi-a-GCST90001660	Inflammatory bowel disease	Inverse variance weighted	21	0.0337837	0.0243057	0.164544	1.03436	0.98624	1.08483	17.3335	0.631225	0.0328587	0.0248071
CD39+ CD4+ T cell Absolute Count || id:ebi-a-GCST90001660	Inflammatory bowel disease	MR Egger	21	-0.102669	0.0610367	0.108917	0.902426	0.800675	1.01711	11.3938	0.90988	NA	NA
CD39+ CD4+ T cell Absolute Count || id:ebi-a-GCST90001660	Inflammatory bowel disease	Weighted median	21	0.0323278	0.0367606	0.379177	1.03286	0.961056	1.11002	NA	NA	NA	NA
CD28- CD8dim T cell %T cell || id:ebi-a-GCST90001661	Inflammatory bowel disease	Inverse variance weighted	18	0.0199417	0.0436234	0.647575	1.02014	0.936543	1.1112	25.2671	0.088889	0.00370872	0.872488
CD28- CD8dim T cell %T cell || id:ebi-a-GCST90001661	Inflammatory bowel disease	MR Egger	18	-0.00245755	0.144503	0.986641	0.997545	0.7515	1.32415	25.2252	0.0659533	NA	NA
CD28- CD8dim T cell %T cell || id:ebi-a-GCST90001661	Inflammatory bowel disease	Weighted median	18	-0.0137852	0.0520708	0.79121	0.986309	0.890614	1.09229	NA	NA	NA	NA
CD28- CD8dim T cell %CD8dim T cell || id:ebi-a-GCST90001662	Inflammatory bowel disease	Inverse variance weighted	12	0.0244465	0.0521957	0.639525	1.02475	0.925097	1.13513	13.2647	0.27638	-0.0302516	0.387347
CD28- CD8dim T cell %CD8dim T cell || id:ebi-a-GCST90001662	Inflammatory bowel disease	MR Egger	12	0.213075	0.215237	0.345545	1.23748	0.811566	1.88691	12.2629	0.267845	NA	NA
CD28- CD8dim T cell %CD8dim T cell || id:ebi-a-GCST90001662	Inflammatory bowel disease	Weighted median	12	0.0107229	0.0704508	0.879025	1.01078	0.880416	1.16045	NA	NA	NA	NA
CD28- CD8dim T cell Absolute Count || id:ebi-a-GCST90001663	Inflammatory bowel disease	Inverse variance weighted	16	-0.0544188	0.0349755	0.119729	0.947035	0.884289	1.01423	13.6011	0.555973	0.00319854	0.875763
CD28- CD8dim T cell Absolute Count || id:ebi-a-GCST90001663	Inflammatory bowel disease	MR Egger	16	-0.0728472	0.120905	0.556465	0.929743	0.733578	1.17836	13.5757	0.481773	NA	NA
CD28- CD8dim T cell Absolute Count || id:ebi-a-GCST90001663	Inflammatory bowel disease	Weighted median	16	-0.0782982	0.0481364	0.103824	0.924689	0.841436	1.01618	NA	NA	NA	NA
CD28+ CD45RA+ CD8dim T cell %T cell || id:ebi-a-GCST90001664	Inflammatory bowel disease	Inverse variance weighted	16	0.0102354	0.0695744	0.883042	1.01029	0.8815	1.15789	51.0668	8.05e-06	0.0444972	0.316356
CD28+ CD45RA+ CD8dim T cell %T cell || id:ebi-a-GCST90001664	Inflammatory bowel disease	MR Egger	16	-0.281323	0.289031	0.346906	0.754784	0.428346	1.33	47.4101	1.65e-05	NA	NA
CD28+ CD45RA+ CD8dim T cell %T cell || id:ebi-a-GCST90001664	Inflammatory bowel disease	Weighted median	16	-0.0603293	0.0628379	0.337016	0.941454	0.832359	1.06485	NA	NA	NA	NA
CD28+ CD45RA+ CD8dim T cell %CD8dim T cell || id:ebi-a-GCST90001665	Inflammatory bowel disease	Inverse variance weighted	15	-0.0284622	0.0480365	0.553507	0.971939	0.884605	1.06789	22.6645	0.0659523	0.00284698	0.928154
CD28+ CD45RA+ CD8dim T cell %CD8dim T cell || id:ebi-a-GCST90001665	Inflammatory bowel disease	MR Egger	15	-0.0460218	0.197401	0.819284	0.955021	0.648608	1.40619	22.6498	0.0460759	NA	NA
CD28+ CD45RA+ CD8dim T cell %CD8dim T cell || id:ebi-a-GCST90001665	Inflammatory bowel disease	Weighted median	15	-0.0189828	0.0582972	0.744711	0.981196	0.87525	1.09997	NA	NA	NA	NA
CD28+ CD45RA+ CD8dim T cell Absolute Count || id:ebi-a-GCST90001666	Inflammatory bowel disease	Inverse variance weighted	14	-0.0541804	0.0470925	0.249934	0.947261	0.863741	1.03886	15.5041	0.27695	0.0110598	0.726262
CD28+ CD45RA+ CD8dim T cell Absolute Count || id:ebi-a-GCST90001666	Inflammatory bowel disease	MR Egger	14	-0.133989	0.22795	0.567562	0.874599	0.559467	1.36724	15.3399	0.223375	NA	NA
CD28+ CD45RA+ CD8dim T cell Absolute Count || id:ebi-a-GCST90001666	Inflammatory bowel disease	Weighted median	14	-0.0354597	0.0619267	0.56691	0.965162	0.854844	1.08972	NA	NA	NA	NA
CD28+ CD45RA- CD8dim T cell %T cell || id:ebi-a-GCST90001667	Inflammatory bowel disease	Inverse variance weighted	15	-0.063033	0.0604145	0.29679	0.938913	0.834064	1.05694	30.6086	0.00628648	-0.0366609	0.232529
CD28+ CD45RA- CD8dim T cell %T cell || id:ebi-a-GCST90001667	Inflammatory bowel disease	MR Egger	15	0.170039	0.195314	0.399768	1.18535	0.808337	1.73821	27.3137	0.0112662	NA	NA
CD28+ CD45RA- CD8dim T cell %T cell || id:ebi-a-GCST90001667	Inflammatory bowel disease	Weighted median	15	-0.0791916	0.0638285	0.214719	0.923863	0.815221	1.04698	NA	NA	NA	NA
CD28+ CD45RA- CD8dim T cell %CD8dim T cell || id:ebi-a-GCST90001668	Inflammatory bowel disease	Inverse variance weighted	18	-0.0142588	0.0441037	0.746467	0.985842	0.904202	1.07485	23.076	0.146793	0.0377415	0.159404
CD28+ CD45RA- CD8dim T cell %CD8dim T cell || id:ebi-a-GCST90001668	Inflammatory bowel disease	MR Egger	18	-0.252792	0.167162	0.149967	0.776629	0.559658	1.07772	20.3111	0.206533	NA	NA
CD28+ CD45RA- CD8dim T cell %CD8dim T cell || id:ebi-a-GCST90001668	Inflammatory bowel disease	Weighted median	18	0.00579133	0.0546407	0.915591	1.00581	0.903658	1.11951	NA	NA	NA	NA
CD28+ CD45RA- CD8dim T cell Absolute Count || id:ebi-a-GCST90001669	Inflammatory bowel disease	Inverse variance weighted	13	0.0607326	0.0438	0.165567	1.06261	0.975197	1.15787	6.37549	0.895984	0.00407493	0.833695
CD28+ CD45RA- CD8dim T cell Absolute Count || id:ebi-a-GCST90001669	Inflammatory bowel disease	MR Egger	13	0.036449	0.121138	0.769111	1.03712	0.817927	1.31506	6.32926	0.850517	NA	NA
CD28+ CD45RA- CD8dim T cell Absolute Count || id:ebi-a-GCST90001669	Inflammatory bowel disease	Weighted median	13	0.0406452	0.0594074	0.493863	1.04148	0.927008	1.17009	NA	NA	NA	NA
CD39+ CD8+ T cell %T cell || id:ebi-a-GCST90001670	Inflammatory bowel disease	Inverse variance weighted	15	0.0271692	0.0303808	0.371167	1.02754	0.968141	1.09059	10.0117	0.761325	0.00787563	0.532141
CD39+ CD8+ T cell %T cell || id:ebi-a-GCST90001670	Inflammatory bowel disease	MR Egger	15	-2.22e-05	0.0521331	0.999666	0.999978	0.902846	1.10756	9.5998	0.726287	NA	NA
CD39+ CD8+ T cell %T cell || id:ebi-a-GCST90001670	Inflammatory bowel disease	Weighted median	15	0.00617506	0.0427561	0.885165	1.00619	0.92531	1.09415	NA	NA	NA	NA
CD39+ CD8+ T cell %CD8+ T cell || id:ebi-a-GCST90001671	Inflammatory bowel disease	Inverse variance weighted	16	0.00499877	0.031281	0.873037	1.00501	0.945244	1.06856	16.5944	0.343682	-0.0111961	0.453977
CD39+ CD8+ T cell %CD8+ T cell || id:ebi-a-GCST90001671	Inflammatory bowel disease	MR Egger	16	0.0426687	0.0582909	0.476248	1.04359	0.93092	1.1699	15.9198	0.318294	NA	NA
CD39+ CD8+ T cell %CD8+ T cell || id:ebi-a-GCST90001671	Inflammatory bowel disease	Weighted median	16	0.00522589	0.0414934	0.899775	1.00524	0.926722	1.09041	NA	NA	NA	NA
CD39+ CD8+ T cell Absolute Count || id:ebi-a-GCST90001672	Inflammatory bowel disease	Inverse variance weighted	17	0.000386742	0.0276635	0.988846	1.00039	0.94759	1.05613	14.9382	0.529168	0.00736551	0.562509
CD39+ CD8+ T cell Absolute Count || id:ebi-a-GCST90001672	Inflammatory bowel disease	MR Egger	17	-0.0240159	0.0496288	0.635438	0.97627	0.885779	1.07601	14.5875	0.48152	NA	NA
CD39+ CD8+ T cell Absolute Count || id:ebi-a-GCST90001672	Inflammatory bowel disease	Weighted median	17	-0.00186074	0.0374449	0.960367	0.998141	0.927509	1.07415	NA	NA	NA	NA
CD28- CD127- CD25++ CD8+ T cell %T cell || id:ebi-a-GCST90001673	Inflammatory bowel disease	Inverse variance weighted	14	-0.0440448	0.040789	0.280222	0.956911	0.883388	1.03655	8.968	0.775356	0.00448906	0.834985
CD28- CD127- CD25++ CD8+ T cell %T cell || id:ebi-a-GCST90001673	Inflammatory bowel disease	MR Egger	14	-0.0707139	0.131744	0.601249	0.931728	0.719692	1.20624	8.92268	0.70952	NA	NA
CD28- CD127- CD25++ CD8+ T cell %T cell || id:ebi-a-GCST90001673	Inflammatory bowel disease	Weighted median	14	-0.0467835	0.0543236	0.389128	0.954294	0.857909	1.06151	NA	NA	NA	NA
CD28- CD127- CD25++ CD8+ T cell %CD8+ T cell || id:ebi-a-GCST90001674	Inflammatory bowel disease	Inverse variance weighted	14	-0.0467957	0.0403632	0.246307	0.954282	0.881696	1.03284	12.7937	0.46387	-0.00505022	0.867362
CD28- CD127- CD25++ CD8+ T cell %CD8+ T cell || id:ebi-a-GCST90001674	Inflammatory bowel disease	MR Egger	14	-0.0179212	0.174273	0.919793	0.982238	0.698028	1.38217	12.7627	0.386519	NA	NA
CD28- CD127- CD25++ CD8+ T cell %CD8+ T cell || id:ebi-a-GCST90001674	Inflammatory bowel disease	Weighted median	14	-0.030031	0.0577417	0.602999	0.970415	0.866577	1.0867	NA	NA	NA	NA
CD28- CD127- CD25++ CD8+ T cell Absolute Count || id:ebi-a-GCST90001675	Inflammatory bowel disease	Inverse variance weighted	21	-0.0515507	0.0338705	0.128011	0.949755	0.888752	1.01495	15.2498	0.761939	0.00168085	0.928734
CD28- CD127- CD25++ CD8+ T cell Absolute Count || id:ebi-a-GCST90001675	Inflammatory bowel disease	MR Egger	21	-0.0620469	0.120663	0.613029	0.939839	0.741896	1.19059	15.2416	0.707123	NA	NA
CD28- CD127- CD25++ CD8+ T cell Absolute Count || id:ebi-a-GCST90001675	Inflammatory bowel disease	Weighted median	21	-0.0483938	0.0469369	0.302522	0.952759	0.869019	1.04457	NA	NA	NA	NA
CD28- CD25++ CD8+ T cell %T cell || id:ebi-a-GCST90001676	Inflammatory bowel disease	Inverse variance weighted	5	-0.0347919	0.0615078	0.571632	0.965806	0.856118	1.08955	0.551571	0.96829	0.00185689	0.94667
CD28- CD25++ CD8+ T cell %T cell || id:ebi-a-GCST90001676	Inflammatory bowel disease	MR Egger	5	-0.0466128	0.173985	0.806132	0.954457	0.678667	1.34232	0.546295	0.908609	NA	NA
CD28- CD25++ CD8+ T cell %T cell || id:ebi-a-GCST90001676	Inflammatory bowel disease	Weighted median	5	-0.0448502	0.0743037	0.546105	0.956141	0.826558	1.10604	NA	NA	NA	NA
CD28- CD25++ CD8+ T cell %CD8+ T cell || id:ebi-a-GCST90001677	Inflammatory bowel disease	Inverse variance weighted	15	0.0448916	0.0418303	0.283189	1.04591	0.963584	1.13528	7.55635	0.911136	0.00499834	0.848072
CD28- CD25++ CD8+ T cell %CD8+ T cell || id:ebi-a-GCST90001677	Inflammatory bowel disease	MR Egger	15	0.00770012	0.194842	0.969076	1.00773	0.687846	1.47638	7.51816	0.873515	NA	NA
CD28- CD25++ CD8+ T cell %CD8+ T cell || id:ebi-a-GCST90001677	Inflammatory bowel disease	Weighted median	15	0.0522392	0.056905	0.358615	1.05363	0.942429	1.17795	NA	NA	NA	NA
CD28- CD25++ CD8+ T cell Absolute Count || id:ebi-a-GCST90001678	Inflammatory bowel disease	Inverse variance weighted	12	-0.0581754	0.0465148	0.211049	0.943484	0.861272	1.03354	6.96758	0.801703	-0.032766	0.244155
CD28- CD25++ CD8+ T cell Absolute Count || id:ebi-a-GCST90001678	Inflammatory bowel disease	MR Egger	12	0.123323	0.153859	0.441456	1.13125	0.83674	1.52942	5.43606	0.860213	NA	NA
CD28- CD25++ CD8+ T cell Absolute Count || id:ebi-a-GCST90001678	Inflammatory bowel disease	Weighted median	12	-0.0507387	0.0608587	0.404442	0.950527	0.843646	1.07095	NA	NA	NA	NA
CD25++ CD8+ T cell %T cell || id:ebi-a-GCST90001679	Inflammatory bowel disease	Inverse variance weighted	10	-0.0668619	0.0451357	0.138512	0.935324	0.856134	1.02184	3.75306	0.926901	-0.0201786	0.418429
CD25++ CD8+ T cell %T cell || id:ebi-a-GCST90001679	Inflammatory bowel disease	MR Egger	10	0.0444435	0.138063	0.755773	1.04545	0.79759	1.37032	3.02534	0.932758	NA	NA
CD25++ CD8+ T cell %T cell || id:ebi-a-GCST90001679	Inflammatory bowel disease	Weighted median	10	-0.059736	0.0598899	0.318556	0.942013	0.837679	1.05934	NA	NA	NA	NA
CD25++ CD8+ T cell %CD8+ T cell || id:ebi-a-GCST90001680	Inflammatory bowel disease	Inverse variance weighted	17	0.0226363	0.0351263	0.5193	1.02289	0.95484	1.0958	11.4458	0.781166	-0.018964	0.2621
CD25++ CD8+ T cell %CD8+ T cell || id:ebi-a-GCST90001680	Inflammatory bowel disease	MR Egger	17	0.125684	0.095152	0.206341	1.13392	0.940998	1.3664	10.0879	0.814172	NA	NA
CD25++ CD8+ T cell %CD8+ T cell || id:ebi-a-GCST90001680	Inflammatory bowel disease	Weighted median	17	0.0403584	0.0493862	0.413815	1.04118	0.945124	1.14701	NA	NA	NA	NA
CD25++ CD8+ T cell Absolute Count || id:ebi-a-GCST90001681	Inflammatory bowel disease	Inverse variance weighted	21	0.040101	0.0309618	0.19526	1.04092	0.979626	1.10604	20.7334	0.412971	0.00741898	0.691843
CD25++ CD8+ T cell Absolute Count || id:ebi-a-GCST90001681	Inflammatory bowel disease	MR Egger	21	0.00148829	0.101024	0.9884	1.00149	0.821587	1.22079	20.5582	0.36172	NA	NA
CD25++ CD8+ T cell Absolute Count || id:ebi-a-GCST90001681	Inflammatory bowel disease	Weighted median	21	0.0195801	0.0438751	0.655403	1.01977	0.935742	1.11135	NA	NA	NA	NA
CD127- CD8+ T cell %T cell || id:ebi-a-GCST90001682	Inflammatory bowel disease	Inverse variance weighted	9	0.0416035	0.0531248	0.433552	1.04248	0.939393	1.15688	8.58105	0.37886	-0.0500272	0.1732
CD127- CD8+ T cell %T cell || id:ebi-a-GCST90001682	Inflammatory bowel disease	MR Egger	9	0.330952	0.197587	0.137849	1.39229	0.945239	2.05078	6.28157	0.507284	NA	NA
CD127- CD8+ T cell %T cell || id:ebi-a-GCST90001682	Inflammatory bowel disease	Weighted median	9	-0.00120872	0.0698582	0.986195	0.998792	0.870985	1.14535	NA	NA	NA	NA
CD127- CD8+ T cell %CD8+ T cell || id:ebi-a-GCST90001683	Inflammatory bowel disease	Inverse variance weighted	9	0.00791419	0.0535592	0.882528	1.00795	0.9075	1.11951	4.17568	0.840935	0.0206108	0.683444
CD127- CD8+ T cell %CD8+ T cell || id:ebi-a-GCST90001683	Inflammatory bowel disease	MR Egger	9	-0.138162	0.347682	0.702926	0.870958	0.4406	1.72167	3.99487	0.780368	NA	NA
CD127- CD8+ T cell %CD8+ T cell || id:ebi-a-GCST90001683	Inflammatory bowel disease	Weighted median	9	0.0283965	0.067259	0.672882	1.0288	0.901738	1.17377	NA	NA	NA	NA
CD127- CD8+ T cell Absolute Count || id:ebi-a-GCST90001684	Inflammatory bowel disease	Inverse variance weighted	12	-0.106362	0.0775655	0.170295	0.899099	0.772294	1.04672	39.137	5.02e-05	0.0946383	0.0224957
CD127- CD8+ T cell Absolute Count || id:ebi-a-GCST90001684	Inflammatory bowel disease	MR Egger	12	-0.700884	0.229105	0.0120604	0.496147	0.316659	0.777371	22.6692	0.0120358	NA	NA
CD127- CD8+ T cell Absolute Count || id:ebi-a-GCST90001684	Inflammatory bowel disease	Weighted median	12	0.00828818	0.0651138	0.898713	1.00832	0.887511	1.14558	NA	NA	NA	NA
CD28- CD8+ T cell %T cell || id:ebi-a-GCST90001685	Inflammatory bowel disease	Inverse variance weighted	13	0.0312874	0.0425997	0.462674	1.03178	0.949131	1.12163	12.2253	0.427761	-0.00330447	0.899682
CD28- CD8+ T cell %T cell || id:ebi-a-GCST90001685	Inflammatory bowel disease	MR Egger	13	0.0492769	0.146364	0.742699	1.05051	0.78852	1.39955	12.2068	0.348301	NA	NA
CD28- CD8+ T cell %T cell || id:ebi-a-GCST90001685	Inflammatory bowel disease	Weighted median	13	-0.0120729	0.0575297	0.833781	0.988	0.882646	1.10593	NA	NA	NA	NA
CD28- CD8+ T cell %CD8+ T cell || id:ebi-a-GCST90001686	Inflammatory bowel disease	Inverse variance weighted	17	0.0641715	0.0508125	0.206622	1.06628	0.965199	1.17794	22.6032	0.12476	0.00390165	0.883213
CD28- CD8+ T cell %CD8+ T cell || id:ebi-a-GCST90001686	Inflammatory bowel disease	MR Egger	17	0.0382616	0.181159	0.835571	1.039	0.728468	1.48191	22.5696	0.0937152	NA	NA
CD28- CD8+ T cell %CD8+ T cell || id:ebi-a-GCST90001686	Inflammatory bowel disease	Weighted median	17	0.0116718	0.0623015	0.851391	1.01174	0.895441	1.14314	NA	NA	NA	NA
CD28- CD8+ T cell Absolute Count || id:ebi-a-GCST90001687	Inflammatory bowel disease	Inverse variance weighted	12	0.0494261	0.0482786	0.305944	1.05067	0.955806	1.15494	12.0832	0.357419	-0.00732822	0.80593
CD28- CD8+ T cell Absolute Count || id:ebi-a-GCST90001687	Inflammatory bowel disease	MR Egger	12	0.0925308	0.178156	0.614796	1.09695	0.773635	1.55538	12.0068	0.2846	NA	NA
CD28- CD8+ T cell Absolute Count || id:ebi-a-GCST90001687	Inflammatory bowel disease	Weighted median	12	0.0488562	0.0663312	0.461397	1.05007	0.922053	1.19586	NA	NA	NA	NA
CD28+ CD45RA+ CD8+ T cell %T cell || id:ebi-a-GCST90001688	Inflammatory bowel disease	Inverse variance weighted	14	-0.0106867	0.056234	0.849278	0.98937	0.886118	1.10465	8.61906	0.801067	-0.000758188	0.980708
CD28+ CD45RA+ CD8+ T cell %T cell || id:ebi-a-GCST90001688	Inflammatory bowel disease	MR Egger	14	-0.00387353	0.281616	0.989252	0.996134	0.573589	1.72995	8.61845	0.735128	NA	NA
CD28+ CD45RA+ CD8+ T cell %T cell || id:ebi-a-GCST90001688	Inflammatory bowel disease	Weighted median	14	-0.0190292	0.0739759	0.796997	0.981151	0.848723	1.13424	NA	NA	NA	NA
CD28+ CD45RA+ CD8+ T cell %CD8+ T cell || id:ebi-a-GCST90001689	Inflammatory bowel disease	Inverse variance weighted	14	-0.031643	0.0556216	0.569426	0.968852	0.868784	1.08045	14.1537	0.363107	6.4e-05	0.998247
CD28+ CD45RA+ CD8+ T cell %CD8+ T cell || id:ebi-a-GCST90001689	Inflammatory bowel disease	MR Egger	14	-0.0322011	0.255446	0.901773	0.968312	0.586915	1.59755	14.1537	0.290999	NA	NA
CD28+ CD45RA+ CD8+ T cell %CD8+ T cell || id:ebi-a-GCST90001689	Inflammatory bowel disease	Weighted median	14	0.0183647	0.0707793	0.795277	1.01853	0.886599	1.1701	NA	NA	NA	NA
CD28+ CD45RA+ CD8+ T cell Absolute Count || id:ebi-a-GCST90001690	Inflammatory bowel disease	Inverse variance weighted	20	0.0348481	0.0502747	0.488213	1.03546	0.938296	1.14269	23.3965	0.220328	-0.0227041	0.273762
CD28+ CD45RA+ CD8+ T cell Absolute Count || id:ebi-a-GCST90001690	Inflammatory bowel disease	MR Egger	20	0.21954	0.171049	0.215597	1.2455	0.890729	1.74158	21.8495	0.238733	NA	NA
CD28+ CD45RA+ CD8+ T cell Absolute Count || id:ebi-a-GCST90001690	Inflammatory bowel disease	Weighted median	20	0.0604571	0.0673748	0.369545	1.06232	0.930906	1.21229	NA	NA	NA	NA
CD28+ CD45RA- CD8+ T cell %T cell || id:ebi-a-GCST90001691	Inflammatory bowel disease	Inverse variance weighted	13	0.0479765	0.0657812	0.465797	1.04915	0.922236	1.19352	36.2244	0.00029815	0.00542508	0.853632
CD28+ CD45RA- CD8+ T cell %T cell || id:ebi-a-GCST90001691	Inflammatory bowel disease	MR Egger	13	0.0169177	0.178176	0.926062	1.01706	0.717268	1.44216	36.1073	0.000162422	NA	NA
CD28+ CD45RA- CD8+ T cell %T cell || id:ebi-a-GCST90001691	Inflammatory bowel disease	Weighted median	13	0.0269989	0.0591334	0.647975	1.02737	0.914935	1.15361	NA	NA	NA	NA
CD28+ CD45RA- CD8+ T cell %CD8+ T cell || id:ebi-a-GCST90001692	Inflammatory bowel disease	Inverse variance weighted	18	-0.00792434	0.0388633	0.838429	0.992107	0.919343	1.07063	20.671	0.241351	0.017974	0.458003
CD28+ CD45RA- CD8+ T cell %CD8+ T cell || id:ebi-a-GCST90001692	Inflammatory bowel disease	MR Egger	18	-0.119973	0.152496	0.442939	0.886944	0.657792	1.19592	19.9499	0.222487	NA	NA
CD28+ CD45RA- CD8+ T cell %CD8+ T cell || id:ebi-a-GCST90001692	Inflammatory bowel disease	Weighted median	18	0.0393032	0.0508052	0.439163	1.04009	0.941506	1.14899	NA	NA	NA	NA
CD28+ CD45RA- CD8+ T cell Absolute Count || id:ebi-a-GCST90001693	Inflammatory bowel disease	Inverse variance weighted	18	-0.00349226	0.0330066	0.915737	0.996514	0.934088	1.06311	10.0684	0.900716	-0.0161577	0.418142
CD28+ CD45RA- CD8+ T cell Absolute Count || id:ebi-a-GCST90001693	Inflammatory bowel disease	MR Egger	18	0.0933392	0.121094	0.452057	1.09783	0.865884	1.39192	9.37768	0.897049	NA	NA
CD28+ CD45RA- CD8+ T cell Absolute Count || id:ebi-a-GCST90001693	Inflammatory bowel disease	Weighted median	18	-0.0237428	0.0426976	0.578164	0.976537	0.898139	1.06178	NA	NA	NA	NA
CD28- CD4-CD8- T cell %T cell || id:ebi-a-GCST90001694	Inflammatory bowel disease	Inverse variance weighted	21	0.035489	0.0336662	0.291818	1.03613	0.969963	1.1068	22.5227	0.312836	-0.00870969	0.704834
CD28- CD4-CD8- T cell %T cell || id:ebi-a-GCST90001694	Inflammatory bowel disease	MR Egger	21	0.0807595	0.122645	0.518131	1.08411	0.852463	1.3787	22.3487	0.267247	NA	NA
CD28- CD4-CD8- T cell %T cell || id:ebi-a-GCST90001694	Inflammatory bowel disease	Weighted median	21	0.0531337	0.0449726	0.237417	1.05457	0.965593	1.15175	NA	NA	NA	NA
CD45RA- CD28- CD8+ T cell Absolute Count || id:ebi-a-GCST90001695	Inflammatory bowel disease	Inverse variance weighted	15	-0.000227683	0.000456522	0.617967	0.999772	0.998878	1.00067	19.3116	0.15338	-0.0266252	0.328785
CD45RA- CD28- CD8+ T cell Absolute Count || id:ebi-a-GCST90001695	Inflammatory bowel disease	MR Egger	15	0.00102874	0.00131959	0.449591	1.00103	0.998444	1.00362	17.8945	0.161567	NA	NA
CD45RA- CD28- CD8+ T cell Absolute Count || id:ebi-a-GCST90001695	Inflammatory bowel disease	Weighted median	15	-0.000501408	0.000537421	0.350826	0.999499	0.998446	1.00055	NA	NA	NA	NA
CD45RA- CD28- CD8+ T cell %CD8+ T cell || id:ebi-a-GCST90001696	Inflammatory bowel disease	Inverse variance weighted	10	-0.00107375	0.00423471	0.799837	0.998927	0.99067	1.00725	17.153	0.0463737	-0.0296395	0.333296
CD45RA- CD28- CD8+ T cell %CD8+ T cell || id:ebi-a-GCST90001696	Inflammatory bowel disease	MR Egger	10	0.0119441	0.0133289	0.396358	1.01202	0.98592	1.0388	15.1458	0.0563716	NA	NA
CD45RA- CD28- CD8+ T cell %CD8+ T cell || id:ebi-a-GCST90001696	Inflammatory bowel disease	Weighted median	10	0.00267888	0.00420544	0.524123	1.00268	0.994452	1.01098	NA	NA	NA	NA
CD45RA- CD28- CD8+ T cell %T cell || id:ebi-a-GCST90001697	Inflammatory bowel disease	Inverse variance weighted	13	0.00708043	0.0086895	0.415172	1.00711	0.990098	1.0244	10.5494	0.567878	-0.0403769	0.20846
CD45RA- CD28- CD8+ T cell %T cell || id:ebi-a-GCST90001697	Inflammatory bowel disease	MR Egger	13	0.0481579	0.031946	0.159857	1.04934	0.985648	1.11714	8.76389	0.643676	NA	NA
CD45RA- CD28- CD8+ T cell %T cell || id:ebi-a-GCST90001697	Inflammatory bowel disease	Weighted median	13	0.00866727	0.011887	0.465918	1.0087	0.985475	1.03248	NA	NA	NA	NA
CD45RA+ CD28- CD8+ T cell Absolute Count || id:ebi-a-GCST90001698	Inflammatory bowel disease	Inverse variance weighted	22	0.000420897	0.000284752	0.139377	1.00042	0.999863	1.00098	19.8304	0.532024	0.0994321	0.146934
CD45RA+ CD28- CD8+ T cell Absolute Count || id:ebi-a-GCST90001698	Inflammatory bowel disease	MR Egger	22	-0.0020602	0.00166867	0.231276	0.997942	0.994683	1.00121	17.5533	0.616807	NA	NA
CD45RA+ CD28- CD8+ T cell Absolute Count || id:ebi-a-GCST90001698	Inflammatory bowel disease	Weighted median	22	0.000654918	0.000409027	0.109342	1.00066	0.999853	1.00146	NA	NA	NA	NA
CD45RA+ CD28- CD8+ T cell %CD8+ T cell || id:ebi-a-GCST90001699	Inflammatory bowel disease	Inverse variance weighted	12	0.00452598	0.0034274	0.186659	1.00454	0.997811	1.01131	15.6615	0.154168	-0.0203277	0.490815
CD45RA+ CD28- CD8+ T cell %CD8+ T cell || id:ebi-a-GCST90001699	Inflammatory bowel disease	MR Egger	12	0.012977	0.0123247	0.317151	1.01306	0.988883	1.03783	14.8993	0.135776	NA	NA
CD45RA+ CD28- CD8+ T cell %CD8+ T cell || id:ebi-a-GCST90001699	Inflammatory bowel disease	Weighted median	12	0.00359143	0.00422621	0.395436	1.0036	0.995319	1.01195	NA	NA	NA	NA
CD45RA+ CD28- CD8+ T cell %T cell || id:ebi-a-GCST90001700	Inflammatory bowel disease	Inverse variance weighted	12	0.0049036	0.0120571	0.684229	1.00492	0.981446	1.02895	30.2166	0.00146509	0.0236186	0.552649
CD45RA+ CD28- CD8+ T cell %T cell || id:ebi-a-GCST90001700	Inflammatory bowel disease	MR Egger	12	-0.0178302	0.0390263	0.657523	0.982328	0.90999	1.06042	29.1173	0.0011927	NA	NA
CD45RA+ CD28- CD8+ T cell %T cell || id:ebi-a-GCST90001700	Inflammatory bowel disease	Weighted median	12	0.00206318	0.011608	0.858929	1.00207	0.979524	1.02513	NA	NA	NA	NA
BAFF-R on CD20- CD38- B cell || id:ebi-a-GCST90001701	Inflammatory bowel disease	Inverse variance weighted	10	0.0237841	0.0395634	0.547731	1.02407	0.947659	1.10664	6.4058	0.698717	0.00231957	0.91814
BAFF-R on CD20- CD38- B cell || id:ebi-a-GCST90001701	Inflammatory bowel disease	MR Egger	10	0.0157712	0.0852779	0.857879	1.0159	0.859527	1.20071	6.39455	0.603126	NA	NA
BAFF-R on CD20- CD38- B cell || id:ebi-a-GCST90001701	Inflammatory bowel disease	Weighted median	10	0.00424104	0.0481194	0.929769	1.00425	0.913864	1.10358	NA	NA	NA	NA
BAFF-R on CD24+ CD27+ B cell || id:ebi-a-GCST90001702	Inflammatory bowel disease	Inverse variance weighted	13	0.0315318	0.043591	0.469461	1.03203	0.947521	1.12409	61.1561	1.39e-08	0.0316113	0.197725
BAFF-R on CD24+ CD27+ B cell || id:ebi-a-GCST90001702	Inflammatory bowel disease	MR Egger	13	-0.0197327	0.056292	0.732553	0.980461	0.878038	1.09483	52.2321	2.47e-07	NA	NA
BAFF-R on CD24+ CD27+ B cell || id:ebi-a-GCST90001702	Inflammatory bowel disease	Weighted median	13	0.0157826	0.0210072	0.452476	1.01591	0.974928	1.05861	NA	NA	NA	NA
BAFF-R on IgD+ CD24+ B cell || id:ebi-a-GCST90001703	Inflammatory bowel disease	Inverse variance weighted	11	0.0288703	0.048283	0.54988	1.02929	0.936351	1.13146	59.9073	3.77e-09	0.038336	0.21562
BAFF-R on IgD+ CD24+ B cell || id:ebi-a-GCST90001703	Inflammatory bowel disease	MR Egger	11	-0.0281087	0.0631962	0.666979	0.972283	0.859011	1.10049	50.0428	1.06e-07	NA	NA
BAFF-R on IgD+ CD24+ B cell || id:ebi-a-GCST90001703	Inflammatory bowel disease	Weighted median	11	0.014818	0.0223024	0.506426	1.01493	0.971519	1.06028	NA	NA	NA	NA
BAFF-R on IgD+ CD24- B cell || id:ebi-a-GCST90001704	Inflammatory bowel disease	Inverse variance weighted	16	0.0335234	0.0407257	0.410421	1.03409	0.954757	1.12002	70.7681	3.26e-09	0.0135298	0.483276
BAFF-R on IgD+ CD24- B cell || id:ebi-a-GCST90001704	Inflammatory bowel disease	MR Egger	16	0.00541312	0.0568961	0.925552	1.00543	0.899332	1.12404	68.2401	4.01e-09	NA	NA
BAFF-R on IgD+ CD24- B cell || id:ebi-a-GCST90001704	Inflammatory bowel disease	Weighted median	16	0.0167084	0.021161	0.42977	1.01685	0.975537	1.05991	NA	NA	NA	NA
BAFF-R on IgD+ CD38- B cell || id:ebi-a-GCST90001705	Inflammatory bowel disease	Inverse variance weighted	17	0.0363511	0.0378475	0.336822	1.03702	0.962877	1.11687	63.3395	1.42e-07	0.0265181	0.107077
BAFF-R on IgD+ CD38- B cell || id:ebi-a-GCST90001705	Inflammatory bowel disease	MR Egger	17	-0.0179707	0.047769	0.712036	0.98219	0.894404	1.07859	52.9641	3.91e-06	NA	NA
BAFF-R on IgD+ CD38- B cell || id:ebi-a-GCST90001705	Inflammatory bowel disease	Weighted median	17	0.0197636	0.0217821	0.36423	1.01996	0.977332	1.06445	NA	NA	NA	NA
BAFF-R on IgD+ CD38- naive B cell || id:ebi-a-GCST90001706	Inflammatory bowel disease	Inverse variance weighted	21	0.00120007	0.0152559	0.937301	1.0012	0.971707	1.03159	16.2251	0.702565	0.00299015	0.736637
BAFF-R on IgD+ CD38- naive B cell || id:ebi-a-GCST90001706	Inflammatory bowel disease	MR Egger	21	-0.00459213	0.0228208	0.842661	0.995418	0.951876	1.04095	16.1086	0.650019	NA	NA
BAFF-R on IgD+ CD38- naive B cell || id:ebi-a-GCST90001706	Inflammatory bowel disease	Weighted median	21	0.00119017	0.0199494	0.952427	1.00119	0.962799	1.04111	NA	NA	NA	NA
BAFF-R on IgD+ CD38- unswitched memory B cell || id:ebi-a-GCST90001707	Inflammatory bowel disease	Inverse variance weighted	14	0.0099194	0.0176844	0.574857	1.00997	0.975562	1.04559	6.67126	0.918289	0.00658018	0.591053
BAFF-R on IgD+ CD38- unswitched memory B cell || id:ebi-a-GCST90001707	Inflammatory bowel disease	MR Egger	14	-0.000222545	0.0255001	0.99318	0.999777	0.951037	1.05102	6.36651	0.896491	NA	NA
BAFF-R on IgD+ CD38- unswitched memory B cell || id:ebi-a-GCST90001707	Inflammatory bowel disease	Weighted median	14	0.00249979	0.0193553	0.897237	1.0025	0.965184	1.04126	NA	NA	NA	NA
BAFF-R on IgD+ CD38+ B cell || id:ebi-a-GCST90001708	Inflammatory bowel disease	Inverse variance weighted	18	0.0259759	0.036968	0.482267	1.02632	0.954582	1.10344	64.7816	1.67e-07	0.00829328	0.651855
BAFF-R on IgD+ CD38+ B cell || id:ebi-a-GCST90001708	Inflammatory bowel disease	MR Egger	18	0.00795932	0.0544844	0.885679	1.00799	0.905897	1.12159	63.9368	1.12e-07	NA	NA
BAFF-R on IgD+ CD38+ B cell || id:ebi-a-GCST90001708	Inflammatory bowel disease	Weighted median	18	0.0167558	0.0221934	0.450256	1.0169	0.973611	1.06211	NA	NA	NA	NA
BAFF-R on IgD+ CD38dim B cell || id:ebi-a-GCST90001709	Inflammatory bowel disease	Inverse variance weighted	16	0.0267449	0.0407183	0.511293	1.02711	0.94832	1.11244	72.5939	1.54e-09	0.0124009	0.54401
BAFF-R on IgD+ CD38dim B cell || id:ebi-a-GCST90001709	Inflammatory bowel disease	MR Egger	16	0.00157676	0.0580217	0.978703	1.00158	0.893914	1.12221	70.6424	1.48e-09	NA	NA
BAFF-R on IgD+ CD38dim B cell || id:ebi-a-GCST90001709	Inflammatory bowel disease	Weighted median	16	0.0158538	0.0210706	0.451802	1.01598	0.974876	1.05882	NA	NA	NA	NA
BAFF-R on IgD- CD24- B cell || id:ebi-a-GCST90001710	Inflammatory bowel disease	Inverse variance weighted	16	0.0408606	0.0387711	0.291933	1.04171	0.965479	1.12395	58.6753	4.25e-07	0.0264395	0.117161
BAFF-R on IgD- CD24- B cell || id:ebi-a-GCST90001710	Inflammatory bowel disease	MR Egger	16	-0.0130267	0.0488321	0.79354	0.987058	0.896966	1.0862	48.9305	9.21e-06	NA	NA
BAFF-R on IgD- CD24- B cell || id:ebi-a-GCST90001710	Inflammatory bowel disease	Weighted median	16	0.017301	0.0215849	0.422824	1.01745	0.975305	1.06142	NA	NA	NA	NA
BAFF-R on IgD- CD27- B cell || id:ebi-a-GCST90001711	Inflammatory bowel disease	Inverse variance weighted	14	0.0382294	0.0422782	0.365871	1.03897	0.956346	1.12873	58.0264	1.18e-07	0.0361517	0.0985585
BAFF-R on IgD- CD27- B cell || id:ebi-a-GCST90001711	Inflammatory bowel disease	MR Egger	14	-0.0261447	0.0531053	0.631378	0.974194	0.877893	1.08106	45.789	7.54e-06	NA	NA
BAFF-R on IgD- CD27- B cell || id:ebi-a-GCST90001711	Inflammatory bowel disease	Weighted median	14	0.018087	0.0218564	0.407932	1.01825	0.975552	1.06282	NA	NA	NA	NA
BAFF-R on IgD- CD38- B cell || id:ebi-a-GCST90001712	Inflammatory bowel disease	Inverse variance weighted	11	0.0421718	0.0463296	0.362687	1.04307	0.95253	1.14222	56.4984	1.66e-08	0.0734283	0.0102969
BAFF-R on IgD- CD38- B cell || id:ebi-a-GCST90001712	Inflammatory bowel disease	MR Egger	11	-0.0665733	0.04729	0.192789	0.935594	0.852773	1.02646	26.1526	0.00192873	NA	NA
BAFF-R on IgD- CD38- B cell || id:ebi-a-GCST90001712	Inflammatory bowel disease	Weighted median	11	0.0176343	0.0212646	0.406947	1.01779	0.976242	1.06111	NA	NA	NA	NA
BAFF-R on IgD- CD38+ B cell || id:ebi-a-GCST90001713	Inflammatory bowel disease	Inverse variance weighted	13	0.0165708	0.0365207	0.650018	1.01671	0.946476	1.09215	4.72367	0.966577	0.000336754	0.982009
BAFF-R on IgD- CD38+ B cell || id:ebi-a-GCST90001713	Inflammatory bowel disease	MR Egger	13	0.0150847	0.0740553	0.842312	1.0152	0.878039	1.17378	4.72314	0.94383	NA	NA
BAFF-R on IgD- CD38+ B cell || id:ebi-a-GCST90001713	Inflammatory bowel disease	Weighted median	13	0.0168249	0.0485918	0.729155	1.01697	0.924581	1.11859	NA	NA	NA	NA
BAFF-R on IgD- CD38dim B cell || id:ebi-a-GCST90001714	Inflammatory bowel disease	Inverse variance weighted	3	0.446295	0.200427	0.0259663	1.56251	1.05491	2.31436	15.7825	0.000373996	-0.254062	0.161155
BAFF-R on IgD- CD38dim B cell || id:ebi-a-GCST90001714	Inflammatory bowel disease	MR Egger	3	2.17524	0.452918	0.130687	8.80426	3.62378	21.3906	0.839622	0.359505	NA	NA
BAFF-R on IgD- CD38dim B cell || id:ebi-a-GCST90001714	Inflammatory bowel disease	Weighted median	3	0.256626	0.143718	0.0741611	1.29256	0.97525	1.71312	NA	NA	NA	NA
BAFF-R on memory B cell || id:ebi-a-GCST90001715	Inflammatory bowel disease	Inverse variance weighted	12	0.0375321	0.0452393	0.406745	1.03825	0.950149	1.13451	58.6224	1.67e-08	0.0465403	0.0744346
BAFF-R on memory B cell || id:ebi-a-GCST90001715	Inflammatory bowel disease	MR Egger	12	-0.0344676	0.0540279	0.537834	0.96612	0.869043	1.07404	41.9749	7.58e-06	NA	NA
BAFF-R on memory B cell || id:ebi-a-GCST90001715	Inflammatory bowel disease	Weighted median	12	0.0166074	0.0211555	0.432444	1.01675	0.975449	1.05979	NA	NA	NA	NA
BAFF-R on naive-mature B cell || id:ebi-a-GCST90001716	Inflammatory bowel disease	Inverse variance weighted	16	0.0373909	0.0375355	0.319178	1.0381	0.964468	1.11735	60.2961	2.24e-07	0.019994	0.308638
BAFF-R on naive-mature B cell || id:ebi-a-GCST90001716	Inflammatory bowel disease	MR Egger	16	-0.00278533	0.0533315	0.959086	0.997219	0.898243	1.1071	55.844	6.2e-07	NA	NA
BAFF-R on naive-mature B cell || id:ebi-a-GCST90001716	Inflammatory bowel disease	Weighted median	16	0.01632	0.0217438	0.452918	1.01645	0.974045	1.06071	NA	NA	NA	NA
BAFF-R on unswitched memory B cell || id:ebi-a-GCST90001717	Inflammatory bowel disease	Inverse variance weighted	15	0.0302032	0.0401516	0.451914	1.03066	0.952663	1.11505	62.2391	4.73e-08	0.0241871	0.221862
BAFF-R on unswitched memory B cell || id:ebi-a-GCST90001717	Inflammatory bowel disease	MR Egger	15	-0.0131292	0.0517836	0.803817	0.986957	0.8917	1.09239	55.2431	3.66e-07	NA	NA
BAFF-R on unswitched memory B cell || id:ebi-a-GCST90001717	Inflammatory bowel disease	Weighted median	15	0.015498	0.0214501	0.469978	1.01562	0.973805	1.05923	NA	NA	NA	NA
BAFF-R on switched memory B cell || id:ebi-a-GCST90001718	Inflammatory bowel disease	Inverse variance weighted	10	0.034813	0.0489139	0.476638	1.03543	0.940768	1.13961	55.8373	8.43e-09	0.0324489	0.252135
BAFF-R on switched memory B cell || id:ebi-a-GCST90001718	Inflammatory bowel disease	MR Egger	10	-0.0177568	0.0638373	0.787946	0.9824	0.86686	1.11334	46.9055	1.6e-07	NA	NA
BAFF-R on switched memory B cell || id:ebi-a-GCST90001718	Inflammatory bowel disease	Weighted median	10	0.0176408	0.021272	0.406936	1.0178	0.976235	1.06113	NA	NA	NA	NA
BAFF-R on IgD+ B cell || id:ebi-a-GCST90001719	Inflammatory bowel disease	Inverse variance weighted	17	0.0241508	0.0406355	0.552293	1.02444	0.946017	1.10937	75.9507	8.85e-10	0.00821102	0.668052
BAFF-R on IgD+ B cell || id:ebi-a-GCST90001719	Inflammatory bowel disease	MR Egger	17	0.00705908	0.0571493	0.903335	1.00708	0.900366	1.12645	74.9942	5.68e-10	NA	NA
BAFF-R on IgD+ B cell || id:ebi-a-GCST90001719	Inflammatory bowel disease	Weighted median	17	0.0161129	0.0220476	0.464888	1.01624	0.973263	1.06112	NA	NA	NA	NA
BAFF-R on transitional B cell || id:ebi-a-GCST90001720	Inflammatory bowel disease	Inverse variance weighted	16	0.0222042	0.0396002	0.574995	1.02245	0.946095	1.10497	64.0263	5.06e-08	0.00981801	0.586144
BAFF-R on transitional B cell || id:ebi-a-GCST90001720	Inflammatory bowel disease	MR Egger	16	0.00280013	0.0534431	0.958955	1.0028	0.903076	1.11354	62.6369	4.02e-08	NA	NA
BAFF-R on transitional B cell || id:ebi-a-GCST90001720	Inflammatory bowel disease	Weighted median	16	0.00845188	0.0222714	0.704321	1.00849	0.965412	1.05349	NA	NA	NA	NA
CD19 on CD20- B cell || id:ebi-a-GCST90001721	Inflammatory bowel disease	Inverse variance weighted	17	0.00603905	0.0563379	0.914636	1.00606	0.90088	1.12351	29.8219	0.0189478	-0.0396123	0.14493
CD19 on CD20- B cell || id:ebi-a-GCST90001721	Inflammatory bowel disease	MR Egger	17	0.265691	0.177299	0.154739	1.30433	0.921443	1.84632	25.7608	0.0406137	NA	NA
CD19 on CD20- B cell || id:ebi-a-GCST90001721	Inflammatory bowel disease	Weighted median	17	-0.0803608	0.057516	0.162356	0.922783	0.824406	1.0329	NA	NA	NA	NA
CD19 on CD20- CD38- B cell || id:ebi-a-GCST90001722	Inflammatory bowel disease	Inverse variance weighted	14	-0.00852019	0.0403837	0.832902	0.991516	0.916061	1.07319	10.0153	0.692681	-0.014942	0.50575
CD19 on CD20- CD38- B cell || id:ebi-a-GCST90001722	Inflammatory bowel disease	MR Egger	14	0.0741693	0.127123	0.570398	1.07699	0.839464	1.38172	9.54472	0.655833	NA	NA
CD19 on CD20- CD38- B cell || id:ebi-a-GCST90001722	Inflammatory bowel disease	Weighted median	14	0.0207445	0.056564	0.71381	1.02096	0.913821	1.14066	NA	NA	NA	NA
CD19 on CD24+ CD27+ B cell || id:ebi-a-GCST90001723	Inflammatory bowel disease	Inverse variance weighted	19	-0.0616625	0.0478829	0.197823	0.9402	0.855976	1.03271	36.4237	0.00622423	0.00779106	0.775726
CD19 on CD24+ CD27+ B cell || id:ebi-a-GCST90001723	Inflammatory bowel disease	MR Egger	19	-0.106808	0.163522	0.522383	0.898698	0.652261	1.23824	36.2451	0.00425321	NA	NA
CD19 on CD24+ CD27+ B cell || id:ebi-a-GCST90001723	Inflammatory bowel disease	Weighted median	19	0.0107593	0.050615	0.831662	1.01082	0.915352	1.11624	NA	NA	NA	NA
CD19 on IgD+ CD24+ B cell || id:ebi-a-GCST90001724	Inflammatory bowel disease	Inverse variance weighted	21	-0.0757018	0.0373573	0.0427211	0.927093	0.861636	0.997522	24.4575	0.222979	0.00251793	0.909092
CD19 on IgD+ CD24+ B cell || id:ebi-a-GCST90001724	Inflammatory bowel disease	MR Egger	21	-0.0901731	0.130797	0.498897	0.913773	0.707134	1.1808	24.4403	0.179802	NA	NA
CD19 on IgD+ CD24+ B cell || id:ebi-a-GCST90001724	Inflammatory bowel disease	Weighted median	21	-0.0260092	0.0511837	0.611346	0.974326	0.881325	1.07714	NA	NA	NA	NA
CD19 on IgD+ CD24- B cell || id:ebi-a-GCST90001725	Inflammatory bowel disease	Inverse variance weighted	16	0.0159126	0.0363109	0.661218	1.01604	0.946242	1.09099	13.5732	0.55811	-0.0296037	0.199759
CD19 on IgD+ CD24- B cell || id:ebi-a-GCST90001725	Inflammatory bowel disease	MR Egger	16	0.179889	0.127139	0.178953	1.19708	0.933044	1.53585	11.7621	0.625404	NA	NA
CD19 on IgD+ CD24- B cell || id:ebi-a-GCST90001725	Inflammatory bowel disease	Weighted median	16	0.0398793	0.0506213	0.430816	1.04069	0.942388	1.14924	NA	NA	NA	NA
CD19 on IgD+ CD38- B cell || id:ebi-a-GCST90001726	Inflammatory bowel disease	Inverse variance weighted	20	-0.010739	0.041772	0.797112	0.989318	0.911547	1.07373	25.6982	0.13882	-0.027584	0.207371
CD19 on IgD+ CD38- B cell || id:ebi-a-GCST90001726	Inflammatory bowel disease	MR Egger	20	0.144548	0.125615	0.264905	1.15552	0.903339	1.4781	23.468	0.17324	NA	NA
CD19 on IgD+ CD38- B cell || id:ebi-a-GCST90001726	Inflammatory bowel disease	Weighted median	20	0.00174783	0.0517263	0.973045	1.00175	0.905167	1.10864	NA	NA	NA	NA
CD19 on IgD+ CD38- naive B cell || id:ebi-a-GCST90001727	Inflammatory bowel disease	Inverse variance weighted	13	0.00868765	0.0423971	0.837641	1.00873	0.92829	1.09613	20.0176	0.0667545	0.00553266	0.873617
CD19 on IgD+ CD38- naive B cell || id:ebi-a-GCST90001727	Inflammatory bowel disease	MR Egger	13	-0.0206983	0.185828	0.913318	0.979514	0.680504	1.40991	19.9694	0.0457615	NA	NA
CD19 on IgD+ CD38- naive B cell || id:ebi-a-GCST90001727	Inflammatory bowel disease	Weighted median	13	0.00239962	0.0508157	0.962336	1.0024	0.907375	1.10738	NA	NA	NA	NA
CD19 on IgD+ CD38- unswitched memory B cell || id:ebi-a-GCST90001728	Inflammatory bowel disease	Inverse variance weighted	9	0.00537032	0.0425119	0.899475	1.00538	0.925008	1.09275	4.66522	0.792684	-0.0318723	0.306838
CD19 on IgD+ CD38- unswitched memory B cell || id:ebi-a-GCST90001728	Inflammatory bowel disease	MR Egger	9	0.145604	0.134149	0.313709	1.15674	0.889293	1.50461	3.45047	0.840444	NA	NA
CD19 on IgD+ CD38- unswitched memory B cell || id:ebi-a-GCST90001728	Inflammatory bowel disease	Weighted median	9	-0.0113936	0.0549966	0.835878	0.988671	0.887642	1.1012	NA	NA	NA	NA
CD19 on IgD+ CD38+ B cell || id:ebi-a-GCST90001729	Inflammatory bowel disease	Inverse variance weighted	11	-0.0136705	0.0479316	0.775485	0.986423	0.897972	1.08359	11.7088	0.305016	-0.0360202	0.283539
CD19 on IgD+ CD38+ B cell || id:ebi-a-GCST90001729	Inflammatory bowel disease	MR Egger	11	0.188367	0.183344	0.331052	1.20728	0.842833	1.72931	10.2304	0.332157	NA	NA
CD19 on IgD+ CD38+ B cell || id:ebi-a-GCST90001729	Inflammatory bowel disease	Weighted median	11	-0.00929483	0.0609458	0.878785	0.990748	0.879195	1.11646	NA	NA	NA	NA
CD19 on IgD+ CD38dim B cell || id:ebi-a-GCST90001730	Inflammatory bowel disease	Inverse variance weighted	12	0.0438895	0.0396944	0.268862	1.04487	0.966657	1.1294	7.48251	0.758772	0.00584285	0.832984
CD19 on IgD+ CD38dim B cell || id:ebi-a-GCST90001730	Inflammatory bowel disease	MR Egger	12	0.0101698	0.160759	0.950805	1.01022	0.737184	1.38439	7.43566	0.683775	NA	NA
CD19 on IgD+ CD38dim B cell || id:ebi-a-GCST90001730	Inflammatory bowel disease	Weighted median	12	0.0427541	0.052216	0.412905	1.04368	0.942151	1.15615	NA	NA	NA	NA
CD19 on IgD- CD24- B cell || id:ebi-a-GCST90001731	Inflammatory bowel disease	Inverse variance weighted	15	-0.04918	0.0427944	0.250468	0.95201	0.875415	1.03531	19.3615	0.151592	-0.0326488	0.131145
CD19 on IgD- CD24- B cell || id:ebi-a-GCST90001731	Inflammatory bowel disease	MR Egger	15	0.160732	0.136449	0.259925	1.17437	0.898788	1.53445	16.1388	0.241714	NA	NA
CD19 on IgD- CD24- B cell || id:ebi-a-GCST90001731	Inflammatory bowel disease	Weighted median	15	0.000278811	0.0495311	0.995509	1.00028	0.907736	1.10226	NA	NA	NA	NA
CD19 on IgD- CD27- B cell || id:ebi-a-GCST90001732	Inflammatory bowel disease	Inverse variance weighted	17	-0.0407043	0.0386568	0.292356	0.960113	0.890055	1.03568	17.3292	0.36461	-0.0147703	0.489444
CD19 on IgD- CD27- B cell || id:ebi-a-GCST90001732	Inflammatory bowel disease	MR Egger	17	0.0562065	0.142292	0.698397	1.05782	0.800366	1.39808	16.7679	0.332926	NA	NA
CD19 on IgD- CD27- B cell || id:ebi-a-GCST90001732	Inflammatory bowel disease	Weighted median	17	-0.0407225	0.0504692	0.419736	0.960095	0.869669	1.05992	NA	NA	NA	NA
CD19 on IgD- CD38- B cell || id:ebi-a-GCST90001733	Inflammatory bowel disease	Inverse variance weighted	19	-0.0946809	0.0421345	0.0246328	0.909663	0.837558	0.987976	29.1053	0.0471069	0.0189165	0.338221
CD19 on IgD- CD38- B cell || id:ebi-a-GCST90001733	Inflammatory bowel disease	MR Egger	19	-0.208398	0.12286	0.108075	0.811883	0.638136	1.03294	27.5326	0.0507054	NA	NA
CD19 on IgD- CD38- B cell || id:ebi-a-GCST90001733	Inflammatory bowel disease	Weighted median	19	-0.0859658	0.0445579	0.0536931	0.917626	0.840886	1.00137	NA	NA	NA	NA
CD19 on IgD- CD38+ B cell || id:ebi-a-GCST90001734	Inflammatory bowel disease	Inverse variance weighted	10	0.0159385	0.0601731	0.791103	1.01607	0.903029	1.14325	10.9578	0.278614	0.0259517	0.576166
CD19 on IgD- CD38+ B cell || id:ebi-a-GCST90001734	Inflammatory bowel disease	MR Egger	10	-0.151151	0.2935	0.620479	0.859718	0.483642	1.52823	10.5117	0.230931	NA	NA
CD19 on IgD- CD38+ B cell || id:ebi-a-GCST90001734	Inflammatory bowel disease	Weighted median	10	0.0154697	0.080556	0.847714	1.01559	0.867257	1.18929	NA	NA	NA	NA
CD19 on IgD- CD38dim B cell || id:ebi-a-GCST90001735	Inflammatory bowel disease	Inverse variance weighted	17	-0.0170986	0.0456867	0.708213	0.983047	0.898845	1.07514	29.3674	0.021573	0.0015473	0.950338
CD19 on IgD- CD38dim B cell || id:ebi-a-GCST90001735	Inflammatory bowel disease	MR Egger	17	-0.0258668	0.146266	0.861993	0.974465	0.731581	1.29799	29.3596	0.0144522	NA	NA
CD19 on IgD- CD38dim B cell || id:ebi-a-GCST90001735	Inflammatory bowel disease	Weighted median	17	0.0424704	0.0489593	0.385688	1.04339	0.947916	1.14847	NA	NA	NA	NA
CD19 on memory B cell || id:ebi-a-GCST90001736	Inflammatory bowel disease	Inverse variance weighted	15	-0.0382	0.0539662	0.479038	0.96252	0.865911	1.06991	25.608	0.0290189	-0.0117445	0.730507
CD19 on memory B cell || id:ebi-a-GCST90001736	Inflammatory bowel disease	MR Egger	15	0.0317177	0.206323	0.880185	1.03223	0.688888	1.54668	25.3662	0.0206533	NA	NA
CD19 on memory B cell || id:ebi-a-GCST90001736	Inflammatory bowel disease	Weighted median	15	0.0364577	0.0596529	0.541091	1.03713	0.92269	1.16576	NA	NA	NA	NA
CD19 on naive-mature B cell || id:ebi-a-GCST90001737	Inflammatory bowel disease	Inverse variance weighted	19	0.0481287	0.0350951	0.170256	1.04931	0.979554	1.12402	8.67418	0.966819	-0.0179443	0.405522
CD19 on naive-mature B cell || id:ebi-a-GCST90001737	Inflammatory bowel disease	MR Egger	19	0.149089	0.123453	0.243714	1.16078	0.911303	1.47854	7.94659	0.967675	NA	NA
CD19 on naive-mature B cell || id:ebi-a-GCST90001737	Inflammatory bowel disease	Weighted median	19	0.0408946	0.0457014	0.370883	1.04174	0.952486	1.13936	NA	NA	NA	NA
CD19 on unswitched memory B cell || id:ebi-a-GCST90001738	Inflammatory bowel disease	Inverse variance weighted	16	-0.0963285	0.0538986	0.0739025	0.908166	0.81712	1.00936	22.1909	0.102896	0.0152947	0.588505
CD19 on unswitched memory B cell || id:ebi-a-GCST90001738	Inflammatory bowel disease	MR Egger	16	-0.192894	0.182918	0.309496	0.82457	0.576135	1.18013	21.7153	0.0846564	NA	NA
CD19 on unswitched memory B cell || id:ebi-a-GCST90001738	Inflammatory bowel disease	Weighted median	16	-0.045972	0.0675104	0.495896	0.955069	0.836698	1.09019	NA	NA	NA	NA
CD19 on Plasma Blast-Plasma Cell || id:ebi-a-GCST90001739	Inflammatory bowel disease	Inverse variance weighted	18	0.064008	0.0413418	0.121559	1.0661	0.983122	1.15608	19.4452	0.303585	0.00177484	0.940549
CD19 on Plasma Blast-Plasma Cell || id:ebi-a-GCST90001739	Inflammatory bowel disease	MR Egger	18	0.0539149	0.13987	0.704969	1.05539	0.802334	1.38827	19.4382	0.246595	NA	NA
CD19 on Plasma Blast-Plasma Cell || id:ebi-a-GCST90001739	Inflammatory bowel disease	Weighted median	18	0.0653518	0.0533864	0.220904	1.06753	0.961476	1.18529	NA	NA	NA	NA
CD19 on switched memory B cell || id:ebi-a-GCST90001740	Inflammatory bowel disease	Inverse variance weighted	16	-0.0710574	0.0534481	0.183695	0.931408	0.838773	1.03428	32.8806	0.00487565	-0.00539989	0.850374
CD19 on switched memory B cell || id:ebi-a-GCST90001740	Inflammatory bowel disease	MR Egger	16	-0.0421669	0.160175	0.796188	0.95871	0.700396	1.31229	32.7941	0.00308454	NA	NA
CD19 on switched memory B cell || id:ebi-a-GCST90001740	Inflammatory bowel disease	Weighted median	16	0.00533752	0.0530624	0.919876	1.00535	0.906046	1.11554	NA	NA	NA	NA
CD19 on IgD+ B cell || id:ebi-a-GCST90001741	Inflammatory bowel disease	Inverse variance weighted	17	0.0246598	0.0364269	0.498427	1.02497	0.954338	1.10082	16.7311	0.403203	-0.0247949	0.272049
CD19 on IgD+ B cell || id:ebi-a-GCST90001741	Inflammatory bowel disease	MR Egger	17	0.159702	0.123806	0.216604	1.17316	0.920391	1.49535	15.3965	0.423255	NA	NA
CD19 on IgD+ B cell || id:ebi-a-GCST90001741	Inflammatory bowel disease	Weighted median	17	0.0386973	0.0505392	0.443862	1.03946	0.941426	1.14769	NA	NA	NA	NA
CD19 on transitional B cell || id:ebi-a-GCST90001742	Inflammatory bowel disease	Inverse variance weighted	16	-0.0553174	0.0376509	0.141773	0.946185	0.878874	1.01865	13.7918	0.541375	0.0341995	0.162167
CD19 on transitional B cell || id:ebi-a-GCST90001742	Inflammatory bowel disease	MR Egger	16	-0.26339	0.145942	0.0926616	0.768442	0.577275	1.02292	11.6142	0.637254	NA	NA
CD19 on transitional B cell || id:ebi-a-GCST90001742	Inflammatory bowel disease	Weighted median	16	-0.0874214	0.054087	0.106027	0.916291	0.824126	1.01876	NA	NA	NA	NA
CD20 on B cell || id:ebi-a-GCST90001743	Inflammatory bowel disease	Inverse variance weighted	15	-0.0791021	0.0506847	0.118602	0.923946	0.836571	1.02045	36.051	0.00102526	-0.00651301	0.852114
CD20 on B cell || id:ebi-a-GCST90001743	Inflammatory bowel disease	MR Egger	15	-0.0432885	0.195513	0.828213	0.957635	0.652794	1.40483	35.951	0.000603828	NA	NA
CD20 on B cell || id:ebi-a-GCST90001743	Inflammatory bowel disease	Weighted median	15	-0.0275317	0.0486233	0.571241	0.972844	0.884411	1.07012	NA	NA	NA	NA
CD20 on CD20- CD38- B cell || id:ebi-a-GCST90001744	Inflammatory bowel disease	Inverse variance weighted	12	-0.00561729	0.0509513	0.912212	0.994398	0.899891	1.09883	13.1112	0.286123	-0.00404118	0.863199
CD20 on CD20- CD38- B cell || id:ebi-a-GCST90001744	Inflammatory bowel disease	MR Egger	12	0.0197512	0.15309	0.899902	1.01995	0.755553	1.37686	13.0703	0.219768	NA	NA
CD20 on CD20- CD38- B cell || id:ebi-a-GCST90001744	Inflammatory bowel disease	Weighted median	12	-0.0531243	0.0657946	0.419421	0.948262	0.833533	1.07878	NA	NA	NA	NA
CD20 on CD24+ CD27+ B cell || id:ebi-a-GCST90001745	Inflammatory bowel disease	Inverse variance weighted	21	0.00763111	0.0403355	0.849943	1.00766	0.931065	1.09056	32.004	0.0432553	0.00980424	0.64847
CD20 on CD24+ CD27+ B cell || id:ebi-a-GCST90001745	Inflammatory bowel disease	MR Egger	21	-0.0426183	0.116022	0.717434	0.958277	0.763363	1.20296	31.6466	0.0342394	NA	NA
CD20 on CD24+ CD27+ B cell || id:ebi-a-GCST90001745	Inflammatory bowel disease	Weighted median	21	-0.0197701	0.0477253	0.678692	0.980424	0.892872	1.07656	NA	NA	NA	NA
CD20 on IgD+ CD24+ B cell || id:ebi-a-GCST90001746	Inflammatory bowel disease	Inverse variance weighted	15	-0.023083	0.056942	0.6852	0.977181	0.873987	1.09256	27.8352	0.0149617	0.0264279	0.418309
CD20 on IgD+ CD24+ B cell || id:ebi-a-GCST90001746	Inflammatory bowel disease	MR Egger	15	-0.176451	0.192294	0.375534	0.83824	0.575022	1.22195	26.4154	0.014944	NA	NA
CD20 on IgD+ CD24+ B cell || id:ebi-a-GCST90001746	Inflammatory bowel disease	Weighted median	15	-0.0250115	0.0596355	0.674919	0.975299	0.867711	1.09623	NA	NA	NA	NA
CD20 on IgD+ CD24- B cell || id:ebi-a-GCST90001747	Inflammatory bowel disease	Inverse variance weighted	18	-0.0551066	0.0421973	0.191577	0.946384	0.871261	1.02798	37.7741	0.00263957	-0.017843	0.475666
CD20 on IgD+ CD24- B cell || id:ebi-a-GCST90001747	Inflammatory bowel disease	MR Egger	18	0.043215	0.141238	0.763572	1.04416	0.791669	1.37719	36.5551	0.00242133	NA	NA
CD20 on IgD+ CD24- B cell || id:ebi-a-GCST90001747	Inflammatory bowel disease	Weighted median	18	-0.0159863	0.0428051	0.708801	0.984141	0.904942	1.07027	NA	NA	NA	NA
CD20 on IgD+ CD38- B cell || id:ebi-a-GCST90001748	Inflammatory bowel disease	Inverse variance weighted	18	-0.0171346	0.038126	0.653128	0.983011	0.912231	1.05928	23.0973	0.146109	-0.044291	0.0735429
CD20 on IgD+ CD38- B cell || id:ebi-a-GCST90001748	Inflammatory bowel disease	MR Egger	18	0.228862	0.133258	0.105189	1.25717	0.968193	1.63239	18.7905	0.279679	NA	NA
CD20 on IgD+ CD38- B cell || id:ebi-a-GCST90001748	Inflammatory bowel disease	Weighted median	18	-0.0394249	0.0470272	0.401838	0.961342	0.876693	1.05416	NA	NA	NA	NA
CD20 on IgD+ CD38- naive B cell || id:ebi-a-GCST90001749	Inflammatory bowel disease	Inverse variance weighted	15	0.0537204	0.066675	0.420413	1.05519	0.925924	1.2025	77.9925	6.66e-11	-0.0440878	0.453662
CD20 on IgD+ CD38- naive B cell || id:ebi-a-GCST90001749	Inflammatory bowel disease	MR Egger	15	0.24068	0.251313	0.355691	1.27211	0.777328	2.08184	74.5699	1.14e-10	NA	NA
CD20 on IgD+ CD38- naive B cell || id:ebi-a-GCST90001749	Inflammatory bowel disease	Weighted median	15	0.0539395	0.04578	0.238704	1.05542	0.964844	1.1545	NA	NA	NA	NA
CD20 on IgD+ CD38- unswitched memory B cell || id:ebi-a-GCST90001750	Inflammatory bowel disease	Inverse variance weighted	15	-0.0559625	0.0318891	0.0792744	0.945575	0.888283	1.00656	17.9618	0.208526	-0.0218602	0.493772
CD20 on IgD+ CD38- unswitched memory B cell || id:ebi-a-GCST90001750	Inflammatory bowel disease	MR Egger	15	0.0471829	0.150043	0.758161	1.04831	0.781217	1.40673	17.3019	0.185867	NA	NA
CD20 on IgD+ CD38- unswitched memory B cell || id:ebi-a-GCST90001750	Inflammatory bowel disease	Weighted median	15	-0.0230584	0.0383346	0.547505	0.977205	0.906473	1.05346	NA	NA	NA	NA
CD20 on IgD+ CD38+ B cell || id:ebi-a-GCST90001751	Inflammatory bowel disease	Inverse variance weighted	18	-0.0956157	0.0317613	0.00260863	0.908813	0.853963	0.967187	18.5447	0.35528	-0.0126732	0.497432
CD20 on IgD+ CD38+ B cell || id:ebi-a-GCST90001751	Inflammatory bowel disease	MR Egger	18	-0.0275698	0.103174	0.792716	0.972807	0.7947	1.19083	18.0023	0.323761	NA	NA
CD20 on IgD+ CD38+ B cell || id:ebi-a-GCST90001751	Inflammatory bowel disease	Weighted median	18	-0.0582985	0.0467304	0.212196	0.943368	0.860803	1.03385	NA	NA	NA	NA
CD20 on IgD+ CD38dim B cell || id:ebi-a-GCST90001752	Inflammatory bowel disease	Inverse variance weighted	25	-0.0441737	0.0484784	0.362187	0.956788	0.870062	1.05216	86.3287	5.79e-09	0.0128476	0.690866
CD20 on IgD+ CD38dim B cell || id:ebi-a-GCST90001752	Inflammatory bowel disease	MR Egger	25	-0.112287	0.17618	0.530198	0.893788	0.6328	1.26242	85.7242	3.67e-09	NA	NA
CD20 on IgD+ CD38dim B cell || id:ebi-a-GCST90001752	Inflammatory bowel disease	Weighted median	25	-0.0410773	0.0404395	0.309738	0.959755	0.88662	1.03892	NA	NA	NA	NA
CD20 on IgD- CD24- B cell || id:ebi-a-GCST90001753	Inflammatory bowel disease	Inverse variance weighted	20	-0.0551265	0.0357393	0.122962	0.946365	0.882342	1.01503	22.5233	0.258992	-0.0104932	0.613159
CD20 on IgD- CD24- B cell || id:ebi-a-GCST90001753	Inflammatory bowel disease	MR Egger	20	0.00728847	0.126669	0.954749	1.00732	0.785855	1.29118	22.1968	0.223363	NA	NA
CD20 on IgD- CD24- B cell || id:ebi-a-GCST90001753	Inflammatory bowel disease	Weighted median	20	-0.0201639	0.0445608	0.650906	0.980038	0.898074	1.06948	NA	NA	NA	NA
CD20 on IgD- CD27- B cell || id:ebi-a-GCST90001754	Inflammatory bowel disease	Inverse variance weighted	15	0.0523039	0.0469371	0.265133	1.0537	0.961085	1.15523	23.5846	0.0513983	-0.0327456	0.36057
CD20 on IgD- CD27- B cell || id:ebi-a-GCST90001754	Inflammatory bowel disease	MR Egger	15	0.244159	0.207853	0.261195	1.27655	0.849394	1.91851	22.0605	0.0544319	NA	NA
CD20 on IgD- CD27- B cell || id:ebi-a-GCST90001754	Inflammatory bowel disease	Weighted median	15	0.015054	0.0538299	0.779739	1.01517	0.913518	1.12813	NA	NA	NA	NA
CD20 on IgD- CD38- B cell || id:ebi-a-GCST90001755	Inflammatory bowel disease	Inverse variance weighted	22	0.0268774	0.0640934	0.674962	1.02724	0.905973	1.16474	86.5146	6.4e-10	0.000781909	0.981903
CD20 on IgD- CD38- B cell || id:ebi-a-GCST90001755	Inflammatory bowel disease	MR Egger	22	0.0223559	0.207529	0.915288	1.02261	0.680858	1.53589	86.5123	3e-10	NA	NA
CD20 on IgD- CD38- B cell || id:ebi-a-GCST90001755	Inflammatory bowel disease	Weighted median	22	-0.0264875	0.0454534	0.560068	0.97386	0.890853	1.0646	NA	NA	NA	NA
CD20 on IgD- CD38+ B cell || id:ebi-a-GCST90001756	Inflammatory bowel disease	Inverse variance weighted	9	-0.0522329	0.0491302	0.287712	0.949108	0.861976	1.04505	4.16322	0.842105	-0.0171208	0.487096
CD20 on IgD- CD38+ B cell || id:ebi-a-GCST90001756	Inflammatory bowel disease	MR Egger	9	0.0489489	0.146435	0.747967	1.05017	0.788153	1.39928	3.62522	0.82179	NA	NA
CD20 on IgD- CD38+ B cell || id:ebi-a-GCST90001756	Inflammatory bowel disease	Weighted median	9	-0.0126062	0.0651373	0.846541	0.987473	0.869119	1.12194	NA	NA	NA	NA
CD20 on IgD- CD38dim B cell || id:ebi-a-GCST90001757	Inflammatory bowel disease	Inverse variance weighted	25	0.0687102	0.0637183	0.280881	1.07113	0.945371	1.21361	121.518	5.2e-15	0.0191601	0.562064
CD20 on IgD- CD38dim B cell || id:ebi-a-GCST90001757	Inflammatory bowel disease	MR Egger	25	-0.0355201	0.188584	0.852252	0.965103	0.666881	1.39669	119.716	4.68e-15	NA	NA
CD20 on IgD- CD38dim B cell || id:ebi-a-GCST90001757	Inflammatory bowel disease	Weighted median	25	-0.0134785	0.0435082	0.756719	0.986612	0.905965	1.07444	NA	NA	NA	NA
CD20 on memory B cell || id:ebi-a-GCST90001758	Inflammatory bowel disease	Inverse variance weighted	21	0.0263709	0.0630919	0.675965	1.02672	0.907293	1.16187	76.1854	1.73e-08	0.0307106	0.298218
CD20 on memory B cell || id:ebi-a-GCST90001758	Inflammatory bowel disease	MR Egger	21	-0.159598	0.18489	0.398791	0.852486	0.593343	1.22481	71.8589	4.5e-08	NA	NA
CD20 on memory B cell || id:ebi-a-GCST90001758	Inflammatory bowel disease	Weighted median	21	-0.0221271	0.0477564	0.643126	0.978116	0.890716	1.07409	NA	NA	NA	NA
CD20 on naive-mature B cell || id:ebi-a-GCST90001759	Inflammatory bowel disease	Inverse variance weighted	17	-0.0447487	0.041502	0.280931	0.956238	0.881533	1.03727	29.9157	0.018444	0.00024176	0.992212
CD20 on naive-mature B cell || id:ebi-a-GCST90001759	Inflammatory bowel disease	MR Egger	17	-0.0461558	0.14811	0.75961	0.954893	0.7143	1.27652	29.9155	0.0122297	NA	NA
CD20 on naive-mature B cell || id:ebi-a-GCST90001759	Inflammatory bowel disease	Weighted median	17	-0.0244412	0.0478753	0.609688	0.975855	0.88845	1.07186	NA	NA	NA	NA
CD20 on unswitched memory B cell || id:ebi-a-GCST90001760	Inflammatory bowel disease	Inverse variance weighted	14	-0.0878019	0.075484	0.244754	0.915942	0.789978	1.06199	50.7005	2.26e-06	0.0516403	0.186505
CD20 on unswitched memory B cell || id:ebi-a-GCST90001760	Inflammatory bowel disease	MR Egger	14	-0.380928	0.221524	0.111171	0.683227	0.442589	1.0547	43.5722	1.81e-05	NA	NA
CD20 on unswitched memory B cell || id:ebi-a-GCST90001760	Inflammatory bowel disease	Weighted median	14	-0.020931	0.0521623	0.688224	0.979287	0.884114	1.0847	NA	NA	NA	NA
CD20 on switched memory B cell || id:ebi-a-GCST90001761	Inflammatory bowel disease	Inverse variance weighted	24	0.0422103	0.0501077	0.399569	1.04311	0.945538	1.15076	79.4199	3.94e-08	0.016802	0.565436
CD20 on switched memory B cell || id:ebi-a-GCST90001761	Inflammatory bowel disease	MR Egger	24	-0.0375325	0.145795	0.799237	0.963163	0.723763	1.28175	78.2092	3.19e-08	NA	NA
CD20 on switched memory B cell || id:ebi-a-GCST90001761	Inflammatory bowel disease	Weighted median	24	-0.00640651	0.0403218	0.87376	0.993614	0.918111	1.07533	NA	NA	NA	NA
CD20 on IgD+ B cell || id:ebi-a-GCST90001762	Inflammatory bowel disease	Inverse variance weighted	15	-0.0277431	0.0371725	0.455465	0.972638	0.904294	1.04615	20.8264	0.106164	0.0153362	0.572914
CD20 on IgD+ B cell || id:ebi-a-GCST90001762	Inflammatory bowel disease	MR Egger	15	-0.109998	0.147237	0.468311	0.895836	0.671271	1.19553	20.304	0.0878844	NA	NA
CD20 on IgD+ B cell || id:ebi-a-GCST90001762	Inflammatory bowel disease	Weighted median	15	-0.0177237	0.0456918	0.698093	0.982432	0.898274	1.07448	NA	NA	NA	NA
CD20 on transitional B cell || id:ebi-a-GCST90001763	Inflammatory bowel disease	Inverse variance weighted	19	-0.027562	0.0310858	0.375271	0.972814	0.915312	1.03393	13.5245	0.759522	-0.0116081	0.535989
CD20 on transitional B cell || id:ebi-a-GCST90001763	Inflammatory bowel disease	MR Egger	19	0.034448	0.102969	0.742058	1.03505	0.845886	1.26651	13.1254	0.727748	NA	NA
CD20 on transitional B cell || id:ebi-a-GCST90001763	Inflammatory bowel disease	Weighted median	19	-0.0450529	0.0448009	0.314597	0.955947	0.875585	1.04368	NA	NA	NA	NA
CD24 on CD24+ CD27+ B cell || id:ebi-a-GCST90001764	Inflammatory bowel disease	Inverse variance weighted	2	0.134944	0.228113	0.554142	1.14447	0.731866	1.7897	4.92491	0.0264721	NA	NA
CD24 on IgD+ CD24+ B cell || id:ebi-a-GCST90001765	Inflammatory bowel disease	Inverse variance weighted	16	0.00596447	0.0403094	0.882369	1.00598	0.929562	1.08869	31.1716	0.00833186	-0.00129949	0.932453
CD24 on IgD+ CD24+ B cell || id:ebi-a-GCST90001765	Inflammatory bowel disease	MR Egger	16	0.0116297	0.0777799	0.883276	1.0117	0.868647	1.17831	31.155	0.00527303	NA	NA
CD24 on IgD+ CD24+ B cell || id:ebi-a-GCST90001765	Inflammatory bowel disease	Weighted median	16	-0.0144412	0.0393534	0.713648	0.985663	0.912494	1.0647	NA	NA	NA	NA
CD24 on IgD+ CD38- B cell || id:ebi-a-GCST90001766	Inflammatory bowel disease	Inverse variance weighted	17	-0.0177298	0.0322242	0.582181	0.982426	0.922296	1.04648	10.4011	0.844857	0.0147327	0.360268
CD24 on IgD+ CD38- B cell || id:ebi-a-GCST90001766	Inflammatory bowel disease	MR Egger	17	-0.0905786	0.0836495	0.295982	0.913403	0.77528	1.07613	9.51055	0.849347	NA	NA
CD24 on IgD+ CD38- B cell || id:ebi-a-GCST90001766	Inflammatory bowel disease	Weighted median	17	-0.0262844	0.044564	0.555317	0.974058	0.892588	1.06296	NA	NA	NA	NA
CD24 on IgD+ CD38- unswitched memory B cell || id:ebi-a-GCST90001767	Inflammatory bowel disease	Inverse variance weighted	17	0.032037	0.0278138	0.249387	1.03256	0.977773	1.09041	23.6516	0.0973952	0.0129555	0.534853
CD24 on IgD+ CD38- unswitched memory B cell || id:ebi-a-GCST90001767	Inflammatory bowel disease	MR Egger	17	-0.00459106	0.0642529	0.943981	0.995419	0.877633	1.12901	23.032	0.0834625	NA	NA
CD24 on IgD+ CD38- unswitched memory B cell || id:ebi-a-GCST90001767	Inflammatory bowel disease	Weighted median	17	-0.0121776	0.0321603	0.704947	0.987896	0.927547	1.05217	NA	NA	NA	NA
CD24 on IgD+ CD38+ B cell || id:ebi-a-GCST90001768	Inflammatory bowel disease	Inverse variance weighted	17	-0.0451641	0.0352163	0.199675	0.955841	0.89209	1.02415	15.3335	0.50036	0.00801296	0.686346
CD24 on IgD+ CD38+ B cell || id:ebi-a-GCST90001768	Inflammatory bowel disease	MR Egger	17	-0.0877399	0.109296	0.434641	0.915999	0.739368	1.13483	15.1622	0.439802	NA	NA
CD24 on IgD+ CD38+ B cell || id:ebi-a-GCST90001768	Inflammatory bowel disease	Weighted median	17	-0.0365473	0.0509733	0.47338	0.964112	0.872446	1.06541	NA	NA	NA	NA
CD24 on IgD- CD38- B cell || id:ebi-a-GCST90001769	Inflammatory bowel disease	Inverse variance weighted	18	-0.00497063	0.0321463	0.877117	0.995042	0.934282	1.05975	17.6798	0.409307	-0.00467792	0.75477
CD24 on IgD- CD38- B cell || id:ebi-a-GCST90001769	Inflammatory bowel disease	MR Egger	18	0.0177249	0.0786901	0.824637	1.01788	0.8724	1.18763	17.5689	0.349738	NA	NA
CD24 on IgD- CD38- B cell || id:ebi-a-GCST90001769	Inflammatory bowel disease	Weighted median	18	-0.0278157	0.0421146	0.508948	0.972568	0.895511	1.05625	NA	NA	NA	NA
CD24 on IgD- CD38dim B cell || id:ebi-a-GCST90001770	Inflammatory bowel disease	Inverse variance weighted	4	-0.00527371	0.0745737	0.943622	0.99474	0.859471	1.1513	2.95378	0.398806	-0.0181006	0.774249
CD24 on IgD- CD38dim B cell || id:ebi-a-GCST90001770	Inflammatory bowel disease	MR Egger	4	0.120221	0.392976	0.78857	1.12775	0.522039	2.43624	2.80325	0.246197	NA	NA
CD24 on IgD- CD38dim B cell || id:ebi-a-GCST90001770	Inflammatory bowel disease	Weighted median	4	0.014596	0.0970069	0.880399	1.0147	0.839006	1.22719	NA	NA	NA	NA
CD24 on memory B cell || id:ebi-a-GCST90001771	Inflammatory bowel disease	Inverse variance weighted	20	0.0508911	0.0399527	0.20274	1.05221	0.972956	1.13792	41.877	0.00184138	0.00434771	0.789506
CD24 on memory B cell || id:ebi-a-GCST90001771	Inflammatory bowel disease	MR Egger	20	0.0310489	0.0839085	0.715676	1.03154	0.875105	1.21593	41.7069	0.00121499	NA	NA
CD24 on memory B cell || id:ebi-a-GCST90001771	Inflammatory bowel disease	Weighted median	20	0.0184905	0.0410656	0.652518	1.01866	0.939885	1.10404	NA	NA	NA	NA
CD24 on unswitched memory B cell || id:ebi-a-GCST90001772	Inflammatory bowel disease	Inverse variance weighted	17	0.00194671	0.0351895	0.955883	1.00195	0.935172	1.07349	22.6277	0.124056	-0.0036775	0.809745
CD24 on unswitched memory B cell || id:ebi-a-GCST90001772	Inflammatory bowel disease	MR Egger	17	0.0174138	0.0727995	0.814186	1.01757	0.882256	1.17363	22.5375	0.0944664	NA	NA
CD24 on unswitched memory B cell || id:ebi-a-GCST90001772	Inflammatory bowel disease	Weighted median	17	0.00470374	0.0420503	0.910935	1.00471	0.925228	1.09103	NA	NA	NA	NA
CD24 on switched memory B cell || id:ebi-a-GCST90001773	Inflammatory bowel disease	Inverse variance weighted	22	0.029251	0.029982	0.329254	1.02968	0.970917	1.09201	26.6307	0.183413	-0.00102227	0.930678
CD24 on switched memory B cell || id:ebi-a-GCST90001773	Inflammatory bowel disease	MR Egger	22	0.0342382	0.0644086	0.600873	1.03483	0.912103	1.17407	26.6204	0.146286	NA	NA
CD24 on switched memory B cell || id:ebi-a-GCST90001773	Inflammatory bowel disease	Weighted median	22	0.0179683	0.0401659	0.654621	1.01813	0.941052	1.10152	NA	NA	NA	NA
CD24 on transitional B cell || id:ebi-a-GCST90001774	Inflammatory bowel disease	Inverse variance weighted	14	0.0392204	0.0625787	0.530831	1.04	0.919952	1.17571	33.1954	0.00159261	0.0393584	0.312457
CD24 on transitional B cell || id:ebi-a-GCST90001774	Inflammatory bowel disease	MR Egger	14	-0.143111	0.183805	0.451293	0.866657	0.60449	1.24253	30.3806	0.00244652	NA	NA
CD24 on transitional B cell || id:ebi-a-GCST90001774	Inflammatory bowel disease	Weighted median	14	-0.00717813	0.0562024	0.898371	0.992848	0.889287	1.10847	NA	NA	NA	NA
CD25 on B cell || id:ebi-a-GCST90001775	Inflammatory bowel disease	Inverse variance weighted	14	0.0348685	0.0454953	0.443427	1.03548	0.947146	1.13206	21.0394	0.0721538	-0.0127978	0.521287
CD25 on B cell || id:ebi-a-GCST90001775	Inflammatory bowel disease	MR Egger	14	0.099649	0.108522	0.376582	1.10478	0.893102	1.36664	20.3009	0.0616042	NA	NA
CD25 on B cell || id:ebi-a-GCST90001775	Inflammatory bowel disease	Weighted median	14	0.0392302	0.0530561	0.459658	1.04001	0.937293	1.15398	NA	NA	NA	NA
CD25 on CD20- CD38- B cell || id:ebi-a-GCST90001776	Inflammatory bowel disease	Inverse variance weighted	13	0.050609	0.0534203	0.343448	1.05191	0.947342	1.16802	21.0462	0.049708	0.000657041	0.978714
CD25 on CD20- CD38- B cell || id:ebi-a-GCST90001776	Inflammatory bowel disease	MR Egger	13	0.0469489	0.145243	0.752572	1.04807	0.788418	1.39323	21.0448	0.0329101	NA	NA
CD25 on CD20- CD38- B cell || id:ebi-a-GCST90001776	Inflammatory bowel disease	Weighted median	13	0.0893384	0.062848	0.155172	1.09345	0.966723	1.23679	NA	NA	NA	NA
CD25 on CD24+ CD27+ B cell || id:ebi-a-GCST90001777	Inflammatory bowel disease	Inverse variance weighted	21	-0.0300382	0.0343813	0.382294	0.970408	0.90717	1.03806	35.4489	0.0178396	-0.0159061	0.371182
CD25 on CD24+ CD27+ B cell || id:ebi-a-GCST90001777	Inflammatory bowel disease	MR Egger	21	0.0453568	0.0892605	0.617204	1.0464	0.878452	1.24646	33.9499	0.0186293	NA	NA
CD25 on CD24+ CD27+ B cell || id:ebi-a-GCST90001777	Inflammatory bowel disease	Weighted median	21	0.0372245	0.0369591	0.313848	1.03793	0.965397	1.1159	NA	NA	NA	NA
CD25 on IgD+ CD24+ B cell || id:ebi-a-GCST90001778	Inflammatory bowel disease	Inverse variance weighted	17	-0.0269233	0.0401835	0.502853	0.973436	0.89971	1.0532	29.7714	0.0192241	-0.00477412	0.827211
CD25 on IgD+ CD24+ B cell || id:ebi-a-GCST90001778	Inflammatory bowel disease	MR Egger	17	-0.0038999	0.111624	0.97259	0.996108	0.800368	1.23972	29.6738	0.0131535	NA	NA
CD25 on IgD+ CD24+ B cell || id:ebi-a-GCST90001778	Inflammatory bowel disease	Weighted median	17	0.0178067	0.0421358	0.672584	1.01797	0.937274	1.10561	NA	NA	NA	NA
CD25 on IgD+ CD24- B cell || id:ebi-a-GCST90001779	Inflammatory bowel disease	Inverse variance weighted	14	0.0876028	0.0340044	0.0099888	1.09155	1.02118	1.16678	14.0929	0.367335	0.00163521	0.923279
CD25 on IgD+ CD24- B cell || id:ebi-a-GCST90001779	Inflammatory bowel disease	MR Egger	14	0.0810245	0.0756673	0.305324	1.0844	0.93493	1.25776	14.0815	0.295532	NA	NA
CD25 on IgD+ CD24- B cell || id:ebi-a-GCST90001779	Inflammatory bowel disease	Weighted median	14	0.0903321	0.0458285	0.0487136	1.09454	1.00051	1.1974	NA	NA	NA	NA
CD25 on IgD+ CD38- B cell || id:ebi-a-GCST90001780	Inflammatory bowel disease	Inverse variance weighted	15	0.0285724	0.0416845	0.493063	1.02898	0.948258	1.11658	19.8022	0.136502	-0.0120573	0.588142
CD25 on IgD+ CD38- B cell || id:ebi-a-GCST90001780	Inflammatory bowel disease	MR Egger	15	0.088379	0.115884	0.459286	1.0924	0.870443	1.37096	19.3434	0.112834	NA	NA
CD25 on IgD+ CD38- B cell || id:ebi-a-GCST90001780	Inflammatory bowel disease	Weighted median	15	0.0910557	0.0516488	0.077904	1.09533	0.989876	1.21202	NA	NA	NA	NA
CD25 on IgD+ CD38- naive B cell || id:ebi-a-GCST90001781	Inflammatory bowel disease	Inverse variance weighted	19	-0.00422782	0.0299537	0.887755	0.995781	0.939003	1.05599	23.8127	0.16126	-0.0256413	0.219911
CD25 on IgD+ CD38- naive B cell || id:ebi-a-GCST90001781	Inflammatory bowel disease	MR Egger	19	0.102275	0.0886516	0.264595	1.10769	0.931013	1.31789	21.7382	0.194996	NA	NA
CD25 on IgD+ CD38- naive B cell || id:ebi-a-GCST90001781	Inflammatory bowel disease	Weighted median	19	-0.0522848	0.0392399	0.182716	0.949059	0.878803	1.02493	NA	NA	NA	NA
CD25 on IgD+ CD38- unswitched memory B cell || id:ebi-a-GCST90001782	Inflammatory bowel disease	Inverse variance weighted	15	-0.0355708	0.0398669	0.372265	0.965054	0.892517	1.04349	35.4415	0.00126423	-0.00514184	0.874794
CD25 on IgD+ CD38- unswitched memory B cell || id:ebi-a-GCST90001782	Inflammatory bowel disease	MR Egger	15	-0.0168688	0.123494	0.893443	0.983273	0.771886	1.25255	35.3712	0.00074232	NA	NA
CD25 on IgD+ CD38- unswitched memory B cell || id:ebi-a-GCST90001782	Inflammatory bowel disease	Weighted median	15	2.65e-05	0.0360733	0.999414	1.00003	0.931763	1.07329	NA	NA	NA	NA
CD25 on IgD+ CD38+ B cell || id:ebi-a-GCST90001783	Inflammatory bowel disease	Inverse variance weighted	12	0.125452	0.0400493	0.00173364	1.13366	1.04808	1.22624	6.9956	0.79944	-0.00945075	0.667602
CD25 on IgD+ CD38+ B cell || id:ebi-a-GCST90001783	Inflammatory bowel disease	MR Egger	12	0.179296	0.128125	0.191944	1.19638	0.93069	1.53791	6.79987	0.744194	NA	NA
CD25 on IgD+ CD38+ B cell || id:ebi-a-GCST90001783	Inflammatory bowel disease	Weighted median	12	0.1143	0.054509	0.0360032	1.12109	1.00749	1.24749	NA	NA	NA	NA
CD25 on IgD+ CD38dim B cell || id:ebi-a-GCST90001784	Inflammatory bowel disease	Inverse variance weighted	13	0.0791789	0.039087	0.0427948	1.0824	1.00257	1.16858	13.8102	0.312992	-0.00912348	0.579458
CD25 on IgD+ CD38dim B cell || id:ebi-a-GCST90001784	Inflammatory bowel disease	MR Egger	13	0.120655	0.0830324	0.174119	1.12824	0.958785	1.32763	13.4126	0.267214	NA	NA
CD25 on IgD+ CD38dim B cell || id:ebi-a-GCST90001784	Inflammatory bowel disease	Weighted median	13	0.0815421	0.0508721	0.10896	1.08496	0.981997	1.19872	NA	NA	NA	NA
CD25 on IgD- CD24- B cell || id:ebi-a-GCST90001785	Inflammatory bowel disease	Inverse variance weighted	22	0.040444	0.0512364	0.429902	1.04127	0.941784	1.15127	51.8413	0.000201127	-0.0172349	0.494717
CD25 on IgD- CD24- B cell || id:ebi-a-GCST90001785	Inflammatory bowel disease	MR Egger	22	0.147535	0.162472	0.374657	1.15897	0.842898	1.59357	50.617	0.000180616	NA	NA
CD25 on IgD- CD24- B cell || id:ebi-a-GCST90001785	Inflammatory bowel disease	Weighted median	22	0.0209226	0.0467259	0.654318	1.02114	0.931778	1.11908	NA	NA	NA	NA
CD25 on IgD- CD27- B cell || id:ebi-a-GCST90001786	Inflammatory bowel disease	Inverse variance weighted	15	0.0407192	0.0793205	0.607706	1.04156	0.89159	1.21675	66.5273	8.16e-09	0.0273845	0.514365
CD25 on IgD- CD27- B cell || id:ebi-a-GCST90001786	Inflammatory bowel disease	MR Egger	15	-0.124322	0.25916	0.639403	0.883095	0.531381	1.4676	64.3045	8.82e-09	NA	NA
CD25 on IgD- CD27- B cell || id:ebi-a-GCST90001786	Inflammatory bowel disease	Weighted median	15	0.098537	0.0593959	0.0971188	1.10356	0.98228	1.2398	NA	NA	NA	NA
CD25 on IgD- CD38- B cell || id:ebi-a-GCST90001787	Inflammatory bowel disease	Inverse variance weighted	12	-0.032443	0.0347765	0.350871	0.968078	0.90429	1.03636	10.9258	0.449501	0.00765205	0.643529
CD25 on IgD- CD38- B cell || id:ebi-a-GCST90001787	Inflammatory bowel disease	MR Egger	12	-0.0726142	0.0915457	0.446072	0.92996	0.777211	1.11273	10.6826	0.382775	NA	NA
CD25 on IgD- CD38- B cell || id:ebi-a-GCST90001787	Inflammatory bowel disease	Weighted median	12	-0.0510576	0.0481155	0.288623	0.950224	0.864707	1.0442	NA	NA	NA	NA
CD25 on IgD- CD38+ B cell || id:ebi-a-GCST90001788	Inflammatory bowel disease	Inverse variance weighted	16	0.099536	0.0509272	0.0506451	1.10466	0.999719	1.22061	22.2351	0.101786	0.0111011	0.758396
CD25 on IgD- CD38+ B cell || id:ebi-a-GCST90001788	Inflammatory bowel disease	MR Egger	16	0.0205802	0.257138	0.937342	1.02079	0.616676	1.68973	22.0799	0.0769868	NA	NA
CD25 on IgD- CD38+ B cell || id:ebi-a-GCST90001788	Inflammatory bowel disease	Weighted median	16	0.071061	0.0618059	0.250249	1.07365	0.951155	1.21191	NA	NA	NA	NA
CD25 on IgD- CD38dim B cell || id:ebi-a-GCST90001789	Inflammatory bowel disease	Inverse variance weighted	16	0.0172494	0.0377275	0.64752	1.0174	0.944881	1.09548	20.6239	0.149284	0.0141599	0.418178
CD25 on IgD- CD38dim B cell || id:ebi-a-GCST90001789	Inflammatory bowel disease	MR Egger	16	-0.054058	0.0935935	0.572719	0.947377	0.788596	1.13813	19.6473	0.14166	NA	NA
CD25 on IgD- CD38dim B cell || id:ebi-a-GCST90001789	Inflammatory bowel disease	Weighted median	16	0.0526684	0.046169	0.253964	1.05408	0.962884	1.15391	NA	NA	NA	NA
CD25 on memory B cell || id:ebi-a-GCST90001790	Inflammatory bowel disease	Inverse variance weighted	18	-0.0118508	0.0382532	0.756713	0.988219	0.916836	1.06516	31.519	0.0172562	-0.00646353	0.718586
CD25 on memory B cell || id:ebi-a-GCST90001790	Inflammatory bowel disease	MR Egger	18	0.0190414	0.0929279	0.84023	1.01922	0.849509	1.22284	31.2562	0.0124776	NA	NA
CD25 on memory B cell || id:ebi-a-GCST90001790	Inflammatory bowel disease	Weighted median	18	0.0402218	0.0408532	0.324849	1.04104	0.960933	1.12783	NA	NA	NA	NA
CD25 on naive-mature B cell || id:ebi-a-GCST90001791	Inflammatory bowel disease	Inverse variance weighted	17	0.0836057	0.032751	0.010687	1.0872	1.0196	1.15928	16.6184	0.410699	0.000908152	0.944772
CD25 on naive-mature B cell || id:ebi-a-GCST90001791	Inflammatory bowel disease	MR Egger	17	0.0791412	0.071837	0.287966	1.08236	0.940203	1.246	16.6129	0.342529	NA	NA
CD25 on naive-mature B cell || id:ebi-a-GCST90001791	Inflammatory bowel disease	Weighted median	17	0.0561306	0.0464137	0.226527	1.05774	0.96576	1.15847	NA	NA	NA	NA
CD25 on unswitched memory B cell || id:ebi-a-GCST90001792	Inflammatory bowel disease	Inverse variance weighted	17	-0.0265569	0.0383897	0.489082	0.973793	0.90321	1.04989	29.9638	0.0181907	-0.00624945	0.74881
CD25 on unswitched memory B cell || id:ebi-a-GCST90001792	Inflammatory bowel disease	MR Egger	17	0.00270002	0.0980166	0.978387	1.0027	0.827445	1.21508	29.7528	0.0128447	NA	NA
CD25 on unswitched memory B cell || id:ebi-a-GCST90001792	Inflammatory bowel disease	Weighted median	17	0.0389365	0.0412791	0.345553	1.0397	0.958898	1.12732	NA	NA	NA	NA
CD25 on switched memory B cell || id:ebi-a-GCST90001793	Inflammatory bowel disease	Inverse variance weighted	17	-4.45e-05	0.0365783	0.99903	0.999956	0.930775	1.07428	21.4193	0.162952	0.00963827	0.522095
CD25 on switched memory B cell || id:ebi-a-GCST90001793	Inflammatory bowel disease	MR Egger	17	-0.0515789	0.0869997	0.562105	0.949729	0.800837	1.1263	20.8228	0.142586	NA	NA
CD25 on switched memory B cell || id:ebi-a-GCST90001793	Inflammatory bowel disease	Weighted median	17	0.0141053	0.0449328	0.753582	1.01421	0.928706	1.10758	NA	NA	NA	NA
CD25 on IgD+ B cell || id:ebi-a-GCST90001794	Inflammatory bowel disease	Inverse variance weighted	13	0.078053	0.0451616	0.0839336	1.08118	0.989591	1.18125	16.2888	0.178364	-0.00312006	0.874024
CD25 on IgD+ B cell || id:ebi-a-GCST90001794	Inflammatory bowel disease	MR Egger	13	0.0936338	0.106946	0.400002	1.09816	0.890493	1.35425	16.2499	0.132104	NA	NA
CD25 on IgD+ B cell || id:ebi-a-GCST90001794	Inflammatory bowel disease	Weighted median	13	0.0809448	0.060206	0.178798	1.08431	0.963619	1.22012	NA	NA	NA	NA
CD25 on transitional B cell || id:ebi-a-GCST90001795	Inflammatory bowel disease	Inverse variance weighted	15	0.0522177	0.0416	0.209394	1.05361	0.971107	1.14311	17.8736	0.212598	0.00857356	0.693785
CD25 on transitional B cell || id:ebi-a-GCST90001795	Inflammatory bowel disease	MR Egger	15	0.00431213	0.126489	0.973323	1.00432	0.783796	1.28689	17.6535	0.171124	NA	NA
CD25 on transitional B cell || id:ebi-a-GCST90001795	Inflammatory bowel disease	Weighted median	15	0.0443977	0.0507781	0.381928	1.0454	0.946365	1.15479	NA	NA	NA	NA
CD27 on CD20- B cell || id:ebi-a-GCST90001796	Inflammatory bowel disease	Inverse variance weighted	9	0.0237114	0.0581076	0.683229	1.02399	0.913767	1.14752	10.5174	0.230573	-0.0512059	0.243725
CD27 on CD20- B cell || id:ebi-a-GCST90001796	Inflammatory bowel disease	MR Egger	9	0.366198	0.274839	0.224463	1.44224	0.84157	2.47164	8.54072	0.287332	NA	NA
CD27 on CD20- B cell || id:ebi-a-GCST90001796	Inflammatory bowel disease	Weighted median	9	0.00275262	0.0705192	0.968864	1.00276	0.87331	1.15139	NA	NA	NA	NA
CD27 on CD20- CD38- B cell || id:ebi-a-GCST90001797	Inflammatory bowel disease	Inverse variance weighted	13	0.010056	0.0573163	0.860728	1.01011	0.902773	1.1302	20.5361	0.057601	0.0584031	0.182883
CD27 on CD20- CD38- B cell || id:ebi-a-GCST90001797	Inflammatory bowel disease	MR Egger	13	-0.412694	0.302433	0.19965	0.661865	0.365875	1.19731	17.3489	0.0979707	NA	NA
CD27 on CD20- CD38- B cell || id:ebi-a-GCST90001797	Inflammatory bowel disease	Weighted median	13	0.0247673	0.0583738	0.671356	1.02508	0.914255	1.14933	NA	NA	NA	NA
CD27 on CD24+ CD27+ B cell || id:ebi-a-GCST90001798	Inflammatory bowel disease	Inverse variance weighted	21	0.12306	0.0341823	0.000318086	1.13095	1.05766	1.20932	49.009	0.000306545	0.0110914	0.567041
CD27 on CD24+ CD27+ B cell || id:ebi-a-GCST90001798	Inflammatory bowel disease	MR Egger	21	0.089196	0.0677308	0.203529	1.09329	0.957379	1.24851	48.149	0.000244111	NA	NA
CD27 on CD24+ CD27+ B cell || id:ebi-a-GCST90001798	Inflammatory bowel disease	Weighted median	21	0.122322	0.0297153	3.85e-05	1.13012	1.06618	1.19789	NA	NA	NA	NA
CD27 on T cell || id:ebi-a-GCST90001799	Inflammatory bowel disease	Inverse variance weighted	15	0.11992	0.0592985	0.0431443	1.12741	1.0037	1.26636	52.3073	2.49e-06	-0.019401	0.655942
CD27 on T cell || id:ebi-a-GCST90001799	Inflammatory bowel disease	MR Egger	15	0.194642	0.174882	0.285868	1.21488	0.862323	1.71157	51.484	1.66e-06	NA	NA
CD27 on T cell || id:ebi-a-GCST90001799	Inflammatory bowel disease	Weighted median	15	0.0294422	0.0574482	0.608302	1.02988	0.920207	1.15262	NA	NA	NA	NA
CD27 on IgD+ CD24+ B cell || id:ebi-a-GCST90001800	Inflammatory bowel disease	Inverse variance weighted	24	0.0883798	0.0235607	0.000176021	1.0924	1.0431	1.14403	25.1883	0.340652	-0.00945529	0.345692
CD27 on IgD+ CD24+ B cell || id:ebi-a-GCST90001800	Inflammatory bowel disease	MR Egger	24	0.127117	0.0466124	0.0123056	1.13555	1.0364	1.24418	24.1681	0.33848	NA	NA
CD27 on IgD+ CD24+ B cell || id:ebi-a-GCST90001800	Inflammatory bowel disease	Weighted median	24	0.129368	0.0336444	0.000120467	1.13811	1.06548	1.21569	NA	NA	NA	NA
CD27 on IgD+ CD38- unswitched memory B cell || id:ebi-a-GCST90001801	Inflammatory bowel disease	Inverse variance weighted	16	0.0517788	0.0266617	0.0521292	1.05314	0.999522	1.10964	24.6451	0.0549174	-0.0358362	0.0373458
CD27 on IgD+ CD38- unswitched memory B cell || id:ebi-a-GCST90001801	Inflammatory bowel disease	MR Egger	16	0.148111	0.04803	0.00808984	1.15964	1.05546	1.27411	17.8863	0.21201	NA	NA
CD27 on IgD+ CD38- unswitched memory B cell || id:ebi-a-GCST90001801	Inflammatory bowel disease	Weighted median	16	0.0631945	0.0301375	0.0360049	1.06523	1.00413	1.13005	NA	NA	NA	NA
CD27 on IgD- CD38- B cell || id:ebi-a-GCST90001802	Inflammatory bowel disease	Inverse variance weighted	24	0.0854628	0.0423463	0.0435717	1.08922	1.00247	1.18348	96.255	6.19e-11	-0.018503	0.33696
CD27 on IgD- CD38- B cell || id:ebi-a-GCST90001802	Inflammatory bowel disease	MR Egger	24	0.156747	0.0840808	0.0756867	1.1697	0.991981	1.37926	92.2161	1.43e-10	NA	NA
CD27 on IgD- CD38- B cell || id:ebi-a-GCST90001802	Inflammatory bowel disease	Weighted median	24	0.0975941	0.0339298	0.00402295	1.10252	1.03158	1.17833	NA	NA	NA	NA
CD27 on IgD- CD38+ B cell || id:ebi-a-GCST90001803	Inflammatory bowel disease	Inverse variance weighted	13	0.0836383	0.0549836	0.128222	1.08724	0.976159	1.21095	20.6643	0.0555174	-0.0507596	0.222064
CD27 on IgD- CD38+ B cell || id:ebi-a-GCST90001803	Inflammatory bowel disease	MR Egger	13	0.410272	0.257966	0.14005	1.50723	0.909062	2.49899	17.9331	0.0831454	NA	NA
CD27 on IgD- CD38+ B cell || id:ebi-a-GCST90001803	Inflammatory bowel disease	Weighted median	13	0.112795	0.0620683	0.0691752	1.1194	0.99118	1.26421	NA	NA	NA	NA
CD27 on IgD- CD38dim B cell || id:ebi-a-GCST90001804	Inflammatory bowel disease	Inverse variance weighted	21	0.0912767	0.0429278	0.0334794	1.09557	1.00716	1.19174	90.1081	7.1e-11	-0.00696497	0.713832
CD27 on IgD- CD38dim B cell || id:ebi-a-GCST90001804	Inflammatory bowel disease	MR Egger	21	0.115341	0.0781342	0.156275	1.12226	0.962903	1.30798	89.4557	4.14e-11	NA	NA
CD27 on IgD- CD38dim B cell || id:ebi-a-GCST90001804	Inflammatory bowel disease	Weighted median	21	0.101921	0.0275526	0.000216337	1.1073	1.04908	1.16874	NA	NA	NA	NA
CD27 on memory B cell || id:ebi-a-GCST90001805	Inflammatory bowel disease	Inverse variance weighted	18	0.0561734	0.0371802	0.130829	1.05778	0.983439	1.13774	38.5816	0.0020431	-0.0388843	0.0245324
CD27 on memory B cell || id:ebi-a-GCST90001805	Inflammatory bowel disease	MR Egger	18	0.189844	0.0629301	0.00818836	1.20906	1.06876	1.36778	27.8546	0.0329073	NA	NA
CD27 on memory B cell || id:ebi-a-GCST90001805	Inflammatory bowel disease	Weighted median	18	0.140098	0.0347425	5.52e-05	1.15039	1.07466	1.23145	NA	NA	NA	NA
CD27 on unswitched memory B cell || id:ebi-a-GCST90001806	Inflammatory bowel disease	Inverse variance weighted	23	0.107776	0.0391261	0.00587695	1.1138	1.03158	1.20257	62.5529	9.29e-06	0.00171413	0.930288
CD27 on unswitched memory B cell || id:ebi-a-GCST90001806	Inflammatory bowel disease	MR Egger	23	0.101262	0.0837627	0.240134	1.10657	0.939025	1.304	62.5295	5.25e-06	NA	NA
CD27 on unswitched memory B cell || id:ebi-a-GCST90001806	Inflammatory bowel disease	Weighted median	23	0.138875	0.0333886	3.19e-05	1.14898	1.0762	1.22669	NA	NA	NA	NA
CD27 on Plasma Blast-Plasma Cell || id:ebi-a-GCST90001807	Inflammatory bowel disease	Inverse variance weighted	14	0.193235	0.0813068	0.0174724	1.21317	1.03445	1.42276	42.5749	5.27e-05	0.0537781	0.434999
CD27 on Plasma Blast-Plasma Cell || id:ebi-a-GCST90001807	Inflammatory bowel disease	MR Egger	14	-0.153729	0.437421	0.731348	0.857504	0.363827	2.02105	40.3798	6.22e-05	NA	NA
CD27 on Plasma Blast-Plasma Cell || id:ebi-a-GCST90001807	Inflammatory bowel disease	Weighted median	14	0.118712	0.0644513	0.0654922	1.12605	0.992416	1.27767	NA	NA	NA	NA
CD27 on switched memory B cell || id:ebi-a-GCST90001808	Inflammatory bowel disease	Inverse variance weighted	22	0.107248	0.0300706	0.000361736	1.11321	1.0495	1.18079	52.5997	0.0001569	-0.00725747	0.691885
CD27 on switched memory B cell || id:ebi-a-GCST90001808	Inflammatory bowel disease	MR Egger	22	0.127949	0.0599372	0.0453459	1.13649	1.01053	1.27817	52.1779	0.000107252	NA	NA
CD27 on switched memory B cell || id:ebi-a-GCST90001808	Inflammatory bowel disease	Weighted median	22	0.117321	0.029277	6.14e-05	1.12448	1.06177	1.19089	NA	NA	NA	NA
CD38 on CD20- B cell || id:ebi-a-GCST90001809	Inflammatory bowel disease	Inverse variance weighted	14	0.0618747	0.0486341	0.203284	1.06383	0.967105	1.17023	16.5909	0.218688	-0.0143377	0.649564
CD38 on CD20- B cell || id:ebi-a-GCST90001809	Inflammatory bowel disease	MR Egger	14	0.159354	0.215117	0.473075	1.17275	0.769299	1.7878	16.296	0.178053	NA	NA
CD38 on CD20- B cell || id:ebi-a-GCST90001809	Inflammatory bowel disease	Weighted median	14	0.103443	0.0631506	0.101413	1.10898	0.979873	1.2551	NA	NA	NA	NA
CD38 on CD3- CD19- || id:ebi-a-GCST90001810	Inflammatory bowel disease	Inverse variance weighted	12	-0.0464889	0.0331244	0.160479	0.954575	0.894569	1.01861	11.5619	0.397454	-0.00404572	0.862049
CD38 on CD3- CD19- || id:ebi-a-GCST90001810	Inflammatory bowel disease	MR Egger	12	-0.0292717	0.102605	0.781246	0.971153	0.794234	1.18748	11.5253	0.318081	NA	NA
CD38 on CD3- CD19- || id:ebi-a-GCST90001810	Inflammatory bowel disease	Weighted median	12	-0.0193988	0.0471454	0.68073	0.980788	0.89422	1.07574	NA	NA	NA	NA
CD38 on IgD+ CD24- B cell || id:ebi-a-GCST90001811	Inflammatory bowel disease	Inverse variance weighted	8	0.0185736	0.0457887	0.685009	1.01875	0.931301	1.1144	2.78391	0.904247	0.00962244	0.652209
CD38 on IgD+ CD24- B cell || id:ebi-a-GCST90001811	Inflammatory bowel disease	MR Egger	8	-0.0368104	0.125479	0.77913	0.963859	0.753708	1.2326	2.55917	0.861788	NA	NA
CD38 on IgD+ CD24- B cell || id:ebi-a-GCST90001811	Inflammatory bowel disease	Weighted median	8	-0.015129	0.0605984	0.80285	0.984985	0.874676	1.10921	NA	NA	NA	NA
CD38 on IgD+ CD38+ B cell || id:ebi-a-GCST90001812	Inflammatory bowel disease	Inverse variance weighted	7	0.030215	0.0878932	0.731019	1.03068	0.867573	1.22444	16.9236	0.00956819	0.0394004	0.416311
CD38 on IgD+ CD38+ B cell || id:ebi-a-GCST90001812	Inflammatory bowel disease	MR Egger	7	-0.145481	0.217621	0.533428	0.864607	0.564386	1.32453	14.6283	0.0120746	NA	NA
CD38 on IgD+ CD38+ B cell || id:ebi-a-GCST90001812	Inflammatory bowel disease	Weighted median	7	-0.0788106	0.0743292	0.289013	0.924215	0.798919	1.06916	NA	NA	NA	NA
CD38 on IgD+ CD38dim B cell || id:ebi-a-GCST90001813	Inflammatory bowel disease	Inverse variance weighted	11	-0.00929962	0.0427738	0.827886	0.990743	0.911069	1.07739	9.36897	0.497481	-0.00332833	0.878371
CD38 on IgD+ CD38dim B cell || id:ebi-a-GCST90001813	Inflammatory bowel disease	MR Egger	11	0.00819061	0.119332	0.946779	1.00822	0.797958	1.2739	9.34324	0.406213	NA	NA
CD38 on IgD+ CD38dim B cell || id:ebi-a-GCST90001813	Inflammatory bowel disease	Weighted median	11	-0.0420198	0.0594751	0.47987	0.958851	0.853345	1.0774	NA	NA	NA	NA
CD38 on IgD- CD38+ B cell || id:ebi-a-GCST90001814	Inflammatory bowel disease	Inverse variance weighted	8	0.044648	0.0591762	0.450554	1.04566	0.931148	1.17425	5.10236	0.647473	-0.00962619	0.833793
CD38 on IgD- CD38+ B cell || id:ebi-a-GCST90001814	Inflammatory bowel disease	MR Egger	8	0.114675	0.324962	0.73624	1.12151	0.593184	2.12039	5.05433	0.536864	NA	NA
CD38 on IgD- CD38+ B cell || id:ebi-a-GCST90001814	Inflammatory bowel disease	Weighted median	8	-0.0129285	0.0771001	0.866831	0.987155	0.848704	1.14819	NA	NA	NA	NA
CD38 on IgD- CD38dim B cell || id:ebi-a-GCST90001815	Inflammatory bowel disease	Inverse variance weighted	9	0.0993658	0.0987697	0.314399	1.10447	0.91008	1.34038	28.8221	0.000340719	0.0112492	0.797729
CD38 on IgD- CD38dim B cell || id:ebi-a-GCST90001815	Inflammatory bowel disease	MR Egger	9	0.0386504	0.251087	0.882007	1.03941	0.635413	1.70026	28.5331	0.000175969	NA	NA
CD38 on IgD- CD38dim B cell || id:ebi-a-GCST90001815	Inflammatory bowel disease	Weighted median	9	0.0571788	0.0756889	0.449982	1.05885	0.912861	1.22817	NA	NA	NA	NA
CD38 on naive-mature B cell || id:ebi-a-GCST90001816	Inflammatory bowel disease	Inverse variance weighted	16	0.0245489	0.0345773	0.477722	1.02485	0.957698	1.09672	15.6547	0.405362	-0.00341273	0.857696
CD38 on naive-mature B cell || id:ebi-a-GCST90001816	Inflammatory bowel disease	MR Egger	16	0.044649	0.115711	0.705396	1.04566	0.833481	1.31186	15.6175	0.337285	NA	NA
CD38 on naive-mature B cell || id:ebi-a-GCST90001816	Inflammatory bowel disease	Weighted median	16	0.0145443	0.0471454	0.757702	1.01465	0.925093	1.11288	NA	NA	NA	NA
CD38 on Plasma Blast-Plasma Cell || id:ebi-a-GCST90001817	Inflammatory bowel disease	Inverse variance weighted	12	0.079637	0.106671	0.455324	1.08289	0.87859	1.33471	57.3018	2.93e-08	0.0539645	0.463403
CD38 on Plasma Blast-Plasma Cell || id:ebi-a-GCST90001817	Inflammatory bowel disease	MR Egger	12	-0.314352	0.52807	0.56488	0.730262	0.259404	2.0558	54.1537	4.54e-08	NA	NA
CD38 on Plasma Blast-Plasma Cell || id:ebi-a-GCST90001817	Inflammatory bowel disease	Weighted median	12	0.00708378	0.0659593	0.914475	1.00711	0.884975	1.1461	NA	NA	NA	NA
CD38 on IgD+ B cell || id:ebi-a-GCST90001818	Inflammatory bowel disease	Inverse variance weighted	11	-0.0608316	0.0667207	0.361908	0.940982	0.825634	1.07244	15.9804	0.100196	0.0298506	0.374168
CD38 on IgD+ B cell || id:ebi-a-GCST90001818	Inflammatory bowel disease	MR Egger	11	-0.261015	0.224369	0.274611	0.77027	0.496199	1.19572	14.5654	0.103587	NA	NA
CD38 on IgD+ B cell || id:ebi-a-GCST90001818	Inflammatory bowel disease	Weighted median	11	-0.0199237	0.0812396	0.806265	0.980273	0.835978	1.14948	NA	NA	NA	NA
CD38 on transitional B cell || id:ebi-a-GCST90001819	Inflammatory bowel disease	Inverse variance weighted	12	-0.0434749	0.0399764	0.276809	0.957457	0.8853	1.03549	11.8606	0.374216	-0.0112477	0.593594
CD38 on transitional B cell || id:ebi-a-GCST90001819	Inflammatory bowel disease	MR Egger	12	0.00930577	0.104284	0.930657	1.00935	0.82276	1.23825	11.5108	0.319127	NA	NA
CD38 on transitional B cell || id:ebi-a-GCST90001819	Inflammatory bowel disease	Weighted median	12	-0.0305438	0.0542807	0.573639	0.969918	0.872028	1.0788	NA	NA	NA	NA
IgD on IgD+ CD24+ B cell || id:ebi-a-GCST90001820	Inflammatory bowel disease	Inverse variance weighted	18	-0.0174108	0.0367244	0.635433	0.98274	0.914488	1.05609	29.9652	0.0265971	-0.00849524	0.605237
IgD on IgD+ CD24+ B cell || id:ebi-a-GCST90001820	Inflammatory bowel disease	MR Egger	18	0.0160748	0.0737673	0.830252	1.0162	0.879406	1.17428	29.4534	0.021052	NA	NA
IgD on IgD+ CD24+ B cell || id:ebi-a-GCST90001820	Inflammatory bowel disease	Weighted median	18	0.0395081	0.0392274	0.31386	1.0403	0.963312	1.12344	NA	NA	NA	NA
IgD on IgD+ CD24- B cell || id:ebi-a-GCST90001821	Inflammatory bowel disease	Inverse variance weighted	23	0.0245542	0.0283566	0.386542	1.02486	0.969452	1.08343	28.8383	0.149535	0.00235629	0.829619
IgD on IgD+ CD24- B cell || id:ebi-a-GCST90001821	Inflammatory bowel disease	MR Egger	23	0.0141276	0.0559498	0.803106	1.01423	0.908887	1.13178	28.7733	0.119552	NA	NA
IgD on IgD+ CD24- B cell || id:ebi-a-GCST90001821	Inflammatory bowel disease	Weighted median	23	0.0267918	0.0358423	0.454767	1.02715	0.957472	1.10191	NA	NA	NA	NA
IgD on IgD+ CD38- B cell || id:ebi-a-GCST90001822	Inflammatory bowel disease	Inverse variance weighted	19	0.0254445	0.0323307	0.431277	1.02577	0.962786	1.09288	22.3815	0.215487	-0.00303144	0.829938
IgD on IgD+ CD38- B cell || id:ebi-a-GCST90001822	Inflammatory bowel disease	MR Egger	19	0.0401476	0.0751523	0.600109	1.04096	0.89839	1.20617	22.3191	0.172758	NA	NA
IgD on IgD+ CD38- B cell || id:ebi-a-GCST90001822	Inflammatory bowel disease	Weighted median	19	0.0474633	0.04245	0.263525	1.04861	0.964892	1.13959	NA	NA	NA	NA
IgD on IgD+ CD38- unswitched memory B cell || id:ebi-a-GCST90001823	Inflammatory bowel disease	Inverse variance weighted	14	0.00402735	0.032278	0.900705	1.00404	0.942483	1.06961	19.0645	0.121118	-0.011001	0.55903
IgD on IgD+ CD38- unswitched memory B cell || id:ebi-a-GCST90001823	Inflammatory bowel disease	MR Egger	14	0.0377103	0.0650913	0.573072	1.03843	0.914051	1.17973	18.5074	0.101129	NA	NA
IgD on IgD+ CD38- unswitched memory B cell || id:ebi-a-GCST90001823	Inflammatory bowel disease	Weighted median	14	0.0445388	0.0360039	0.216067	1.04555	0.974307	1.12199	NA	NA	NA	NA
IgD on IgD+ CD38+ B cell || id:ebi-a-GCST90001824	Inflammatory bowel disease	Inverse variance weighted	19	0.0196323	0.0243266	0.419648	1.01983	0.972342	1.06963	14.4227	0.701148	-0.0121061	0.249164
IgD on IgD+ CD38+ B cell || id:ebi-a-GCST90001824	Inflammatory bowel disease	MR Egger	19	0.0676618	0.0470314	0.168406	1.07	0.975778	1.17333	12.9989	0.736259	NA	NA
IgD on IgD+ CD38+ B cell || id:ebi-a-GCST90001824	Inflammatory bowel disease	Weighted median	19	0.041819	0.0344388	0.224634	1.04271	0.974646	1.11552	NA	NA	NA	NA
IgD on IgD+ CD38dim B cell || id:ebi-a-GCST90001825	Inflammatory bowel disease	Inverse variance weighted	14	0.0397964	0.0389025	0.306318	1.0406	0.964204	1.12305	26.608	0.0140715	0.0178111	0.358993
IgD on IgD+ CD38dim B cell || id:ebi-a-GCST90001825	Inflammatory bowel disease	MR Egger	14	-0.0272063	0.0803652	0.740811	0.97316	0.831335	1.13918	24.7329	0.0161407	NA	NA
IgD on IgD+ CD38dim B cell || id:ebi-a-GCST90001825	Inflammatory bowel disease	Weighted median	14	0.0346772	0.0381913	0.363884	1.03529	0.960619	1.11576	NA	NA	NA	NA
IgD on unswitched memory B cell || id:ebi-a-GCST90001826	Inflammatory bowel disease	Inverse variance weighted	13	-0.0522306	0.0408785	0.201354	0.94911	0.876032	1.02828	20.3816	0.0602025	-0.0291318	0.127656
IgD on unswitched memory B cell || id:ebi-a-GCST90001826	Inflammatory bowel disease	MR Egger	13	0.0485018	0.0721087	0.515069	1.0497	0.911347	1.20905	16.3471	0.128728	NA	NA
IgD on unswitched memory B cell || id:ebi-a-GCST90001826	Inflammatory bowel disease	Weighted median	13	0.0321599	0.0453599	0.478328	1.03268	0.944835	1.1287	NA	NA	NA	NA
IgD on IgD+ B cell || id:ebi-a-GCST90001827	Inflammatory bowel disease	Inverse variance weighted	16	0.0173688	0.02759	0.529001	1.01752	0.963958	1.07406	14.5833	0.481832	-0.00205669	0.856478
IgD on IgD+ B cell || id:ebi-a-GCST90001827	Inflammatory bowel disease	MR Egger	16	0.0265772	0.0573532	0.650204	1.02693	0.917746	1.14911	14.548	0.409734	NA	NA
IgD on IgD+ B cell || id:ebi-a-GCST90001827	Inflammatory bowel disease	Weighted median	16	0.0335608	0.0385012	0.383381	1.03413	0.958964	1.11519	NA	NA	NA	NA
IgD on transitional B cell || id:ebi-a-GCST90001828	Inflammatory bowel disease	Inverse variance weighted	22	0.0202094	0.0260915	0.438601	1.02041	0.969543	1.07396	18.9944	0.585501	-0.00939733	0.357025
IgD on transitional B cell || id:ebi-a-GCST90001828	Inflammatory bowel disease	MR Egger	22	0.0671492	0.0562093	0.246208	1.06945	0.957891	1.19401	18.1055	0.58046	NA	NA
IgD on transitional B cell || id:ebi-a-GCST90001828	Inflammatory bowel disease	Weighted median	22	0.0500506	0.0386409	0.195226	1.05132	0.974641	1.13404	NA	NA	NA	NA
BAFF-R on B cell || id:ebi-a-GCST90001829	Inflammatory bowel disease	Inverse variance weighted	14	0.0382283	0.0414788	0.356719	1.03897	0.957844	1.12696	59.4376	6.62e-08	0.0242654	0.260119
BAFF-R on B cell || id:ebi-a-GCST90001829	Inflammatory bowel disease	MR Egger	14	-0.00551113	0.0551268	0.922017	0.994504	0.892651	1.10798	53.2396	3.73e-07	NA	NA
BAFF-R on B cell || id:ebi-a-GCST90001829	Inflammatory bowel disease	Weighted median	14	0.0158525	0.0212969	0.456661	1.01598	0.974443	1.05929	NA	NA	NA	NA
BAFF-R on CD20- B cell || id:ebi-a-GCST90001830	Inflammatory bowel disease	Inverse variance weighted	7	0.050881	0.0517036	0.325071	1.0522	0.950794	1.16442	3.04837	0.802751	0.0185981	0.506031
BAFF-R on CD20- B cell || id:ebi-a-GCST90001830	Inflammatory bowel disease	MR Egger	7	-0.0284376	0.122252	0.825283	0.971963	0.764868	1.23513	2.53572	0.771106	NA	NA
BAFF-R on CD20- B cell || id:ebi-a-GCST90001830	Inflammatory bowel disease	Weighted median	7	0.0100909	0.0628483	0.87244	1.01014	0.893069	1.14256	NA	NA	NA	NA
CD62L on CD62L+ myeloid Dendritic Cell || id:ebi-a-GCST90001831	Inflammatory bowel disease	Inverse variance weighted	13	0.00454256	0.0327431	0.889661	1.00455	0.942109	1.07114	6.89747	0.864314	5.88e-05	0.997356
CD62L on CD62L+ myeloid Dendritic Cell || id:ebi-a-GCST90001831	Inflammatory bowel disease	MR Egger	13	0.00425171	0.0918422	0.963906	1.00426	0.83882	1.20233	6.89746	0.807326	NA	NA
CD62L on CD62L+ myeloid Dendritic Cell || id:ebi-a-GCST90001831	Inflammatory bowel disease	Weighted median	13	0.00218451	0.0430403	0.959521	1.00219	0.921111	1.0904	NA	NA	NA	NA
CD62L on CD62L+ plasmacytoid Dendritic Cell || id:ebi-a-GCST90001832	Inflammatory bowel disease	Inverse variance weighted	10	-0.0473474	0.0577058	0.411933	0.953756	0.85176	1.06797	23.9834	0.00432759	-0.0431828	0.189165
CD62L on CD62L+ plasmacytoid Dendritic Cell || id:ebi-a-GCST90001832	Inflammatory bowel disease	MR Egger	10	0.168985	0.160317	0.322645	1.1841	0.864817	1.62126	19.073	0.014474	NA	NA
CD62L on CD62L+ plasmacytoid Dendritic Cell || id:ebi-a-GCST90001832	Inflammatory bowel disease	Weighted median	10	0.0190794	0.0501877	0.703826	1.01926	0.923773	1.12462	NA	NA	NA	NA
CD62L on CD62L+ Dendritic Cell || id:ebi-a-GCST90001833	Inflammatory bowel disease	Inverse variance weighted	20	-0.0607301	0.0359181	0.0908758	0.941077	0.877104	1.00972	30.7828	0.0426439	-0.0356795	0.083005
CD62L on CD62L+ Dendritic Cell || id:ebi-a-GCST90001833	Inflammatory bowel disease	MR Egger	20	0.1277	0.108099	0.25285	1.13621	0.91927	1.40435	25.9294	0.101384	NA	NA
CD62L on CD62L+ Dendritic Cell || id:ebi-a-GCST90001833	Inflammatory bowel disease	Weighted median	20	-0.0334904	0.0411666	0.415912	0.967064	0.8921	1.04833	NA	NA	NA	NA
CD62L on monocyte || id:ebi-a-GCST90001834	Inflammatory bowel disease	Inverse variance weighted	15	0.00730246	0.0315646	0.817043	1.00733	0.946898	1.07162	18.5393	0.183312	0.006335	0.701783
CD62L on monocyte || id:ebi-a-GCST90001834	Inflammatory bowel disease	MR Egger	15	-0.0180448	0.0724751	0.807267	0.982117	0.852062	1.13202	18.3232	0.145627	NA	NA
CD62L on monocyte || id:ebi-a-GCST90001834	Inflammatory bowel disease	Weighted median	15	-0.00466311	0.0367668	0.899075	0.995348	0.926144	1.06972	NA	NA	NA	NA
CD62L on granulocyte || id:ebi-a-GCST90001835	Inflammatory bowel disease	Inverse variance weighted	13	-0.0407495	0.070458	0.563027	0.96007	0.836234	1.10224	37.7294	0.000170011	-0.000900316	0.98264
CD62L on granulocyte || id:ebi-a-GCST90001835	Inflammatory bowel disease	MR Egger	13	-0.0354038	0.251183	0.890459	0.965216	0.589947	1.57919	37.7277	8.7e-05	NA	NA
CD62L on granulocyte || id:ebi-a-GCST90001835	Inflammatory bowel disease	Weighted median	13	-0.0179204	0.0586953	0.760128	0.982239	0.875497	1.102	NA	NA	NA	NA
CD66b on CD66b++ myeloid cell || id:ebi-a-GCST90001836	Inflammatory bowel disease	Inverse variance weighted	20	-0.0259073	0.0315164	0.411062	0.974425	0.916054	1.03652	30.8679	0.0417402	0.0124799	0.618404
CD66b on CD66b++ myeloid cell || id:ebi-a-GCST90001836	Inflammatory bowel disease	MR Egger	20	-0.0728992	0.0981279	0.467128	0.929695	0.76703	1.12686	30.4336	0.0334386	NA	NA
CD66b on CD66b++ myeloid cell || id:ebi-a-GCST90001836	Inflammatory bowel disease	Weighted median	20	-0.0395482	0.0378816	0.296487	0.961224	0.89244	1.03531	NA	NA	NA	NA
CD66b on Granulocytic Myeloid-Derived Suppressor Cells || id:ebi-a-GCST90001837	Inflammatory bowel disease	Inverse variance weighted	16	0.0114951	0.0218032	0.59804	1.01156	0.969244	1.05573	13.88	0.534652	-0.000908818	0.957329
CD66b on Granulocytic Myeloid-Derived Suppressor Cells || id:ebi-a-GCST90001837	Inflammatory bowel disease	MR Egger	16	0.0150439	0.0687004	0.829827	1.01516	0.887267	1.16148	13.877	0.458915	NA	NA
CD66b on Granulocytic Myeloid-Derived Suppressor Cells || id:ebi-a-GCST90001837	Inflammatory bowel disease	Weighted median	16	0.0135569	0.0294339	0.645094	1.01365	0.956826	1.07385	NA	NA	NA	NA
CD3 on naive CD8+ T cell || id:ebi-a-GCST90001838	Inflammatory bowel disease	Inverse variance weighted	19	-0.0132541	0.0198379	0.504057	0.986833	0.949199	1.02596	14.0398	0.726496	0.00143592	0.88253
CD3 on naive CD8+ T cell || id:ebi-a-GCST90001838	Inflammatory bowel disease	MR Egger	19	-0.0178105	0.0362805	0.629765	0.982347	0.914919	1.05475	14.0173	0.66588	NA	NA
CD3 on naive CD8+ T cell || id:ebi-a-GCST90001838	Inflammatory bowel disease	Weighted median	19	0.00211528	0.0265727	0.936553	1.00212	0.951261	1.05569	NA	NA	NA	NA
CD3 on Effector Memory CD8+ T cell || id:ebi-a-GCST90001839	Inflammatory bowel disease	Inverse variance weighted	15	0.0042714	0.0304247	0.88835	1.00428	0.946143	1.06599	12.981	0.528024	-0.0117031	0.46067
CD3 on Effector Memory CD8+ T cell || id:ebi-a-GCST90001839	Inflammatory bowel disease	MR Egger	15	0.0606196	0.0801193	0.462772	1.06249	0.908088	1.24316	12.403	0.494909	NA	NA
CD3 on Effector Memory CD8+ T cell || id:ebi-a-GCST90001839	Inflammatory bowel disease	Weighted median	15	0.0348522	0.0416697	0.402934	1.03547	0.954259	1.12359	NA	NA	NA	NA
CD3 on Terminally Differentiated CD8+ T cell || id:ebi-a-GCST90001840	Inflammatory bowel disease	Inverse variance weighted	16	0.0388329	0.0374506	0.299777	1.0396	0.96602	1.11878	17.1929	0.307467	0.0554066	0.0463944
CD3 on Terminally Differentiated CD8+ T cell || id:ebi-a-GCST90001840	Inflammatory bowel disease	MR Egger	16	-0.24154	0.133006	0.0908397	0.785417	0.605179	1.01934	12.4191	0.572685	NA	NA
CD3 on Terminally Differentiated CD8+ T cell || id:ebi-a-GCST90001840	Inflammatory bowel disease	Weighted median	16	0.0110299	0.0458121	0.809739	1.01109	0.92426	1.10608	NA	NA	NA	NA
CD3 on Central Memory CD4+ T cell || id:ebi-a-GCST90001841	Inflammatory bowel disease	Inverse variance weighted	19	-0.00135105	0.029391	0.963336	0.99865	0.942747	1.05787	33.6164	0.0140413	0.00148204	0.918837
CD3 on Central Memory CD4+ T cell || id:ebi-a-GCST90001841	Inflammatory bowel disease	MR Egger	19	-0.00643745	0.0577299	0.912518	0.993583	0.887286	1.11262	33.5952	0.00946531	NA	NA
CD3 on Central Memory CD4+ T cell || id:ebi-a-GCST90001841	Inflammatory bowel disease	Weighted median	19	-0.00264813	0.0280013	0.924655	0.997355	0.944093	1.05362	NA	NA	NA	NA
CD3 on Naive CD4+ T cell || id:ebi-a-GCST90001842	Inflammatory bowel disease	Inverse variance weighted	20	0.00707284	0.0212101	0.738783	1.0071	0.966089	1.04985	23.1927	0.228959	0.00480388	0.605636
CD3 on Naive CD4+ T cell || id:ebi-a-GCST90001842	Inflammatory bowel disease	MR Egger	20	-0.00733887	0.0349249	0.835924	0.992688	0.927009	1.06302	22.8423	0.196724	NA	NA
CD3 on Naive CD4+ T cell || id:ebi-a-GCST90001842	Inflammatory bowel disease	Weighted median	20	-0.00367956	0.0235772	0.875983	0.996327	0.951333	1.04345	NA	NA	NA	NA
CD3 on Effector Memory CD4+ T cell || id:ebi-a-GCST90001843	Inflammatory bowel disease	Inverse variance weighted	14	0.0171864	0.0255087	0.500474	1.01733	0.967722	1.06949	12.2125	0.510302	0.00872323	0.542272
CD3 on Effector Memory CD4+ T cell || id:ebi-a-GCST90001843	Inflammatory bowel disease	MR Egger	14	-0.0139098	0.0557559	0.807212	0.986187	0.884095	1.10007	11.8191	0.460316	NA	NA
CD3 on Effector Memory CD4+ T cell || id:ebi-a-GCST90001843	Inflammatory bowel disease	Weighted median	14	0.0036957	0.0347331	0.915263	1.0037	0.937648	1.07441	NA	NA	NA	NA
CD3 on Terminally Differentiated CD4+ T cell || id:ebi-a-GCST90001844	Inflammatory bowel disease	Inverse variance weighted	16	-0.0273462	0.0305297	0.370399	0.973024	0.916508	1.03303	14.9202	0.457178	-0.0269472	0.115555
CD3 on Terminally Differentiated CD4+ T cell || id:ebi-a-GCST90001844	Inflammatory bowel disease	MR Egger	16	0.114797	0.0900515	0.223135	1.12165	0.940161	1.33816	12.1051	0.597861	NA	NA
CD3 on Terminally Differentiated CD4+ T cell || id:ebi-a-GCST90001844	Inflammatory bowel disease	Weighted median	16	0.0236205	0.0413879	0.568196	1.0239	0.944122	1.11042	NA	NA	NA	NA
CD3 on CD45RA- CD4+ T cell || id:ebi-a-GCST90001845	Inflammatory bowel disease	Inverse variance weighted	22	0.00536788	0.0250746	0.830488	1.00538	0.957166	1.05603	27.5451	0.153531	0.00245311	0.841164
CD3 on CD45RA- CD4+ T cell || id:ebi-a-GCST90001845	Inflammatory bowel disease	MR Egger	22	-0.00411033	0.053275	0.939268	0.995898	0.897153	1.10551	27.4884	0.122073	NA	NA
CD3 on CD45RA- CD4+ T cell || id:ebi-a-GCST90001845	Inflammatory bowel disease	Weighted median	22	-0.00256155	0.0308723	0.933873	0.997442	0.938877	1.05966	NA	NA	NA	NA
CD3 on Central Memory CD8+ T cell || id:ebi-a-GCST90001846	Inflammatory bowel disease	Inverse variance weighted	15	-0.00233697	0.027254	0.931667	0.997666	0.945771	1.05241	13.1015	0.518547	0.000662809	0.9595
CD3 on Central Memory CD8+ T cell || id:ebi-a-GCST90001846	Inflammatory bowel disease	MR Egger	15	-0.00504277	0.0589935	0.933182	0.99497	0.886326	1.11693	13.0988	0.440209	NA	NA
CD3 on Central Memory CD8+ T cell || id:ebi-a-GCST90001846	Inflammatory bowel disease	Weighted median	15	0.0250832	0.03687	0.496306	1.0254	0.953914	1.10224	NA	NA	NA	NA
CD3 on HLA DR+ T cell || id:ebi-a-GCST90001847	Inflammatory bowel disease	Inverse variance weighted	19	0.0359506	0.0291099	0.216833	1.0366	0.979116	1.09747	22.2704	0.220202	-0.00231458	0.882013
CD3 on HLA DR+ T cell || id:ebi-a-GCST90001847	Inflammatory bowel disease	MR Egger	19	0.0466175	0.0768673	0.552218	1.04772	0.901187	1.21808	22.2407	0.175639	NA	NA
CD3 on HLA DR+ T cell || id:ebi-a-GCST90001847	Inflammatory bowel disease	Weighted median	19	0.0282796	0.0378976	0.455541	1.02868	0.955042	1.108	NA	NA	NA	NA
CD3 on Natural Killer T || id:ebi-a-GCST90001848	Inflammatory bowel disease	Inverse variance weighted	9	-0.0635533	0.0901999	0.48107	0.938424	0.786356	1.1199	26.1075	0.00100671	-0.0718679	0.0607176
CD3 on Natural Killer T || id:ebi-a-GCST90001848	Inflammatory bowel disease	MR Egger	9	0.307179	0.181657	0.134681	1.35958	0.952307	1.94104	15.2478	0.0329505	NA	NA
CD3 on Natural Killer T || id:ebi-a-GCST90001848	Inflammatory bowel disease	Weighted median	9	0.00392719	0.0727239	0.956934	1.00393	0.870566	1.15774	NA	NA	NA	NA
CD3 on HLA DR+ CD4+ T cell || id:ebi-a-GCST90001849	Inflammatory bowel disease	Inverse variance weighted	25	0.0559335	0.0241356	0.0204784	1.05753	1.00866	1.10876	28.9793	0.22091	0.0175647	0.153568
CD3 on HLA DR+ CD4+ T cell || id:ebi-a-GCST90001849	Inflammatory bowel disease	MR Egger	25	-0.0186618	0.0557699	0.740943	0.981511	0.879879	1.09488	26.4726	0.279065	NA	NA
CD3 on HLA DR+ CD4+ T cell || id:ebi-a-GCST90001849	Inflammatory bowel disease	Weighted median	25	0.0304964	0.0339012	0.368352	1.03097	0.964688	1.1018	NA	NA	NA	NA
CD3 on HLA DR+ CD8+ T cell || id:ebi-a-GCST90001850	Inflammatory bowel disease	Inverse variance weighted	16	0.0406948	0.0436526	0.351212	1.04153	0.956127	1.13457	31.1154	0.00847775	-0.00918567	0.758087
CD3 on HLA DR+ CD8+ T cell || id:ebi-a-GCST90001850	Inflammatory bowel disease	MR Egger	16	0.0874033	0.155379	0.582661	1.09134	0.804817	1.47986	30.8977	0.00572925	NA	NA
CD3 on HLA DR+ CD8+ T cell || id:ebi-a-GCST90001850	Inflammatory bowel disease	Weighted median	16	0.0333264	0.0447425	0.456363	1.03389	0.947083	1.12865	NA	NA	NA	NA
CD3 on T cell || id:ebi-a-GCST90001851	Inflammatory bowel disease	Inverse variance weighted	23	0.0188346	0.0241715	0.435859	1.01901	0.971862	1.06845	16.3726	0.796971	0.0043229	0.71213
CD3 on T cell || id:ebi-a-GCST90001851	Inflammatory bowel disease	MR Egger	23	-0.000719792	0.0575973	0.990147	0.99928	0.892606	1.1187	16.2327	0.756435	NA	NA
CD3 on T cell || id:ebi-a-GCST90001851	Inflammatory bowel disease	Weighted median	23	0.0170998	0.0363918	0.638441	1.01725	0.947216	1.09246	NA	NA	NA	NA
CD3 on CD39+ resting CD4 regulatory T cell || id:ebi-a-GCST90001852	Inflammatory bowel disease	Inverse variance weighted	12	0.0422955	0.0334662	0.206292	1.0432	0.976971	1.11392	6.87877	0.808815	0.00288497	0.88671
CD3 on CD39+ resting CD4 regulatory T cell || id:ebi-a-GCST90001852	Inflammatory bowel disease	MR Egger	12	0.0303646	0.0882299	0.737858	1.03083	0.86713	1.22543	6.85741	0.738835	NA	NA
CD3 on CD39+ resting CD4 regulatory T cell || id:ebi-a-GCST90001852	Inflammatory bowel disease	Weighted median	12	0.0303248	0.0453687	0.503873	1.03079	0.943086	1.12665	NA	NA	NA	NA
CD3 on activated CD4 regulatory T cell || id:ebi-a-GCST90001853	Inflammatory bowel disease	Inverse variance weighted	14	-0.00187265	0.0225255	0.933744	0.998129	0.95502	1.04318	13.6354	0.40001	0.010666	0.365377
CD3 on activated CD4 regulatory T cell || id:ebi-a-GCST90001853	Inflammatory bowel disease	MR Egger	14	-0.0309346	0.0382913	0.434885	0.969539	0.899438	1.0451	12.6988	0.391304	NA	NA
CD3 on activated CD4 regulatory T cell || id:ebi-a-GCST90001853	Inflammatory bowel disease	Weighted median	14	-0.000146696	0.0260461	0.995506	0.999853	0.950091	1.05222	NA	NA	NA	NA
CD3 on CD39+ activated CD4 regulatory T cell || id:ebi-a-GCST90001854	Inflammatory bowel disease	Inverse variance weighted	19	-0.0151423	0.0362794	0.676401	0.984972	0.917365	1.05756	49.9121	7.78e-05	-0.0103981	0.603169
CD3 on CD39+ activated CD4 regulatory T cell || id:ebi-a-GCST90001854	Inflammatory bowel disease	MR Egger	19	0.0166425	0.0705096	0.816228	1.01678	0.885541	1.16747	49.1017	5.82e-05	NA	NA
CD3 on CD39+ activated CD4 regulatory T cell || id:ebi-a-GCST90001854	Inflammatory bowel disease	Weighted median	19	0.00233795	0.0279792	0.933406	1.00234	0.948853	1.05884	NA	NA	NA	NA
CD3 on secreting CD4 regulatory T cell || id:ebi-a-GCST90001855	Inflammatory bowel disease	Inverse variance weighted	12	0.0213815	0.0223199	0.338085	1.02161	0.977883	1.0673	8.51	0.667021	0.00716538	0.531797
CD3 on secreting CD4 regulatory T cell || id:ebi-a-GCST90001855	Inflammatory bowel disease	MR Egger	12	0.000888733	0.0387218	0.98214	1.00089	0.927738	1.07981	8.09055	0.619993	NA	NA
CD3 on secreting CD4 regulatory T cell || id:ebi-a-GCST90001855	Inflammatory bowel disease	Weighted median	12	0.000414505	0.0262834	0.987417	1.00041	0.950183	1.0533	NA	NA	NA	NA
CD3 on CD39+ secreting CD4 regulatory T cell || id:ebi-a-GCST90001856	Inflammatory bowel disease	Inverse variance weighted	20	-0.0013917	0.0230482	0.951851	0.998609	0.954501	1.04476	19.3001	0.437741	-0.000799879	0.946611
CD3 on CD39+ secreting CD4 regulatory T cell || id:ebi-a-GCST90001856	Inflammatory bowel disease	MR Egger	20	0.00130244	0.0462037	0.977822	1.0013	0.914611	1.09621	19.2952	0.373862	NA	NA
CD3 on CD39+ secreting CD4 regulatory T cell || id:ebi-a-GCST90001856	Inflammatory bowel disease	Weighted median	20	-0.00323814	0.0317535	0.918775	0.996767	0.936623	1.06077	NA	NA	NA	NA
CD3 on activated & secreting CD4 regulatory T cell || id:ebi-a-GCST90001857	Inflammatory bowel disease	Inverse variance weighted	12	0.00742828	0.0223513	0.739631	1.00746	0.964274	1.05257	2.5135	0.995722	0.00725894	0.506294
CD3 on activated & secreting CD4 regulatory T cell || id:ebi-a-GCST90001857	Inflammatory bowel disease	MR Egger	12	-0.0124193	0.0364498	0.740362	0.987658	0.919559	1.0608	2.03833	0.996038	NA	NA
CD3 on activated & secreting CD4 regulatory T cell || id:ebi-a-GCST90001857	Inflammatory bowel disease	Weighted median	12	-0.000715795	0.0262653	0.978258	0.999284	0.949143	1.05207	NA	NA	NA	NA
CD3 on CD45RA+ CD4+ T cell || id:ebi-a-GCST90001858	Inflammatory bowel disease	Inverse variance weighted	21	-0.0202682	0.0249345	0.416299	0.979936	0.933196	1.02902	32.5814	0.0374836	-0.00632918	0.559762
CD3 on CD45RA+ CD4+ T cell || id:ebi-a-GCST90001858	Inflammatory bowel disease	MR Egger	21	0.000637859	0.0433913	0.988425	1.00064	0.919055	1.08946	31.9881	0.0313511	NA	NA
CD3 on CD45RA+ CD4+ T cell || id:ebi-a-GCST90001858	Inflammatory bowel disease	Weighted median	21	-0.00922586	0.0251178	0.713393	0.990817	0.943219	1.04082	NA	NA	NA	NA
CD3 on CD8+ T cell || id:ebi-a-GCST90001859	Inflammatory bowel disease	Inverse variance weighted	18	0.0229854	0.0262851	0.381864	1.02325	0.97187	1.07735	14.8203	0.608421	-0.0160874	0.211698
CD3 on CD8+ T cell || id:ebi-a-GCST90001859	Inflammatory bowel disease	MR Egger	18	0.0954958	0.0616233	0.140773	1.1002	0.975031	1.24145	13.1278	0.663388	NA	NA
CD3 on CD8+ T cell || id:ebi-a-GCST90001859	Inflammatory bowel disease	Weighted median	18	0.0270972	0.03865	0.483247	1.02747	0.952508	1.10833	NA	NA	NA	NA
CD3 on CD39+ CD4+ T cell || id:ebi-a-GCST90001860	Inflammatory bowel disease	Inverse variance weighted	17	0.00606514	0.0211089	0.773863	1.00608	0.965308	1.04858	15.137	0.514627	0.00621577	0.555087
CD3 on CD39+ CD4+ T cell || id:ebi-a-GCST90001860	Inflammatory bowel disease	MR Egger	17	-0.0121786	0.0368637	0.745692	0.987895	0.919035	1.06192	14.7726	0.467918	NA	NA
CD3 on CD39+ CD4+ T cell || id:ebi-a-GCST90001860	Inflammatory bowel disease	Weighted median	17	0.000836052	0.0260431	0.97439	1.00084	0.951031	1.05325	NA	NA	NA	NA
CD3 on CD28+ CD4+ T cell || id:ebi-a-GCST90001861	Inflammatory bowel disease	Inverse variance weighted	17	-5.86e-05	0.0259128	0.998195	0.999941	0.950423	1.05204	13.0895	0.666204	-0.00159299	0.894515
CD3 on CD28+ CD4+ T cell || id:ebi-a-GCST90001861	Inflammatory bowel disease	MR Egger	17	0.00581039	0.0506496	0.910191	1.00583	0.910772	1.1108	13.0713	0.596791	NA	NA
CD3 on CD28+ CD4+ T cell || id:ebi-a-GCST90001861	Inflammatory bowel disease	Weighted median	17	0.00551582	0.0344482	0.872787	1.00553	0.93988	1.07577	NA	NA	NA	NA
CD3 on CD28+ CD4-CD8- T cell || id:ebi-a-GCST90001862	Inflammatory bowel disease	Inverse variance weighted	8	-0.0733845	0.057392	0.201019	0.929243	0.830379	1.03988	8.49826	0.290712	-0.0378831	0.444849
CD3 on CD28+ CD4-CD8- T cell || id:ebi-a-GCST90001862	Inflammatory bowel disease	MR Egger	8	0.133152	0.259377	0.626052	1.14242	0.687134	1.89939	7.64642	0.265168	NA	NA
CD3 on CD28+ CD4-CD8- T cell || id:ebi-a-GCST90001862	Inflammatory bowel disease	Weighted median	8	-0.00764108	0.0738108	0.917548	0.992388	0.858722	1.14686	NA	NA	NA	NA
CD3 on CD28+ CD45RA- CD8+ T cell || id:ebi-a-GCST90001863	Inflammatory bowel disease	Inverse variance weighted	14	0.0362153	0.029438	0.218614	1.03688	0.978746	1.09847	8.47213	0.811541	-0.0063871	0.717631
CD3 on CD28+ CD45RA- CD8+ T cell || id:ebi-a-GCST90001863	Inflammatory bowel disease	MR Egger	14	0.0634145	0.0791362	0.438518	1.06547	0.912386	1.24424	8.33503	0.758432	NA	NA
CD3 on CD28+ CD45RA- CD8+ T cell || id:ebi-a-GCST90001863	Inflammatory bowel disease	Weighted median	14	0.0282487	0.041953	0.500731	1.02865	0.947452	1.11681	NA	NA	NA	NA
CD3 on CD28+ CD45RA+ CD8+ T cell || id:ebi-a-GCST90001864	Inflammatory bowel disease	Inverse variance weighted	18	-0.0143441	0.0212639	0.499947	0.985758	0.945519	1.02771	8.76292	0.947407	-0.00811194	0.452366
CD3 on CD28+ CD45RA+ CD8+ T cell || id:ebi-a-GCST90001864	Inflammatory bowel disease	MR Egger	18	0.0106298	0.0387733	0.787475	1.01069	0.936725	1.09049	8.16961	0.943656	NA	NA
CD3 on CD28+ CD45RA+ CD8+ T cell || id:ebi-a-GCST90001864	Inflammatory bowel disease	Weighted median	18	0.000894258	0.0264527	0.973032	1.00089	0.950323	1.05416	NA	NA	NA	NA
CD3 on CD28- CD8+ T cell || id:ebi-a-GCST90001865	Inflammatory bowel disease	Inverse variance weighted	16	0.0558194	0.0306635	0.0686998	1.05741	0.995728	1.12291	8.6468	0.895249	-0.00943868	0.625517
CD3 on CD28- CD8+ T cell || id:ebi-a-GCST90001865	Inflammatory bowel disease	MR Egger	16	0.107112	0.107264	0.334943	1.11306	0.902014	1.37348	8.39778	0.867591	NA	NA
CD3 on CD28- CD8+ T cell || id:ebi-a-GCST90001865	Inflammatory bowel disease	Weighted median	16	0.0509822	0.0418963	0.223655	1.0523	0.969345	1.14236	NA	NA	NA	NA
CD3 on CD39+ CD8+ T cell || id:ebi-a-GCST90001866	Inflammatory bowel disease	Inverse variance weighted	12	0.0328032	0.0297022	0.269418	1.03335	0.974907	1.09529	8.26911	0.689014	-0.00216889	0.91143
CD3 on CD39+ CD8+ T cell || id:ebi-a-GCST90001866	Inflammatory bowel disease	MR Egger	12	0.0416386	0.0829482	0.626547	1.04252	0.886087	1.22656	8.25609	0.603838	NA	NA
CD3 on CD39+ CD8+ T cell || id:ebi-a-GCST90001866	Inflammatory bowel disease	Weighted median	12	0.030001	0.0399985	0.453223	1.03046	0.952756	1.11449	NA	NA	NA	NA
CD3 on CD4+ T cell || id:ebi-a-GCST90001867	Inflammatory bowel disease	Inverse variance weighted	20	-0.0248399	0.034206	0.467726	0.975466	0.912211	1.04311	19.3969	0.431651	-0.000836132	0.959804
CD3 on CD4+ T cell || id:ebi-a-GCST90001867	Inflammatory bowel disease	MR Egger	20	-0.0200384	0.100308	0.843901	0.980161	0.805218	1.19311	19.3941	0.36794	NA	NA
CD3 on CD4+ T cell || id:ebi-a-GCST90001867	Inflammatory bowel disease	Weighted median	20	-0.0313347	0.050631	0.535993	0.969151	0.877594	1.07026	NA	NA	NA	NA
CD3 on CD4 regulatory T cell || id:ebi-a-GCST90001868	Inflammatory bowel disease	Inverse variance weighted	7	0.0110305	0.0231597	0.633876	1.01109	0.966221	1.05805	3.28051	0.772905	0.00653396	0.697207
CD3 on CD4 regulatory T cell || id:ebi-a-GCST90001868	Inflammatory bowel disease	MR Egger	7	-0.00383648	0.0428562	0.932144	0.996171	0.915912	1.08346	3.11053	0.68295	NA	NA
CD3 on CD4 regulatory T cell || id:ebi-a-GCST90001868	Inflammatory bowel disease	Weighted median	7	0.0035876	0.0260969	0.890657	1.00359	0.953551	1.05626	NA	NA	NA	NA
CD3 on resting CD4 regulatory T cell || id:ebi-a-GCST90001869	Inflammatory bowel disease	Inverse variance weighted	27	-0.055204	0.0280049	0.0486979	0.946292	0.89575	0.999686	29.4671	0.290274	-0.0201729	0.228804
CD3 on resting CD4 regulatory T cell || id:ebi-a-GCST90001869	Inflammatory bowel disease	MR Egger	27	0.0462118	0.0867578	0.598977	1.0473	0.883527	1.24142	27.7762	0.31826	NA	NA
CD3 on resting CD4 regulatory T cell || id:ebi-a-GCST90001869	Inflammatory bowel disease	Weighted median	27	-0.0302708	0.03897	0.437293	0.970183	0.898838	1.04719	NA	NA	NA	NA
CD34 on Hematopoietic Stem Cell || id:ebi-a-GCST90001870	Inflammatory bowel disease	Inverse variance weighted	9	0.0124304	0.0301888	0.680519	1.01251	0.954336	1.07423	2.69896	0.951807	-0.0278	0.50977
CD34 on Hematopoietic Stem Cell || id:ebi-a-GCST90001870	Inflammatory bowel disease	MR Egger	9	0.127629	0.168604	0.473768	1.13613	0.816413	1.58106	2.21666	0.946882	NA	NA
CD34 on Hematopoietic Stem Cell || id:ebi-a-GCST90001870	Inflammatory bowel disease	Weighted median	9	0.0118603	0.039653	0.764863	1.01193	0.936262	1.09372	NA	NA	NA	NA
HVEM on T cell || id:ebi-a-GCST90001871	Inflammatory bowel disease	Inverse variance weighted	19	-0.0651749	0.0354539	0.0660182	0.936904	0.874009	1.00432	48.5582	0.000124321	-0.0300724	0.366401
HVEM on T cell || id:ebi-a-GCST90001871	Inflammatory bowel disease	MR Egger	19	0.0534279	0.132669	0.692176	1.05488	0.813342	1.36815	46.2169	0.000160077	NA	NA
HVEM on T cell || id:ebi-a-GCST90001871	Inflammatory bowel disease	Weighted median	19	-0.0255941	0.0361643	0.47912	0.974731	0.908032	1.04633	NA	NA	NA	NA
HVEM on naive CD8+ T cell || id:ebi-a-GCST90001872	Inflammatory bowel disease	Inverse variance weighted	12	0.0330947	0.0543197	0.542353	1.03365	0.929255	1.14977	49.5525	7.53e-07	-0.0378338	0.449417
HVEM on naive CD8+ T cell || id:ebi-a-GCST90001872	Inflammatory bowel disease	MR Egger	12	0.177723	0.191862	0.3761	1.19449	0.820103	1.7398	46.6609	1.09e-06	NA	NA
HVEM on naive CD8+ T cell || id:ebi-a-GCST90001872	Inflammatory bowel disease	Weighted median	12	0.0867505	0.0374222	0.0204407	1.09062	1.01349	1.17363	NA	NA	NA	NA
HVEM on Effector Memory CD8+ T cell || id:ebi-a-GCST90001873	Inflammatory bowel disease	Inverse variance weighted	11	-0.0539146	0.05156	0.295715	0.947513	0.856439	1.04827	41.6962	8.49e-06	0.0138703	0.798876
HVEM on Effector Memory CD8+ T cell || id:ebi-a-GCST90001873	Inflammatory bowel disease	MR Egger	11	-0.102986	0.194649	0.609546	0.90214	0.616006	1.32118	41.3795	4.27e-06	NA	NA
HVEM on Effector Memory CD8+ T cell || id:ebi-a-GCST90001873	Inflammatory bowel disease	Weighted median	11	-0.00577817	0.0413174	0.88878	0.994238	0.916897	1.0781	NA	NA	NA	NA
HVEM on Terminally Differentiated CD8+ T cell || id:ebi-a-GCST90001874	Inflammatory bowel disease	Inverse variance weighted	21	-0.026698	0.0208328	0.200005	0.973655	0.934699	1.01423	24.4002	0.225346	-0.0305199	0.109345
HVEM on Terminally Differentiated CD8+ T cell || id:ebi-a-GCST90001874	Inflammatory bowel disease	MR Egger	21	0.0877748	0.0710012	0.231433	1.09174	0.94991	1.25475	21.2448	0.323436	NA	NA
HVEM on Terminally Differentiated CD8+ T cell || id:ebi-a-GCST90001874	Inflammatory bowel disease	Weighted median	21	0.015173	0.0266594	0.569259	1.01529	0.9636	1.06975	NA	NA	NA	NA
HVEM on CD4+ T cell || id:ebi-a-GCST90001875	Inflammatory bowel disease	Inverse variance weighted	13	-0.080141	0.0480703	0.0954817	0.922986	0.839995	1.01418	49.2083	1.92e-06	0.0248697	0.609395
HVEM on CD4+ T cell || id:ebi-a-GCST90001875	Inflammatory bowel disease	MR Egger	13	-0.171006	0.179754	0.361871	0.842817	0.592548	1.19879	48.0014	1.43e-06	NA	NA
HVEM on CD4+ T cell || id:ebi-a-GCST90001875	Inflammatory bowel disease	Weighted median	13	-0.00631296	0.0399584	0.874466	0.993707	0.918851	1.07466	NA	NA	NA	NA
HVEM on Central Memory CD4+ T cell || id:ebi-a-GCST90001876	Inflammatory bowel disease	Inverse variance weighted	9	-0.128663	0.0605917	0.0337167	0.87927	0.780811	0.990146	29.4552	0.000263741	-0.0261971	0.711297
HVEM on Central Memory CD4+ T cell || id:ebi-a-GCST90001876	Inflammatory bowel disease	MR Egger	9	-0.0257803	0.274454	0.927795	0.974549	0.569094	1.66887	28.8428	0.000154555	NA	NA
HVEM on Central Memory CD4+ T cell || id:ebi-a-GCST90001876	Inflammatory bowel disease	Weighted median	9	-0.0233933	0.0517999	0.651551	0.976878	0.882566	1.08127	NA	NA	NA	NA
HVEM on naive CD4+ T cell || id:ebi-a-GCST90001877	Inflammatory bowel disease	Inverse variance weighted	14	-0.0840346	0.0495998	0.090217	0.919399	0.834227	1.01327	52.116	1.29e-06	-0.163159	0.00444449
HVEM on naive CD4+ T cell || id:ebi-a-GCST90001877	Inflammatory bowel disease	MR Egger	14	0.488902	0.168037	0.0130936	1.63053	1.17298	2.26654	25.8467	0.0112826	NA	NA
HVEM on naive CD4+ T cell || id:ebi-a-GCST90001877	Inflammatory bowel disease	Weighted median	14	-0.0182779	0.0375112	0.626071	0.981888	0.912288	1.0568	NA	NA	NA	NA
HVEM on Effector Memory CD4+ T cell || id:ebi-a-GCST90001878	Inflammatory bowel disease	Inverse variance weighted	12	-0.0242553	0.0530137	0.64729	0.976036	0.879711	1.08291	46.1459	3.05e-06	0.0212699	0.698254
HVEM on Effector Memory CD4+ T cell || id:ebi-a-GCST90001878	Inflammatory bowel disease	MR Egger	12	-0.104395	0.20827	0.627047	0.90087	0.598934	1.35502	45.4226	1.82e-06	NA	NA
HVEM on Effector Memory CD4+ T cell || id:ebi-a-GCST90001878	Inflammatory bowel disease	Weighted median	12	0.0701827	0.0425002	0.0986675	1.0727	0.986968	1.16589	NA	NA	NA	NA
HVEM on Terminally Differentiated CD4+ T cell || id:ebi-a-GCST90001879	Inflammatory bowel disease	Inverse variance weighted	20	-0.0470445	0.0312675	0.132431	0.954045	0.897332	1.01434	43.5011	0.00110658	0.0101138	0.788147
HVEM on Terminally Differentiated CD4+ T cell || id:ebi-a-GCST90001879	Inflammatory bowel disease	MR Egger	20	-0.0907429	0.163387	0.585469	0.913252	0.662999	1.25797	43.322	0.000720484	NA	NA
HVEM on Terminally Differentiated CD4+ T cell || id:ebi-a-GCST90001879	Inflammatory bowel disease	Weighted median	20	-0.0221048	0.0316352	0.484714	0.978138	0.91933	1.04071	NA	NA	NA	NA
HVEM on CD45RA- CD4+ T cell || id:ebi-a-GCST90001880	Inflammatory bowel disease	Inverse variance weighted	12	-0.0893261	0.0566503	0.114842	0.914547	0.818435	1.02195	53.6037	1.39e-07	0.00736745	0.889277
HVEM on CD45RA- CD4+ T cell || id:ebi-a-GCST90001880	Inflammatory bowel disease	MR Egger	12	-0.11951	0.219532	0.598105	0.887355	0.57707	1.36448	53.4946	6.03e-08	NA	NA
HVEM on CD45RA- CD4+ T cell || id:ebi-a-GCST90001880	Inflammatory bowel disease	Weighted median	12	-0.00515275	0.047239	0.91314	0.994861	0.906884	1.09137	NA	NA	NA	NA
HVEM on CD8+ T cell || id:ebi-a-GCST90001881	Inflammatory bowel disease	Inverse variance weighted	10	-0.059738	0.0474375	0.207922	0.942011	0.858374	1.0338	25.2478	0.00270895	0.0132333	0.743633
HVEM on CD8+ T cell || id:ebi-a-GCST90001881	Inflammatory bowel disease	MR Egger	10	-0.1143	0.168709	0.517202	0.891991	0.640844	1.24156	24.8911	0.001622	NA	NA
HVEM on CD8+ T cell || id:ebi-a-GCST90001881	Inflammatory bowel disease	Weighted median	10	-0.00679025	0.0398788	0.864796	0.993233	0.918556	1.07398	NA	NA	NA	NA
HVEM on Central Memory CD8+ T cell || id:ebi-a-GCST90001882	Inflammatory bowel disease	Inverse variance weighted	16	-0.013253	0.0355482	0.709285	0.986834	0.920418	1.05804	39.1516	0.000608265	0.00534512	0.904428
HVEM on Central Memory CD8+ T cell || id:ebi-a-GCST90001882	Inflammatory bowel disease	MR Egger	16	-0.032506	0.16171	0.843578	0.968017	0.705071	1.32902	39.1098	0.000350748	NA	NA
HVEM on Central Memory CD8+ T cell || id:ebi-a-GCST90001882	Inflammatory bowel disease	Weighted median	16	0.00681156	0.0309994	0.82608	1.00683	0.947482	1.06991	NA	NA	NA	NA
CD16-CD56 on Natural Killer T || id:ebi-a-GCST90001883	Inflammatory bowel disease	Inverse variance weighted	20	0.0259269	0.0350672	0.459695	1.02627	0.958098	1.09928	30.0746	0.0508564	-0.0137757	0.428445
CD16-CD56 on Natural Killer T || id:ebi-a-GCST90001883	Inflammatory bowel disease	MR Egger	20	0.0832285	0.0790902	0.306574	1.08679	0.930728	1.26902	29.0166	0.0481763	NA	NA
CD16-CD56 on Natural Killer T || id:ebi-a-GCST90001883	Inflammatory bowel disease	Weighted median	20	0.0229519	0.0420226	0.584942	1.02322	0.942318	1.11106	NA	NA	NA	NA
CD16-CD56 on Natural Killer || id:ebi-a-GCST90001884	Inflammatory bowel disease	Inverse variance weighted	15	-0.0616642	0.0564415	0.274598	0.940199	0.841735	1.05018	65.0026	1.53e-08	-0.0755405	0.0130328
CD16-CD56 on Natural Killer || id:ebi-a-GCST90001884	Inflammatory bowel disease	MR Egger	15	0.16915	0.092443	0.0903014	1.1843	0.988034	1.41955	39.7436	0.000152001	NA	NA
CD16-CD56 on Natural Killer || id:ebi-a-GCST90001884	Inflammatory bowel disease	Weighted median	15	0.0102065	0.0390772	0.793947	1.01026	0.935771	1.09068	NA	NA	NA	NA
CD16-CD56 on HLA DR+ Natural Killer || id:ebi-a-GCST90001885	Inflammatory bowel disease	Inverse variance weighted	16	0.0976992	0.0486645	0.0446848	1.10263	1.00232	1.21298	27.5079	0.0248608	-0.0172394	0.553902
CD16-CD56 on HLA DR+ Natural Killer || id:ebi-a-GCST90001885	Inflammatory bowel disease	MR Egger	16	0.204151	0.182431	0.281947	1.22648	0.857776	1.75368	26.8036	0.0204166	NA	NA
CD16-CD56 on HLA DR+ Natural Killer || id:ebi-a-GCST90001885	Inflammatory bowel disease	Weighted median	16	0.0745593	0.0552832	0.17744	1.07741	0.966769	1.20071	NA	NA	NA	NA
CD28 on CD39+ activated CD4 regulatory T cell || id:ebi-a-GCST90001886	Inflammatory bowel disease	Inverse variance weighted	8	-0.111169	0.0717193	0.121128	0.894788	0.777448	1.02984	26.1145	0.000480476	0.0241283	0.593411
CD28 on CD39+ activated CD4 regulatory T cell || id:ebi-a-GCST90001886	Inflammatory bowel disease	MR Egger	8	-0.224235	0.214328	0.335764	0.799128	0.525021	1.21634	24.8013	0.000371627	NA	NA
CD28 on CD39+ activated CD4 regulatory T cell || id:ebi-a-GCST90001886	Inflammatory bowel disease	Weighted median	8	-0.0986219	0.0598648	0.0994736	0.906085	0.80577	1.01889	NA	NA	NA	NA
CD28 on secreting CD4 regulatory T cell || id:ebi-a-GCST90001887	Inflammatory bowel disease	Inverse variance weighted	9	-0.0863537	0.0511512	0.0913721	0.91727	0.829767	1.014	17.9624	0.0215102	-0.00371091	0.89818
CD28 on secreting CD4 regulatory T cell || id:ebi-a-GCST90001887	Inflammatory bowel disease	MR Egger	9	-0.0711348	0.127042	0.592985	0.931336	0.726049	1.19467	17.9173	0.0123486	NA	NA
CD28 on secreting CD4 regulatory T cell || id:ebi-a-GCST90001887	Inflammatory bowel disease	Weighted median	9	-0.0959217	0.0476415	0.0440716	0.908535	0.827539	0.997459	NA	NA	NA	NA
CD28 on CD39+ secreting CD4 regulatory T cell || id:ebi-a-GCST90001888	Inflammatory bowel disease	Inverse variance weighted	15	-0.0179876	0.0313228	0.565787	0.982173	0.923689	1.04436	16.6549	0.275036	-0.0192963	0.166012
CD28 on CD39+ secreting CD4 regulatory T cell || id:ebi-a-GCST90001888	Inflammatory bowel disease	MR Egger	15	0.0652947	0.0642425	0.327992	1.06747	0.94118	1.21071	14.2879	0.353882	NA	NA
CD28 on CD39+ secreting CD4 regulatory T cell || id:ebi-a-GCST90001888	Inflammatory bowel disease	Weighted median	15	-0.0143784	0.0352552	0.683394	0.985725	0.919911	1.05625	NA	NA	NA	NA
CD28 on activated & secreting CD4 regulatory T cell || id:ebi-a-GCST90001889	Inflammatory bowel disease	Inverse variance weighted	15	-0.0661802	0.0333191	0.0470052	0.935962	0.876792	0.999126	14.402	0.420212	0.0205922	0.197121
CD28 on activated & secreting CD4 regulatory T cell || id:ebi-a-GCST90001889	Inflammatory bowel disease	MR Egger	15	-0.158589	0.0754977	0.0557531	0.853347	0.735971	0.989442	12.5539	0.482829	NA	NA
CD28 on activated & secreting CD4 regulatory T cell || id:ebi-a-GCST90001889	Inflammatory bowel disease	Weighted median	15	-0.119674	0.0456271	0.00871911	0.887209	0.811311	0.970208	NA	NA	NA	NA
CD28 on CD45RA+ CD4+ T cell || id:ebi-a-GCST90001890	Inflammatory bowel disease	Inverse variance weighted	9	-0.0710777	0.047524	0.134754	0.93139	0.848551	1.02231	17.6274	0.0242	0.033709	0.192094
CD28 on CD45RA+ CD4+ T cell || id:ebi-a-GCST90001890	Inflammatory bowel disease	MR Egger	9	-0.199824	0.0997189	0.0851314	0.818875	0.673496	0.995634	13.5838	0.0590983	NA	NA
CD28 on CD45RA+ CD4+ T cell || id:ebi-a-GCST90001890	Inflammatory bowel disease	Weighted median	9	-0.126935	0.0429163	0.00309907	0.880791	0.809733	0.958085	NA	NA	NA	NA
CD28 on CD45RA- CD4 not regulatory T cell || id:ebi-a-GCST90001891	Inflammatory bowel disease	Inverse variance weighted	12	-0.0418351	0.0559757	0.454834	0.959028	0.859377	1.07023	40.0288	3.54e-05	0.00303629	0.911219
CD28 on CD45RA- CD4 not regulatory T cell || id:ebi-a-GCST90001891	Inflammatory bowel disease	MR Egger	12	-0.0542492	0.123396	0.669551	0.947196	0.743708	1.20636	39.9765	1.71e-05	NA	NA
CD28 on CD45RA- CD4 not regulatory T cell || id:ebi-a-GCST90001891	Inflammatory bowel disease	Weighted median	12	-0.0516988	0.0427809	0.226873	0.949615	0.873236	1.03267	NA	NA	NA	NA
CD28 on CD39+ CD4+ T cell || id:ebi-a-GCST90001892	Inflammatory bowel disease	Inverse variance weighted	11	-0.0239426	0.0330884	0.469314	0.976342	0.915032	1.04176	20.0506	0.028778	0.013071	0.521316
CD28 on CD39+ CD4+ T cell || id:ebi-a-GCST90001892	Inflammatory bowel disease	MR Egger	11	-0.0632628	0.0680524	0.376829	0.938697	0.821482	1.07264	19.1053	0.0243124	NA	NA
CD28 on CD39+ CD4+ T cell || id:ebi-a-GCST90001892	Inflammatory bowel disease	Weighted median	11	-0.0167592	0.0291901	0.565874	0.98338	0.928698	1.04128	NA	NA	NA	NA
CD28 on CD28+ CD45RA- CD8+ T cell || id:ebi-a-GCST90001893	Inflammatory bowel disease	Inverse variance weighted	12	-0.099928	0.0486934	0.0401516	0.904903	0.822533	0.995521	26.5793	0.00531688	0.00810147	0.703656
CD28 on CD28+ CD45RA- CD8+ T cell || id:ebi-a-GCST90001893	Inflammatory bowel disease	MR Egger	12	-0.136315	0.105869	0.22689	0.872567	0.709057	1.07378	26.1781	0.00350787	NA	NA
CD28 on CD28+ CD45RA- CD8+ T cell || id:ebi-a-GCST90001893	Inflammatory bowel disease	Weighted median	12	-0.10167	0.0399658	0.0109611	0.903327	0.835267	0.976933	NA	NA	NA	NA
CD28 on CD28+ CD4+ T cell || id:ebi-a-GCST90001894	Inflammatory bowel disease	Inverse variance weighted	21	-0.0580994	0.0375675	0.121975	0.943556	0.876576	1.01565	37.2917	0.0107941	0.041164	0.0475216
CD28 on CD28+ CD4+ T cell || id:ebi-a-GCST90001894	Inflammatory bowel disease	MR Egger	21	-0.234025	0.0899815	0.0175548	0.791342	0.663392	0.94397	30.1652	0.0497335	NA	NA
CD28 on CD28+ CD4+ T cell || id:ebi-a-GCST90001894	Inflammatory bowel disease	Weighted median	21	-0.107895	0.0433082	0.0127265	0.897722	0.824664	0.977252	NA	NA	NA	NA
CD28 on CD28+ CD4-CD8- T cell || id:ebi-a-GCST90001895	Inflammatory bowel disease	Inverse variance weighted	3	0.0276948	0.0968408	0.774891	1.02808	0.850345	1.24297	1.04531	0.592946	0.0526564	0.544476
CD28 on CD28+ CD4-CD8- T cell || id:ebi-a-GCST90001895	Inflammatory bowel disease	MR Egger	3	-0.31661	0.407782	0.579706	0.728615	0.327633	1.62035	0.289796	0.590352	NA	NA
CD28 on CD28+ CD4-CD8- T cell || id:ebi-a-GCST90001895	Inflammatory bowel disease	Weighted median	3	0.0569473	0.114865	0.620054	1.0586	0.845194	1.32589	NA	NA	NA	NA
CD28 on CD28+ CD45RA+ CD8+ T cell || id:ebi-a-GCST90001896	Inflammatory bowel disease	Inverse variance weighted	12	-0.0884421	0.0329343	0.00724403	0.915356	0.858136	0.976392	13.9422	0.236208	0.00992786	0.590854
CD28 on CD28+ CD45RA+ CD8+ T cell || id:ebi-a-GCST90001896	Inflammatory bowel disease	MR Egger	12	-0.118766	0.0643334	0.0946483	0.888016	0.782815	1.00735	13.5251	0.195778	NA	NA
CD28 on CD28+ CD45RA+ CD8+ T cell || id:ebi-a-GCST90001896	Inflammatory bowel disease	Weighted median	12	-0.102514	0.036967	0.00555237	0.902566	0.839483	0.970389	NA	NA	NA	NA
CD28 on CD39+ CD8+ T cell || id:ebi-a-GCST90001897	Inflammatory bowel disease	Inverse variance weighted	10	-0.0756648	0.0516954	0.143286	0.927127	0.83779	1.02599	14.6591	0.100735	0.00294856	0.934982
CD28 on CD39+ CD8+ T cell || id:ebi-a-GCST90001897	Inflammatory bowel disease	MR Egger	10	-0.0928821	0.211745	0.67252	0.911301	0.601756	1.38008	14.6461	0.0664025	NA	NA
CD28 on CD39+ CD8+ T cell || id:ebi-a-GCST90001897	Inflammatory bowel disease	Weighted median	10	-0.0312843	0.0602192	0.603407	0.9692	0.861299	1.09062	NA	NA	NA	NA
CD28 on CD4+ T cell || id:ebi-a-GCST90001898	Inflammatory bowel disease	Inverse variance weighted	19	-0.064455	0.0348029	0.0640257	0.937578	0.875755	1.00377	29.492	0.0426884	0.0241328	0.163917
CD28 on CD4+ T cell || id:ebi-a-GCST90001898	Inflammatory bowel disease	MR Egger	19	-0.182608	0.0879529	0.0533573	0.833095	0.701176	0.989832	26.2265	0.0704324	NA	NA
CD28 on CD4+ T cell || id:ebi-a-GCST90001898	Inflammatory bowel disease	Weighted median	19	-0.0967423	0.0437194	0.0269114	0.90779	0.833241	0.989009	NA	NA	NA	NA
CD28 on CD4 regulatory T cell || id:ebi-a-GCST90001899	Inflammatory bowel disease	Inverse variance weighted	14	-0.0556768	0.0406924	0.171239	0.945845	0.873337	1.02437	18.4386	0.141564	0.0295236	0.13663
CD28 on CD4 regulatory T cell || id:ebi-a-GCST90001899	Inflammatory bowel disease	MR Egger	14	-0.195624	0.0957898	0.0637404	0.822321	0.681559	0.992155	15.2124	0.230027	NA	NA
CD28 on CD4 regulatory T cell || id:ebi-a-GCST90001899	Inflammatory bowel disease	Weighted median	14	-0.102681	0.0493773	0.0375691	0.902414	0.819172	0.994116	NA	NA	NA	NA
CD28 on resting CD4 regulatory T cell || id:ebi-a-GCST90001900	Inflammatory bowel disease	Inverse variance weighted	5	-0.0853398	0.0359748	0.017682	0.9182	0.855687	0.98528	1.29738	0.861819	0.0153075	0.455594
CD28 on resting CD4 regulatory T cell || id:ebi-a-GCST90001900	Inflammatory bowel disease	MR Egger	5	-0.131704	0.0650968	0.136234	0.8766	0.771596	0.995894	0.567062	0.90393	NA	NA
CD28 on resting CD4 regulatory T cell || id:ebi-a-GCST90001900	Inflammatory bowel disease	Weighted median	5	-0.0971484	0.0399286	0.0149721	0.907421	0.839114	0.981289	NA	NA	NA	NA
CD28 on CD39+ resting CD4 regulatory T cell || id:ebi-a-GCST90001901	Inflammatory bowel disease	Inverse variance weighted	12	-0.0624779	0.0698024	0.370751	0.939434	0.819312	1.07717	37.8276	8.37e-05	-0.0532511	0.138793
CD28 on CD39+ resting CD4 regulatory T cell || id:ebi-a-GCST90001901	Inflammatory bowel disease	MR Egger	12	0.203535	0.177782	0.27893	1.22573	0.865093	1.7367	30.0518	0.000840079	NA	NA
CD28 on CD39+ resting CD4 regulatory T cell || id:ebi-a-GCST90001901	Inflammatory bowel disease	Weighted median	12	0.0459732	0.0601411	0.444615	1.04705	0.930621	1.17804	NA	NA	NA	NA
CD28 on activated CD4 regulatory T cell || id:ebi-a-GCST90001902	Inflammatory bowel disease	Inverse variance weighted	11	-0.0695831	0.0376335	0.0644627	0.932783	0.866455	1.00419	7.37813	0.68933	0.021197	0.198809
CD28 on activated CD4 regulatory T cell || id:ebi-a-GCST90001902	Inflammatory bowel disease	MR Egger	11	-0.187386	0.092894	0.074458	0.829124	0.691109	0.994701	5.45418	0.793056	NA	NA
CD28 on activated CD4 regulatory T cell || id:ebi-a-GCST90001902	Inflammatory bowel disease	Weighted median	11	-0.0858879	0.0505661	0.0894087	0.917697	0.831106	1.01331	NA	NA	NA	NA
CD86 on myeloid Dendritic Cell || id:ebi-a-GCST90001903	Inflammatory bowel disease	Inverse variance weighted	15	-0.000941728	0.0324193	0.976826	0.999059	0.937552	1.0646	10.9892	0.686886	0.0214567	0.147451
CD86 on myeloid Dendritic Cell || id:ebi-a-GCST90001903	Inflammatory bowel disease	MR Egger	15	-0.100441	0.0722734	0.18795	0.904438	0.78498	1.04208	8.61643	0.801257	NA	NA
CD86 on myeloid Dendritic Cell || id:ebi-a-GCST90001903	Inflammatory bowel disease	Weighted median	15	-0.0132423	0.0452571	0.769826	0.986845	0.903078	1.07838	NA	NA	NA	NA
CD86 on CD62L+ myeloid Dendritic Cell || id:ebi-a-GCST90001904	Inflammatory bowel disease	Inverse variance weighted	13	-0.00148787	0.0350689	0.966158	0.998513	0.932186	1.06956	7.08778	0.851758	0.0142038	0.499527
CD86 on CD62L+ myeloid Dendritic Cell || id:ebi-a-GCST90001904	Inflammatory bowel disease	MR Egger	13	-0.0783679	0.115557	0.511673	0.924624	0.737228	1.15966	6.60025	0.830471	NA	NA
CD86 on CD62L+ myeloid Dendritic Cell || id:ebi-a-GCST90001904	Inflammatory bowel disease	Weighted median	13	-0.0447981	0.0482913	0.353582	0.95619	0.869837	1.05112	NA	NA	NA	NA
CD86 on monocyte || id:ebi-a-GCST90001905	Inflammatory bowel disease	Inverse variance weighted	9	0.0140981	0.0815102	0.862682	1.0142	0.86445	1.18989	20.0983	0.00997032	0.00757077	0.89103
CD86 on monocyte || id:ebi-a-GCST90001905	Inflammatory bowel disease	MR Egger	9	-0.029182	0.316831	0.929194	0.97124	0.521957	1.80725	20.0406	0.00548274	NA	NA
CD86 on monocyte || id:ebi-a-GCST90001905	Inflammatory bowel disease	Weighted median	9	-0.0198655	0.080399	0.804841	0.98033	0.837405	1.14765	NA	NA	NA	NA
CD86 on granulocyte || id:ebi-a-GCST90001906	Inflammatory bowel disease	Inverse variance weighted	13	-0.0463998	0.0429511	0.280011	0.95466	0.877583	1.03851	17.6668	0.126189	0.016551	0.58232
CD86 on granulocyte || id:ebi-a-GCST90001906	Inflammatory bowel disease	MR Egger	13	-0.139979	0.170959	0.430288	0.869376	0.621849	1.21543	17.1657	0.103069	NA	NA
CD86 on granulocyte || id:ebi-a-GCST90001906	Inflammatory bowel disease	Weighted median	13	-0.0253103	0.0519016	0.625791	0.975007	0.880701	1.07941	NA	NA	NA	NA
CCR7 on naive CD4+ T cell || id:ebi-a-GCST90001907	Inflammatory bowel disease	Inverse variance weighted	14	-0.0179537	0.0363779	0.621635	0.982206	0.914613	1.0548	16.4509	0.225638	-0.00670091	0.78282
CCR7 on naive CD4+ T cell || id:ebi-a-GCST90001907	Inflammatory bowel disease	MR Egger	14	0.0142532	0.120319	0.907662	1.01436	0.801258	1.28413	16.3426	0.176042	NA	NA
CCR7 on naive CD4+ T cell || id:ebi-a-GCST90001907	Inflammatory bowel disease	Weighted median	14	-0.0558071	0.0434694	0.199203	0.945722	0.868483	1.02983	NA	NA	NA	NA
CCR7 on naive CD8+ T cell || id:ebi-a-GCST90001908	Inflammatory bowel disease	Inverse variance weighted	13	0.0168947	0.0353542	0.632743	1.01704	0.94895	1.09001	8.5467	0.741083	-0.0231018	0.287261
CCR7 on naive CD8+ T cell || id:ebi-a-GCST90001908	Inflammatory bowel disease	MR Egger	13	0.143238	0.118379	0.251642	1.154	0.915042	1.45537	7.29607	0.774625	NA	NA
CCR7 on naive CD8+ T cell || id:ebi-a-GCST90001908	Inflammatory bowel disease	Weighted median	13	0.0228937	0.0491526	0.641382	1.02316	0.929187	1.12663	NA	NA	NA	NA
CD45 on CD14+ monocyte || id:ebi-a-GCST90001909	Inflammatory bowel disease	Inverse variance weighted	11	-0.0400864	0.0487507	0.410921	0.960706	0.873159	1.05703	6.92151	0.732833	-0.0196607	0.434082
CD45 on CD14+ monocyte || id:ebi-a-GCST90001909	Inflammatory bowel disease	MR Egger	11	0.0782775	0.152568	0.620261	1.08142	0.801912	1.45836	6.25119	0.714539	NA	NA
CD45 on CD14+ monocyte || id:ebi-a-GCST90001909	Inflammatory bowel disease	Weighted median	11	0.00356253	0.0642471	0.95578	1.00357	0.884828	1.13824	NA	NA	NA	NA
CD45 on B cell || id:ebi-a-GCST90001910	Inflammatory bowel disease	Inverse variance weighted	10	0.177509	0.127885	0.165128	1.19424	0.929465	1.53444	75.4349	1.3e-12	-0.121929	0.310723
CD45 on B cell || id:ebi-a-GCST90001910	Inflammatory bowel disease	MR Egger	10	0.943913	0.719466	0.225926	2.57002	0.627356	10.5283	65.8027	3.35e-11	NA	NA
CD45 on B cell || id:ebi-a-GCST90001910	Inflammatory bowel disease	Weighted median	10	0.0371538	0.070409	0.597717	1.03785	0.904071	1.19143	NA	NA	NA	NA
CD45 on Natural Killer || id:ebi-a-GCST90001911	Inflammatory bowel disease	Inverse variance weighted	21	0.0260035	0.0500746	0.603556	1.02634	0.930398	1.13219	45.1656	0.0010478	0.000183781	0.995588
CD45 on Natural Killer || id:ebi-a-GCST90001911	Inflammatory bowel disease	MR Egger	21	0.0249171	0.200573	0.902438	1.02523	0.691974	1.51898	45.1656	0.000649744	NA	NA
CD45 on Natural Killer || id:ebi-a-GCST90001911	Inflammatory bowel disease	Weighted median	21	0.0491306	0.0579498	0.396542	1.05036	0.937582	1.1767	NA	NA	NA	NA
CD45 on HLA DR+ Natural Killer || id:ebi-a-GCST90001912	Inflammatory bowel disease	Inverse variance weighted	10	0.0374588	0.0462144	0.417628	1.03817	0.948265	1.1366	8.68956	0.466409	0.0166528	0.585281
CD45 on HLA DR+ Natural Killer || id:ebi-a-GCST90001912	Inflammatory bowel disease	MR Egger	10	-0.0579846	0.174394	0.748063	0.943664	0.670456	1.3282	8.35212	0.399851	NA	NA
CD45 on HLA DR+ Natural Killer || id:ebi-a-GCST90001912	Inflammatory bowel disease	Weighted median	10	0.0169291	0.0610737	0.781634	1.01707	0.90233	1.14641	NA	NA	NA	NA
CD45 on granulocyte || id:ebi-a-GCST90001913	Inflammatory bowel disease	Inverse variance weighted	8	0.0977737	0.109673	0.372661	1.10271	0.88942	1.36716	40.2039	1.15e-06	0.105205	0.252412
CD45 on granulocyte || id:ebi-a-GCST90001913	Inflammatory bowel disease	MR Egger	8	-0.518352	0.49788	0.337943	0.595501	0.224429	1.58011	31.7274	1.84e-05	NA	NA
CD45 on granulocyte || id:ebi-a-GCST90001913	Inflammatory bowel disease	Weighted median	8	0.00190673	0.070819	0.97852	1.00191	0.872059	1.15109	NA	NA	NA	NA
CD45 on lymphocyte || id:ebi-a-GCST90001914	Inflammatory bowel disease	Inverse variance weighted	17	-0.066262	0.0513252	0.196695	0.935886	0.846319	1.03493	35.1457	0.00379582	-0.0271649	0.284514
CD45 on lymphocyte || id:ebi-a-GCST90001914	Inflammatory bowel disease	MR Egger	17	0.0881124	0.148128	0.560817	1.09211	0.816917	1.46001	32.4783	0.00553852	NA	NA
CD45 on lymphocyte || id:ebi-a-GCST90001914	Inflammatory bowel disease	Weighted median	17	0.0277169	0.051506	0.590488	1.0281	0.929383	1.13731	NA	NA	NA	NA
CD45 on T cell || id:ebi-a-GCST90001915	Inflammatory bowel disease	Inverse variance weighted	8	-0.0704735	0.0726882	0.33228	0.931952	0.808203	1.07465	12.7164	0.0793275	-0.0395802	0.412797
CD45 on T cell || id:ebi-a-GCST90001915	Inflammatory bowel disease	MR Egger	8	0.155262	0.266994	0.582063	1.16796	0.692085	1.97106	11.2632	0.0805738	NA	NA
CD45 on T cell || id:ebi-a-GCST90001915	Inflammatory bowel disease	Weighted median	8	-0.0991117	0.0831602	0.233333	0.905642	0.76943	1.06597	NA	NA	NA	NA
CD45 on CD4+ T cell || id:ebi-a-GCST90001916	Inflammatory bowel disease	Inverse variance weighted	8	-0.064509	0.059638	0.279396	0.937528	0.834102	1.05378	9.03908	0.249862	-0.0129263	0.846967
CD45 on CD4+ T cell || id:ebi-a-GCST90001916	Inflammatory bowel disease	MR Egger	8	0.0283969	0.465525	0.95334	1.0288	0.413114	2.56209	8.97833	0.174801	NA	NA
CD45 on CD4+ T cell || id:ebi-a-GCST90001916	Inflammatory bowel disease	Weighted median	8	-0.0959727	0.0704466	0.173088	0.908489	0.791324	1.043	NA	NA	NA	NA
CD45 on CD8+ T cell || id:ebi-a-GCST90001917	Inflammatory bowel disease	Inverse variance weighted	8	0.0525697	0.0545522	0.335217	1.05398	0.947098	1.17291	8.42009	0.297011	0.00693869	0.854082
CD45 on CD8+ T cell || id:ebi-a-GCST90001917	Inflammatory bowel disease	MR Egger	8	0.0055668	0.251767	0.983077	1.00558	0.613916	1.64712	8.36868	0.212318	NA	NA
CD45 on CD8+ T cell || id:ebi-a-GCST90001917	Inflammatory bowel disease	Weighted median	8	0.0651028	0.0708837	0.358386	1.06727	0.92883	1.22634	NA	NA	NA	NA
CD45 on HLA DR+ T cell || id:ebi-a-GCST90001918	Inflammatory bowel disease	Inverse variance weighted	12	0.0209922	0.0540523	0.697743	1.02121	0.918558	1.13534	22.3159	0.022037	-0.0345547	0.370307
CD45 on HLA DR+ T cell || id:ebi-a-GCST90001918	Inflammatory bowel disease	MR Egger	12	0.171176	0.169071	0.335191	1.1867	0.851971	1.65294	20.5109	0.024774	NA	NA
CD45 on HLA DR+ T cell || id:ebi-a-GCST90001918	Inflammatory bowel disease	Weighted median	12	0.0320372	0.0597295	0.591702	1.03256	0.918482	1.1608	NA	NA	NA	NA
CD45 on Natural Killer T || id:ebi-a-GCST90001919	Inflammatory bowel disease	Inverse variance weighted	11	-0.035582	0.0552372	0.519467	0.965044	0.86602	1.07539	16.4137	0.0883854	-0.019501	0.621227
CD45 on Natural Killer T || id:ebi-a-GCST90001919	Inflammatory bowel disease	MR Egger	11	0.0650607	0.204913	0.758104	1.06722	0.714217	1.59471	15.9498	0.0679365	NA	NA
CD45 on Natural Killer T || id:ebi-a-GCST90001919	Inflammatory bowel disease	Weighted median	11	-0.0264309	0.0637915	0.678631	0.973915	0.85945	1.10363	NA	NA	NA	NA
CD45 on HLA DR+ CD4+ T cell || id:ebi-a-GCST90001920	Inflammatory bowel disease	Inverse variance weighted	11	0.197645	0.104328	0.058165	1.21853	0.993185	1.495	67.7101	1.22e-10	0.0502744	0.465471
CD45 on HLA DR+ CD4+ T cell || id:ebi-a-GCST90001920	Inflammatory bowel disease	MR Egger	11	-0.0956934	0.399366	0.815998	0.908743	0.415426	1.98787	63.6049	2.69e-10	NA	NA
CD45 on HLA DR+ CD4+ T cell || id:ebi-a-GCST90001920	Inflammatory bowel disease	Weighted median	11	0.0781042	0.0636115	0.219511	1.08124	0.954494	1.22481	NA	NA	NA	NA
CD45 on HLA DR+ CD8+ T cell || id:ebi-a-GCST90001921	Inflammatory bowel disease	Inverse variance weighted	11	-0.0248563	0.0511845	0.627235	0.97545	0.88234	1.07839	16.5992	0.083717	0.00807838	0.800203
CD45 on HLA DR+ CD8+ T cell || id:ebi-a-GCST90001921	Inflammatory bowel disease	MR Egger	11	-0.0727804	0.191537	0.712771	0.929805	0.638782	1.35342	16.4748	0.0576048	NA	NA
CD45 on HLA DR+ CD8+ T cell || id:ebi-a-GCST90001921	Inflammatory bowel disease	Weighted median	11	0.00877307	0.0554453	0.874276	1.00881	0.904928	1.12462	NA	NA	NA	NA
CD127 on T cell || id:ebi-a-GCST90001922	Inflammatory bowel disease	Inverse variance weighted	17	-0.0345916	0.0454628	0.446731	0.966	0.883646	1.05603	27.3574	0.0376781	0.0123211	0.641977
CD127 on T cell || id:ebi-a-GCST90001922	Inflammatory bowel disease	MR Egger	17	-0.100552	0.146614	0.503287	0.904338	0.678469	1.2054	26.9528	0.0291234	NA	NA
CD127 on T cell || id:ebi-a-GCST90001922	Inflammatory bowel disease	Weighted median	17	-0.0265296	0.0503537	0.598287	0.973819	0.8823	1.07483	NA	NA	NA	NA
CD127 on CD45RA- CD4 not regulatory T cell || id:ebi-a-GCST90001923	Inflammatory bowel disease	Inverse variance weighted	12	-0.0196679	0.0403031	0.62555	0.980524	0.906049	1.06112	6.39848	0.845498	-0.0219709	0.380455
CD127 on CD45RA- CD4 not regulatory T cell || id:ebi-a-GCST90001923	Inflammatory bowel disease	MR Egger	12	0.11372	0.150858	0.468336	1.12044	0.833633	1.50592	5.5566	0.85104	NA	NA
CD127 on CD45RA- CD4 not regulatory T cell || id:ebi-a-GCST90001923	Inflammatory bowel disease	Weighted median	12	-0.00665751	0.0556062	0.9047	0.993365	0.890791	1.10775	NA	NA	NA	NA
CD127 on CD28+ CD4+ T cell || id:ebi-a-GCST90001924	Inflammatory bowel disease	Inverse variance weighted	16	-0.00664972	0.0314439	0.832514	0.993372	0.933999	1.05652	13.768	0.543193	-0.00589019	0.745917
CD127 on CD28+ CD4+ T cell || id:ebi-a-GCST90001924	Inflammatory bowel disease	MR Egger	16	0.0244584	0.0992382	0.808902	1.02476	0.843624	1.24479	13.6588	0.475431	NA	NA
CD127 on CD28+ CD4+ T cell || id:ebi-a-GCST90001924	Inflammatory bowel disease	Weighted median	16	0.00494676	0.0463254	0.914961	1.00496	0.917731	1.10048	NA	NA	NA	NA
CD127 on CD28+ CD4-CD8- T cell || id:ebi-a-GCST90001925	Inflammatory bowel disease	Inverse variance weighted	16	-0.046548	0.0392648	0.235825	0.954519	0.883815	1.03088	13.273	0.581223	0.0101681	0.656787
CD127 on CD28+ CD4-CD8- T cell || id:ebi-a-GCST90001925	Inflammatory bowel disease	MR Egger	16	-0.105607	0.135883	0.449979	0.899778	0.689397	1.17436	13.0669	0.521266	NA	NA
CD127 on CD28+ CD4-CD8- T cell || id:ebi-a-GCST90001925	Inflammatory bowel disease	Weighted median	16	-0.0220391	0.0556645	0.692159	0.978202	0.877094	1.09097	NA	NA	NA	NA
CD127 on granulocyte || id:ebi-a-GCST90001926	Inflammatory bowel disease	Inverse variance weighted	20	-0.0555811	0.0363158	0.125894	0.945935	0.880945	1.01572	27.9205	0.0849705	0.0343627	0.102181
CD127 on granulocyte || id:ebi-a-GCST90001926	Inflammatory bowel disease	MR Egger	20	-0.24547	0.115555	0.0477601	0.782337	0.62378	0.981197	23.9709	0.155984	NA	NA
CD127 on granulocyte || id:ebi-a-GCST90001926	Inflammatory bowel disease	Weighted median	20	-0.0254874	0.0459422	0.579052	0.974835	0.89089	1.06669	NA	NA	NA	NA
CD127 on CD8+ T cell || id:ebi-a-GCST90001927	Inflammatory bowel disease	Inverse variance weighted	20	-0.0465456	0.0306479	0.128833	0.954521	0.898871	1.01362	14.9592	0.725189	0.00975846	0.571883
CD127 on CD8+ T cell || id:ebi-a-GCST90001927	Inflammatory bowel disease	MR Egger	20	-0.103164	0.102997	0.3298	0.901979	0.737095	1.10375	14.6276	0.687357	NA	NA
CD127 on CD8+ T cell || id:ebi-a-GCST90001927	Inflammatory bowel disease	Weighted median	20	-0.0698017	0.042646	0.101679	0.932579	0.857797	1.01388	NA	NA	NA	NA
CD127 on CD28+ CD45RA- CD8+ T cell || id:ebi-a-GCST90001928	Inflammatory bowel disease	Inverse variance weighted	11	-0.0260117	0.0479848	0.587762	0.974324	0.886866	1.07041	12.6522	0.243774	0.0228532	0.493722
CD127 on CD28+ CD45RA- CD8+ T cell || id:ebi-a-GCST90001928	Inflammatory bowel disease	MR Egger	11	-0.129462	0.153146	0.419819	0.878568	0.650751	1.18614	11.9751	0.214715	NA	NA
CD127 on CD28+ CD45RA- CD8+ T cell || id:ebi-a-GCST90001928	Inflammatory bowel disease	Weighted median	11	0.00667133	0.0569745	0.906786	1.00669	0.900326	1.12563	NA	NA	NA	NA
CD127 on CD28+ CD45RA+ CD8+ T cell || id:ebi-a-GCST90001929	Inflammatory bowel disease	Inverse variance weighted	14	0.0367579	0.0589832	0.533158	1.03744	0.924179	1.16459	38.6954	0.000223593	-0.0674022	0.049639
CD127 on CD28+ CD45RA+ CD8+ T cell || id:ebi-a-GCST90001929	Inflammatory bowel disease	MR Egger	14	0.370082	0.161292	0.0406012	1.44785	1.05543	1.98618	27.6975	0.00612397	NA	NA
CD127 on CD28+ CD45RA+ CD8+ T cell || id:ebi-a-GCST90001929	Inflammatory bowel disease	Weighted median	14	-0.0116584	0.0482929	0.809237	0.988409	0.899144	1.08654	NA	NA	NA	NA
CD127 on CD28- CD8+ T cell || id:ebi-a-GCST90001930	Inflammatory bowel disease	Inverse variance weighted	15	0.0473373	0.039029	0.225178	1.04848	0.971261	1.13183	17.0131	0.255483	-0.0219734	0.438734
CD127 on CD28- CD8+ T cell || id:ebi-a-GCST90001930	Inflammatory bowel disease	MR Egger	15	0.183287	0.174718	0.313268	1.20116	0.85286	1.6917	16.217	0.237611	NA	NA
CD127 on CD28- CD8+ T cell || id:ebi-a-GCST90001930	Inflammatory bowel disease	Weighted median	15	0.0124426	0.0539609	0.817637	1.01252	0.910901	1.12548	NA	NA	NA	NA
CD127 on CD4+ T cell || id:ebi-a-GCST90001931	Inflammatory bowel disease	Inverse variance weighted	7	-0.00466256	0.0475435	0.921877	0.995348	0.906787	1.09256	3.13924	0.791178	-0.0111177	0.767329
CD127 on CD4+ T cell || id:ebi-a-GCST90001931	Inflammatory bowel disease	MR Egger	7	0.0566093	0.201799	0.790313	1.05824	0.712542	1.57166	3.04164	0.693567	NA	NA
CD127 on CD4+ T cell || id:ebi-a-GCST90001931	Inflammatory bowel disease	Weighted median	7	0.0281821	0.06088	0.643427	1.02858	0.912888	1.15894	NA	NA	NA	NA
CD127 on CD45RA+ CD4+ T cell || id:ebi-a-GCST90001932	Inflammatory bowel disease	Inverse variance weighted	13	-0.0628491	0.0639488	0.325704	0.939085	0.828458	1.06448	52.2016	5.71e-07	0.0648622	0.183106
CD127 on CD45RA+ CD4+ T cell || id:ebi-a-GCST90001932	Inflammatory bowel disease	MR Egger	13	-0.402678	0.246941	0.131234	0.668527	0.412021	1.08472	44.1076	6.96e-06	NA	NA
CD127 on CD45RA+ CD4+ T cell || id:ebi-a-GCST90001932	Inflammatory bowel disease	Weighted median	13	0.0214121	0.0517573	0.679092	1.02164	0.923087	1.13072	NA	NA	NA	NA
CD25 on CD45RA- CD4 not regulatory T cell || id:ebi-a-GCST90001933	Inflammatory bowel disease	Inverse variance weighted	12	0.0434202	0.0385525	0.260055	1.04438	0.968368	1.12635	13.5406	0.259463	0.0127043	0.384736
CD25 on CD45RA- CD4 not regulatory T cell || id:ebi-a-GCST90001933	Inflammatory bowel disease	MR Egger	12	-0.00730626	0.0680024	0.916564	0.99272	0.868845	1.13426	12.5072	0.252545	NA	NA
CD25 on CD45RA- CD4 not regulatory T cell || id:ebi-a-GCST90001933	Inflammatory bowel disease	Weighted median	12	0.0153882	0.0410917	0.708044	1.01551	0.936926	1.10068	NA	NA	NA	NA
CD25 on CD45RA+ CD4 not regulatory T cell || id:ebi-a-GCST90001934	Inflammatory bowel disease	Inverse variance weighted	15	-0.0115386	0.0486584	0.812553	0.988528	0.898607	1.08745	25.038	0.0341937	-0.00743212	0.784482
CD25 on CD45RA+ CD4 not regulatory T cell || id:ebi-a-GCST90001934	Inflammatory bowel disease	MR Egger	15	0.0334101	0.168678	0.846054	1.03397	0.742896	1.4391	24.8888	0.0238725	NA	NA
CD25 on CD45RA+ CD4 not regulatory T cell || id:ebi-a-GCST90001934	Inflammatory bowel disease	Weighted median	15	-0.0276293	0.0564992	0.624827	0.972749	0.870778	1.08666	NA	NA	NA	NA
CD25 on CD39+ CD4 regulatory T cell || id:ebi-a-GCST90001935	Inflammatory bowel disease	Inverse variance weighted	11	0.0261263	0.0565251	0.643934	1.02647	0.918822	1.14673	16.0763	0.0974698	0.0388269	0.209734
CD25 on CD39+ CD4 regulatory T cell || id:ebi-a-GCST90001935	Inflammatory bowel disease	MR Egger	11	-0.20688	0.180847	0.282155	0.813117	0.570445	1.15902	13.3663	0.146719	NA	NA
CD25 on CD39+ CD4 regulatory T cell || id:ebi-a-GCST90001935	Inflammatory bowel disease	Weighted median	11	-0.00552344	0.066476	0.933781	0.994492	0.873003	1.13289	NA	NA	NA	NA
CD25 on CD4 regulatory T cell || id:ebi-a-GCST90001936	Inflammatory bowel disease	Inverse variance weighted	13	-0.0811461	0.0516269	0.116001	0.922059	0.833322	1.02024	19.3069	0.0813873	-0.00108799	0.973038
CD25 on CD4 regulatory T cell || id:ebi-a-GCST90001936	Inflammatory bowel disease	MR Egger	13	-0.0738371	0.218168	0.741402	0.928823	0.605654	1.42443	19.3048	0.0558376	NA	NA
CD25 on CD4 regulatory T cell || id:ebi-a-GCST90001936	Inflammatory bowel disease	Weighted median	13	-0.0712189	0.0614342	0.246346	0.931258	0.825612	1.05042	NA	NA	NA	NA
CD25 on resting CD4 regulatory T cell || id:ebi-a-GCST90001937	Inflammatory bowel disease	Inverse variance weighted	14	-0.0324039	0.058587	0.580202	0.968115	0.863092	1.08592	22.9893	0.0418046	-0.0208651	0.499325
CD25 on resting CD4 regulatory T cell || id:ebi-a-GCST90001937	Inflammatory bowel disease	MR Egger	14	0.0929971	0.189686	0.632785	1.09746	0.756701	1.59167	22.0958	0.0364598	NA	NA
CD25 on resting CD4 regulatory T cell || id:ebi-a-GCST90001937	Inflammatory bowel disease	Weighted median	14	0.0318697	0.0661023	0.629716	1.03238	0.906929	1.17519	NA	NA	NA	NA
CD25 on CD39+ resting CD4 regulatory T cell || id:ebi-a-GCST90001938	Inflammatory bowel disease	Inverse variance weighted	9	0.0632401	0.0532338	0.234846	1.06528	0.959735	1.18244	1.96981	0.981923	-0.00359727	0.907121
CD25 on CD39+ resting CD4 regulatory T cell || id:ebi-a-GCST90001938	Inflammatory bowel disease	MR Egger	9	0.0862638	0.197644	0.675648	1.09009	0.73999	1.60584	1.95518	0.962279	NA	NA
CD25 on CD39+ resting CD4 regulatory T cell || id:ebi-a-GCST90001938	Inflammatory bowel disease	Weighted median	9	0.0717345	0.0662737	0.279076	1.07437	0.943497	1.2234	NA	NA	NA	NA
CD25 on activated CD4 regulatory T cell || id:ebi-a-GCST90001939	Inflammatory bowel disease	Inverse variance weighted	12	-0.0572545	0.0576278	0.320456	0.944354	0.843492	1.05728	15.7181	0.151924	-0.0178951	0.663124
CD25 on activated CD4 regulatory T cell || id:ebi-a-GCST90001939	Inflammatory bowel disease	MR Egger	12	0.0461658	0.238066	0.850121	1.04725	0.656756	1.66992	15.4077	0.11789	NA	NA
CD25 on activated CD4 regulatory T cell || id:ebi-a-GCST90001939	Inflammatory bowel disease	Weighted median	12	0.000765736	0.0711237	0.99141	1.00077	0.870544	1.15047	NA	NA	NA	NA
CD25 on CD39+ activated CD4 regulatory T cell || id:ebi-a-GCST90001940	Inflammatory bowel disease	Inverse variance weighted	8	-0.0806725	0.076804	0.293549	0.922496	0.793574	1.07236	16.2715	0.0227482	-0.0364601	0.530723
CD25 on CD39+ activated CD4 regulatory T cell || id:ebi-a-GCST90001940	Inflammatory bowel disease	MR Egger	8	0.149186	0.354765	0.688751	1.16089	0.579173	2.32687	15.1543	0.0190897	NA	NA
CD25 on CD39+ activated CD4 regulatory T cell || id:ebi-a-GCST90001940	Inflammatory bowel disease	Weighted median	8	-0.0493917	0.0740609	0.504832	0.951808	0.823204	1.1005	NA	NA	NA	NA
CD25 on secreting CD4 regulatory T cell || id:ebi-a-GCST90001941	Inflammatory bowel disease	Inverse variance weighted	8	-0.0161189	0.0648371	0.803666	0.98401	0.866581	1.11735	10.6234	0.155912	-0.0503743	0.390331
CD25 on secreting CD4 regulatory T cell || id:ebi-a-GCST90001941	Inflammatory bowel disease	MR Egger	8	0.288673	0.335721	0.422886	1.33466	0.691191	2.57715	9.29583	0.157611	NA	NA
CD25 on secreting CD4 regulatory T cell || id:ebi-a-GCST90001941	Inflammatory bowel disease	Weighted median	8	0.0226329	0.0756688	0.76486	1.02289	0.881899	1.18642	NA	NA	NA	NA
CD25 on CD39+ secreting CD4 regulatory T cell || id:ebi-a-GCST90001942	Inflammatory bowel disease	Inverse variance weighted	8	0.0237304	0.0496831	0.632909	1.02401	0.928998	1.12875	7.5693	0.372099	0.00698613	0.842308
CD25 on CD39+ secreting CD4 regulatory T cell || id:ebi-a-GCST90001942	Inflammatory bowel disease	MR Egger	8	-0.0195696	0.215189	0.930499	0.980621	0.643174	1.49511	7.51524	0.27581	NA	NA
CD25 on CD39+ secreting CD4 regulatory T cell || id:ebi-a-GCST90001942	Inflammatory bowel disease	Weighted median	8	0.0276157	0.0643172	0.667657	1.028	0.906245	1.16611	NA	NA	NA	NA
CD25 on activated & secreting CD4 regulatory T cell || id:ebi-a-GCST90001943	Inflammatory bowel disease	Inverse variance weighted	8	-0.060041	0.0823032	0.46569	0.941726	0.801432	1.10658	15.8611	0.0264159	-0.00776644	0.871307
CD25 on activated & secreting CD4 regulatory T cell || id:ebi-a-GCST90001943	Inflammatory bowel disease	MR Egger	8	-0.0153333	0.278928	0.957945	0.984784	0.570049	1.70125	15.7859	0.0149503	NA	NA
CD25 on activated & secreting CD4 regulatory T cell || id:ebi-a-GCST90001943	Inflammatory bowel disease	Weighted median	8	-0.0731097	0.0795238	0.357916	0.929499	0.795347	1.08628	NA	NA	NA	NA
CD123 on plasmacytoid Dendritic Cell || id:ebi-a-GCST90001944	Inflammatory bowel disease	Inverse variance weighted	10	-0.0401794	0.0587209	0.493822	0.960617	0.856182	1.07779	24.5701	0.00348538	0.0266885	0.491039
CD123 on plasmacytoid Dendritic Cell || id:ebi-a-GCST90001944	Inflammatory bowel disease	MR Egger	10	-0.170121	0.189897	0.396484	0.843563	0.581398	1.22394	23.0683	0.00327767	NA	NA
CD123 on plasmacytoid Dendritic Cell || id:ebi-a-GCST90001944	Inflammatory bowel disease	Weighted median	10	-0.0514053	0.0498085	0.302045	0.949894	0.861543	1.0473	NA	NA	NA	NA
CD123 on CD62L+ plasmacytoid Dendritic Cell || id:ebi-a-GCST90001945	Inflammatory bowel disease	Inverse variance weighted	10	-0.0402619	0.0589598	0.494689	0.960538	0.85571	1.07821	24.575	0.0034791	0.0274505	0.484947
CD123 on CD62L+ plasmacytoid Dendritic Cell || id:ebi-a-GCST90001945	Inflammatory bowel disease	MR Egger	10	-0.174659	0.193281	0.392577	0.839743	0.57494	1.22651	23.0316	0.00332393	NA	NA
CD123 on CD62L+ plasmacytoid Dendritic Cell || id:ebi-a-GCST90001945	Inflammatory bowel disease	Weighted median	10	-0.0518557	0.0536821	0.334055	0.949466	0.854642	1.05481	NA	NA	NA	NA
CD33 on CD14+ monocyte || id:ebi-a-GCST90001946	Inflammatory bowel disease	Inverse variance weighted	20	0.0282175	0.0134322	0.0356644	1.02862	1.00189	1.05606	18.9383	0.460798	0.00316302	0.736905
CD33 on CD14+ monocyte || id:ebi-a-GCST90001946	Inflammatory bowel disease	MR Egger	20	0.0226496	0.0213286	0.302305	1.02291	0.981028	1.06658	18.8166	0.403195	NA	NA
CD33 on CD14+ monocyte || id:ebi-a-GCST90001946	Inflammatory bowel disease	Weighted median	20	0.0251042	0.0153885	0.102814	1.02542	0.994956	1.05682	NA	NA	NA	NA
CD33 on CD33+ HLA DR+ CD14dim || id:ebi-a-GCST90001947	Inflammatory bowel disease	Inverse variance weighted	19	0.00773361	0.0163521	0.636254	1.00776	0.975977	1.04059	30.1777	0.0357544	-0.0110098	0.309808
CD33 on CD33+ HLA DR+ CD14dim || id:ebi-a-GCST90001947	Inflammatory bowel disease	MR Egger	19	0.0275233	0.0249662	0.28564	1.02791	0.978817	1.07946	28.35	0.0410112	NA	NA
CD33 on CD33+ HLA DR+ CD14dim || id:ebi-a-GCST90001947	Inflammatory bowel disease	Weighted median	19	0.0197381	0.0145825	0.17588	1.01993	0.991195	1.04951	NA	NA	NA	NA
CD33 on CD33dim HLA DR+ CD11b+ || id:ebi-a-GCST90001948	Inflammatory bowel disease	Inverse variance weighted	21	0.0414071	0.024134	0.0862141	1.04228	0.994122	1.09276	64.6516	1.33e-06	0.0132555	0.427648
CD33 on CD33dim HLA DR+ CD11b+ || id:ebi-a-GCST90001948	Inflammatory bowel disease	MR Egger	21	0.0171055	0.0386194	0.662822	1.01725	0.943095	1.09724	62.4907	1.55e-06	NA	NA
CD33 on CD33dim HLA DR+ CD11b+ || id:ebi-a-GCST90001948	Inflammatory bowel disease	Weighted median	21	0.0243641	0.0153753	0.113053	1.02466	0.994245	1.05601	NA	NA	NA	NA
CD33 on CD33dim HLA DR+ CD11b- || id:ebi-a-GCST90001949	Inflammatory bowel disease	Inverse variance weighted	20	0.0436738	0.0244254	0.0737683	1.04464	0.995809	1.09587	63.0081	1.28e-06	0.0232424	0.165582
CD33 on CD33dim HLA DR+ CD11b- || id:ebi-a-GCST90001949	Inflammatory bowel disease	MR Egger	20	-0.00052562	0.0387248	0.98932	0.999475	0.926421	1.07829	56.457	7.55e-06	NA	NA
CD33 on CD33dim HLA DR+ CD11b- || id:ebi-a-GCST90001949	Inflammatory bowel disease	Weighted median	20	0.0245764	0.0157971	0.119768	1.02488	0.993634	1.05711	NA	NA	NA	NA
CD33 on Granulocytic Myeloid-Derived Suppressor Cells || id:ebi-a-GCST90001950	Inflammatory bowel disease	Inverse variance weighted	13	0.0123958	0.0163804	0.449204	1.01247	0.980483	1.04551	8.4287	0.750797	-0.00902417	0.461963
CD33 on Granulocytic Myeloid-Derived Suppressor Cells || id:ebi-a-GCST90001950	Inflammatory bowel disease	MR Egger	13	0.0338879	0.0326097	0.321015	1.03447	0.970419	1.10275	7.84772	0.726876	NA	NA
CD33 on Granulocytic Myeloid-Derived Suppressor Cells || id:ebi-a-GCST90001950	Inflammatory bowel disease	Weighted median	13	0.0177679	0.0205277	0.386732	1.01793	0.977784	1.05972	NA	NA	NA	NA
CD33 on CD66b++ myeloid cell || id:ebi-a-GCST90001951	Inflammatory bowel disease	Inverse variance weighted	13	0.0244991	0.0155097	0.114199	1.0248	0.994117	1.05643	8.79185	0.720599	0.00562117	0.661229
CD33 on CD66b++ myeloid cell || id:ebi-a-GCST90001951	Inflammatory bowel disease	MR Egger	13	0.0135933	0.0287589	0.645694	1.01369	0.958128	1.07247	8.58907	0.659765	NA	NA
CD33 on CD66b++ myeloid cell || id:ebi-a-GCST90001951	Inflammatory bowel disease	Weighted median	13	0.0284284	0.0181276	0.116826	1.02884	0.992923	1.06605	NA	NA	NA	NA
CD33 on Monocytic Myeloid-Derived Suppressor Cells || id:ebi-a-GCST90001952	Inflammatory bowel disease	Inverse variance weighted	18	0.0159275	0.0132486	0.229286	1.01606	0.99001	1.04278	11.1197	0.850275	-0.00810437	0.307666
CD33 on Monocytic Myeloid-Derived Suppressor Cells || id:ebi-a-GCST90001952	Inflammatory bowel disease	MR Egger	18	0.0320268	0.0202228	0.132826	1.03255	0.992419	1.07429	10.0094	0.866139	NA	NA
CD33 on Monocytic Myeloid-Derived Suppressor Cells || id:ebi-a-GCST90001952	Inflammatory bowel disease	Weighted median	18	0.0232458	0.0160541	0.147627	1.02352	0.991813	1.05624	NA	NA	NA	NA
CD33 on CD33dim HLA DR- || id:ebi-a-GCST90001953	Inflammatory bowel disease	Inverse variance weighted	18	0.0160386	0.0133694	0.230276	1.01617	0.989886	1.04315	9.18101	0.934411	1.93e-05	0.998475
CD33 on CD33dim HLA DR- || id:ebi-a-GCST90001953	Inflammatory bowel disease	MR Egger	18	0.0160067	0.0211486	0.460129	1.01614	0.974876	1.05914	9.18101	0.905772	NA	NA
CD33 on CD33dim HLA DR- || id:ebi-a-GCST90001953	Inflammatory bowel disease	Weighted median	18	0.0231958	0.0156395	0.138033	1.02347	0.99257	1.05533	NA	NA	NA	NA
CD33 on basophil || id:ebi-a-GCST90001954	Inflammatory bowel disease	Inverse variance weighted	18	0.00662383	0.013558	0.625158	1.00665	0.980248	1.03375	14.859	0.605636	-0.00980136	0.337061
CD33 on basophil || id:ebi-a-GCST90001954	Inflammatory bowel disease	MR Egger	18	0.0228137	0.0212467	0.298863	1.02308	0.981346	1.06658	13.8795	0.607687	NA	NA
CD33 on basophil || id:ebi-a-GCST90001954	Inflammatory bowel disease	Weighted median	18	0.0181688	0.0161144	0.259536	1.01833	0.986674	1.05101	NA	NA	NA	NA
CD33 on Immature Myeloid-Derived Suppressor Cells || id:ebi-a-GCST90001955	Inflammatory bowel disease	Inverse variance weighted	19	0.00832109	0.0138172	0.547024	1.00836	0.981414	1.03604	11.3863	0.877253	-0.0096388	0.358356
CD33 on Immature Myeloid-Derived Suppressor Cells || id:ebi-a-GCST90001955	Inflammatory bowel disease	MR Egger	19	0.0242461	0.021805	0.281637	1.02454	0.981678	1.06928	10.495	0.881582	NA	NA
CD33 on Immature Myeloid-Derived Suppressor Cells || id:ebi-a-GCST90001955	Inflammatory bowel disease	Weighted median	19	0.0140793	0.0165828	0.395862	1.01418	0.981746	1.04768	NA	NA	NA	NA
CD33 on CD33+ HLA DR+ || id:ebi-a-GCST90001956	Inflammatory bowel disease	Inverse variance weighted	18	0.0110617	0.0147769	0.45411	1.01112	0.982258	1.04084	23.1189	0.145421	-0.00859823	0.416019
CD33 on CD33+ HLA DR+ || id:ebi-a-GCST90001956	Inflammatory bowel disease	MR Egger	18	0.0258537	0.0231549	0.280672	1.02619	0.98066	1.07384	22.1535	0.138303	NA	NA
CD33 on CD33+ HLA DR+ || id:ebi-a-GCST90001956	Inflammatory bowel disease	Weighted median	18	0.0196075	0.0147108	0.182576	1.0198	0.990817	1.04963	NA	NA	NA	NA
CD33 on CD33+ HLA DR+ CD14- || id:ebi-a-GCST90001957	Inflammatory bowel disease	Inverse variance weighted	17	0.0112169	0.0149434	0.452879	1.01128	0.98209	1.04134	22.0641	0.141133	-0.00932128	0.419885
CD33 on CD33+ HLA DR+ CD14- || id:ebi-a-GCST90001957	Inflammatory bowel disease	MR Egger	17	0.026465	0.0237854	0.283369	1.02682	0.980047	1.07582	21.0967	0.133769	NA	NA
CD33 on CD33+ HLA DR+ CD14- || id:ebi-a-GCST90001957	Inflammatory bowel disease	Weighted median	17	0.0198709	0.0145033	0.170659	1.02007	0.991481	1.04948	NA	NA	NA	NA
CD4 on monocyte || id:ebi-a-GCST90001958	Inflammatory bowel disease	Inverse variance weighted	10	0.0344516	0.0990649	0.728014	1.03505	0.852386	1.25686	57.1144	4.8e-09	0.0484551	0.405207
CD4 on monocyte || id:ebi-a-GCST90001958	Inflammatory bowel disease	MR Egger	10	-0.240874	0.329025	0.485009	0.785941	0.4124	1.49783	52.0877	1.62e-08	NA	NA
CD4 on monocyte || id:ebi-a-GCST90001958	Inflammatory bowel disease	Weighted median	10	-0.054228	0.0535175	0.310928	0.947216	0.852892	1.05197	NA	NA	NA	NA
CD4 on HLA DR+ CD4+ T cell || id:ebi-a-GCST90001959	Inflammatory bowel disease	Inverse variance weighted	12	0.080333	0.042176	0.056818	1.08365	0.997671	1.17703	9.41137	0.583977	0.0294286	0.235801
CD4 on HLA DR+ CD4+ T cell || id:ebi-a-GCST90001959	Inflammatory bowel disease	MR Egger	12	-0.0942345	0.144678	0.529509	0.910069	0.685366	1.20844	7.82028	0.646386	NA	NA
CD4 on HLA DR+ CD4+ T cell || id:ebi-a-GCST90001959	Inflammatory bowel disease	Weighted median	12	0.0782432	0.0616098	0.204092	1.08139	0.958379	1.22018	NA	NA	NA	NA
CD25 on CD4+ T cell || id:ebi-a-GCST90001960	Inflammatory bowel disease	Inverse variance weighted	8	0.0217542	0.0445156	0.625063	1.02199	0.936602	1.11517	6.70866	0.459832	-0.00762044	0.796701
CD25 on CD4+ T cell || id:ebi-a-GCST90001960	Inflammatory bowel disease	MR Egger	8	0.0534753	0.126733	0.68776	1.05493	0.8229	1.35239	6.62852	0.356571	NA	NA
CD25 on CD4+ T cell || id:ebi-a-GCST90001960	Inflammatory bowel disease	Weighted median	8	0.0200718	0.0552407	0.716342	1.02027	0.915578	1.13694	NA	NA	NA	NA
CD25 on CD39+ CD4+ T cell || id:ebi-a-GCST90001961	Inflammatory bowel disease	Inverse variance weighted	12	-0.00597394	0.0227807	0.793139	0.994044	0.950636	1.03943	14.1074	0.227106	-0.0210433	0.132456
CD25 on CD39+ CD4+ T cell || id:ebi-a-GCST90001961	Inflammatory bowel disease	MR Egger	12	0.0398824	0.0351255	0.282679	1.04069	0.971452	1.11486	11.123	0.348017	NA	NA
CD25 on CD39+ CD4+ T cell || id:ebi-a-GCST90001961	Inflammatory bowel disease	Weighted median	12	0.00470277	0.0220926	0.831431	1.00471	0.962137	1.04918	NA	NA	NA	NA
CD25 on CD28+ CD4+ T cell || id:ebi-a-GCST90001962	Inflammatory bowel disease	Inverse variance weighted	4	0.00548386	0.0876201	0.950096	1.0055	0.846833	1.19389	4.86653	0.181835	0.059692	0.498525
CD25 on CD28+ CD4+ T cell || id:ebi-a-GCST90001962	Inflammatory bowel disease	MR Egger	4	-0.332006	0.422055	0.5139	0.717483	0.313726	1.64086	3.64271	0.161807	NA	NA
CD25 on CD28+ CD4+ T cell || id:ebi-a-GCST90001962	Inflammatory bowel disease	Weighted median	4	-0.0408531	0.0870628	0.6389	0.95997	0.809372	1.13859	NA	NA	NA	NA
FSC-A on myeloid Dendritic Cell || id:ebi-a-GCST90001963	Inflammatory bowel disease	Inverse variance weighted	15	0.0152867	0.0293524	0.602507	1.0154	0.958636	1.07553	9.64185	0.787872	-0.00314243	0.848973
FSC-A on myeloid Dendritic Cell || id:ebi-a-GCST90001963	Inflammatory bowel disease	MR Egger	15	0.0293096	0.0779249	0.712889	1.02974	0.88389	1.19967	9.60411	0.725942	NA	NA
FSC-A on myeloid Dendritic Cell || id:ebi-a-GCST90001963	Inflammatory bowel disease	Weighted median	15	0.0496486	0.0407969	0.223616	1.0509	0.970141	1.13838	NA	NA	NA	NA
FSC-A on plasmacytoid Dendritic Cell || id:ebi-a-GCST90001964	Inflammatory bowel disease	Inverse variance weighted	15	-0.0105907	0.0349164	0.761649	0.989465	0.924015	1.05955	12.7284	0.548009	-0.0174011	0.421154
FSC-A on plasmacytoid Dendritic Cell || id:ebi-a-GCST90001964	Inflammatory bowel disease	MR Egger	15	0.0875178	0.123161	0.489886	1.09146	0.857377	1.38946	12.0384	0.524496	NA	NA
FSC-A on plasmacytoid Dendritic Cell || id:ebi-a-GCST90001964	Inflammatory bowel disease	Weighted median	15	0.0266761	0.048795	0.584587	1.02704	0.933362	1.13011	NA	NA	NA	NA
FSC-A on monocyte || id:ebi-a-GCST90001965	Inflammatory bowel disease	Inverse variance weighted	16	0.0423957	0.0391545	0.278907	1.04331	0.966236	1.12653	17.9263	0.26656	-0.0121832	0.653261
FSC-A on monocyte || id:ebi-a-GCST90001965	Inflammatory bowel disease	MR Egger	16	0.107297	0.147	0.477482	1.11326	0.834583	1.485	17.6605	0.222684	NA	NA
FSC-A on monocyte || id:ebi-a-GCST90001965	Inflammatory bowel disease	Weighted median	16	0.0640919	0.0498	0.1981	1.06619	0.967039	1.17551	NA	NA	NA	NA
FSC-A on granulocyte || id:ebi-a-GCST90001966	Inflammatory bowel disease	Inverse variance weighted	15	-0.103131	0.042309	0.0147865	0.902009	0.830226	0.979997	22.2386	0.0738427	0.0322406	0.133581
FSC-A on granulocyte || id:ebi-a-GCST90001966	Inflammatory bowel disease	MR Egger	15	-0.259844	0.105841	0.0289376	0.771172	0.626697	0.948954	18.5793	0.136735	NA	NA
FSC-A on granulocyte || id:ebi-a-GCST90001966	Inflammatory bowel disease	Weighted median	15	-0.100196	0.0537546	0.0623279	0.90466	0.814195	1.00518	NA	NA	NA	NA
FSC-A on CD14+ monocyte || id:ebi-a-GCST90001967	Inflammatory bowel disease	Inverse variance weighted	16	0.0358492	0.0357297	0.315694	1.0365	0.966397	1.11169	24.1663	0.0623225	-0.0230904	0.113663
FSC-A on CD14+ monocyte || id:ebi-a-GCST90001967	Inflammatory bowel disease	MR Egger	16	0.116883	0.0586745	0.0662402	1.12399	1.00188	1.26097	20.0819	0.127581	NA	NA
FSC-A on CD14+ monocyte || id:ebi-a-GCST90001967	Inflammatory bowel disease	Weighted median	16	0.0731403	0.0432886	0.0911051	1.07588	0.988363	1.17115	NA	NA	NA	NA
FSC-A on B cell || id:ebi-a-GCST90001968	Inflammatory bowel disease	Inverse variance weighted	13	0.00813736	0.0426879	0.84882	1.00817	0.927251	1.09615	15.9259	0.194655	0.0273701	0.259735
FSC-A on B cell || id:ebi-a-GCST90001968	Inflammatory bowel disease	MR Egger	13	-0.136889	0.12906	0.311579	0.872067	0.67716	1.12307	14.114	0.226747	NA	NA
FSC-A on B cell || id:ebi-a-GCST90001968	Inflammatory bowel disease	Weighted median	13	0.010975	0.0519232	0.832599	1.01104	0.913205	1.11935	NA	NA	NA	NA
FSC-A on Natural Killer || id:ebi-a-GCST90001969	Inflammatory bowel disease	Inverse variance weighted	16	-0.0345688	0.0454606	0.447009	0.966022	0.88367	1.05605	27.0526	0.0283106	0.0150146	0.562388
FSC-A on Natural Killer || id:ebi-a-GCST90001969	Inflammatory bowel disease	MR Egger	16	-0.111697	0.138038	0.431955	0.894316	0.682323	1.17217	26.3889	0.0230899	NA	NA
FSC-A on Natural Killer || id:ebi-a-GCST90001969	Inflammatory bowel disease	Weighted median	16	-0.0429558	0.0548068	0.433176	0.957954	0.860383	1.06659	NA	NA	NA	NA
FSC-A on HLA DR+ Natural Killer || id:ebi-a-GCST90001970	Inflammatory bowel disease	Inverse variance weighted	12	-0.00851917	0.0501008	0.864978	0.991517	0.89878	1.09382	24.6388	0.010293	-0.00792558	0.763683
FSC-A on HLA DR+ Natural Killer || id:ebi-a-GCST90001970	Inflammatory bowel disease	MR Egger	12	0.0230401	0.114752	0.844894	1.02331	0.817198	1.2814	24.4058	0.0065931	NA	NA
FSC-A on HLA DR+ Natural Killer || id:ebi-a-GCST90001970	Inflammatory bowel disease	Weighted median	12	0.0194484	0.0456626	0.67017	1.01964	0.932347	1.1151	NA	NA	NA	NA
FSC-A on lymphocyte || id:ebi-a-GCST90001971	Inflammatory bowel disease	Inverse variance weighted	11	-0.0482412	0.0935424	0.606053	0.952904	0.793276	1.14465	37.3144	4.99e-05	-0.0495164	0.444195
FSC-A on lymphocyte || id:ebi-a-GCST90001971	Inflammatory bowel disease	MR Egger	11	0.295609	0.440132	0.518681	1.34394	0.567196	3.18441	34.8358	6.37e-05	NA	NA
FSC-A on lymphocyte || id:ebi-a-GCST90001971	Inflammatory bowel disease	Weighted median	11	0.0499963	0.0728017	0.492243	1.05127	0.911471	1.2125	NA	NA	NA	NA
FSC-A on T cell || id:ebi-a-GCST90001972	Inflammatory bowel disease	Inverse variance weighted	12	-0.0393155	0.0813247	0.628785	0.961447	0.819786	1.12759	38.0548	7.66e-05	-0.00765407	0.904332
FSC-A on T cell || id:ebi-a-GCST90001972	Inflammatory bowel disease	MR Egger	12	0.0131169	0.433785	0.976472	1.0132	0.432963	2.37106	37.997	3.8e-05	NA	NA
FSC-A on T cell || id:ebi-a-GCST90001972	Inflammatory bowel disease	Weighted median	12	0.0154077	0.0659238	0.815202	1.01553	0.892434	1.1556	NA	NA	NA	NA
FSC-A on CD4+ T cell || id:ebi-a-GCST90001973	Inflammatory bowel disease	Inverse variance weighted	13	0.0331901	0.110532	0.763966	1.03375	0.832392	1.28381	89.2343	6.94e-14	-0.102086	0.194583
FSC-A on CD4+ T cell || id:ebi-a-GCST90001973	Inflammatory bowel disease	MR Egger	13	0.670369	0.473422	0.18446	1.95496	0.772953	4.9445	76.0432	8.55e-12	NA	NA
FSC-A on CD4+ T cell || id:ebi-a-GCST90001973	Inflammatory bowel disease	Weighted median	13	-0.0135871	0.0609048	0.823467	0.986505	0.8755	1.11158	NA	NA	NA	NA
FSC-A on CD8+ T cell || id:ebi-a-GCST90001974	Inflammatory bowel disease	Inverse variance weighted	14	0.0852607	0.0424867	0.0447752	1.089	1.00199	1.18357	13.7402	0.392389	-0.0290168	0.263485
FSC-A on CD8+ T cell || id:ebi-a-GCST90001974	Inflammatory bowel disease	MR Egger	14	0.281661	0.172569	0.128591	1.32533	0.944997	1.85874	12.3264	0.419832	NA	NA
FSC-A on CD8+ T cell || id:ebi-a-GCST90001974	Inflammatory bowel disease	Weighted median	14	0.0963104	0.0580967	0.0973661	1.1011	0.982594	1.2339	NA	NA	NA	NA
FSC-A on HLA DR+ T cell || id:ebi-a-GCST90001975	Inflammatory bowel disease	Inverse variance weighted	11	-0.0650371	0.0433445	0.133493	0.937033	0.860715	1.02012	7.69117	0.658974	0.0213323	0.696984
FSC-A on HLA DR+ T cell || id:ebi-a-GCST90001975	Inflammatory bowel disease	MR Egger	11	-0.211426	0.366622	0.578287	0.809429	0.394552	1.66056	7.52947	0.582167	NA	NA
FSC-A on HLA DR+ T cell || id:ebi-a-GCST90001975	Inflammatory bowel disease	Weighted median	11	-0.0670671	0.0589468	0.255223	0.935132	0.833099	1.04966	NA	NA	NA	NA
FSC-A on Natural Killer T || id:ebi-a-GCST90001976	Inflammatory bowel disease	Inverse variance weighted	16	-0.0684244	0.0484457	0.157834	0.933864	0.84927	1.02688	22.8328	0.0877553	0.0213238	0.451885
FSC-A on Natural Killer T || id:ebi-a-GCST90001976	Inflammatory bowel disease	MR Egger	16	-0.174459	0.145555	0.250587	0.839911	0.631444	1.1172	21.8962	0.0807733	NA	NA
FSC-A on Natural Killer T || id:ebi-a-GCST90001976	Inflammatory bowel disease	Weighted median	16	-0.0248903	0.0620539	0.68834	0.975417	0.863712	1.10157	NA	NA	NA	NA
FSC-A on HLA DR+ CD4+ T cell || id:ebi-a-GCST90001977	Inflammatory bowel disease	Inverse variance weighted	10	0.0205297	0.0479272	0.668395	1.02074	0.929222	1.12128	10.729	0.294741	-0.0319878	0.177931
FSC-A on HLA DR+ CD4+ T cell || id:ebi-a-GCST90001977	Inflammatory bowel disease	MR Egger	10	0.196159	0.127163	0.161506	1.21672	0.948304	1.56111	8.43025	0.392609	NA	NA
FSC-A on HLA DR+ CD4+ T cell || id:ebi-a-GCST90001977	Inflammatory bowel disease	Weighted median	10	0.0273945	0.063634	0.666831	1.02777	0.907258	1.1643	NA	NA	NA	NA
FSC-A on HLA DR+ CD8+ T cell || id:ebi-a-GCST90001978	Inflammatory bowel disease	Inverse variance weighted	7	-0.0160558	0.0605806	0.790985	0.984072	0.873896	1.10814	5.77582	0.448766	0.0165864	0.665272
FSC-A on HLA DR+ CD8+ T cell || id:ebi-a-GCST90001978	Inflammatory bowel disease	MR Egger	7	-0.127717	0.25132	0.632943	0.880103	0.537781	1.44033	5.54196	0.353367	NA	NA
FSC-A on HLA DR+ CD8+ T cell || id:ebi-a-GCST90001978	Inflammatory bowel disease	Weighted median	7	-0.0625022	0.0775562	0.420303	0.939411	0.806935	1.09364	NA	NA	NA	NA
CD16 on CD14- CD16+ monocyte || id:ebi-a-GCST90001979	Inflammatory bowel disease	Inverse variance weighted	13	0.0249207	0.0238961	0.297005	1.02523	0.978323	1.07439	14.3225	0.280589	0.0229036	0.0827075
CD16 on CD14- CD16+ monocyte || id:ebi-a-GCST90001979	Inflammatory bowel disease	MR Egger	13	-0.0238255	0.0336243	0.493328	0.976456	0.914179	1.04298	10.679	0.470537	NA	NA
CD16 on CD14- CD16+ monocyte || id:ebi-a-GCST90001979	Inflammatory bowel disease	Weighted median	13	0.00745601	0.0256893	0.771634	1.00748	0.958012	1.05951	NA	NA	NA	NA
CD40 on CD14+ CD16- monocyte || id:ebi-a-GCST90001980	Inflammatory bowel disease	Inverse variance weighted	16	-0.0782817	0.0384947	0.0419948	0.924704	0.857502	0.997172	51.5798	6.63e-06	0.00654821	0.766091
CD40 on CD14+ CD16- monocyte || id:ebi-a-GCST90001980	Inflammatory bowel disease	MR Egger	16	-0.095924	0.0704266	0.194699	0.908533	0.791393	1.04301	51.243	3.77e-06	NA	NA
CD40 on CD14+ CD16- monocyte || id:ebi-a-GCST90001980	Inflammatory bowel disease	Weighted median	16	-0.0276208	0.0310295	0.373387	0.972757	0.915359	1.03375	NA	NA	NA	NA
CD40 on CD14+ CD16+ monocyte || id:ebi-a-GCST90001981	Inflammatory bowel disease	Inverse variance weighted	10	-0.0802215	0.0462814	0.0830351	0.922912	0.842878	1.01055	47.6585	2.96e-07	-0.0043235	0.916034
CD40 on CD14+ CD16+ monocyte || id:ebi-a-GCST90001981	Inflammatory bowel disease	MR Egger	10	-0.070671	0.10055	0.502087	0.931768	0.7651	1.13474	47.5881	1.18e-07	NA	NA
CD40 on CD14+ CD16+ monocyte || id:ebi-a-GCST90001981	Inflammatory bowel disease	Weighted median	10	-0.0489668	0.0345518	0.156424	0.952213	0.889863	1.01893	NA	NA	NA	NA
CCR2 on CD14- CD16+ monocyte || id:ebi-a-GCST90001982	Inflammatory bowel disease	Inverse variance weighted	16	-0.0556096	0.0380956	0.144362	0.945908	0.877852	1.01924	6.88564	0.960746	0.032078	0.251246
CCR2 on CD14- CD16+ monocyte || id:ebi-a-GCST90001982	Inflammatory bowel disease	MR Egger	16	-0.230073	0.150667	0.149025	0.794475	0.591331	1.06741	5.45323	0.978452	NA	NA
CCR2 on CD14- CD16+ monocyte || id:ebi-a-GCST90001982	Inflammatory bowel disease	Weighted median	16	-0.0522269	0.0503741	0.299838	0.949113	0.859882	1.0476	NA	NA	NA	NA
CD14 on CD14+ CD16+ monocyte || id:ebi-a-GCST90001983	Inflammatory bowel disease	Inverse variance weighted	15	-0.119893	0.0628774	0.0565489	0.887015	0.784167	1.00335	46.218	2.58e-05	-0.0114641	0.811799
CD14 on CD14+ CD16+ monocyte || id:ebi-a-GCST90001983	Inflammatory bowel disease	MR Egger	15	-0.052672	0.284191	0.855823	0.948691	0.543521	1.6559	46.009	1.42e-05	NA	NA
CD14 on CD14+ CD16+ monocyte || id:ebi-a-GCST90001983	Inflammatory bowel disease	Weighted median	15	-0.0816707	0.0534278	0.126359	0.921575	0.82995	1.02332	NA	NA	NA	NA
HLA DR on CD14- CD16+ monocyte || id:ebi-a-GCST90001984	Inflammatory bowel disease	Inverse variance weighted	13	-0.123021	0.0390524	0.00163185	0.884245	0.819088	0.954585	18.0182	0.115139	0.0270272	0.185245
HLA DR on CD14- CD16+ monocyte || id:ebi-a-GCST90001984	Inflammatory bowel disease	MR Egger	13	-0.250361	0.0976045	0.0262809	0.77852	0.642964	0.942654	15.2493	0.171365	NA	NA
HLA DR on CD14- CD16+ monocyte || id:ebi-a-GCST90001984	Inflammatory bowel disease	Weighted median	13	-0.156793	0.0423981	0.000217219	0.854881	0.786712	0.928958	NA	NA	NA	NA
CD40 on monocytes || id:ebi-a-GCST90001985	Inflammatory bowel disease	Inverse variance weighted	16	-0.0560431	0.0368806	0.128616	0.945498	0.879564	1.01638	58.7938	4.06e-07	0.0225249	0.300994
CD40 on monocytes || id:ebi-a-GCST90001985	Inflammatory bowel disease	MR Egger	16	-0.110832	0.0628403	0.099582	0.895089	0.791363	1.01241	54.3185	1.13e-06	NA	NA
CD40 on monocytes || id:ebi-a-GCST90001985	Inflammatory bowel disease	Weighted median	16	-0.0111365	0.029084	0.701789	0.988925	0.934129	1.04694	NA	NA	NA	NA
CD14 on CD14+ CD16- monocyte || id:ebi-a-GCST90001986	Inflammatory bowel disease	Inverse variance weighted	13	-0.0430631	0.0387942	0.266982	0.957851	0.887719	1.03352	6.26957	0.901888	0.0195303	0.34397
CD14 on CD14+ CD16- monocyte || id:ebi-a-GCST90001986	Inflammatory bowel disease	MR Egger	13	-0.14585	0.110945	0.21539	0.864287	0.695376	1.07423	5.29167	0.916222	NA	NA
CD14 on CD14+ CD16- monocyte || id:ebi-a-GCST90001986	Inflammatory bowel disease	Weighted median	13	-0.0583006	0.0539585	0.279933	0.943366	0.848692	1.0486	NA	NA	NA	NA
CD64 on CD14+ CD16- monocyte || id:ebi-a-GCST90001987	Inflammatory bowel disease	Inverse variance weighted	19	-0.110668	0.037396	0.00308292	0.895236	0.831966	0.963318	45.3861	0.000364388	0.0281499	0.0727809
CD64 on CD14+ CD16- monocyte || id:ebi-a-GCST90001987	Inflammatory bowel disease	MR Egger	19	-0.207372	0.0614382	0.00359483	0.812717	0.720513	0.91672	37.3484	0.00301774	NA	NA
CD64 on CD14+ CD16- monocyte || id:ebi-a-GCST90001987	Inflammatory bowel disease	Weighted median	19	-0.0611432	0.041533	0.140978	0.940689	0.867146	1.02047	NA	NA	NA	NA
HLA DR on CD14+ CD16- monocyte || id:ebi-a-GCST90001988	Inflammatory bowel disease	Inverse variance weighted	13	0.104968	0.0415728	0.0115723	1.11068	1.02376	1.20497	41.8754	3.5e-05	-0.00609874	0.834177
HLA DR on CD14+ CD16- monocyte || id:ebi-a-GCST90001988	Inflammatory bowel disease	MR Egger	13	0.119318	0.07974	0.162694	1.12673	0.963703	1.31733	41.7012	1.82e-05	NA	NA
HLA DR on CD14+ CD16- monocyte || id:ebi-a-GCST90001988	Inflammatory bowel disease	Weighted median	13	0.0202794	0.0384153	0.597569	1.02049	0.946471	1.10029	NA	NA	NA	NA
CD40 on CD14- CD16+ monocyte || id:ebi-a-GCST90001989	Inflammatory bowel disease	Inverse variance weighted	19	-0.067578	0.0361316	0.0614379	0.934655	0.870754	1.00325	72.6698	1.59e-08	0.0156912	0.488752
CD40 on CD14- CD16+ monocyte || id:ebi-a-GCST90001989	Inflammatory bowel disease	MR Egger	19	-0.105358	0.0647536	0.122115	0.900002	0.792728	1.02179	70.5904	1.71e-08	NA	NA
CD40 on CD14- CD16+ monocyte || id:ebi-a-GCST90001989	Inflammatory bowel disease	Weighted median	19	-0.0573413	0.0344358	0.0958793	0.944272	0.882642	1.0102	NA	NA	NA	NA
CD64 on CD14- CD16+ monocyte || id:ebi-a-GCST90001990	Inflammatory bowel disease	Inverse variance weighted	17	0.0209176	0.041932	0.617888	1.02114	0.94057	1.10861	26.1119	0.0524739	0.0233653	0.362559
CD64 on CD14- CD16+ monocyte || id:ebi-a-GCST90001990	Inflammatory bowel disease	MR Egger	17	-0.110406	0.146037	0.46135	0.895471	0.672578	1.19223	24.6619	0.0546718	NA	NA
CD64 on CD14- CD16+ monocyte || id:ebi-a-GCST90001990	Inflammatory bowel disease	Weighted median	17	-0.00580869	0.0452949	0.897958	0.994208	0.909749	1.08651	NA	NA	NA	NA
HLA DR on CD14+ monocyte || id:ebi-a-GCST90001991	Inflammatory bowel disease	Inverse variance weighted	13	0.101157	0.0411602	0.0139848	1.10645	1.02069	1.19941	39.6872	8.1e-05	-0.0145094	0.583628
HLA DR on CD14+ monocyte || id:ebi-a-GCST90001991	Inflammatory bowel disease	MR Egger	13	0.13763	0.0772525	0.102416	1.14755	0.986309	1.33515	38.5692	6.27e-05	NA	NA
HLA DR on CD14+ monocyte || id:ebi-a-GCST90001991	Inflammatory bowel disease	Weighted median	13	0.0193079	0.0391262	0.621675	1.0195	0.944236	1.10075	NA	NA	NA	NA
CCR2 on CD14+ CD16+ monocyte || id:ebi-a-GCST90001992	Inflammatory bowel disease	Inverse variance weighted	15	0.00186239	0.0396391	0.962526	1.00186	0.926974	1.08281	11.8576	0.617734	0.0189314	0.324745
CCR2 on CD14+ CD16+ monocyte || id:ebi-a-GCST90001992	Inflammatory bowel disease	MR Egger	15	-0.113793	0.119752	0.359322	0.892442	0.705741	1.12854	10.8101	0.626722	NA	NA
CCR2 on CD14+ CD16+ monocyte || id:ebi-a-GCST90001992	Inflammatory bowel disease	Weighted median	15	-0.0107475	0.0560924	0.848053	0.98931	0.88631	1.10428	NA	NA	NA	NA
PDL-1 on CD14+ CD16- monocyte || id:ebi-a-GCST90001993	Inflammatory bowel disease	Inverse variance weighted	9	-0.0221585	0.0574817	0.699876	0.978085	0.873871	1.09473	4.13709	0.844547	-0.0193817	0.605547
PDL-1 on CD14+ CD16- monocyte || id:ebi-a-GCST90001993	Inflammatory bowel disease	MR Egger	9	0.0986293	0.230707	0.681852	1.10366	0.702187	1.73467	3.84484	0.797465	NA	NA
PDL-1 on CD14+ CD16- monocyte || id:ebi-a-GCST90001993	Inflammatory bowel disease	Weighted median	9	-0.0849499	0.072498	0.241295	0.918558	0.796884	1.05881	NA	NA	NA	NA
CX3CR1 on CD14- CD16- || id:ebi-a-GCST90001994	Inflammatory bowel disease	Inverse variance weighted	10	-0.10182	0.134919	0.450441	0.903192	0.693322	1.17659	121.024	8.24e-22	0.0513779	0.462905
CX3CR1 on CD14- CD16- || id:ebi-a-GCST90001994	Inflammatory bowel disease	MR Egger	10	-0.332935	0.330051	0.342633	0.716817	0.375373	1.36884	112.655	1.08e-20	NA	NA
CX3CR1 on CD14- CD16- || id:ebi-a-GCST90001994	Inflammatory bowel disease	Weighted median	10	-0.0154807	0.0539666	0.774221	0.984638	0.885808	1.0945	NA	NA	NA	NA
CX3CR1 on monocyte || id:ebi-a-GCST90001995	Inflammatory bowel disease	Inverse variance weighted	20	0.0814332	0.0414862	0.049658	1.08484	1.00012	1.17674	56.2855	1.47e-05	-0.0498201	0.0208803
CX3CR1 on monocyte || id:ebi-a-GCST90001995	Inflammatory bowel disease	MR Egger	20	0.277795	0.0857622	0.00455307	1.32022	1.11594	1.56188	41.5054	0.00129593	NA	NA
CX3CR1 on monocyte || id:ebi-a-GCST90001995	Inflammatory bowel disease	Weighted median	20	0.0204128	0.0453447	0.652587	1.02062	0.933828	1.11548	NA	NA	NA	NA
CX3CR1 on CD14+ CD16+ monocyte || id:ebi-a-GCST90001996	Inflammatory bowel disease	Inverse variance weighted	19	0.0924961	0.0487517	0.0577896	1.09691	0.996947	1.20689	71.6098	2.41e-08	-0.0699931	0.00780772
CX3CR1 on CD14+ CD16+ monocyte || id:ebi-a-GCST90001996	Inflammatory bowel disease	MR Egger	19	0.352501	0.0952822	0.00177958	1.42262	1.18028	1.71473	46.6642	0.00013705	NA	NA
CX3CR1 on CD14+ CD16+ monocyte || id:ebi-a-GCST90001996	Inflammatory bowel disease	Weighted median	19	0.113597	0.0524926	0.0304597	1.1203	1.01077	1.2417	NA	NA	NA	NA
CX3CR1 on CD14+ CD16- monocyte || id:ebi-a-GCST90001997	Inflammatory bowel disease	Inverse variance weighted	19	0.0873279	0.0407424	0.0320798	1.09125	1.0075	1.18197	58.8971	3.08e-06	-0.0465966	0.0300541
CX3CR1 on CD14+ CD16- monocyte || id:ebi-a-GCST90001997	Inflammatory bowel disease	MR Egger	19	0.262211	0.0823403	0.00542579	1.2998	1.10608	1.52745	44.2964	0.000309677	NA	NA
CX3CR1 on CD14+ CD16- monocyte || id:ebi-a-GCST90001997	Inflammatory bowel disease	Weighted median	19	0.0859996	0.0492701	0.0809028	1.08981	0.989486	1.2003	NA	NA	NA	NA
PDL-1 on CD14+ CD16+ monocyte || id:ebi-a-GCST90001998	Inflammatory bowel disease	Inverse variance weighted	20	-0.0244484	0.0675044	0.717221	0.975848	0.854912	1.11389	76.8132	6.54e-09	-0.0555241	0.262809
PDL-1 on CD14+ CD16+ monocyte || id:ebi-a-GCST90001998	Inflammatory bowel disease	MR Egger	20	0.30215	0.290349	0.311818	1.35276	0.765723	2.38986	71.5049	2.51e-08	NA	NA
PDL-1 on CD14+ CD16+ monocyte || id:ebi-a-GCST90001998	Inflammatory bowel disease	Weighted median	20	0.033795	0.0524711	0.519531	1.03437	0.933282	1.14641	NA	NA	NA	NA
PDL-1 on CD14- CD16+ monocyte || id:ebi-a-GCST90001999	Inflammatory bowel disease	Inverse variance weighted	13	-0.030992	0.033597	0.356287	0.969483	0.907699	1.03547	12.6385	0.395856	-0.0229676	0.213225
PDL-1 on CD14- CD16+ monocyte || id:ebi-a-GCST90001999	Inflammatory bowel disease	MR Egger	13	0.0580918	0.0749491	0.454629	1.05981	0.915021	1.22752	10.8926	0.452301	NA	NA
PDL-1 on CD14- CD16+ monocyte || id:ebi-a-GCST90001999	Inflammatory bowel disease	Weighted median	13	0.00323716	0.0436206	0.940842	1.00324	0.921033	1.09279	NA	NA	NA	NA
PDL-1 on CD14- CD16- || id:ebi-a-GCST90002000	Inflammatory bowel disease	Inverse variance weighted	18	-0.000302901	0.0389697	0.993798	0.999697	0.926183	1.07905	14.4602	0.634298	0.0128629	0.52919
PDL-1 on CD14- CD16- || id:ebi-a-GCST90002000	Inflammatory bowel disease	MR Egger	18	-0.0770879	0.125575	0.547924	0.925808	0.723818	1.18417	14.0465	0.59525	NA	NA
PDL-1 on CD14- CD16- || id:ebi-a-GCST90002000	Inflammatory bowel disease	Weighted median	18	-0.0213588	0.0538747	0.691771	0.978868	0.880775	1.08789	NA	NA	NA	NA
CD64 on CD14- CD16- || id:ebi-a-GCST90002001	Inflammatory bowel disease	Inverse variance weighted	12	-0.197843	0.114211	0.0832258	0.820498	0.655933	1.02635	98.7045	3.22e-16	0.129368	0.0201351
CD64 on CD14- CD16- || id:ebi-a-GCST90002001	Inflammatory bowel disease	MR Egger	12	-0.859312	0.256104	0.00729959	0.423454	0.256334	0.699529	56.0288	2.03e-08	NA	NA
CD64 on CD14- CD16- || id:ebi-a-GCST90002001	Inflammatory bowel disease	Weighted median	12	-0.0976849	0.0612583	0.110793	0.906935	0.804326	1.02263	NA	NA	NA	NA
PDL-1 on monocyte || id:ebi-a-GCST90002002	Inflammatory bowel disease	Inverse variance weighted	10	0.0206134	0.0501894	0.681283	1.02083	0.925188	1.12635	12.0208	0.212138	-0.00980732	0.713208
PDL-1 on monocyte || id:ebi-a-GCST90002002	Inflammatory bowel disease	MR Egger	10	0.0690054	0.137572	0.629461	1.07144	0.818211	1.40305	11.8067	0.160038	NA	NA
PDL-1 on monocyte || id:ebi-a-GCST90002002	Inflammatory bowel disease	Weighted median	10	0.00355894	0.0629431	0.95491	1.00357	0.887089	1.13533	NA	NA	NA	NA
CCR2 on CD14- CD16- || id:ebi-a-GCST90002003	Inflammatory bowel disease	Inverse variance weighted	9	0.0376479	0.0582248	0.517894	1.03837	0.926378	1.16389	11.2845	0.186096	0.0172888	0.670124
CCR2 on CD14- CD16- || id:ebi-a-GCST90002003	Inflammatory bowel disease	MR Egger	9	-0.0651527	0.239298	0.793274	0.936924	0.586151	1.49761	10.9748	0.139724	NA	NA
CCR2 on CD14- CD16- || id:ebi-a-GCST90002003	Inflammatory bowel disease	Weighted median	9	0.00900096	0.0720971	0.900646	1.00904	0.87607	1.1622	NA	NA	NA	NA
CCR2 on CD14+ CD16- monocyte || id:ebi-a-GCST90002004	Inflammatory bowel disease	Inverse variance weighted	15	0.0495544	0.0399946	0.215335	1.0508	0.971577	1.13649	20.9165	0.103791	-0.0114671	0.582116
CCR2 on CD14+ CD16- monocyte || id:ebi-a-GCST90002004	Inflammatory bowel disease	MR Egger	15	0.111909	0.117851	0.359645	1.11841	0.887738	1.40902	20.4163	0.0853046	NA	NA
CCR2 on CD14+ CD16- monocyte || id:ebi-a-GCST90002004	Inflammatory bowel disease	Weighted median	15	0.106223	0.0472514	0.024573	1.11207	1.0137	1.21998	NA	NA	NA	NA
CD16 on CD14+ CD16+ monocyte || id:ebi-a-GCST90002005	Inflammatory bowel disease	Inverse variance weighted	18	-0.0221047	0.0246548	0.369951	0.978138	0.931995	1.02657	9.38494	0.927406	-0.0177556	0.0984907
CD16 on CD14+ CD16+ monocyte || id:ebi-a-GCST90002005	Inflammatory bowel disease	MR Egger	18	0.033634	0.040215	0.415272	1.03421	0.955818	1.11902	6.30703	0.984427	NA	NA
CD16 on CD14+ CD16+ monocyte || id:ebi-a-GCST90002005	Inflammatory bowel disease	Weighted median	18	0.0126701	0.0309833	0.682589	1.01275	0.953079	1.07616	NA	NA	NA	NA
CD64 on monocyte || id:ebi-a-GCST90002006	Inflammatory bowel disease	Inverse variance weighted	16	-0.0851867	0.0561961	0.129549	0.918341	0.822562	1.02527	75.4776	4.64e-10	0.0657372	0.0105955
CD64 on monocyte || id:ebi-a-GCST90002006	Inflammatory bowel disease	MR Egger	16	-0.312025	0.0894993	0.00363247	0.731963	0.614194	0.872313	46.5736	2.26e-05	NA	NA
CD64 on monocyte || id:ebi-a-GCST90002006	Inflammatory bowel disease	Weighted median	16	-0.0527903	0.0445039	0.235545	0.948579	0.869343	1.03504	NA	NA	NA	NA
HLA DR on CD14+ CD16+ monocyte || id:ebi-a-GCST90002007	Inflammatory bowel disease	Inverse variance weighted	8	-0.0238967	0.050246	0.634363	0.976387	0.884813	1.07744	1.87569	0.966399	-0.00398845	0.890297
HLA DR on CD14+ CD16+ monocyte || id:ebi-a-GCST90002007	Inflammatory bowel disease	MR Egger	8	-0.00415543	0.146107	0.978233	0.995853	0.747871	1.32606	1.85498	0.932541	NA	NA
HLA DR on CD14+ CD16+ monocyte || id:ebi-a-GCST90002007	Inflammatory bowel disease	Weighted median	8	-0.0493895	0.0656314	0.451733	0.95181	0.83692	1.08247	NA	NA	NA	NA
CCR2 on monocyte || id:ebi-a-GCST90002008	Inflammatory bowel disease	Inverse variance weighted	11	0.0330798	0.0561234	0.555585	1.03363	0.925962	1.15382	17.1837	0.0703959	-0.0428539	0.196222
CCR2 on monocyte || id:ebi-a-GCST90002008	Inflammatory bowel disease	MR Egger	11	0.251814	0.165624	0.162735	1.28636	0.929778	1.77969	14.1255	0.117929	NA	NA
CCR2 on monocyte || id:ebi-a-GCST90002008	Inflammatory bowel disease	Weighted median	11	0.109708	0.060416	0.0693883	1.11595	0.991331	1.25624	NA	NA	NA	NA
HLA DR on CD14- CD16- || id:ebi-a-GCST90002009	Inflammatory bowel disease	Inverse variance weighted	12	-0.180443	0.0618514	0.00352997	0.8349	0.739581	0.942504	65.0162	1.07e-09	0.0737651	0.000387151
HLA DR on CD14- CD16- || id:ebi-a-GCST90002009	Inflammatory bowel disease	MR Egger	12	-0.384432	0.0515023	2.15e-05	0.680837	0.615466	0.753153	17.431	0.0653549	NA	NA
HLA DR on CD14- CD16- || id:ebi-a-GCST90002009	Inflammatory bowel disease	Weighted median	12	-0.2244	0.0447138	5.21e-07	0.798996	0.731953	0.872179	NA	NA	NA	NA
HLA DR on monocyte || id:ebi-a-GCST90002010	Inflammatory bowel disease	Inverse variance weighted	10	0.112459	0.0575971	0.0508779	1.11903	0.999569	1.25276	47.9246	2.64e-07	-0.0194923	0.609256
HLA DR on monocyte || id:ebi-a-GCST90002010	Inflammatory bowel disease	MR Egger	10	0.163638	0.113417	0.187063	1.17779	0.943027	1.47099	46.2877	2.1e-07	NA	NA
HLA DR on monocyte || id:ebi-a-GCST90002010	Inflammatory bowel disease	Weighted median	10	0.0135071	0.0483809	0.780105	1.0136	0.921899	1.11442	NA	NA	NA	NA
CD64 on CD14+ CD16+ monocyte || id:ebi-a-GCST90002011	Inflammatory bowel disease	Inverse variance weighted	7	0.108059	0.0783996	0.168106	1.11411	0.95542	1.29917	13.4461	0.0364738	0.0356635	0.429643
CD64 on CD14+ CD16+ monocyte || id:ebi-a-GCST90002011	Inflammatory bowel disease	MR Egger	7	-0.112644	0.269179	0.692969	0.893469	0.527169	1.51429	11.7174	0.0388727	NA	NA
CD64 on CD14+ CD16+ monocyte || id:ebi-a-GCST90002011	Inflammatory bowel disease	Weighted median	7	0.0530718	0.0752943	0.480898	1.05451	0.909823	1.2222	NA	NA	NA	NA
CX3CR1 on CD14- CD16+ monocyte || id:ebi-a-GCST90002012	Inflammatory bowel disease	Inverse variance weighted	18	0.0968441	0.0688581	0.159597	1.10169	0.9626	1.26088	67.8209	5.1e-08	-0.0829346	0.0321156
CX3CR1 on CD14- CD16+ monocyte || id:ebi-a-GCST90002012	Inflammatory bowel disease	MR Egger	18	0.605469	0.225179	0.0161366	1.83211	1.17835	2.84858	50.4498	1.94e-05	NA	NA
CX3CR1 on CD14- CD16+ monocyte || id:ebi-a-GCST90002012	Inflammatory bowel disease	Weighted median	18	0.101735	0.0583744	0.0813667	1.10709	0.987402	1.24129	NA	NA	NA	NA
CCR2 on myeloid Dendritic Cell || id:ebi-a-GCST90002013	Inflammatory bowel disease	Inverse variance weighted	8	0.0346322	0.037536	0.356195	1.03524	0.96181	1.11427	6.08968	0.529318	0.000826014	0.967014
CCR2 on myeloid Dendritic Cell || id:ebi-a-GCST90002013	Inflammatory bowel disease	MR Egger	8	0.0315086	0.0817303	0.71315	1.03201	0.879253	1.21131	6.0878	0.413427	NA	NA
CCR2 on myeloid Dendritic Cell || id:ebi-a-GCST90002013	Inflammatory bowel disease	Weighted median	8	0.0269147	0.0496186	0.587521	1.02728	0.932079	1.13221	NA	NA	NA	NA
CCR2 on CD62L+ myeloid Dendritic Cell || id:ebi-a-GCST90002014	Inflammatory bowel disease	Inverse variance weighted	10	-0.0276148	0.0468322	0.555422	0.972763	0.887447	1.06628	18.0115	0.0350398	0.0168275	0.515989
CCR2 on CD62L+ myeloid Dendritic Cell || id:ebi-a-GCST90002014	Inflammatory bowel disease	MR Egger	10	-0.0972639	0.113308	0.415647	0.907317	0.726623	1.13294	17.0287	0.0298116	NA	NA
CCR2 on CD62L+ myeloid Dendritic Cell || id:ebi-a-GCST90002014	Inflammatory bowel disease	Weighted median	10	-0.0265117	0.0517659	0.608549	0.973837	0.879877	1.07783	NA	NA	NA	NA
CCR2 on plasmacytoid Dendritic Cell || id:ebi-a-GCST90002015	Inflammatory bowel disease	Inverse variance weighted	15	0.0391077	0.031284	0.211268	1.03988	0.978036	1.10564	18.2577	0.195296	-0.0338459	0.0162438
CCR2 on plasmacytoid Dendritic Cell || id:ebi-a-GCST90002015	Inflammatory bowel disease	MR Egger	15	0.190682	0.0613827	0.00834247	1.21008	1.07291	1.36478	10.6434	0.640659	NA	NA
CCR2 on plasmacytoid Dendritic Cell || id:ebi-a-GCST90002015	Inflammatory bowel disease	Weighted median	15	0.0647614	0.0393108	0.0994716	1.0669	0.987787	1.15236	NA	NA	NA	NA
CCR2 on CD62L+ plasmacytoid Dendritic Cell || id:ebi-a-GCST90002016	Inflammatory bowel disease	Inverse variance weighted	14	0.0390406	0.0331174	0.238456	1.03981	0.974462	1.10955	18.2415	0.148564	-0.0371428	0.0132446
CCR2 on CD62L+ plasmacytoid Dendritic Cell || id:ebi-a-GCST90002016	Inflammatory bowel disease	MR Egger	14	0.201151	0.0624446	0.00733713	1.22281	1.08194	1.38201	9.81228	0.632425	NA	NA
CCR2 on CD62L+ plasmacytoid Dendritic Cell || id:ebi-a-GCST90002016	Inflammatory bowel disease	Weighted median	14	0.0695158	0.0401626	0.0834764	1.07199	0.990839	1.15978	NA	NA	NA	NA
CCR2 on monocyte || id:ebi-a-GCST90002017	Inflammatory bowel disease	Inverse variance weighted	11	-0.0212467	0.0815729	0.794507	0.978977	0.834327	1.14871	69.6049	5.28e-11	0.0389343	0.524955
CCR2 on monocyte || id:ebi-a-GCST90002017	Inflammatory bowel disease	MR Egger	11	-0.190445	0.269265	0.497298	0.826591	0.487627	1.40118	66.379	7.77e-11	NA	NA
CCR2 on monocyte || id:ebi-a-GCST90002017	Inflammatory bowel disease	Weighted median	11	0.0797293	0.0459277	0.0825685	1.08299	0.989764	1.18501	NA	NA	NA	NA
CCR2 on granulocyte || id:ebi-a-GCST90002018	Inflammatory bowel disease	Inverse variance weighted	12	-0.0651428	0.0512339	0.203559	0.936934	0.847418	1.03591	18.4209	0.0723135	0.0834265	0.0113943
CCR2 on granulocyte || id:ebi-a-GCST90002018	Inflammatory bowel disease	MR Egger	12	-0.511132	0.14955	0.00657155	0.599816	0.447424	0.804114	8.85704	0.545723	NA	NA
CCR2 on granulocyte || id:ebi-a-GCST90002018	Inflammatory bowel disease	Weighted median	12	-0.0687839	0.0614214	0.262769	0.933528	0.827646	1.05296	NA	NA	NA	NA
CD14 on Monocytic Myeloid-Derived Suppressor Cells || id:ebi-a-GCST90002019	Inflammatory bowel disease	Inverse variance weighted	18	0.0208917	0.0226684	0.356726	1.02111	0.976736	1.0675	12.7518	0.752639	-0.0278937	0.17442
CD14 on Monocytic Myeloid-Derived Suppressor Cells || id:ebi-a-GCST90002019	Inflammatory bowel disease	MR Egger	18	0.122523	0.075012	0.121909	1.13035	0.975797	1.30937	10.7316	0.825741	NA	NA
CD14 on Monocytic Myeloid-Derived Suppressor Cells || id:ebi-a-GCST90002019	Inflammatory bowel disease	Weighted median	18	0.063609	0.0308947	0.0395039	1.06568	1.00306	1.1322	NA	NA	NA	NA
CD14 on CD33+ HLA DR+ CD14dim || id:ebi-a-GCST90002020	Inflammatory bowel disease	Inverse variance weighted	13	-0.0186534	0.0619104	0.763188	0.981519	0.86936	1.10815	53.4298	3.45e-07	-0.0475256	0.388584
CD14 on CD33+ HLA DR+ CD14dim || id:ebi-a-GCST90002020	Inflammatory bowel disease	MR Egger	13	0.178667	0.228503	0.450774	1.19562	0.763991	1.87111	49.7829	6.85e-07	NA	NA
CD14 on CD33+ HLA DR+ CD14dim || id:ebi-a-GCST90002020	Inflammatory bowel disease	Weighted median	13	-0.0282222	0.0459973	0.539505	0.972172	0.888361	1.06389	NA	NA	NA	NA
CD14 on CD33dim HLA DR+ CD11b+ || id:ebi-a-GCST90002021	Inflammatory bowel disease	Inverse variance weighted	12	0.116681	0.0528755	0.0273349	1.12376	1.01313	1.24647	43.0588	1.06e-05	-0.0486525	0.347247
CD14 on CD33dim HLA DR+ CD11b+ || id:ebi-a-GCST90002021	Inflammatory bowel disease	MR Egger	12	0.301861	0.195074	0.1528	1.35237	0.922671	1.9822	39.2415	2.3e-05	NA	NA
CD14 on CD33dim HLA DR+ CD11b+ || id:ebi-a-GCST90002021	Inflammatory bowel disease	Weighted median	12	0.019953	0.044412	0.653236	1.02015	0.935107	1.11293	NA	NA	NA	NA
CD4 on CD4+ T cell || id:ebi-a-GCST90002022	Inflammatory bowel disease	Inverse variance weighted	18	-0.0257996	0.0258692	0.318614	0.97453	0.92635	1.02522	16.2097	0.509019	0.0121623	0.429008
CD4 on CD4+ T cell || id:ebi-a-GCST90002022	Inflammatory bowel disease	MR Egger	18	-0.084045	0.0762977	0.286957	0.91939	0.791687	1.06769	15.5513	0.484694	NA	NA
CD4 on CD4+ T cell || id:ebi-a-GCST90002022	Inflammatory bowel disease	Weighted median	18	-0.00686926	0.0367873	0.851873	0.993154	0.924066	1.06741	NA	NA	NA	NA
CD4 on Central Memory CD4+ T cell || id:ebi-a-GCST90002023	Inflammatory bowel disease	Inverse variance weighted	11	-0.00275005	0.0329789	0.933543	0.997254	0.934832	1.06384	10.7713	0.375609	0.0148561	0.516682
CD4 on Central Memory CD4+ T cell || id:ebi-a-GCST90002023	Inflammatory bowel disease	MR Egger	11	-0.0735132	0.110194	0.521428	0.929124	0.748642	1.15312	10.2524	0.330441	NA	NA
CD4 on Central Memory CD4+ T cell || id:ebi-a-GCST90002023	Inflammatory bowel disease	Weighted median	11	0.0278144	0.046302	0.548029	1.0282	0.939002	1.12588	NA	NA	NA	NA
CD4 on naive CD4+ T cell || id:ebi-a-GCST90002024	Inflammatory bowel disease	Inverse variance weighted	13	0.0390373	0.0529775	0.461204	1.03981	0.937256	1.15358	30.4675	0.00237351	0.0301585	0.427822
CD4 on naive CD4+ T cell || id:ebi-a-GCST90002024	Inflammatory bowel disease	MR Egger	13	-0.12444	0.205696	0.557472	0.882991	0.590017	1.32144	28.699	0.00252712	NA	NA
CD4 on naive CD4+ T cell || id:ebi-a-GCST90002024	Inflammatory bowel disease	Weighted median	13	0.0138453	0.0501959	0.782681	1.01394	0.918936	1.11877	NA	NA	NA	NA
CD4 on Effector Memory CD4+ T cell || id:ebi-a-GCST90002025	Inflammatory bowel disease	Inverse variance weighted	14	0.0861512	0.0401776	0.0320122	1.08997	1.00743	1.17927	21.731	0.0596719	0.0205654	0.34991
CD4 on Effector Memory CD4+ T cell || id:ebi-a-GCST90002025	Inflammatory bowel disease	MR Egger	14	-0.0228642	0.119089	0.850958	0.977395	0.773926	1.23436	20.1429	0.0644305	NA	NA
CD4 on Effector Memory CD4+ T cell || id:ebi-a-GCST90002025	Inflammatory bowel disease	Weighted median	14	0.0437531	0.0456197	0.337517	1.04472	0.955365	1.14244	NA	NA	NA	NA
CD4 on Terminally Differentiated CD4+ T cell || id:ebi-a-GCST90002026	Inflammatory bowel disease	Inverse variance weighted	19	-0.0179782	0.0307598	0.558903	0.982182	0.924717	1.04322	13.9187	0.734377	0.00420096	0.817724
CD4 on Terminally Differentiated CD4+ T cell || id:ebi-a-GCST90002026	Inflammatory bowel disease	MR Egger	19	-0.0419343	0.106867	0.699642	0.958933	0.777716	1.18238	13.8639	0.676713	NA	NA
CD4 on Terminally Differentiated CD4+ T cell || id:ebi-a-GCST90002026	Inflammatory bowel disease	Weighted median	19	-0.0155308	0.042042	0.711821	0.984589	0.90671	1.06916	NA	NA	NA	NA
CD4 on CD45RA+ CD4+ T cell || id:ebi-a-GCST90002027	Inflammatory bowel disease	Inverse variance weighted	16	-0.0230685	0.0278356	0.40725	0.977196	0.92531	1.03199	14.077	0.519699	0.00132015	0.936227
CD4 on CD45RA+ CD4+ T cell || id:ebi-a-GCST90002027	Inflammatory bowel disease	MR Egger	16	-0.0292167	0.0804659	0.721958	0.971206	0.829502	1.13712	14.0703	0.444486	NA	NA
CD4 on CD45RA+ CD4+ T cell || id:ebi-a-GCST90002027	Inflammatory bowel disease	Weighted median	16	-0.0156224	0.0388995	0.687972	0.984499	0.912228	1.0625	NA	NA	NA	NA
CD19 on B cell || id:ebi-a-GCST90002028	Inflammatory bowel disease	Inverse variance weighted	15	-0.180377	0.104829	0.0853097	0.834956	0.679879	1.02541	108.976	8.84e-17	0.00699353	0.91446
CD19 on B cell || id:ebi-a-GCST90002028	Inflammatory bowel disease	MR Egger	15	-0.224098	0.413747	0.597233	0.799236	0.355211	1.79831	108.876	3.1e-17	NA	NA
CD19 on B cell || id:ebi-a-GCST90002028	Inflammatory bowel disease	Weighted median	15	-0.0890661	0.0713078	0.211651	0.914785	0.795464	1.052	NA	NA	NA	NA
CD39 on CD39+ CD8+ T cell || id:ebi-a-GCST90002029	Inflammatory bowel disease	Inverse variance weighted	20	-0.00392643	0.0328107	0.904745	0.996081	0.934041	1.06224	18.4562	0.492184	0.00674131	0.766067
CD39 on CD39+ CD8+ T cell || id:ebi-a-GCST90002029	Inflammatory bowel disease	MR Egger	20	-0.0389989	0.120747	0.750431	0.961752	0.759069	1.21855	18.3631	0.431984	NA	NA
CD39 on CD39+ CD8+ T cell || id:ebi-a-GCST90002029	Inflammatory bowel disease	Weighted median	20	-0.0227653	0.0458525	0.619548	0.977492	0.893476	1.06941	NA	NA	NA	NA
CD39 on CD39+ activated CD4 regulatory T cell || id:ebi-a-GCST90002030	Inflammatory bowel disease	Inverse variance weighted	15	0.00397189	0.0401122	0.921123	1.00398	0.92807	1.0861	97.7749	1.26e-14	0.0475087	0.0645111
CD39 on CD39+ activated CD4 regulatory T cell || id:ebi-a-GCST90002030	Inflammatory bowel disease	MR Egger	15	-0.0842753	0.056814	0.161815	0.919178	0.822316	1.02745	74.421	1.22e-10	NA	NA
CD39 on CD39+ activated CD4 regulatory T cell || id:ebi-a-GCST90002030	Inflammatory bowel disease	Weighted median	15	-0.010458	0.017662	0.553771	0.989596	0.955925	1.02445	NA	NA	NA	NA
CD39 on CD39+ secreting CD4 regulatory T cell || id:ebi-a-GCST90002031	Inflammatory bowel disease	Inverse variance weighted	15	0.0165091	0.0261881	0.528431	1.01665	0.96578	1.07019	12.5238	0.564318	0.0300293	0.0650503
CD39 on CD39+ secreting CD4 regulatory T cell || id:ebi-a-GCST90002031	Inflammatory bowel disease	MR Egger	15	-0.108033	0.0671226	0.131513	0.897598	0.786948	1.02381	8.46295	0.812188	NA	NA
CD39 on CD39+ secreting CD4 regulatory T cell || id:ebi-a-GCST90002031	Inflammatory bowel disease	Weighted median	15	-0.0308536	0.0374135	0.409561	0.969618	0.90106	1.04339	NA	NA	NA	NA
CD39 on CD39+ CD4+ T cell || id:ebi-a-GCST90002032	Inflammatory bowel disease	Inverse variance weighted	18	-0.0104848	0.0294782	0.722082	0.98957	0.934016	1.04843	25.3865	0.0863875	-0.0101935	0.576976
CD39 on CD39+ CD4+ T cell || id:ebi-a-GCST90002032	Inflammatory bowel disease	MR Egger	18	0.034093	0.0838665	0.68975	1.03468	0.877845	1.21954	24.8822	0.0719288	NA	NA
CD39 on CD39+ CD4+ T cell || id:ebi-a-GCST90002032	Inflammatory bowel disease	Weighted median	18	0.0255441	0.0356091	0.473159	1.02587	0.956715	1.10003	NA	NA	NA	NA
CD39 on granulocyte || id:ebi-a-GCST90002033	Inflammatory bowel disease	Inverse variance weighted	20	-0.00110138	0.0293545	0.97007	0.998899	0.94305	1.05806	20.3905	0.371436	-0.00259716	0.910282
CD39 on granulocyte || id:ebi-a-GCST90002033	Inflammatory bowel disease	MR Egger	20	0.0120157	0.118675	0.920472	1.01209	0.802048	1.27713	20.3757	0.312072	NA	NA
CD39 on granulocyte || id:ebi-a-GCST90002033	Inflammatory bowel disease	Weighted median	20	-0.00671834	0.0375465	0.85799	0.993304	0.922831	1.06916	NA	NA	NA	NA
CD39 on monocyte || id:ebi-a-GCST90002034	Inflammatory bowel disease	Inverse variance weighted	10	0.0144568	0.0404408	0.720732	1.01456	0.937248	1.09825	5.36911	0.801018	0.0139256	0.654882
CD39 on monocyte || id:ebi-a-GCST90002034	Inflammatory bowel disease	MR Egger	10	-0.0617315	0.169041	0.724438	0.940135	0.674994	1.30942	5.15364	0.741036	NA	NA
CD39 on monocyte || id:ebi-a-GCST90002034	Inflammatory bowel disease	Weighted median	10	0.0178756	0.0516355	0.729201	1.01804	0.920048	1.12646	NA	NA	NA	NA
CD80 on myeloid Dendritic Cell || id:ebi-a-GCST90002035	Inflammatory bowel disease	Inverse variance weighted	21	-0.106928	0.0355377	0.00262237	0.898591	0.83813	0.963412	29.3878	0.0803999	-0.00794343	0.672762
CD80 on myeloid Dendritic Cell || id:ebi-a-GCST90002035	Inflammatory bowel disease	MR Egger	21	-0.0657265	0.10267	0.529706	0.936387	0.765704	1.14512	29.1059	0.0643379	NA	NA
CD80 on myeloid Dendritic Cell || id:ebi-a-GCST90002035	Inflammatory bowel disease	Weighted median	21	-0.0734088	0.0458941	0.109704	0.929221	0.849284	1.01668	NA	NA	NA	NA
CD80 on CD62L+ myeloid Dendritic Cell || id:ebi-a-GCST90002036	Inflammatory bowel disease	Inverse variance weighted	15	-0.0466138	0.0457753	0.308528	0.954456	0.872552	1.04405	23.526	0.0522309	0.0129437	0.556136
CD80 on CD62L+ myeloid Dendritic Cell || id:ebi-a-GCST90002036	Inflammatory bowel disease	MR Egger	15	-0.113619	0.120396	0.362528	0.892598	0.704973	1.13016	22.8835	0.0430957	NA	NA
CD80 on CD62L+ myeloid Dendritic Cell || id:ebi-a-GCST90002036	Inflammatory bowel disease	Weighted median	15	-0.0284338	0.0535046	0.595123	0.971967	0.8752	1.07943	NA	NA	NA	NA
CD80 on plasmacytoid Dendritic Cell || id:ebi-a-GCST90002037	Inflammatory bowel disease	Inverse variance weighted	15	-0.0739833	0.0376697	0.0495298	0.928687	0.86259	0.999849	21.107	0.0989226	0.00266936	0.91154
CD80 on plasmacytoid Dendritic Cell || id:ebi-a-GCST90002037	Inflammatory bowel disease	MR Egger	15	-0.0880051	0.129801	0.509659	0.915756	0.710054	1.18105	21.0862	0.071242	NA	NA
CD80 on plasmacytoid Dendritic Cell || id:ebi-a-GCST90002037	Inflammatory bowel disease	Weighted median	15	-0.075722	0.0457782	0.0981063	0.927074	0.847515	1.0141	NA	NA	NA	NA
CD80 on CD62L+ plasmacytoid Dendritic Cell || id:ebi-a-GCST90002038	Inflammatory bowel disease	Inverse variance weighted	15	-0.0742948	0.0378184	0.0494704	0.928398	0.86207	0.999829	21.1046	0.0989822	0.00290651	0.904717
CD80 on CD62L+ plasmacytoid Dendritic Cell || id:ebi-a-GCST90002038	Inflammatory bowel disease	MR Egger	15	-0.0896394	0.131689	0.508009	0.914261	0.706276	1.18349	21.0804	0.071353	NA	NA
CD80 on CD62L+ plasmacytoid Dendritic Cell || id:ebi-a-GCST90002038	Inflammatory bowel disease	Weighted median	15	-0.0753403	0.0442381	0.0885558	0.927428	0.850401	1.01143	NA	NA	NA	NA
CD80 on monocyte || id:ebi-a-GCST90002039	Inflammatory bowel disease	Inverse variance weighted	17	0.0326084	0.0293084	0.265883	1.03315	0.97547	1.09423	13.4984	0.636024	0.00591191	0.622648
CD80 on monocyte || id:ebi-a-GCST90002039	Inflammatory bowel disease	MR Egger	17	0.00946664	0.0545923	0.864651	1.00951	0.907071	1.12352	13.246	0.583305	NA	NA
CD80 on monocyte || id:ebi-a-GCST90002039	Inflammatory bowel disease	Weighted median	17	0.0286176	0.0393351	0.466899	1.02903	0.952677	1.1115	NA	NA	NA	NA
CD80 on granulocyte || id:ebi-a-GCST90002040	Inflammatory bowel disease	Inverse variance weighted	22	-0.0281516	0.0285357	0.323867	0.972241	0.919356	1.02817	23.4435	0.320797	-0.0002755	0.989635
CD80 on granulocyte || id:ebi-a-GCST90002040	Inflammatory bowel disease	MR Egger	22	-0.0266117	0.120664	0.827683	0.973739	0.768655	1.23354	23.4433	0.267557	NA	NA
CD80 on granulocyte || id:ebi-a-GCST90002040	Inflammatory bowel disease	Weighted median	22	-0.0148329	0.0372752	0.690682	0.985277	0.91586	1.05996	NA	NA	NA	NA
CD45 on lymphocyte || id:ebi-a-GCST90002041	Inflammatory bowel disease	Inverse variance weighted	15	-0.0213847	0.0336414	0.524994	0.978842	0.916382	1.04556	16.9608	0.258271	-0.0171634	0.512703
CD45 on lymphocyte || id:ebi-a-GCST90002041	Inflammatory bowel disease	MR Egger	15	0.0528301	0.115484	0.654886	1.05425	0.840702	1.32204	16.3897	0.228724	NA	NA
CD45 on lymphocyte || id:ebi-a-GCST90002041	Inflammatory bowel disease	Weighted median	15	-0.0252563	0.0427818	0.554955	0.97506	0.896633	1.06035	NA	NA	NA	NA
CD45 on CD33+ HLA DR+ CD14- || id:ebi-a-GCST90002042	Inflammatory bowel disease	Inverse variance weighted	15	0.0236537	0.0263605	0.36955	1.02394	0.972376	1.07823	15.346	0.354921	-0.00540754	0.831567
CD45 on CD33+ HLA DR+ CD14- || id:ebi-a-GCST90002042	Inflammatory bowel disease	MR Egger	15	0.0472035	0.1119	0.680038	1.04834	0.841877	1.30542	15.2906	0.289566	NA	NA
CD45 on CD33+ HLA DR+ CD14- || id:ebi-a-GCST90002042	Inflammatory bowel disease	Weighted median	15	0.0510996	0.0355589	0.150706	1.05243	0.981576	1.12839	NA	NA	NA	NA
CD45 on CD33+ HLA DR+ CD14dim || id:ebi-a-GCST90002043	Inflammatory bowel disease	Inverse variance weighted	9	0.0251879	0.0355209	0.478262	1.02551	0.95654	1.09945	9.26569	0.320381	0.032556	0.49647
CD45 on CD33+ HLA DR+ CD14dim || id:ebi-a-GCST90002043	Inflammatory bowel disease	MR Egger	9	-0.137613	0.22993	0.568359	0.871436	0.555284	1.36759	8.63141	0.280214	NA	NA
CD45 on CD33+ HLA DR+ CD14dim || id:ebi-a-GCST90002043	Inflammatory bowel disease	Weighted median	9	-0.0152297	0.0455597	0.738169	0.984886	0.900751	1.07688	NA	NA	NA	NA
CD45 on CD33dim HLA DR+ CD11b- || id:ebi-a-GCST90002044	Inflammatory bowel disease	Inverse variance weighted	9	0.0633781	0.0516046	0.219391	1.06543	0.962937	1.17883	16.3826	0.0372198	-0.015462	0.852123
CD45 on CD33dim HLA DR+ CD11b- || id:ebi-a-GCST90002044	Inflammatory bowel disease	MR Egger	9	0.144683	0.42394	0.742906	1.15567	0.503466	2.65277	16.2955	0.0225493	NA	NA
CD45 on CD33dim HLA DR+ CD11b- || id:ebi-a-GCST90002044	Inflammatory bowel disease	Weighted median	9	0.0594477	0.0554635	0.283795	1.06125	0.951933	1.18312	NA	NA	NA	NA
CD45 on CD33- HLA DR- || id:ebi-a-GCST90002045	Inflammatory bowel disease	Inverse variance weighted	10	0.0343174	0.0368343	0.351508	1.03491	0.962831	1.11239	10.8017	0.289547	0.0434823	0.200229
CD45 on CD33- HLA DR- || id:ebi-a-GCST90002045	Inflammatory bowel disease	MR Egger	10	-0.131745	0.124005	0.319064	0.876565	0.687431	1.11774	8.68575	0.369495	NA	NA
CD45 on CD33- HLA DR- || id:ebi-a-GCST90002045	Inflammatory bowel disease	Weighted median	10	0.0204371	0.0476659	0.668099	1.02065	0.929612	1.1206	NA	NA	NA	NA
CD45 on CD33- HLA DR+ || id:ebi-a-GCST90002046	Inflammatory bowel disease	Inverse variance weighted	14	-0.0467595	0.0361318	0.195619	0.954317	0.889071	1.02435	25.699	0.0186534	0.0126501	0.729407
CD45 on CD33- HLA DR+ || id:ebi-a-GCST90002046	Inflammatory bowel disease	MR Egger	14	-0.100212	0.155521	0.531462	0.904645	0.666955	1.22704	25.4332	0.0128982	NA	NA
CD45 on CD33- HLA DR+ || id:ebi-a-GCST90002046	Inflammatory bowel disease	Weighted median	14	-0.0413008	0.0385591	0.284123	0.95954	0.889695	1.03487	NA	NA	NA	NA
CD45 on Granulocytic Myeloid-Derived Suppressor Cells || id:ebi-a-GCST90002047	Inflammatory bowel disease	Inverse variance weighted	16	-0.039993	0.0267269	0.13456	0.960796	0.911761	1.01247	18.3818	0.243126	-0.00458212	0.86498
CD45 on Granulocytic Myeloid-Derived Suppressor Cells || id:ebi-a-GCST90002047	Inflammatory bowel disease	MR Egger	16	-0.0233826	0.0998099	0.818166	0.976889	0.803314	1.18797	18.3425	0.191624	NA	NA
CD45 on Granulocytic Myeloid-Derived Suppressor Cells || id:ebi-a-GCST90002047	Inflammatory bowel disease	Weighted median	16	-0.0188074	0.0345715	0.586431	0.981368	0.917074	1.05017	NA	NA	NA	NA
CD45 on CD66b++ myelod cell || id:ebi-a-GCST90002048	Inflammatory bowel disease	Inverse variance weighted	12	-0.0623133	0.0367636	0.0900809	0.939588	0.874267	1.00979	8.07334	0.70672	0.0486632	0.13179
CD45 on CD66b++ myelod cell || id:ebi-a-GCST90002048	Inflammatory bowel disease	MR Egger	12	-0.262474	0.127381	0.0663264	0.769146	0.599212	0.987274	5.37981	0.864406	NA	NA
CD45 on CD66b++ myelod cell || id:ebi-a-GCST90002048	Inflammatory bowel disease	Weighted median	12	-0.0276081	0.0494246	0.576441	0.97277	0.882956	1.07172	NA	NA	NA	NA
CD45 on Monocytic Myeloid-Derived Suppressor Cells || id:ebi-a-GCST90002049	Inflammatory bowel disease	Inverse variance weighted	8	0.100462	0.0341296	0.00324462	1.10568	1.03414	1.18218	4.48212	0.72287	-0.0152974	0.719141
CD45 on Monocytic Myeloid-Derived Suppressor Cells || id:ebi-a-GCST90002049	Inflammatory bowel disease	MR Egger	8	0.160809	0.163665	0.363773	1.17446	0.852166	1.61865	4.33998	0.630771	NA	NA
CD45 on Monocytic Myeloid-Derived Suppressor Cells || id:ebi-a-GCST90002049	Inflammatory bowel disease	Weighted median	8	0.0933582	0.0450502	0.0382361	1.09785	1.00507	1.1992	NA	NA	NA	NA
CD45 on CD33dim HLA DR- || id:ebi-a-GCST90002050	Inflammatory bowel disease	Inverse variance weighted	12	-0.0570927	0.0323187	0.0773027	0.944506	0.886533	1.00627	6.25367	0.855914	0.0191325	0.597484
CD45 on CD33dim HLA DR- || id:ebi-a-GCST90002050	Inflammatory bowel disease	MR Egger	12	-0.133499	0.143791	0.375054	0.875029	0.660124	1.1599	5.95629	0.818922	NA	NA
CD45 on CD33dim HLA DR- || id:ebi-a-GCST90002050	Inflammatory bowel disease	Weighted median	12	-0.0423443	0.0424897	0.318968	0.95854	0.881946	1.04178	NA	NA	NA	NA
CD45 on basophil || id:ebi-a-GCST90002051	Inflammatory bowel disease	Inverse variance weighted	14	-0.041046	0.025641	0.109422	0.959785	0.912742	1.00925	12.8763	0.457415	-0.0141874	0.51992
CD45 on basophil || id:ebi-a-GCST90002051	Inflammatory bowel disease	MR Egger	14	0.0105694	0.0821161	0.899717	1.01063	0.860383	1.1871	12.4214	0.412459	NA	NA
CD45 on basophil || id:ebi-a-GCST90002051	Inflammatory bowel disease	Weighted median	14	0.00577153	0.0381468	0.879741	1.00579	0.93333	1.08387	NA	NA	NA	NA
CD45 on Immature Myeloid-Derived Suppressor Cells || id:ebi-a-GCST90002052	Inflammatory bowel disease	Inverse variance weighted	6	0.014533	0.0299097	0.627039	1.01464	0.956868	1.0759	6.55175	0.256167	0.0172278	0.519437
CD45 on Immature Myeloid-Derived Suppressor Cells || id:ebi-a-GCST90002052	Inflammatory bowel disease	MR Egger	6	-0.0293743	0.0697723	0.69539	0.971053	0.846938	1.11336	5.82678	0.212463	NA	NA
CD45 on Immature Myeloid-Derived Suppressor Cells || id:ebi-a-GCST90002052	Inflammatory bowel disease	Weighted median	6	-0.0023234	0.0291075	0.936379	0.997679	0.942354	1.05625	NA	NA	NA	NA
CD45 on CD33+ HLA DR+ || id:ebi-a-GCST90002053	Inflammatory bowel disease	Inverse variance weighted	11	-0.048384	0.0306463	0.114385	0.952768	0.897223	1.01175	8.90865	0.540795	-0.0177209	0.505814
CD45 on CD33+ HLA DR+ || id:ebi-a-GCST90002053	Inflammatory bowel disease	MR Egger	11	0.0264079	0.112196	0.819187	1.02676	0.824073	1.2793	8.42844	0.491612	NA	NA
CD45 on CD33+ HLA DR+ || id:ebi-a-GCST90002053	Inflammatory bowel disease	Weighted median	11	-0.083525	0.040169	0.037586	0.919868	0.850223	0.995218	NA	NA	NA	NA
CD8 on Central Memory CD8+ T cell || id:ebi-a-GCST90002054	Inflammatory bowel disease	Inverse variance weighted	12	-0.0342675	0.0357333	0.337568	0.966313	0.900951	1.03642	13.3122	0.273412	-0.0101156	0.644127
CD8 on Central Memory CD8+ T cell || id:ebi-a-GCST90002054	Inflammatory bowel disease	MR Egger	12	0.00663814	0.0935443	0.944827	1.00666	0.838024	1.20923	13.0169	0.222727	NA	NA
CD8 on Central Memory CD8+ T cell || id:ebi-a-GCST90002054	Inflammatory bowel disease	Weighted median	12	0.0265697	0.0424545	0.531421	1.02693	0.944933	1.11603	NA	NA	NA	NA
CD8 on naive CD8+ T cell || id:ebi-a-GCST90002055	Inflammatory bowel disease	Inverse variance weighted	9	-0.012067	0.0318282	0.704592	0.988006	0.928254	1.0516	7.27375	0.507405	-0.0282065	0.110257
CD8 on naive CD8+ T cell || id:ebi-a-GCST90002055	Inflammatory bowel disease	MR Egger	9	0.0859256	0.0623416	0.210549	1.08973	0.964386	1.23135	3.93192	0.787585	NA	NA
CD8 on naive CD8+ T cell || id:ebi-a-GCST90002055	Inflammatory bowel disease	Weighted median	9	0.0181732	0.037999	0.63247	1.01834	0.945251	1.09708	NA	NA	NA	NA
CD8 on Effector Memory CD8+ T cell || id:ebi-a-GCST90002056	Inflammatory bowel disease	Inverse variance weighted	18	0.0164408	0.0368978	0.655904	1.01658	0.945654	1.09282	22.7291	0.15828	-0.0147096	0.501173
CD8 on Effector Memory CD8+ T cell || id:ebi-a-GCST90002056	Inflammatory bowel disease	MR Egger	18	0.0933032	0.117805	0.439939	1.09779	0.871451	1.38293	22.0756	0.140768	NA	NA
CD8 on Effector Memory CD8+ T cell || id:ebi-a-GCST90002056	Inflammatory bowel disease	Weighted median	18	0.038898	0.0454779	0.392376	1.03966	0.951002	1.13659	NA	NA	NA	NA
CD8 on Terminally Differentiated CD8+ T cell || id:ebi-a-GCST90002057	Inflammatory bowel disease	Inverse variance weighted	11	-0.03754	0.0601331	0.532442	0.963156	0.856072	1.08363	18.594	0.0457337	-0.0382277	0.37512
CD8 on Terminally Differentiated CD8+ T cell || id:ebi-a-GCST90002057	Inflammatory bowel disease	MR Egger	11	0.19869	0.2603	0.464815	1.2198	0.732349	2.03171	16.9538	0.0494445	NA	NA
CD8 on Terminally Differentiated CD8+ T cell || id:ebi-a-GCST90002057	Inflammatory bowel disease	Weighted median	11	0.0449787	0.059269	0.447918	1.04601	0.931286	1.17486	NA	NA	NA	NA
CD8 on CD8+ T cell || id:ebi-a-GCST90002058	Inflammatory bowel disease	Inverse variance weighted	18	0.0361992	0.031964	0.257424	1.03686	0.973897	1.1039	23.9183	0.121671	0.024365	0.0906409
[truncated: 185 more rows]
