# Supplementary material for: The immune factors have complex causal regulation effects on inflammatory bowel disease
Source: Front Immunol. 2024 Jan 9;14:1322673. doi: 10.3389/fimmu.2023.1322673 (PMC10803565; doi:10.3389/fimmu.2023.1322673)
Supplement: Supplementary file 4 [file Table_4.xlsx]

## Sheet: Sheet1
Supplement Table S4: MR analysis of immune cell phenotypes on CD in IBDGC dataset
Exposure	Outcome	Method	NSNP	β	SE	Pval	OR	LCI	UCI	Cochran’s Q	Cochran’s Q test P	Egger_intercept	P_intercept
IgD+ B cell %B cell || id:ebi-a-GCST90001391	Crohn's disease	Inverse variance weighted	8	-0.00541273	0.0749143	0.942401	0.994602	0.858778	1.15191	3.3493	0.85092	0.0269804	0.624154
IgD+ B cell %B cell || id:ebi-a-GCST90001391	Crohn's disease	MR Egger	8	-0.163898	0.316008	0.622569	0.848828	0.456908	1.57693	3.0828	0.798385	NA	NA
IgD+ B cell %B cell || id:ebi-a-GCST90001391	Crohn's disease	Weighted median	8	-0.0208233	0.0957967	0.82792	0.979392	0.811732	1.18168	NA	NA	NA	NA
IgD+ CD38+ B cell Absolute Count || id:ebi-a-GCST90001392	Crohn's disease	Inverse variance weighted	16	-0.0148935	0.0642064	0.816566	0.985217	0.868717	1.11734	22.6981	0.0907627	-0.00773525	0.829598
IgD+ CD38+ B cell Absolute Count || id:ebi-a-GCST90001392	Crohn's disease	MR Egger	16	0.0338734	0.232083	0.886038	1.03445	0.656384	1.63029	22.6204	0.066733	NA	NA
IgD+ CD38+ B cell Absolute Count || id:ebi-a-GCST90001392	Crohn's disease	Weighted median	16	-0.0155377	0.08174	0.849241	0.984582	0.838829	1.15566	NA	NA	NA	NA
IgD+ CD38dim B cell %B cell || id:ebi-a-GCST90001393	Crohn's disease	Inverse variance weighted	12	-0.0295463	0.0599026	0.621843	0.970886	0.863333	1.09184	6.45183	0.841583	-0.0443598	0.19769
IgD+ CD38dim B cell %B cell || id:ebi-a-GCST90001393	Crohn's disease	MR Egger	12	0.280655	0.232646	0.255444	1.324	0.839179	2.08891	4.54774	0.919274	NA	NA
IgD+ CD38dim B cell %B cell || id:ebi-a-GCST90001393	Crohn's disease	Weighted median	12	-0.0199432	0.0808791	0.805233	0.980254	0.836552	1.14864	NA	NA	NA	NA
IgD+ CD38dim B cell Absolute Count || id:ebi-a-GCST90001394	Crohn's disease	Inverse variance weighted	14	-0.133061	0.0804516	0.0981425	0.875412	0.747705	1.02493	28.7046	0.00720732	-0.0471096	0.317236
IgD+ CD38dim B cell Absolute Count || id:ebi-a-GCST90001394	Crohn's disease	MR Egger	14	0.157332	0.28958	0.596864	1.17038	0.663488	2.06454	26.3161	0.00968058	NA	NA
IgD+ CD38dim B cell Absolute Count || id:ebi-a-GCST90001394	Crohn's disease	Weighted median	14	-0.0602146	0.0812774	0.458782	0.941562	0.802905	1.10416	NA	NA	NA	NA
IgD+ CD38- B cell %B cell || id:ebi-a-GCST90001395	Crohn's disease	Inverse variance weighted	12	-0.0368426	0.0632742	0.560385	0.963828	0.851411	1.09109	8.22258	0.693237	-0.0160936	0.641302
IgD+ CD38- B cell %B cell || id:ebi-a-GCST90001395	Crohn's disease	MR Egger	12	0.0699632	0.23117	0.76836	1.07247	0.681724	1.68718	7.99183	0.629635	NA	NA
IgD+ CD38- B cell %B cell || id:ebi-a-GCST90001395	Crohn's disease	Weighted median	12	-0.0165013	0.08591	0.847682	0.983634	0.8312	1.16402	NA	NA	NA	NA
IgD+ CD38- B cell Absolute Count || id:ebi-a-GCST90001396	Crohn's disease	Inverse variance weighted	11	-0.0194849	0.0588003	0.740362	0.980704	0.873949	1.1005	6.18526	0.799466	-0.0220355	0.477835
IgD+ CD38- B cell Absolute Count || id:ebi-a-GCST90001396	Crohn's disease	MR Egger	11	0.110002	0.184472	0.565665	1.11628	0.777584	1.6025	5.63683	0.775643	NA	NA
IgD+ CD38- B cell Absolute Count || id:ebi-a-GCST90001396	Crohn's disease	Weighted median	11	-0.026875	0.0753742	0.721425	0.973483	0.839786	1.12847	NA	NA	NA	NA
Unswitched memory B cell %B cell || id:ebi-a-GCST90001397	Crohn's disease	Inverse variance weighted	23	0.00470012	0.0608841	0.938466	1.00471	0.891694	1.13205	40.2614	0.0100758	0.0166136	0.622048
Unswitched memory B cell %B cell || id:ebi-a-GCST90001397	Crohn's disease	MR Egger	23	-0.103977	0.225873	0.650008	0.901246	0.578864	1.40317	39.7872	0.00789257	NA	NA
Unswitched memory B cell %B cell || id:ebi-a-GCST90001397	Crohn's disease	Weighted median	23	0.00967068	0.0692874	0.888997	1.00972	0.881498	1.15659	NA	NA	NA	NA
Unswitched memory B cell Absolute Count || id:ebi-a-GCST90001398	Crohn's disease	Inverse variance weighted	13	0.0883759	0.0795739	0.266735	1.0924	0.934645	1.27678	19.4817	0.0775478	0.00739626	0.851746
Unswitched memory B cell Absolute Count || id:ebi-a-GCST90001398	Crohn's disease	MR Egger	13	0.0451511	0.240663	0.854597	1.04619	0.652759	1.67674	19.4171	0.0540055	NA	NA
Unswitched memory B cell Absolute Count || id:ebi-a-GCST90001398	Crohn's disease	Weighted median	13	0.0634563	0.0898466	0.480018	1.06551	0.89347	1.27068	NA	NA	NA	NA
IgD- CD27- B cell %B cell || id:ebi-a-GCST90001399	Crohn's disease	Inverse variance weighted	12	-0.139663	0.0724442	0.053872	0.869652	0.754535	1.00233	27.1521	0.00435821	0.0329257	0.286454
IgD- CD27- B cell %B cell || id:ebi-a-GCST90001399	Crohn's disease	MR Egger	12	-0.295228	0.155596	0.086995	0.744362	0.548704	1.00979	24.0968	0.00734753	NA	NA
IgD- CD27- B cell %B cell || id:ebi-a-GCST90001399	Crohn's disease	Weighted median	12	-0.224965	0.0582261	0.000111709	0.798544	0.71242	0.89508	NA	NA	NA	NA
IgD+ B cell Absolute Count || id:ebi-a-GCST90001400	Crohn's disease	Inverse variance weighted	11	-0.0714135	0.0808993	0.377374	0.931077	0.794552	1.09106	23.2927	0.00971637	-0.000487811	0.991673
IgD+ B cell Absolute Count || id:ebi-a-GCST90001400	Crohn's disease	MR Egger	11	-0.0687266	0.264543	0.800868	0.933582	0.555865	1.56796	23.2924	0.00557205	NA	NA
IgD+ B cell Absolute Count || id:ebi-a-GCST90001400	Crohn's disease	Weighted median	11	0.0110494	0.071908	0.877878	1.01111	0.878192	1.16415	NA	NA	NA	NA
IgD- CD27- B cell Absolute Count || id:ebi-a-GCST90001401	Crohn's disease	Inverse variance weighted	22	-0.0747116	0.0590915	0.206109	0.928011	0.82652	1.04196	38.1825	0.0122684	-0.0161676	0.613802
IgD- CD27- B cell Absolute Count || id:ebi-a-GCST90001401	Crohn's disease	MR Egger	22	0.010956	0.177601	0.951423	1.01102	0.713807	1.43198	37.6872	0.00966765	NA	NA
IgD- CD27- B cell Absolute Count || id:ebi-a-GCST90001401	Crohn's disease	Weighted median	22	-0.11584	0.0720265	0.107771	0.890618	0.773359	1.02566	NA	NA	NA	NA
Switched memory B cell %B cell || id:ebi-a-GCST90001402	Crohn's disease	Inverse variance weighted	8	0.0126895	0.0738393	0.863553	1.01277	0.87631	1.17048	3.2556	0.860393	-0.00600633	0.925407
Switched memory B cell %B cell || id:ebi-a-GCST90001402	Crohn's disease	MR Egger	8	0.0552007	0.441657	0.904618	1.05675	0.444659	2.51142	3.24607	0.777389	NA	NA
Switched memory B cell %B cell || id:ebi-a-GCST90001402	Crohn's disease	Weighted median	8	0.0267738	0.0943024	0.776476	1.02714	0.8538	1.23566	NA	NA	NA	NA
Switched memory B cell Absolute Count || id:ebi-a-GCST90001403	Crohn's disease	Inverse variance weighted	16	0.0341429	0.0628666	0.587061	1.03473	0.914776	1.17042	21.0327	0.135787	-0.100815	0.0178741
Switched memory B cell Absolute Count || id:ebi-a-GCST90001403	Crohn's disease	MR Egger	16	0.723377	0.262408	0.0154409	2.06138	1.23252	3.44767	13.8394	0.461743	NA	NA
Switched memory B cell Absolute Count || id:ebi-a-GCST90001403	Crohn's disease	Weighted median	16	0.0626143	0.0752547	0.405391	1.06462	0.918618	1.23382	NA	NA	NA	NA
Plasma Blast-Plasma Cell %B cell || id:ebi-a-GCST90001404	Crohn's disease	Inverse variance weighted	18	0.0241379	0.0515222	0.63943	1.02443	0.926033	1.13329	12.9882	0.736973	0.0216133	0.480025
Plasma Blast-Plasma Cell %B cell || id:ebi-a-GCST90001404	Crohn's disease	MR Egger	18	-0.0980136	0.176598	0.586565	0.906637	0.641372	1.28161	12.4653	0.711378	NA	NA
Plasma Blast-Plasma Cell %B cell || id:ebi-a-GCST90001404	Crohn's disease	Weighted median	18	-0.0480393	0.0721566	0.505562	0.953096	0.827401	1.09789	NA	NA	NA	NA
Plasma Blast-Plasma Cell Absolute Count || id:ebi-a-GCST90001405	Crohn's disease	Inverse variance weighted	14	0.0116639	0.081106	0.88565	1.01173	0.863032	1.18605	21.2405	0.0683055	0.0425871	0.327489
Plasma Blast-Plasma Cell Absolute Count || id:ebi-a-GCST90001405	Crohn's disease	MR Egger	14	-0.290207	0.306607	0.362558	0.748108	0.410181	1.36444	19.5435	0.0762303	NA	NA
Plasma Blast-Plasma Cell Absolute Count || id:ebi-a-GCST90001405	Crohn's disease	Weighted median	14	-0.0658126	0.0901303	0.465272	0.936306	0.784689	1.11722	NA	NA	NA	NA
Memory B cell %B cell || id:ebi-a-GCST90001406	Crohn's disease	Inverse variance weighted	18	-0.0344404	0.0494236	0.485902	0.966146	0.876945	1.06442	18.7329	0.344078	-0.0454931	0.116533
Memory B cell %B cell || id:ebi-a-GCST90001406	Crohn's disease	MR Egger	18	0.249879	0.177703	0.178801	1.28387	0.906269	1.8188	15.9797	0.454377	NA	NA
Memory B cell %B cell || id:ebi-a-GCST90001406	Crohn's disease	Weighted median	18	0.00321359	0.068674	0.962677	1.00322	0.876878	1.14776	NA	NA	NA	NA
Memory B cell Absolute Count || id:ebi-a-GCST90001407	Crohn's disease	Inverse variance weighted	10	-0.00159715	0.0681045	0.98129	0.998404	0.873644	1.14098	9.01775	0.435637	-0.00264255	0.937049
Memory B cell Absolute Count || id:ebi-a-GCST90001407	Crohn's disease	MR Egger	10	0.0148946	0.214858	0.946434	1.01501	0.666159	1.54653	9.01027	0.34143	NA	NA
Memory B cell Absolute Count || id:ebi-a-GCST90001407	Crohn's disease	Weighted median	10	-0.0511386	0.093019	0.582481	0.950147	0.791793	1.14017	NA	NA	NA	NA
Naive-mature B cell %B cell || id:ebi-a-GCST90001408	Crohn's disease	Inverse variance weighted	19	-0.005981	0.047946	0.900726	0.994037	0.904878	1.09198	19.4596	0.36405	0.0338788	0.216248
Naive-mature B cell %B cell || id:ebi-a-GCST90001408	Crohn's disease	MR Egger	19	-0.218644	0.17215	0.221167	0.803608	0.573465	1.12611	17.7384	0.405521	NA	NA
Naive-mature B cell %B cell || id:ebi-a-GCST90001408	Crohn's disease	Weighted median	19	-0.0405316	0.0623381	0.51557	0.960279	0.849834	1.08508	NA	NA	NA	NA
Naive-mature B cell Absolute Count || id:ebi-a-GCST90001409	Crohn's disease	Inverse variance weighted	19	-0.0908529	0.0705526	0.197839	0.913152	0.79522	1.04857	42.174	0.00104565	0.00348341	0.931424
Naive-mature B cell Absolute Count || id:ebi-a-GCST90001409	Crohn's disease	MR Egger	19	-0.1112	0.244015	0.654367	0.89476	0.554621	1.4435	42.1551	0.000636952	NA	NA
Naive-mature B cell Absolute Count || id:ebi-a-GCST90001409	Crohn's disease	Weighted median	19	-0.00914037	0.070286	0.89653	0.990901	0.86338	1.13726	NA	NA	NA	NA
IgD- CD38+ B cell %B cell || id:ebi-a-GCST90001410	Crohn's disease	Inverse variance weighted	11	0.0652502	0.0640266	0.30815	1.06743	0.941537	1.21015	8.13026	0.616115	-0.0101642	0.764765
IgD- CD38+ B cell %B cell || id:ebi-a-GCST90001410	Crohn's disease	MR Egger	11	0.133126	0.229185	0.575585	1.14239	0.729003	1.7902	8.03512	0.530611	NA	NA
IgD- CD38+ B cell %B cell || id:ebi-a-GCST90001410	Crohn's disease	Weighted median	11	0.0138716	0.0887776	0.875835	1.01397	0.852031	1.20668	NA	NA	NA	NA
IgD+ CD24+ B cell %B cell || id:ebi-a-GCST90001411	Crohn's disease	Inverse variance weighted	14	0.0210603	0.0639904	0.742067	1.02128	0.9009	1.15775	11.6203	0.559	-0.0443792	0.264694
IgD+ CD24+ B cell %B cell || id:ebi-a-GCST90001411	Crohn's disease	MR Egger	14	0.330154	0.271811	0.247862	1.39118	0.816609	2.37003	10.2513	0.593929	NA	NA
IgD+ CD24+ B cell %B cell || id:ebi-a-GCST90001411	Crohn's disease	Weighted median	14	-0.036985	0.0864759	0.668875	0.963691	0.813444	1.14169	NA	NA	NA	NA
IgD+ CD24+ B cell Absolute Count || id:ebi-a-GCST90001412	Crohn's disease	Inverse variance weighted	19	0.0263783	0.0578656	0.648494	1.02673	0.916642	1.15004	23.1701	0.184139	0.00209609	0.951627
IgD+ CD24+ B cell Absolute Count || id:ebi-a-GCST90001412	Crohn's disease	MR Egger	19	0.0131252	0.22335	0.953825	1.01321	0.654004	1.56971	23.1649	0.143959	NA	NA
IgD+ CD24+ B cell Absolute Count || id:ebi-a-GCST90001412	Crohn's disease	Weighted median	19	0.0636057	0.0735198	0.386956	1.06567	0.922661	1.23085	NA	NA	NA	NA
IgD- CD24- B cell %B cell || id:ebi-a-GCST90001413	Crohn's disease	Inverse variance weighted	9	-0.0521483	0.0617536	0.398414	0.949188	0.840982	1.07132	5.98155	0.649299	-0.0211308	0.586003
IgD- CD24- B cell %B cell || id:ebi-a-GCST90001413	Crohn's disease	MR Egger	9	0.0555056	0.198463	0.787809	1.05707	0.716424	1.5597	5.65577	0.580468	NA	NA
IgD- CD24- B cell %B cell || id:ebi-a-GCST90001413	Crohn's disease	Weighted median	9	-0.0156665	0.084429	0.852791	0.984456	0.834312	1.16162	NA	NA	NA	NA
IgD- CD24- B cell Absolute Count || id:ebi-a-GCST90001414	Crohn's disease	Inverse variance weighted	13	0.0467541	0.0649732	0.471777	1.04786	0.922569	1.19018	12.7286	0.389075	-0.00701478	0.875585
IgD- CD24- B cell Absolute Count || id:ebi-a-GCST90001414	Crohn's disease	MR Egger	13	0.0871391	0.260961	0.744722	1.09105	0.654199	1.81961	12.6989	0.313459	NA	NA
IgD- CD24- B cell Absolute Count || id:ebi-a-GCST90001414	Crohn's disease	Weighted median	13	0.0886388	0.0911971	0.331077	1.09269	0.913833	1.30654	NA	NA	NA	NA
IgD+ CD24- B cell %B cell || id:ebi-a-GCST90001415	Crohn's disease	Inverse variance weighted	13	0.0208999	0.0632716	0.741158	1.02112	0.902025	1.15594	13.3427	0.344631	0.00431251	0.909415
IgD+ CD24- B cell %B cell || id:ebi-a-GCST90001415	Crohn's disease	MR Egger	13	-0.00412021	0.224825	0.985707	0.995888	0.640967	1.54734	13.3263	0.272536	NA	NA
IgD+ CD24- B cell %B cell || id:ebi-a-GCST90001415	Crohn's disease	Weighted median	13	0.0196883	0.0866822	0.820321	1.01988	0.860528	1.20875	NA	NA	NA	NA
IgD+ CD24- B cell Absolute Count || id:ebi-a-GCST90001416	Crohn's disease	Inverse variance weighted	13	-0.161046	0.0722069	0.0257248	0.851253	0.738916	0.980669	20.359	0.0605916	-0.0202093	0.635896
IgD+ CD24- B cell Absolute Count || id:ebi-a-GCST90001416	Crohn's disease	MR Egger	13	-0.0469558	0.24592	0.852052	0.95413	0.589218	1.54504	19.9296	0.0463162	NA	NA
IgD+ CD24- B cell Absolute Count || id:ebi-a-GCST90001416	Crohn's disease	Weighted median	13	-0.0657535	0.0784843	0.402148	0.936362	0.802854	1.09207	NA	NA	NA	NA
CD24+ CD27+ B cell %B cell || id:ebi-a-GCST90001417	Crohn's disease	Inverse variance weighted	15	-0.0141638	0.0640587	0.825009	0.985936	0.869603	1.11783	17.6798	0.221757	-0.0550805	0.124753
CD24+ CD27+ B cell %B cell || id:ebi-a-GCST90001417	Crohn's disease	MR Egger	15	0.309972	0.206581	0.157379	1.36339	0.90944	2.04392	14.6459	0.329977	NA	NA
CD24+ CD27+ B cell %B cell || id:ebi-a-GCST90001417	Crohn's disease	Weighted median	15	-0.00553362	0.0838036	0.947353	0.994482	0.843843	1.17201	NA	NA	NA	NA
CD24+ CD27+ B cell Absolute Count || id:ebi-a-GCST90001418	Crohn's disease	Inverse variance weighted	15	0.104656	0.0589325	0.0757556	1.11033	0.989207	1.24628	8.65059	0.852761	0.00319059	0.919958
CD24+ CD27+ B cell Absolute Count || id:ebi-a-GCST90001418	Crohn's disease	MR Egger	15	0.0841989	0.208181	0.692457	1.08785	0.723369	1.63597	8.6401	0.79955	NA	NA
CD24+ CD27+ B cell Absolute Count || id:ebi-a-GCST90001418	Crohn's disease	Weighted median	15	0.105653	0.0774319	0.172423	1.11144	0.954933	1.29359	NA	NA	NA	NA
CD20- B cell %B cell || id:ebi-a-GCST90001419	Crohn's disease	Inverse variance weighted	15	-0.0800284	0.0780069	0.304932	0.92309	0.792215	1.07559	30.9733	0.00559144	0.0291433	0.513656
CD20- B cell %B cell || id:ebi-a-GCST90001419	Crohn's disease	MR Egger	15	-0.23677	0.246613	0.354528	0.789173	0.486688	1.27966	29.935	0.00481238	NA	NA
CD20- B cell %B cell || id:ebi-a-GCST90001419	Crohn's disease	Weighted median	15	-0.0299197	0.074804	0.689176	0.970524	0.838169	1.12378	NA	NA	NA	NA
IgD- CD38+ B cell Absolute Count || id:ebi-a-GCST90001420	Crohn's disease	Inverse variance weighted	10	0.103837	0.0705808	0.141242	1.10942	0.966087	1.27402	4.89925	0.843001	-0.0325828	0.448504
IgD- CD38+ B cell Absolute Count || id:ebi-a-GCST90001420	Crohn's disease	MR Egger	10	0.310389	0.268629	0.281244	1.36396	0.805636	2.3092	4.26418	0.832536	NA	NA
IgD- CD38+ B cell Absolute Count || id:ebi-a-GCST90001420	Crohn's disease	Weighted median	10	0.0650351	0.0893091	0.46649	1.0672	0.895825	1.27135	NA	NA	NA	NA
CD20- B cell Absolute Count || id:ebi-a-GCST90001421	Crohn's disease	Inverse variance weighted	21	-0.0228371	0.0558825	0.682787	0.977422	0.87602	1.09056	27.2371	0.128725	0.00018045	0.995638
CD20- B cell Absolute Count || id:ebi-a-GCST90001421	Crohn's disease	MR Egger	21	-0.0240614	0.228311	0.917172	0.976226	0.624034	1.52719	27.237	0.0992517	NA	NA
CD20- B cell Absolute Count || id:ebi-a-GCST90001421	Crohn's disease	Weighted median	21	-0.015379	0.0698956	0.825849	0.984739	0.858667	1.12932	NA	NA	NA	NA
CD20- CD38- B cell %B cell || id:ebi-a-GCST90001422	Crohn's disease	Inverse variance weighted	19	0.0159037	0.0557987	0.77563	1.01603	0.910773	1.13345	22.2077	0.222893	0.0488644	0.142824
CD20- CD38- B cell %B cell || id:ebi-a-GCST90001422	Crohn's disease	MR Egger	19	-0.284687	0.2029	0.178589	0.752249	0.505417	1.11963	19.4998	0.300608	NA	NA
CD20- CD38- B cell %B cell || id:ebi-a-GCST90001422	Crohn's disease	Weighted median	19	0.0447717	0.0749041	0.550027	1.04579	0.902993	1.21117	NA	NA	NA	NA
CD20- CD38- B cell Absolute Count || id:ebi-a-GCST90001423	Crohn's disease	Inverse variance weighted	15	-0.0441477	0.059592	0.458794	0.956813	0.851336	1.07536	15.3667	0.353553	0.0442945	0.26006
CD20- CD38- B cell Absolute Count || id:ebi-a-GCST90001423	Crohn's disease	MR Egger	15	-0.309002	0.232463	0.206622	0.734179	0.465506	1.15792	13.8855	0.381957	NA	NA
CD20- CD38- B cell Absolute Count || id:ebi-a-GCST90001423	Crohn's disease	Weighted median	15	-0.0945035	0.0808494	0.24245	0.909825	0.776493	1.06605	NA	NA	NA	NA
IgD+ B cell %Lymphocyte || id:ebi-a-GCST90001424	Crohn's disease	Inverse variance weighted	13	0.0374837	0.0742807	0.613824	1.0382	0.897532	1.2009	19.4233	0.0788129	0.000616566	0.987571
IgD+ B cell %Lymphocyte || id:ebi-a-GCST90001424	Crohn's disease	MR Egger	13	0.0337853	0.244709	0.892685	1.03436	0.640284	1.67099	19.4228	0.0539133	NA	NA
IgD+ B cell %Lymphocyte || id:ebi-a-GCST90001424	Crohn's disease	Weighted median	13	0.00753822	0.0869829	0.930939	1.00757	0.849635	1.19485	NA	NA	NA	NA
IgD- CD38+ B cell %lymphocyte || id:ebi-a-GCST90001425	Crohn's disease	Inverse variance weighted	16	0.0714185	0.0580455	0.218552	1.07403	0.958534	1.20344	15.7991	0.395525	-0.00846741	0.775265
IgD- CD38+ B cell %lymphocyte || id:ebi-a-GCST90001425	Crohn's disease	MR Egger	16	0.12615	0.197345	0.532991	1.13445	0.770553	1.67021	15.7041	0.331776	NA	NA
IgD- CD38+ B cell %lymphocyte || id:ebi-a-GCST90001425	Crohn's disease	Weighted median	16	0.0919052	0.0775355	0.235887	1.09626	0.941704	1.27618	NA	NA	NA	NA
IgD- CD38dim B cell %lymphocyte || id:ebi-a-GCST90001426	Crohn's disease	Inverse variance weighted	14	0.00243952	0.0543501	0.964199	1.00244	0.901147	1.11512	12.7146	0.470094	-0.033766	0.364308
IgD- CD38dim B cell %lymphocyte || id:ebi-a-GCST90001426	Crohn's disease	MR Egger	14	0.236716	0.254327	0.370329	1.26708	0.769691	2.08589	11.8254	0.459801	NA	NA
IgD- CD38dim B cell %lymphocyte || id:ebi-a-GCST90001426	Crohn's disease	Weighted median	14	0.119266	0.0753514	0.113468	1.12667	0.971977	1.30598	NA	NA	NA	NA
IgD- CD38- B cell %lymphocyte || id:ebi-a-GCST90001427	Crohn's disease	Inverse variance weighted	22	0.0412939	0.0484778	0.394319	1.04216	0.947695	1.14604	19.6726	0.542078	-0.00155191	0.963327
IgD- CD38- B cell %lymphocyte || id:ebi-a-GCST90001427	Crohn's disease	MR Egger	22	0.0523577	0.242526	0.831264	1.05375	0.655083	1.69504	19.6704	0.47871	NA	NA
IgD- CD38- B cell %lymphocyte || id:ebi-a-GCST90001427	Crohn's disease	Weighted median	22	0.0450119	0.0682336	0.509463	1.04604	0.915096	1.19572	NA	NA	NA	NA
IgD- CD38dim B cell %B cell || id:ebi-a-GCST90001428	Crohn's disease	Inverse variance weighted	15	0.0593193	0.0849917	0.485213	1.06111	0.898288	1.25345	30.793	0.00592528	0.0274422	0.52738
IgD- CD38dim B cell %B cell || id:ebi-a-GCST90001428	Crohn's disease	MR Egger	15	-0.111287	0.276678	0.694053	0.894682	0.520183	1.5388	29.8255	0.00499011	NA	NA
IgD- CD38dim B cell %B cell || id:ebi-a-GCST90001428	Crohn's disease	Weighted median	15	-0.0033353	0.0836365	0.96819	0.99667	0.845977	1.17421	NA	NA	NA	NA
IgD+ CD38+ B cell %lymphocyte || id:ebi-a-GCST90001429	Crohn's disease	Inverse variance weighted	17	-0.0768581	0.07583	0.310794	0.926021	0.798129	1.07441	35.2735	0.00364554	0.00157079	0.974375
IgD+ CD38+ B cell %lymphocyte || id:ebi-a-GCST90001429	Crohn's disease	MR Egger	17	-0.0872669	0.328161	0.793916	0.916433	0.481687	1.74356	35.271	0.00224963	NA	NA
IgD+ CD38+ B cell %lymphocyte || id:ebi-a-GCST90001429	Crohn's disease	Weighted median	17	0.0587444	0.0777563	0.449953	1.0605	0.910594	1.23509	NA	NA	NA	NA
IgD+ CD38dim B cell %lymphocyte || id:ebi-a-GCST90001430	Crohn's disease	Inverse variance weighted	22	-0.0427322	0.0480437	0.373764	0.958168	0.872059	1.05278	23.3612	0.325025	0.0521408	0.068556
IgD+ CD38dim B cell %lymphocyte || id:ebi-a-GCST90001430	Crohn's disease	MR Egger	22	-0.378742	0.180386	0.0486548	0.684723	0.480803	0.97513	19.6552	0.479678	NA	NA
IgD+ CD38dim B cell %lymphocyte || id:ebi-a-GCST90001430	Crohn's disease	Weighted median	22	-0.0635114	0.0632741	0.315499	0.938463	0.829005	1.06237	NA	NA	NA	NA
IgD+ CD38- B cell %lymphocyte || id:ebi-a-GCST90001431	Crohn's disease	Inverse variance weighted	12	0.0411566	0.0695123	0.5538	1.04202	0.909293	1.19411	12.7512	0.309896	0.0276159	0.557494
IgD+ CD38- B cell %lymphocyte || id:ebi-a-GCST90001431	Crohn's disease	MR Egger	12	-0.115642	0.26813	0.675406	0.890794	0.526673	1.50665	12.2984	0.265585	NA	NA
IgD+ CD38- B cell %lymphocyte || id:ebi-a-GCST90001431	Crohn's disease	Weighted median	12	0.106832	0.0878533	0.223973	1.11275	0.93673	1.32184	NA	NA	NA	NA
Unswitched memory B cell %lymphocyte || id:ebi-a-GCST90001432	Crohn's disease	Inverse variance weighted	15	0.0576832	0.0671671	0.39045	1.05938	0.928705	1.20844	20.0556	0.128398	0.0126952	0.750567
Unswitched memory B cell %lymphocyte || id:ebi-a-GCST90001432	Crohn's disease	MR Egger	15	-0.0211027	0.252371	0.934634	0.979118	0.597052	1.60568	19.8943	0.0978786	NA	NA
Unswitched memory B cell %lymphocyte || id:ebi-a-GCST90001432	Crohn's disease	Weighted median	15	0.0617957	0.0815586	0.44864	1.06374	0.906595	1.24814	NA	NA	NA	NA
IgD- CD27- B cell %lymphocyte || id:ebi-a-GCST90001433	Crohn's disease	Inverse variance weighted	14	-0.118951	0.0564505	0.0351032	0.887852	0.794857	0.991727	19.6588	0.104051	-0.00617967	0.83904
IgD- CD27- B cell %lymphocyte || id:ebi-a-GCST90001433	Crohn's disease	MR Egger	14	-0.0889017	0.156189	0.579724	0.914935	0.673658	1.24263	19.5885	0.0752824	NA	NA
IgD- CD27- B cell %lymphocyte || id:ebi-a-GCST90001433	Crohn's disease	Weighted median	14	-0.107101	0.0736844	0.146084	0.898435	0.777616	1.03803	NA	NA	NA	NA
Switched memory B cell %lymphocyte || id:ebi-a-GCST90001434	Crohn's disease	Inverse variance weighted	13	0.0896574	0.0545266	0.100117	1.0938	0.982933	1.21717	8.97227	0.705297	-0.026561	0.519571
Switched memory B cell %lymphocyte || id:ebi-a-GCST90001434	Crohn's disease	MR Egger	13	0.253884	0.252801	0.336821	1.28902	0.785366	2.11568	8.52966	0.665218	NA	NA
Switched memory B cell %lymphocyte || id:ebi-a-GCST90001434	Crohn's disease	Weighted median	13	0.114815	0.0715598	0.108611	1.12167	0.974879	1.29056	NA	NA	NA	NA
Plasma Blast-Plasma Cell %lymphocyte || id:ebi-a-GCST90001435	Crohn's disease	Inverse variance weighted	13	0.0998335	0.0756753	0.18709	1.10499	0.952667	1.28166	18.7127	0.0957009	0.011172	0.834316
Plasma Blast-Plasma Cell %lymphocyte || id:ebi-a-GCST90001435	Crohn's disease	MR Egger	13	0.025265	0.356961	0.944845	1.02559	0.509472	2.06454	18.635	0.0679682	NA	NA
Plasma Blast-Plasma Cell %lymphocyte || id:ebi-a-GCST90001435	Crohn's disease	Weighted median	13	0.0202324	0.0865738	0.815217	1.02044	0.86118	1.20915	NA	NA	NA	NA
Memory B cell %lymphocyte || id:ebi-a-GCST90001436	Crohn's disease	Inverse variance weighted	19	0.133071	0.0691002	0.0541331	1.14233	0.997638	1.30801	35.842	0.00739206	-0.0309529	0.418916
Memory B cell %lymphocyte || id:ebi-a-GCST90001436	Crohn's disease	MR Egger	19	0.33484	0.253341	0.20378	1.39772	0.85069	2.2965	34.4513	0.00733831	NA	NA
Memory B cell %lymphocyte || id:ebi-a-GCST90001436	Crohn's disease	Weighted median	19	0.12908	0.0708885	0.0686231	1.13778	0.990187	1.30738	NA	NA	NA	NA
Naive-mature B cell %lymphocyte || id:ebi-a-GCST90001437	Crohn's disease	Inverse variance weighted	17	-0.0712032	0.0549185	0.194794	0.931273	0.836237	1.03711	14.6416	0.55103	-0.00532849	0.838786
Naive-mature B cell %lymphocyte || id:ebi-a-GCST90001437	Crohn's disease	MR Egger	17	-0.0401721	0.159645	0.804739	0.960624	0.702523	1.31355	14.5987	0.480689	NA	NA
Naive-mature B cell %lymphocyte || id:ebi-a-GCST90001437	Crohn's disease	Weighted median	17	-0.101565	0.0800896	0.204746	0.903422	0.772177	1.05697	NA	NA	NA	NA
IgD- CD38dim B cell Absolute Count || id:ebi-a-GCST90001438	Crohn's disease	Inverse variance weighted	11	0.0559763	0.0695243	0.420743	1.05757	0.922847	1.21197	7.89831	0.638769	-0.0719317	0.287185
IgD- CD38dim B cell Absolute Count || id:ebi-a-GCST90001438	Crohn's disease	MR Egger	11	0.592198	0.479072	0.247697	1.80796	0.706958	4.62363	6.61854	0.676766	NA	NA
IgD- CD38dim B cell Absolute Count || id:ebi-a-GCST90001438	Crohn's disease	Weighted median	11	0.109626	0.0903209	0.224849	1.11586	0.934818	1.33196	NA	NA	NA	NA
IgD+ CD24+ B cell %lymphocyte || id:ebi-a-GCST90001439	Crohn's disease	Inverse variance weighted	12	0.0712401	0.0602044	0.236689	1.07384	0.954316	1.20833	4.63653	0.947485	-0.00369616	0.904301
IgD+ CD24+ B cell %lymphocyte || id:ebi-a-GCST90001439	Crohn's disease	MR Egger	12	0.0931042	0.187245	0.629776	1.09758	0.76041	1.58424	4.62132	0.914998	NA	NA
IgD+ CD24+ B cell %lymphocyte || id:ebi-a-GCST90001439	Crohn's disease	Weighted median	12	0.0484313	0.0741521	0.513669	1.04962	0.907641	1.21382	NA	NA	NA	NA
IgD- CD24- B cell %lymphocyte || id:ebi-a-GCST90001440	Crohn's disease	Inverse variance weighted	18	-0.0395124	0.057116	0.489068	0.961258	0.859453	1.07512	19.6121	0.294548	0.00334071	0.909635
IgD- CD24- B cell %lymphocyte || id:ebi-a-GCST90001440	Crohn's disease	MR Egger	18	-0.0603495	0.190048	0.754934	0.941435	0.648661	1.36635	19.5958	0.238978	NA	NA
IgD- CD24- B cell %lymphocyte || id:ebi-a-GCST90001440	Crohn's disease	Weighted median	18	0.0133305	0.0781417	0.864543	1.01342	0.869508	1.18115	NA	NA	NA	NA
IgD+ CD24- B cell %lymphocyte || id:ebi-a-GCST90001441	Crohn's disease	Inverse variance weighted	17	0.0714029	0.0590209	0.22636	1.07401	0.956688	1.20573	18.0161	0.322953	0.0482154	0.204928
IgD+ CD24- B cell %lymphocyte || id:ebi-a-GCST90001441	Crohn's disease	MR Egger	17	-0.243311	0.244382	0.335227	0.784027	0.485634	1.26577	16.1279	0.373606	NA	NA
IgD+ CD24- B cell %lymphocyte || id:ebi-a-GCST90001441	Crohn's disease	Weighted median	17	0.1037	0.0820402	0.206225	1.10927	0.944501	1.30278	NA	NA	NA	NA
CD24+ CD27+ B cell %lymphocyte || id:ebi-a-GCST90001442	Crohn's disease	Inverse variance weighted	14	0.0179271	0.0582702	0.758345	1.01809	0.908207	1.14126	12.6722	0.473441	-0.000663054	0.982871
CD24+ CD27+ B cell %lymphocyte || id:ebi-a-GCST90001442	Crohn's disease	MR Egger	14	0.0222626	0.206644	0.915987	1.02251	0.681977	1.53309	12.6717	0.39335	NA	NA
CD24+ CD27+ B cell %lymphocyte || id:ebi-a-GCST90001442	Crohn's disease	Weighted median	14	-0.0738784	0.0784953	0.346612	0.928785	0.79634	1.08326	NA	NA	NA	NA
CD20- B cell %lymphocyte || id:ebi-a-GCST90001443	Crohn's disease	Inverse variance weighted	11	-0.100618	0.0751571	0.180646	0.904278	0.780418	1.0478	15.3657	0.119286	0.0651777	0.141929
CD20- B cell %lymphocyte || id:ebi-a-GCST90001443	Crohn's disease	MR Egger	11	-0.502084	0.258993	0.0844989	0.605268	0.364325	1.00556	11.9309	0.217235	NA	NA
CD20- B cell %lymphocyte || id:ebi-a-GCST90001443	Crohn's disease	Weighted median	11	-0.0989822	0.0883294	0.262457	0.905759	0.761772	1.07696	NA	NA	NA	NA
CD20- CD38- B cell %lymphocyte || id:ebi-a-GCST90001444	Crohn's disease	Inverse variance weighted	20	0.0263739	0.0620589	0.670851	1.02672	0.909135	1.15952	28.8772	0.0679411	-0.0078469	0.84019
CD20- CD38- B cell %lymphocyte || id:ebi-a-GCST90001444	Crohn's disease	MR Egger	20	0.0748938	0.245562	0.763873	1.07777	0.666038	1.74403	28.8102	0.0507483	NA	NA
CD20- CD38- B cell %lymphocyte || id:ebi-a-GCST90001444	Crohn's disease	Weighted median	20	0.0799552	0.080265	0.319181	1.08324	0.925553	1.26779	NA	NA	NA	NA
IgD- CD38- B cell %B cell || id:ebi-a-GCST90001445	Crohn's disease	Inverse variance weighted	6	0.050278	0.0816279	0.537933	1.05156	0.896092	1.23401	3.37255	0.642753	0.00733598	0.918411
IgD- CD38- B cell %B cell || id:ebi-a-GCST90001445	Crohn's disease	MR Egger	6	0.00708989	0.404349	0.98685	1.00712	0.455922	2.22468	3.36066	0.499379	NA	NA
IgD- CD38- B cell %B cell || id:ebi-a-GCST90001445	Crohn's disease	Weighted median	6	0.0822582	0.104053	0.429211	1.08574	0.885427	1.33136	NA	NA	NA	NA
IgD- CD38- B cell Absolute Count || id:ebi-a-GCST90001446	Crohn's disease	Inverse variance weighted	7	0.0453121	0.0971455	0.640904	1.04635	0.864942	1.26582	3.97905	0.679511	-0.0515556	0.43366
IgD- CD38- B cell Absolute Count || id:ebi-a-GCST90001446	Crohn's disease	MR Egger	7	0.326565	0.344506	0.386697	1.3862	0.705628	2.72317	3.25498	0.660742	NA	NA
IgD- CD38- B cell Absolute Count || id:ebi-a-GCST90001446	Crohn's disease	Weighted median	7	0.0369005	0.122908	0.764004	1.03759	0.815462	1.32022	NA	NA	NA	NA
IgD+ CD38+ B cell %B cell || id:ebi-a-GCST90001447	Crohn's disease	Inverse variance weighted	14	-0.0708499	0.0668575	0.289274	0.931602	0.817184	1.06204	19.3757	0.111908	0.0227261	0.603574
IgD+ CD38+ B cell %B cell || id:ebi-a-GCST90001447	Crohn's disease	MR Egger	14	-0.181431	0.218467	0.422488	0.834076	0.543554	1.27988	18.9271	0.0903021	NA	NA
IgD+ CD38+ B cell %B cell || id:ebi-a-GCST90001447	Crohn's disease	Weighted median	14	0.00509755	0.0819301	0.950389	1.00511	0.856	1.1802	NA	NA	NA	NA
CD11c+ monocyte Absolute Count || id:ebi-a-GCST90001448	Crohn's disease	Inverse variance weighted	10	0.129124	0.0745533	0.0832802	1.13783	0.983143	1.31686	3.40415	0.946099	-0.0259848	0.549597
CD11c+ monocyte Absolute Count || id:ebi-a-GCST90001448	Crohn's disease	MR Egger	10	0.268387	0.235081	0.286607	1.30785	0.824999	2.07331	3.01397	0.933478	NA	NA
CD11c+ monocyte Absolute Count || id:ebi-a-GCST90001448	Crohn's disease	Weighted median	10	0.11809	0.102725	0.250318	1.12535	0.92012	1.37635	NA	NA	NA	NA
CD11c+ monocyte %monocyte || id:ebi-a-GCST90001449	Crohn's disease	Inverse variance weighted	13	-0.0307763	0.054803	0.574402	0.969692	0.870933	1.07965	12.9934	0.369522	0.0338374	0.35966
CD11c+ monocyte %monocyte || id:ebi-a-GCST90001449	Crohn's disease	MR Egger	13	-0.223746	0.209231	0.307807	0.799518	0.530551	1.20484	11.9968	0.363881	NA	NA
CD11c+ monocyte %monocyte || id:ebi-a-GCST90001449	Crohn's disease	Weighted median	13	-0.0130468	0.0746262	0.861214	0.987038	0.852728	1.1425	NA	NA	NA	NA
CD62L- monocyte Absolute Count || id:ebi-a-GCST90001450	Crohn's disease	Inverse variance weighted	16	-0.103004	0.0464387	0.0265499	0.902123	0.823638	0.988087	15.7793	0.396868	-0.0134218	0.653263
CD62L- monocyte Absolute Count || id:ebi-a-GCST90001450	Crohn's disease	MR Egger	16	-0.0325217	0.160791	0.842622	0.968001	0.706331	1.32661	15.5454	0.341919	NA	NA
CD62L- monocyte Absolute Count || id:ebi-a-GCST90001450	Crohn's disease	Weighted median	16	-0.0886669	0.0665543	0.182778	0.91515	0.803231	1.04266	NA	NA	NA	NA
CD62L- monocyte %monocyte || id:ebi-a-GCST90001451	Crohn's disease	Inverse variance weighted	19	0.0186269	0.03881	0.631261	1.0188	0.944178	1.09932	20.1757	0.323013	0.00473039	0.861337
CD62L- monocyte %monocyte || id:ebi-a-GCST90001451	Crohn's disease	MR Egger	19	-0.00263097	0.126336	0.983628	0.997372	0.778606	1.27761	20.1385	0.267207	NA	NA
CD62L- monocyte %monocyte || id:ebi-a-GCST90001451	Crohn's disease	Weighted median	19	0.00583578	0.0539546	0.913868	1.00585	0.904914	1.11805	NA	NA	NA	NA
CD11c+ CD62L- monocyte Absolute Count || id:ebi-a-GCST90001452	Crohn's disease	Inverse variance weighted	17	0.0398933	0.057087	0.484667	1.0407	0.930533	1.16391	18.42	0.29988	-0.0299926	0.416848
CD11c+ CD62L- monocyte Absolute Count || id:ebi-a-GCST90001452	Crohn's disease	MR Egger	17	0.208899	0.210461	0.336657	1.23232	0.815786	1.86154	17.602	0.284168	NA	NA
CD11c+ CD62L- monocyte Absolute Count || id:ebi-a-GCST90001452	Crohn's disease	Weighted median	17	0.0101314	0.0740095	0.891115	1.01018	0.873779	1.16788	NA	NA	NA	NA
CD11c+ CD62L- monocyte %monocyte || id:ebi-a-GCST90001453	Crohn's disease	Inverse variance weighted	15	0.0307796	0.0527841	0.559811	1.03126	0.929901	1.14366	12.2951	0.582619	0.0335884	0.339234
CD11c+ CD62L- monocyte %monocyte || id:ebi-a-GCST90001453	Crohn's disease	MR Egger	15	-0.140814	0.180828	0.450086	0.86865	0.609427	1.23814	11.3107	0.584805	NA	NA
CD11c+ CD62L- monocyte %monocyte || id:ebi-a-GCST90001453	Crohn's disease	Weighted median	15	0.0445467	0.0747972	0.551465	1.04555	0.902979	1.21064	NA	NA	NA	NA
CD62L- HLA DR++ monocyte Absolute Count || id:ebi-a-GCST90001454	Crohn's disease	Inverse variance weighted	12	0.127395	0.0596597	0.0327311	1.13587	1.01052	1.27676	7.83582	0.727931	-0.0263332	0.480374
CD62L- HLA DR++ monocyte Absolute Count || id:ebi-a-GCST90001454	Crohn's disease	MR Egger	12	0.304719	0.249155	0.249366	1.35624	0.832248	2.21016	7.2985	0.696996	NA	NA
CD62L- HLA DR++ monocyte Absolute Count || id:ebi-a-GCST90001454	Crohn's disease	Weighted median	12	0.106646	0.0783974	0.173725	1.11254	0.954076	1.29733	NA	NA	NA	NA
CD62L- HLA DR++ monocyte %monocyte || id:ebi-a-GCST90001455	Crohn's disease	Inverse variance weighted	9	-0.00689231	0.0625721	0.91229	0.993131	0.878505	1.12271	8.30709	0.404062	0.0231975	0.534178
CD62L- HLA DR++ monocyte %monocyte || id:ebi-a-GCST90001455	Crohn's disease	MR Egger	9	-0.135568	0.207276	0.533971	0.87322	0.581683	1.31087	7.82914	0.347901	NA	NA
CD62L- HLA DR++ monocyte %monocyte || id:ebi-a-GCST90001455	Crohn's disease	Weighted median	9	-0.0880979	0.0825331	0.28578	0.915671	0.778908	1.07645	NA	NA	NA	NA
CD11c+ HLA DR++ monocyte Absolute Count || id:ebi-a-GCST90001456	Crohn's disease	Inverse variance weighted	11	0.0216847	0.0715503	0.761837	1.02192	0.888204	1.17577	12.1459	0.275409	-0.021869	0.693154
CD11c+ HLA DR++ monocyte Absolute Count || id:ebi-a-GCST90001456	Crohn's disease	MR Egger	11	0.161564	0.351294	0.656488	1.17535	0.59039	2.33988	11.9259	0.217521	NA	NA
CD11c+ HLA DR++ monocyte Absolute Count || id:ebi-a-GCST90001456	Crohn's disease	Weighted median	11	0.0131832	0.0933947	0.887747	1.01327	0.843774	1.21681	NA	NA	NA	NA
CD11c+ HLA DR++ monocyte %monocyte || id:ebi-a-GCST90001457	Crohn's disease	Inverse variance weighted	11	0.00207899	0.0678808	0.975567	1.00208	0.877246	1.14468	12.9482	0.226585	0.046968	0.242774
CD11c+ HLA DR++ monocyte %monocyte || id:ebi-a-GCST90001457	Crohn's disease	MR Egger	11	-0.28077	0.235696	0.264028	0.755202	0.475811	1.19865	11.0324	0.273497	NA	NA
CD11c+ HLA DR++ monocyte %monocyte || id:ebi-a-GCST90001457	Crohn's disease	Weighted median	11	-0.0368849	0.0879399	0.6749	0.963787	0.811195	1.14508	NA	NA	NA	NA
Myeloid Dendritic Cell Absolute Count || id:ebi-a-GCST90001458	Crohn's disease	Inverse variance weighted	12	-0.0786642	0.0463515	0.0896734	0.92435	0.844076	1.01226	12.7595	0.309335	0.0193126	0.274173
Myeloid Dendritic Cell Absolute Count || id:ebi-a-GCST90001458	Crohn's disease	MR Egger	12	-0.157524	0.0820372	0.0837886	0.854257	0.727373	1.00327	11.2532	0.338137	NA	NA
Myeloid Dendritic Cell Absolute Count || id:ebi-a-GCST90001458	Crohn's disease	Weighted median	12	-0.110813	0.0556197	0.0463347	0.895106	0.802657	0.998203	NA	NA	NA	NA
Myeloid Dendritic Cell %Dendritic Cell || id:ebi-a-GCST90001459	Crohn's disease	Inverse variance weighted	20	0.0177914	0.0575406	0.757171	1.01795	0.909384	1.13948	42.6519	0.00144606	0.0417204	0.0658595
Myeloid Dendritic Cell %Dendritic Cell || id:ebi-a-GCST90001459	Crohn's disease	MR Egger	20	-0.167072	0.108587	0.141294	0.846139	0.683928	1.04682	35.16	0.00902364	NA	NA
Myeloid Dendritic Cell %Dendritic Cell || id:ebi-a-GCST90001459	Crohn's disease	Weighted median	20	-0.0935706	0.0566603	0.0986507	0.910674	0.814953	1.01764	NA	NA	NA	NA
Plasmacytoid Dendritic Cell Absolute Count || id:ebi-a-GCST90001460	Crohn's disease	Inverse variance weighted	16	-0.0597261	0.0647158	0.356061	0.942023	0.829801	1.06942	29.1851	0.015224	-0.0144501	0.708397
Plasmacytoid Dendritic Cell Absolute Count || id:ebi-a-GCST90001460	Crohn's disease	MR Egger	16	0.0200345	0.219318	0.928509	1.02024	0.663764	1.56815	28.8845	0.0108329	NA	NA
Plasmacytoid Dendritic Cell Absolute Count || id:ebi-a-GCST90001460	Crohn's disease	Weighted median	16	-0.00718273	0.077049	0.925726	0.992843	0.85368	1.15469	NA	NA	NA	NA
Dendritic Cell Absolute Count || id:ebi-a-GCST90001461	Crohn's disease	Inverse variance weighted	17	-0.0209904	0.0532331	0.693351	0.979228	0.882208	1.08692	27.8459	0.0329854	0.00859881	0.697959
Dendritic Cell Absolute Count || id:ebi-a-GCST90001461	Crohn's disease	MR Egger	17	-0.0570969	0.106401	0.599398	0.944503	0.766714	1.16352	27.5584	0.0245026	NA	NA
Dendritic Cell Absolute Count || id:ebi-a-GCST90001461	Crohn's disease	Weighted median	17	-0.116866	0.0593629	0.0489914	0.889705	0.791982	0.999486	NA	NA	NA	NA
CD62L- Dendritic Cell Absolute Count || id:ebi-a-GCST90001462	Crohn's disease	Inverse variance weighted	13	-0.0473843	0.0413422	0.251734	0.953721	0.879488	1.03422	12.4892	0.407236	0.0320064	0.0960242
CD62L- Dendritic Cell Absolute Count || id:ebi-a-GCST90001462	Crohn's disease	MR Egger	13	-0.140649	0.065328	0.0543653	0.868794	0.764379	0.987473	9.17615	0.605637	NA	NA
CD62L- Dendritic Cell Absolute Count || id:ebi-a-GCST90001462	Crohn's disease	Weighted median	13	-0.0828071	0.0501203	0.0985004	0.920529	0.8344	1.01555	NA	NA	NA	NA
CD62L- Dendritic Cell %Dendritic Cell || id:ebi-a-GCST90001463	Crohn's disease	Inverse variance weighted	15	-0.0257963	0.039373	0.512354	0.974534	0.902156	1.05272	14.7496	0.395483	0.0291185	0.07356
CD62L- Dendritic Cell %Dendritic Cell || id:ebi-a-GCST90001463	Crohn's disease	MR Egger	15	-0.121806	0.0624886	0.0731753	0.88532	0.783266	1.00067	10.9615	0.614039	NA	NA
CD62L- Dendritic Cell %Dendritic Cell || id:ebi-a-GCST90001463	Crohn's disease	Weighted median	15	-0.0806013	0.0507289	0.112092	0.922561	0.835245	1.01901	NA	NA	NA	NA
CD86+ myeloid Dendritic Cell Absolute Count || id:ebi-a-GCST90001464	Crohn's disease	Inverse variance weighted	12	-0.0535074	0.0447939	0.232273	0.947899	0.868226	1.03488	14.5744	0.202823	0.0261803	0.189393
CD86+ myeloid Dendritic Cell Absolute Count || id:ebi-a-GCST90001464	Crohn's disease	MR Egger	12	-0.126548	0.0673215	0.0895596	0.881132	0.772211	1.00542	12.1625	0.274328	NA	NA
CD86+ myeloid Dendritic Cell Absolute Count || id:ebi-a-GCST90001464	Crohn's disease	Weighted median	12	-0.0799284	0.0464401	0.0852312	0.923182	0.842863	1.01116	NA	NA	NA	NA
CD86+ myeloid Dendritic Cell %Dendritic Cell || id:ebi-a-GCST90001465	Crohn's disease	Inverse variance weighted	10	-0.0676448	0.0434289	0.119328	0.934592	0.858331	1.01763	10.2804	0.328269	0.00889927	0.661111
CD86+ myeloid Dendritic Cell %Dendritic Cell || id:ebi-a-GCST90001465	Crohn's disease	MR Egger	10	-0.0909054	0.0684122	0.220567	0.913104	0.798522	1.04413	10.0209	0.263563	NA	NA
CD86+ myeloid Dendritic Cell %Dendritic Cell || id:ebi-a-GCST90001465	Crohn's disease	Weighted median	10	-0.0878096	0.0467314	0.060241	0.915935	0.835769	1.00379	NA	NA	NA	NA
CD86+ plasmacytoid Dendritic Cell Absolute Count || id:ebi-a-GCST90001466	Crohn's disease	Inverse variance weighted	12	-0.0115652	0.0714684	0.871446	0.988501	0.859295	1.13714	4.73992	0.943105	-0.0200015	0.552415
CD86+ plasmacytoid Dendritic Cell Absolute Count || id:ebi-a-GCST90001466	Crohn's disease	MR Egger	12	0.118129	0.222729	0.607431	1.12539	0.727298	1.74138	4.36193	0.929546	NA	NA
CD86+ plasmacytoid Dendritic Cell Absolute Count || id:ebi-a-GCST90001466	Crohn's disease	Weighted median	12	-0.0278375	0.0930722	0.764867	0.972546	0.810374	1.16717	NA	NA	NA	NA
CD86+ plasmacytoid Dendritic Cell %Dendritic Cell || id:ebi-a-GCST90001467	Crohn's disease	Inverse variance weighted	17	-0.0611262	0.0488673	0.210985	0.940705	0.854784	1.03526	16.5259	0.416895	-0.0407128	0.112633
CD86+ plasmacytoid Dendritic Cell %Dendritic Cell || id:ebi-a-GCST90001467	Crohn's disease	MR Egger	17	0.181677	0.151891	0.25022	1.19923	0.89045	1.61508	13.686	0.549465	NA	NA
CD86+ plasmacytoid Dendritic Cell %Dendritic Cell || id:ebi-a-GCST90001467	Crohn's disease	Weighted median	17	-0.0326746	0.0703027	0.642096	0.967853	0.84327	1.11084	NA	NA	NA	NA
CD62L- myeloid Dendritic Cell Absolute Count || id:ebi-a-GCST90001468	Crohn's disease	Inverse variance weighted	15	-0.0392384	0.0355395	0.269559	0.961521	0.896824	1.03089	8.43002	0.865743	0.0282407	0.113393
CD62L- myeloid Dendritic Cell Absolute Count || id:ebi-a-GCST90001468	Crohn's disease	MR Egger	15	-0.120047	0.0594068	0.0643981	0.886879	0.789399	0.996397	5.54844	0.961057	NA	NA
CD62L- myeloid Dendritic Cell Absolute Count || id:ebi-a-GCST90001468	Crohn's disease	Weighted median	15	-0.0727804	0.0471631	0.122791	0.929805	0.847707	1.01985	NA	NA	NA	NA
CD62L- myeloid Dendritic Cell %Dendritic Cell || id:ebi-a-GCST90001469	Crohn's disease	Inverse variance weighted	17	-0.0627733	0.0341404	0.0659621	0.939156	0.878369	1.00415	9.89168	0.872224	0.00454598	0.763963
CD62L- myeloid Dendritic Cell %Dendritic Cell || id:ebi-a-GCST90001469	Crohn's disease	MR Egger	17	-0.0769999	0.0577061	0.201994	0.92589	0.826873	1.03676	9.79817	0.83224	NA	NA
CD62L- myeloid Dendritic Cell %Dendritic Cell || id:ebi-a-GCST90001469	Crohn's disease	Weighted median	17	-0.0855801	0.0454549	0.0597345	0.91798	0.839733	1.00352	NA	NA	NA	NA
CD62L- plasmacytoid Dendritic Cell Absolute Count || id:ebi-a-GCST90001470	Crohn's disease	Inverse variance weighted	18	-0.000212256	0.0516601	0.996722	0.999788	0.903512	1.10632	25.7885	0.0784018	0.00989732	0.715822
CD62L- plasmacytoid Dendritic Cell Absolute Count || id:ebi-a-GCST90001470	Crohn's disease	MR Egger	18	-0.0500948	0.144679	0.733667	0.951139	0.716294	1.26298	25.569	0.0604022	NA	NA
CD62L- plasmacytoid Dendritic Cell Absolute Count || id:ebi-a-GCST90001470	Crohn's disease	Weighted median	18	-0.0344932	0.0640233	0.590053	0.966095	0.852162	1.09526	NA	NA	NA	NA
CD62L- plasmacytoid Dendritic Cell %Dendritic Cell || id:ebi-a-GCST90001471	Crohn's disease	Inverse variance weighted	14	-0.00724846	0.0599086	0.903697	0.992778	0.882789	1.11647	22.6271	0.0463751	-0.0184387	0.554572
CD62L- plasmacytoid Dendritic Cell %Dendritic Cell || id:ebi-a-GCST90001471	Crohn's disease	MR Egger	14	0.0802454	0.15648	0.617388	1.08355	0.797355	1.47248	21.9511	0.038072	NA	NA
CD62L- plasmacytoid Dendritic Cell %Dendritic Cell || id:ebi-a-GCST90001471	Crohn's disease	Weighted median	14	-0.112041	0.0679846	0.0993439	0.894007	0.782477	1.02143	NA	NA	NA	NA
CD62L- CD86+ myeloid Dendritic Cell Absolute Count || id:ebi-a-GCST90001472	Crohn's disease	Inverse variance weighted	12	-0.0229018	0.0319801	0.473913	0.977358	0.917977	1.04058	8.46798	0.67087	0.0379206	0.0515382
CD62L- CD86+ myeloid Dendritic Cell Absolute Count || id:ebi-a-GCST90001472	Crohn's disease	MR Egger	12	-0.11427	0.0522646	0.0536636	0.892017	0.805164	0.988238	3.58275	0.964214	NA	NA
CD62L- CD86+ myeloid Dendritic Cell Absolute Count || id:ebi-a-GCST90001472	Crohn's disease	Weighted median	12	-0.0639635	0.0382504	0.0944791	0.938039	0.870285	1.01107	NA	NA	NA	NA
CD62L- CD86+ myeloid Dendritic Cell %Dendritic Cell || id:ebi-a-GCST90001473	Crohn's disease	Inverse variance weighted	14	-0.02575	0.032111	0.422608	0.974579	0.915131	1.03789	10.3674	0.663647	0.0255974	0.103699
CD62L- CD86+ myeloid Dendritic Cell %Dendritic Cell || id:ebi-a-GCST90001473	Crohn's disease	MR Egger	14	-0.0929428	0.0498722	0.0870194	0.911246	0.826387	1.00482	7.26682	0.839489	NA	NA
CD62L- CD86+ myeloid Dendritic Cell %Dendritic Cell || id:ebi-a-GCST90001473	Crohn's disease	Weighted median	14	-0.0497015	0.0375359	0.185468	0.951513	0.884023	1.02416	NA	NA	NA	NA
Plasmacytoid Dendritic Cell %Dendritic Cell || id:ebi-a-GCST90001474	Crohn's disease	Inverse variance weighted	20	-0.015767	0.0459995	0.731776	0.984357	0.899491	1.07723	30.0846	0.0507316	-0.0254677	0.201644
Plasmacytoid Dendritic Cell %Dendritic Cell || id:ebi-a-GCST90001474	Crohn's disease	MR Egger	20	0.0998755	0.0982275	0.322733	1.10503	0.911512	1.33964	27.4099	0.0716216	NA	NA
Plasmacytoid Dendritic Cell %Dendritic Cell || id:ebi-a-GCST90001474	Crohn's disease	Weighted median	20	0.0745716	0.0532052	0.161039	1.07742	0.970726	1.19585	NA	NA	NA	NA
HLA DR++ monocyte %monocyte || id:ebi-a-GCST90001475	Crohn's disease	Inverse variance weighted	12	0.0513239	0.0536203	0.33848	1.05266	0.947648	1.16932	8.02474	0.711086	-0.00307959	0.924918
HLA DR++ monocyte %monocyte || id:ebi-a-GCST90001475	Crohn's disease	MR Egger	12	0.0683828	0.184477	0.718604	1.07078	0.745879	1.53719	8.0154	0.627332	NA	NA
HLA DR++ monocyte %monocyte || id:ebi-a-GCST90001475	Crohn's disease	Weighted median	12	0.0526804	0.0718461	0.463413	1.05409	0.915635	1.21349	NA	NA	NA	NA
HLA DR++ monocyte %leukocyte || id:ebi-a-GCST90001476	Crohn's disease	Inverse variance weighted	3	-0.0590557	0.14421	0.682164	0.942654	0.710556	1.25057	7.57212	0.0226848	0.228341	0.499178
HLA DR++ monocyte %leukocyte || id:ebi-a-GCST90001476	Crohn's disease	MR Egger	3	-1.01402	0.963328	0.483683	0.362758	0.0549055	2.39673	3.77628	0.051984	NA	NA
HLA DR++ monocyte %leukocyte || id:ebi-a-GCST90001476	Crohn's disease	Weighted median	3	-0.09766	0.100471	0.33104	0.906957	0.744842	1.10436	NA	NA	NA	NA
HLA DR++ monocyte Absolute Count || id:ebi-a-GCST90001477	Crohn's disease	Inverse variance weighted	12	0.00510992	0.0607525	0.932969	1.00512	0.892289	1.13223	11.6468	0.390767	-0.0794749	0.0431043
HLA DR++ monocyte Absolute Count || id:ebi-a-GCST90001477	Crohn's disease	MR Egger	12	0.43812	0.196107	0.0494978	1.54979	1.05522	2.27616	6.28543	0.790739	NA	NA
HLA DR++ monocyte Absolute Count || id:ebi-a-GCST90001477	Crohn's disease	Weighted median	12	-0.0307952	0.078808	0.695973	0.969674	0.830889	1.13164	NA	NA	NA	NA
CD4 regulatory T cell %CD4+ T cell || id:ebi-a-GCST90001478	Crohn's disease	Inverse variance weighted	14	-0.0396798	0.0640332	0.535472	0.961097	0.847737	1.08962	18.4582	0.140884	0.0100416	0.799954
CD4 regulatory T cell %CD4+ T cell || id:ebi-a-GCST90001478	Crohn's disease	MR Egger	14	-0.0913504	0.210212	0.671591	0.912698	0.604493	1.37804	18.3555	0.105314	NA	NA
CD4 regulatory T cell %CD4+ T cell || id:ebi-a-GCST90001478	Crohn's disease	Weighted median	14	-0.118959	0.0759717	0.117389	0.887845	0.765012	1.0304	NA	NA	NA	NA
CD4 regulatory T cell %T cell || id:ebi-a-GCST90001479	Crohn's disease	Inverse variance weighted	13	0.00646705	0.0721395	0.928568	1.00649	0.87378	1.15935	23.1822	0.0262183	0.00245316	0.950071
CD4 regulatory T cell %T cell || id:ebi-a-GCST90001479	Crohn's disease	MR Egger	13	-0.00714415	0.225431	0.975286	0.992881	0.638273	1.5445	23.1736	0.0167049	NA	NA
CD4 regulatory T cell %T cell || id:ebi-a-GCST90001479	Crohn's disease	Weighted median	13	-0.0154809	0.0751995	0.836897	0.984638	0.8497	1.14101	NA	NA	NA	NA
Resting CD4 regulatory T cell Absolute Count || id:ebi-a-GCST90001480	Crohn's disease	Inverse variance weighted	15	-0.0432997	0.0569468	0.447043	0.957624	0.856488	1.0707	17.5949	0.225861	-0.0499341	0.300046
Resting CD4 regulatory T cell Absolute Count || id:ebi-a-GCST90001480	Crohn's disease	MR Egger	15	0.208987	0.240496	0.400615	1.23243	0.769215	1.97459	16.1477	0.241244	NA	NA
Resting CD4 regulatory T cell Absolute Count || id:ebi-a-GCST90001480	Crohn's disease	Weighted median	15	-0.00738666	0.0755754	0.92214	0.992641	0.855975	1.15113	NA	NA	NA	NA
Resting CD4 regulatory T cell %CD4 regulatory T cell || id:ebi-a-GCST90001481	Crohn's disease	Inverse variance weighted	12	-0.118601	0.0815044	0.14563	0.888163	0.757032	1.04201	28.952	0.00230919	-0.0976098	0.0783224
Resting CD4 regulatory T cell %CD4 regulatory T cell || id:ebi-a-GCST90001481	Crohn's disease	MR Egger	12	0.294471	0.222832	0.215772	1.34242	0.867378	2.07762	20.9115	0.0217193	NA	NA
Resting CD4 regulatory T cell %CD4 regulatory T cell || id:ebi-a-GCST90001481	Crohn's disease	Weighted median	12	-0.04723	0.0766708	0.537888	0.953868	0.820776	1.10854	NA	NA	NA	NA
Resting CD4 regulatory T cell %CD4+ T cell || id:ebi-a-GCST90001482	Crohn's disease	Inverse variance weighted	17	-0.0659635	0.0487904	0.176383	0.936165	0.850788	1.03011	15.9589	0.455832	-0.0233357	0.59762
Resting CD4 regulatory T cell %CD4+ T cell || id:ebi-a-GCST90001482	Crohn's disease	MR Egger	17	0.0385139	0.20005	0.849916	1.03927	0.702166	1.5382	15.6554	0.405316	NA	NA
Resting CD4 regulatory T cell %CD4+ T cell || id:ebi-a-GCST90001482	Crohn's disease	Weighted median	17	0.0326233	0.0666565	0.624541	1.03316	0.906628	1.17735	NA	NA	NA	NA
CD39+ resting CD4 regulatory T cell Absolute Count || id:ebi-a-GCST90001483	Crohn's disease	Inverse variance weighted	15	-0.0443949	0.0289267	0.124849	0.956576	0.903851	1.01238	18.797	0.172852	0.0299907	0.0528429
CD39+ resting CD4 regulatory T cell Absolute Count || id:ebi-a-GCST90001483	Crohn's disease	MR Egger	15	-0.117913	0.0431187	0.0170313	0.888774	0.816748	0.967152	13.9339	0.378518	NA	NA
CD39+ resting CD4 regulatory T cell Absolute Count || id:ebi-a-GCST90001483	Crohn's disease	Weighted median	15	-0.0769955	0.0286126	0.00712449	0.925894	0.875398	0.979302	NA	NA	NA	NA
CD39+ resting CD4 regulatory T cell %resting CD4 regulatory T cell || id:ebi-a-GCST90001484	Crohn's disease	Inverse variance weighted	17	-0.00418774	0.0368081	0.909418	0.995821	0.926509	1.07032	15.4086	0.494941	0.0118028	0.512439
CD39+ resting CD4 regulatory T cell %resting CD4 regulatory T cell || id:ebi-a-GCST90001484	Crohn's disease	MR Egger	17	-0.0553378	0.0846538	0.523204	0.946166	0.801509	1.11693	14.9584	0.454419	NA	NA
CD39+ resting CD4 regulatory T cell %resting CD4 regulatory T cell || id:ebi-a-GCST90001484	Crohn's disease	Weighted median	17	-0.0499317	0.0524313	0.340931	0.951294	0.85839	1.05425	NA	NA	NA	NA
CD39+ resting CD4 regulatory T cell %CD4 regulatory T cell || id:ebi-a-GCST90001485	Crohn's disease	Inverse variance weighted	19	-0.0270396	0.0275912	0.327082	0.973323	0.922084	1.02741	24.827	0.129756	0.0360172	0.00496335
CD39+ resting CD4 regulatory T cell %CD4 regulatory T cell || id:ebi-a-GCST90001485	Crohn's disease	MR Egger	19	-0.119742	0.0371182	0.00496235	0.887149	0.8249	0.954097	14.4208	0.637124	NA	NA
CD39+ resting CD4 regulatory T cell %CD4 regulatory T cell || id:ebi-a-GCST90001485	Crohn's disease	Weighted median	19	-0.0727218	0.0278592	0.00904534	0.929859	0.880447	0.982045	NA	NA	NA	NA
Activated CD4 regulatory T cell Absolute Count || id:ebi-a-GCST90001486	Crohn's disease	Inverse variance weighted	7	0.0423722	0.0841697	0.614673	1.04328	0.884617	1.23041	6.07257	0.41511	-0.0867583	0.216923
Activated CD4 regulatory T cell Absolute Count || id:ebi-a-GCST90001486	Crohn's disease	MR Egger	7	0.646433	0.435773	0.198076	1.90872	0.812465	4.48414	4.07753	0.538308	NA	NA
Activated CD4 regulatory T cell Absolute Count || id:ebi-a-GCST90001486	Crohn's disease	Weighted median	7	0.00304804	0.107941	0.977472	1.00305	0.811788	1.23938	NA	NA	NA	NA
Activated CD4 regulatory T cell %CD4 regulatory T cell || id:ebi-a-GCST90001487	Crohn's disease	Inverse variance weighted	17	0.0107137	0.0762685	0.888286	1.01077	0.870426	1.17375	34.7171	0.00434402	-0.011901	0.792039
Activated CD4 regulatory T cell %CD4 regulatory T cell || id:ebi-a-GCST90001487	Crohn's disease	MR Egger	17	0.086858	0.294368	0.771988	1.09074	0.612564	1.94219	34.5511	0.00284762	NA	NA
Activated CD4 regulatory T cell %CD4 regulatory T cell || id:ebi-a-GCST90001487	Crohn's disease	Weighted median	17	0.0580256	0.0833033	0.486079	1.05974	0.9001	1.2477	NA	NA	NA	NA
Activated CD4 regulatory T cell %CD4+ T cell || id:ebi-a-GCST90001488	Crohn's disease	Inverse variance weighted	10	-0.125153	0.0808076	0.121435	0.882362	0.753116	1.03379	11.9838	0.214223	-0.0156545	0.810442
Activated CD4 regulatory T cell %CD4+ T cell || id:ebi-a-GCST90001488	Crohn's disease	MR Egger	10	-0.0126203	0.46187	0.97887	0.987459	0.399363	2.44158	11.8925	0.156067	NA	NA
Activated CD4 regulatory T cell %CD4+ T cell || id:ebi-a-GCST90001488	Crohn's disease	Weighted median	10	0.0180414	0.0928617	0.845955	1.01821	0.84877	1.22146	NA	NA	NA	NA
CD39+ activated CD4 regulatory T cell Absolute Count || id:ebi-a-GCST90001489	Crohn's disease	Inverse variance weighted	24	0.031508	0.0409979	0.442174	1.03201	0.952326	1.11836	35.6897	0.0443599	0.0619037	0.00383369
CD39+ activated CD4 regulatory T cell Absolute Count || id:ebi-a-GCST90001489	Crohn's disease	MR Egger	24	-0.248866	0.0933706	0.0141334	0.779684	0.649292	0.936262	24.2006	0.336802	NA	NA
CD39+ activated CD4 regulatory T cell Absolute Count || id:ebi-a-GCST90001489	Crohn's disease	Weighted median	24	-0.0256589	0.0499872	0.607735	0.974667	0.883703	1.07499	NA	NA	NA	NA
CD39+ activated CD4 regulatory T cell %activated CD4 regulatory T cell || id:ebi-a-GCST90001490	Crohn's disease	Inverse variance weighted	3	0.0908083	0.117848	0.440971	1.09506	0.869207	1.3796	0.368674	0.831656	-0.0392851	0.719224
CD39+ activated CD4 regulatory T cell %activated CD4 regulatory T cell || id:ebi-a-GCST90001490	Crohn's disease	MR Egger	3	0.313665	0.486587	0.63548	1.36843	0.527269	3.55152	0.145838	0.702545	NA	NA
CD39+ activated CD4 regulatory T cell %activated CD4 regulatory T cell || id:ebi-a-GCST90001490	Crohn's disease	Weighted median	3	0.0737362	0.132131	0.576807	1.07652	0.830905	1.39475	NA	NA	NA	NA
CD39+ activated CD4 regulatory T cell %CD4 regulatory T cell || id:ebi-a-GCST90001491	Crohn's disease	Inverse variance weighted	14	-0.00549827	0.040136	0.891038	0.994517	0.91928	1.07591	11.9158	0.534558	0.03704	0.148887
CD39+ activated CD4 regulatory T cell %CD4 regulatory T cell || id:ebi-a-GCST90001491	Crohn's disease	MR Egger	14	-0.162441	0.109372	0.163278	0.850066	0.686046	1.0533	9.53634	0.656565	NA	NA
CD39+ activated CD4 regulatory T cell %CD4 regulatory T cell || id:ebi-a-GCST90001491	Crohn's disease	Weighted median	14	-0.0624571	0.0535222	0.243235	0.939453	0.845894	1.04336	NA	NA	NA	NA
Secreting CD4 regulatory T cell Absolute Count || id:ebi-a-GCST90001492	Crohn's disease	Inverse variance weighted	8	0.185159	0.0847457	0.0288981	1.20341	1.01924	1.42086	13.0172	0.0716913	-0.000845636	0.984108
Secreting CD4 regulatory T cell Absolute Count || id:ebi-a-GCST90001492	Crohn's disease	MR Egger	8	0.189549	0.230385	0.442115	1.2087	0.769507	1.89857	13.0162	0.042779	NA	NA
Secreting CD4 regulatory T cell Absolute Count || id:ebi-a-GCST90001492	Crohn's disease	Weighted median	8	0.152025	0.0960521	0.113482	1.16419	0.964412	1.40535	NA	NA	NA	NA
Secreting CD4 regulatory T cell %CD4 regulatory T cell || id:ebi-a-GCST90001493	Crohn's disease	Inverse variance weighted	16	0.096749	0.0548734	0.0778785	1.10158	0.989255	1.22667	23.2942	0.0780894	0.0322844	0.274309
Secreting CD4 regulatory T cell %CD4 regulatory T cell || id:ebi-a-GCST90001493	Crohn's disease	MR Egger	16	-0.0667988	0.153672	0.670416	0.935383	0.69212	1.26415	21.3226	0.0936472	NA	NA
Secreting CD4 regulatory T cell %CD4 regulatory T cell || id:ebi-a-GCST90001493	Crohn's disease	Weighted median	16	0.0877242	0.0639498	0.170137	1.09169	0.963081	1.23747	NA	NA	NA	NA
Secreting CD4 regulatory T cell %CD4+ T cell || id:ebi-a-GCST90001494	Crohn's disease	Inverse variance weighted	16	0.0116236	0.0461683	0.801221	1.01169	0.924164	1.10751	11.2855	0.732109	0.00721974	0.787344
Secreting CD4 regulatory T cell %CD4+ T cell || id:ebi-a-GCST90001494	Crohn's disease	MR Egger	16	-0.0310289	0.161834	0.850704	0.969448	0.705942	1.33131	11.2098	0.669479	NA	NA
Secreting CD4 regulatory T cell %CD4+ T cell || id:ebi-a-GCST90001494	Crohn's disease	Weighted median	16	0.0717995	0.0643616	0.264608	1.07444	0.947101	1.2189	NA	NA	NA	NA
CD39+ secreting CD4 regulatory T cell Absolute Count || id:ebi-a-GCST90001495	Crohn's disease	Inverse variance weighted	19	0.00677403	0.0342222	0.84309	1.0068	0.941481	1.07664	13.6416	0.752138	0.00774299	0.738568
CD39+ secreting CD4 regulatory T cell Absolute Count || id:ebi-a-GCST90001495	Crohn's disease	MR Egger	19	-0.024529	0.0984105	0.806152	0.975769	0.804597	1.18336	13.5265	0.70029	NA	NA
CD39+ secreting CD4 regulatory T cell Absolute Count || id:ebi-a-GCST90001495	Crohn's disease	Weighted median	19	-0.00638866	0.0479039	0.893905	0.993632	0.904584	1.09145	NA	NA	NA	NA
CD39+ secreting CD4 regulatory T cell %secreting CD4 regulatory T cell || id:ebi-a-GCST90001496	Crohn's disease	Inverse variance weighted	13	-0.0450139	0.0396277	0.25599	0.955984	0.884543	1.0332	7.27513	0.838909	-0.0211955	0.286201
CD39+ secreting CD4 regulatory T cell %secreting CD4 regulatory T cell || id:ebi-a-GCST90001496	Crohn's disease	MR Egger	13	0.0369798	0.0831935	0.665297	1.03767	0.881545	1.22145	6.01869	0.872114	NA	NA
CD39+ secreting CD4 regulatory T cell %secreting CD4 regulatory T cell || id:ebi-a-GCST90001496	Crohn's disease	Weighted median	13	-0.0569902	0.0559858	0.308706	0.944603	0.846435	1.05416	NA	NA	NA	NA
CD39+ secreting CD4 regulatory T cell %CD4 regulatory T cell || id:ebi-a-GCST90001497	Crohn's disease	Inverse variance weighted	12	-0.00868092	0.0409348	0.832055	0.991357	0.914925	1.07417	8.45269	0.67227	-0.0135284	0.577603
CD39+ secreting CD4 regulatory T cell %CD4 regulatory T cell || id:ebi-a-GCST90001497	Crohn's disease	MR Egger	12	0.0406956	0.0950481	0.677611	1.04154	0.864505	1.25482	8.12136	0.616984	NA	NA
CD39+ secreting CD4 regulatory T cell %CD4 regulatory T cell || id:ebi-a-GCST90001497	Crohn's disease	Weighted median	12	-0.00285652	0.0551823	0.958716	0.997148	0.894926	1.11104	NA	NA	NA	NA
Activated & resting CD4 regulatory T cell Absolute Count || id:ebi-a-GCST90001498	Crohn's disease	Inverse variance weighted	11	-0.0149038	0.068981	0.828944	0.985207	0.860616	1.12783	12.1666	0.274059	-0.0386155	0.363189
Activated & resting CD4 regulatory T cell Absolute Count || id:ebi-a-GCST90001498	Crohn's disease	MR Egger	11	0.231994	0.266923	0.40735	1.26111	0.747385	2.12796	11.0412	0.272894	NA	NA
Activated & resting CD4 regulatory T cell Absolute Count || id:ebi-a-GCST90001498	Crohn's disease	Weighted median	11	0.0801745	0.0816445	0.326103	1.08348	0.923256	1.2715	NA	NA	NA	NA
Activated & resting CD4 regulatory T cell %CD4 regulatory T cell || id:ebi-a-GCST90001499	Crohn's disease	Inverse variance weighted	15	-0.103134	0.0524948	0.0494535	0.902006	0.813813	0.999755	19.4539	0.14832	-0.0268791	0.339359
Activated & resting CD4 regulatory T cell %CD4 regulatory T cell || id:ebi-a-GCST90001499	Crohn's disease	MR Egger	15	0.0332815	0.147221	0.824666	1.03384	0.774706	1.37966	18.0852	0.15431	NA	NA
Activated & resting CD4 regulatory T cell %CD4 regulatory T cell || id:ebi-a-GCST90001499	Crohn's disease	Weighted median	15	-0.0639044	0.064565	0.322287	0.938095	0.826586	1.06465	NA	NA	NA	NA
Activated & resting CD4 regulatory T cell %CD4+ T cell || id:ebi-a-GCST90001500	Crohn's disease	Inverse variance weighted	15	0.0671554	0.0646467	0.298895	1.06946	0.942186	1.21393	23.2869	0.055759	0.034142	0.433008
Activated & resting CD4 regulatory T cell %CD4+ T cell || id:ebi-a-GCST90001500	Crohn's disease	MR Egger	15	-0.141923	0.266565	0.603421	0.867688	0.514587	1.46308	22.1704	0.0527773	NA	NA
Activated & resting CD4 regulatory T cell %CD4+ T cell || id:ebi-a-GCST90001500	Crohn's disease	Weighted median	15	0.045217	0.0773841	0.559006	1.04625	0.899015	1.21761	NA	NA	NA	NA
Activated & secreting CD4 regulatory T cell Absolute Count || id:ebi-a-GCST90001501	Crohn's disease	Inverse variance weighted	8	0.170139	0.0660928	0.0100462	1.18547	1.04143	1.34943	7.7486	0.355284	-0.0120587	0.744997
Activated & secreting CD4 regulatory T cell Absolute Count || id:ebi-a-GCST90001501	Crohn's disease	MR Egger	8	0.229975	0.189363	0.270194	1.25857	0.868336	1.82417	7.6016	0.268767	NA	NA
Activated & secreting CD4 regulatory T cell Absolute Count || id:ebi-a-GCST90001501	Crohn's disease	Weighted median	8	0.204724	0.0897976	0.0226173	1.22719	1.02914	1.46335	NA	NA	NA	NA
Activated & secreting CD4 regulatory T cell %CD4 regulatory T cell || id:ebi-a-GCST90001502	Crohn's disease	Inverse variance weighted	14	0.103754	0.0666211	0.119382	1.10933	0.973533	1.26406	26.3178	0.0154052	0.0779875	0.0329307
Activated & secreting CD4 regulatory T cell %CD4 regulatory T cell || id:ebi-a-GCST90001502	Crohn's disease	MR Egger	14	-0.265255	0.163372	0.130416	0.76701	0.556847	1.05649	17.7357	0.123954	NA	NA
Activated & secreting CD4 regulatory T cell %CD4 regulatory T cell || id:ebi-a-GCST90001502	Crohn's disease	Weighted median	14	0.0523726	0.0695682	0.451556	1.05377	0.919449	1.20771	NA	NA	NA	NA
Activated & secreting CD4 regulatory T cell %CD4+ T cell || id:ebi-a-GCST90001503	Crohn's disease	Inverse variance weighted	15	-0.0116535	0.0764422	0.878833	0.988414	0.850883	1.14817	37.1218	0.000707048	-0.0443228	0.228353
Activated & secreting CD4 regulatory T cell %CD4+ T cell || id:ebi-a-GCST90001503	Crohn's disease	MR Egger	15	0.232031	0.206783	0.282118	1.26116	0.840916	1.89142	33.0577	0.00167032	NA	NA
Activated & secreting CD4 regulatory T cell %CD4+ T cell || id:ebi-a-GCST90001503	Crohn's disease	Weighted median	15	-0.00570127	0.0787413	0.94228	0.994315	0.852115	1.16025	NA	NA	NA	NA
CD25++ CD4+ T cell Absolute Count || id:ebi-a-GCST90001504	Crohn's disease	Inverse variance weighted	10	0.122249	0.0689191	0.0760949	1.13004	0.98725	1.29347	14.0447	0.120744	-0.0425471	0.272421
CD25++ CD4+ T cell Absolute Count || id:ebi-a-GCST90001504	Crohn's disease	MR Egger	10	0.282241	0.151592	0.099648	1.3261	0.98523	1.7849	11.9668	0.152691	NA	NA
CD25++ CD4+ T cell Absolute Count || id:ebi-a-GCST90001504	Crohn's disease	Weighted median	10	0.17971	0.0745566	0.0159357	1.19687	1.03415	1.3852	NA	NA	NA	NA
CD25++ CD4+ T cell %CD4+ T cell || id:ebi-a-GCST90001505	Crohn's disease	Inverse variance weighted	16	0.00754683	0.0718859	0.916389	1.00758	0.875159	1.16003	40.2319	0.000418332	-0.068	0.0148773
CD25++ CD4+ T cell %CD4+ T cell || id:ebi-a-GCST90001505	Crohn's disease	MR Egger	16	0.276095	0.113721	0.0292651	1.31797	1.05464	1.64705	25.9513	0.0262583	NA	NA
CD25++ CD4+ T cell %CD4+ T cell || id:ebi-a-GCST90001505	Crohn's disease	Weighted median	16	0.135719	0.0622413	0.0292188	1.14536	1.01382	1.29397	NA	NA	NA	NA
CD25++ CD4+ T cell %T cell || id:ebi-a-GCST90001506	Crohn's disease	Inverse variance weighted	13	0.0439176	0.0555179	0.428913	1.0449	0.937164	1.16501	17.7278	0.124208	-0.0513948	0.0241333
CD25++ CD4+ T cell %T cell || id:ebi-a-GCST90001506	Crohn's disease	MR Egger	13	0.267832	0.0971095	0.018621	1.30713	1.08058	1.58117	10.9007	0.45162	NA	NA
CD25++ CD4+ T cell %T cell || id:ebi-a-GCST90001506	Crohn's disease	Weighted median	13	0.037278	0.0726821	0.608028	1.03798	0.900163	1.1969	NA	NA	NA	NA
CD25++ CD45RA+ CD4 not regulatory T cell Absolute Count || id:ebi-a-GCST90001507	Crohn's disease	Inverse variance weighted	15	-0.0957538	0.0579214	0.0982966	0.908688	0.811168	1.01793	21.727	0.0844008	0.0344761	0.442927
CD25++ CD45RA+ CD4 not regulatory T cell Absolute Count || id:ebi-a-GCST90001507	Crohn's disease	MR Egger	15	-0.262366	0.218569	0.251408	0.769229	0.501195	1.18061	20.7284	0.0784771	NA	NA
CD25++ CD45RA+ CD4 not regulatory T cell Absolute Count || id:ebi-a-GCST90001507	Crohn's disease	Weighted median	15	-0.122487	0.0692088	0.0767573	0.884717	0.77249	1.01325	NA	NA	NA	NA
CD25++ CD45RA+ CD4 not regulatory T cell %CD4+ T cell || id:ebi-a-GCST90001508	Crohn's disease	Inverse variance weighted	17	0.0119824	0.0547192	0.826666	1.01205	0.90913	1.12663	24.864	0.0722596	0.00264984	0.939548
CD25++ CD45RA+ CD4 not regulatory T cell %CD4+ T cell || id:ebi-a-GCST90001508	Crohn's disease	MR Egger	17	-0.00264224	0.197875	0.989522	0.997361	0.676734	1.4699	24.8541	0.0519372	NA	NA
CD25++ CD45RA+ CD4 not regulatory T cell %CD4+ T cell || id:ebi-a-GCST90001508	Crohn's disease	Weighted median	17	-0.039654	0.0666663	0.551968	0.961122	0.843395	1.09528	NA	NA	NA	NA
CD25++ CD45RA+ CD4 not regulatory T cell %T cell || id:ebi-a-GCST90001509	Crohn's disease	Inverse variance weighted	12	0.0260443	0.0590983	0.659433	1.02639	0.914125	1.15243	14.1915	0.222579	0.0865278	0.032175
CD25++ CD45RA+ CD4 not regulatory T cell %T cell || id:ebi-a-GCST90001509	Crohn's disease	MR Egger	12	-0.422795	0.18785	0.048122	0.655213	0.4534	0.946855	8.0081	0.628045	NA	NA
CD25++ CD45RA+ CD4 not regulatory T cell %T cell || id:ebi-a-GCST90001509	Crohn's disease	Weighted median	12	-0.0260869	0.0720114	0.717157	0.97425	0.846006	1.12194	NA	NA	NA	NA
CD25++ CD45RA- CD4 not regulatory T cell Absolute Count || id:ebi-a-GCST90001510	Crohn's disease	Inverse variance weighted	7	0.0930488	0.0643194	0.14799	1.09752	0.967522	1.24497	9.15298	0.165156	-0.0581242	0.0799796
CD25++ CD45RA- CD4 not regulatory T cell Absolute Count || id:ebi-a-GCST90001510	Crohn's disease	MR Egger	7	0.277153	0.0988508	0.0378259	1.31937	1.08698	1.60144	4.3518	0.499954	NA	NA
CD25++ CD45RA- CD4 not regulatory T cell Absolute Count || id:ebi-a-GCST90001510	Crohn's disease	Weighted median	7	0.145958	0.066347	0.0278125	1.15715	1.01605	1.31785	NA	NA	NA	NA
CD25++ CD45RA- CD4 not regulatory T cell %CD4+ T cell || id:ebi-a-GCST90001511	Crohn's disease	Inverse variance weighted	16	0.0817652	0.0553669	0.139733	1.0852	0.973601	1.20959	24.4302	0.0581391	-0.0366466	0.141423
CD25++ CD45RA- CD4 not regulatory T cell %CD4+ T cell || id:ebi-a-GCST90001511	Crohn's disease	MR Egger	16	0.209069	0.0973183	0.049674	1.23253	1.01849	1.49155	20.8182	0.106382	NA	NA
CD25++ CD45RA- CD4 not regulatory T cell %CD4+ T cell || id:ebi-a-GCST90001511	Crohn's disease	Weighted median	16	0.144674	0.0546213	0.00808088	1.15566	1.03833	1.28625	NA	NA	NA	NA
CD25++ CD45RA- CD4 not regulatory T cell %T cell || id:ebi-a-GCST90001512	Crohn's disease	Inverse variance weighted	18	0.114457	0.0410212	0.00526769	1.12126	1.03464	1.21514	16.031	0.521641	-0.0366128	0.0561222
CD25++ CD45RA- CD4 not regulatory T cell %T cell || id:ebi-a-GCST90001512	Crohn's disease	MR Egger	18	0.264259	0.0835124	0.00601195	1.30247	1.10581	1.5341	11.7902	0.758294	NA	NA
CD25++ CD45RA- CD4 not regulatory T cell %T cell || id:ebi-a-GCST90001512	Crohn's disease	Weighted median	18	0.157879	0.0602913	0.00882889	1.17103	1.04051	1.31791	NA	NA	NA	NA
CD4 regulatory T cell Absolute Count || id:ebi-a-GCST90001513	Crohn's disease	Inverse variance weighted	14	0.208407	0.0529854	8.38e-05	1.23171	1.11022	1.36651	12.6944	0.471686	0.0548967	0.133911
CD4 regulatory T cell Absolute Count || id:ebi-a-GCST90001513	Crohn's disease	MR Egger	14	-0.0884547	0.192118	0.653448	0.915345	0.628131	1.33389	10.1102	0.606296	NA	NA
CD4 regulatory T cell Absolute Count || id:ebi-a-GCST90001513	Crohn's disease	Weighted median	14	0.190787	0.0760473	0.0121143	1.2102	1.04262	1.40472	NA	NA	NA	NA
Hematopoietic Stem Cell Absolute Count || id:ebi-a-GCST90001514	Crohn's disease	Inverse variance weighted	13	-0.0427174	0.0609152	0.48314	0.958182	0.850347	1.07969	22.4933	0.0323493	0.0191835	0.640574
Hematopoietic Stem Cell Absolute Count || id:ebi-a-GCST90001514	Crohn's disease	MR Egger	13	-0.131372	0.195105	0.514631	0.876892	0.598231	1.28535	22.0316	0.0241292	NA	NA
Hematopoietic Stem Cell Absolute Count || id:ebi-a-GCST90001514	Crohn's disease	Weighted median	13	-0.0469651	0.0667368	0.481597	0.954121	0.837136	1.08745	NA	NA	NA	NA
Immature Myeloid-Derived Suppressor Cells Absolute Count || id:ebi-a-GCST90001515	Crohn's disease	Inverse variance weighted	15	0.0150895	0.0414185	0.715621	1.0152	0.936046	1.10106	21.7824	0.0831983	0.069759	0.00533769
Immature Myeloid-Derived Suppressor Cells Absolute Count || id:ebi-a-GCST90001515	Crohn's disease	MR Egger	15	-0.263107	0.0897025	0.0116437	0.76866	0.64473	0.916411	10.6369	0.641203	NA	NA
Immature Myeloid-Derived Suppressor Cells Absolute Count || id:ebi-a-GCST90001515	Crohn's disease	Weighted median	15	-0.0563574	0.0481191	0.241516	0.945201	0.860131	1.03869	NA	NA	NA	NA
Immature Myeloid-Derived Suppressor Cells %CD33dim HLA DR- CD66b- || id:ebi-a-GCST90001516	Crohn's disease	Inverse variance weighted	13	-0.0691944	0.0373653	0.0640496	0.933145	0.867248	1.00405	7.66499	0.810732	0.00495018	0.851899
Immature Myeloid-Derived Suppressor Cells %CD33dim HLA DR- CD66b- || id:ebi-a-GCST90001516	Crohn's disease	MR Egger	13	-0.0888554	0.109439	0.434056	0.914978	0.738337	1.13388	7.62846	0.746149	NA	NA
Immature Myeloid-Derived Suppressor Cells %CD33dim HLA DR- CD66b- || id:ebi-a-GCST90001516	Crohn's disease	Weighted median	13	-0.0536438	0.0492517	0.276076	0.94777	0.860556	1.04382	NA	NA	NA	NA
CD33+ HLA DR+ Absolute Count || id:ebi-a-GCST90001517	Crohn's disease	Inverse variance weighted	17	0.0422151	0.0354537	0.233768	1.04312	0.973094	1.11818	15.5931	0.4817	-0.00360549	0.889246
CD33+ HLA DR+ Absolute Count || id:ebi-a-GCST90001517	Crohn's disease	MR Egger	17	0.0590196	0.124017	0.641004	1.0608	0.831891	1.35269	15.5723	0.411031	NA	NA
CD33+ HLA DR+ Absolute Count || id:ebi-a-GCST90001517	Crohn's disease	Weighted median	17	0.0753165	0.0495324	0.128373	1.07823	0.978468	1.18815	NA	NA	NA	NA
CD33+ HLA DR+ CD14- Absolute Count || id:ebi-a-GCST90001518	Crohn's disease	Inverse variance weighted	14	0.0662563	0.0371781	0.0747277	1.0685	0.993409	1.14927	9.62512	0.724265	-0.0416105	0.109158
CD33+ HLA DR+ CD14- Absolute Count || id:ebi-a-GCST90001518	Crohn's disease	MR Egger	14	0.250605	0.112833	0.0463531	1.2848	1.02989	1.60281	6.63066	0.881026	NA	NA
CD33+ HLA DR+ CD14- Absolute Count || id:ebi-a-GCST90001518	Crohn's disease	Weighted median	14	0.0654177	0.0524118	0.211976	1.0676	0.963378	1.18311	NA	NA	NA	NA
CD33+ HLA DR+ CD14- %CD33+ HLA DR+ || id:ebi-a-GCST90001519	Crohn's disease	Inverse variance weighted	14	-0.0162703	0.0522382	0.755449	0.983861	0.888112	1.08993	23.3685	0.0374605	0.0112163	0.811727
CD33+ HLA DR+ CD14- %CD33+ HLA DR+ || id:ebi-a-GCST90001519	Crohn's disease	MR Egger	14	-0.0641039	0.203788	0.758497	0.937908	0.62906	1.39839	23.2536	0.0256482	NA	NA
CD33+ HLA DR+ CD14- %CD33+ HLA DR+ || id:ebi-a-GCST90001519	Crohn's disease	Weighted median	14	0.0546079	0.0548723	0.319648	1.05613	0.948435	1.17605	NA	NA	NA	NA
CD33+ HLA DR+ CD14dim Absolute Count || id:ebi-a-GCST90001520	Crohn's disease	Inverse variance weighted	16	-0.0174272	0.0403074	0.665481	0.982724	0.908074	1.06351	16.4877	0.3504	0.0322994	0.326405
CD33+ HLA DR+ CD14dim Absolute Count || id:ebi-a-GCST90001520	Crohn's disease	MR Egger	16	-0.156179	0.142248	0.290759	0.855406	0.647275	1.13046	15.3534	0.354431	NA	NA
CD33+ HLA DR+ CD14dim Absolute Count || id:ebi-a-GCST90001520	Crohn's disease	Weighted median	16	0.0131508	0.0522915	0.801435	1.01324	0.914534	1.12259	NA	NA	NA	NA
CD33+ HLA DR+ CD14dim %CD33+ HLA DR+ || id:ebi-a-GCST90001521	Crohn's disease	Inverse variance weighted	17	0.0830072	0.0598793	0.165673	1.08655	0.966227	1.22186	41.3932	0.000485693	0.0101212	0.84049
CD33+ HLA DR+ CD14dim %CD33+ HLA DR+ || id:ebi-a-GCST90001521	Crohn's disease	MR Egger	17	0.0293211	0.269329	0.914751	1.02976	0.607403	1.74579	41.2778	0.000290046	NA	NA
CD33+ HLA DR+ CD14dim %CD33+ HLA DR+ || id:ebi-a-GCST90001521	Crohn's disease	Weighted median	17	0.0897704	0.0552654	0.104301	1.09392	0.981621	1.21907	NA	NA	NA	NA
CD33- HLA DR- Absolute Count || id:ebi-a-GCST90001522	Crohn's disease	Inverse variance weighted	14	-0.0239759	0.0527543	0.649481	0.976309	0.880404	1.08266	26.9088	0.0128036	0.0475233	0.287738
CD33- HLA DR- Absolute Count || id:ebi-a-GCST90001522	Crohn's disease	MR Egger	14	-0.197078	0.164153	0.253079	0.821127	0.595224	1.13276	24.3932	0.0179749	NA	NA
CD33- HLA DR- Absolute Count || id:ebi-a-GCST90001522	Crohn's disease	Weighted median	14	-0.0597444	0.0611046	0.328203	0.942005	0.83568	1.06186	NA	NA	NA	NA
CD33- HLA DR+ Absolute Count || id:ebi-a-GCST90001523	Crohn's disease	Inverse variance weighted	14	-0.0652011	0.061414	0.288388	0.936879	0.830629	1.05672	29.8061	0.00502213	0.00497608	0.934444
CD33- HLA DR+ Absolute Count || id:ebi-a-GCST90001523	Crohn's disease	MR Egger	14	-0.0887321	0.287338	0.762764	0.915091	0.521047	1.60713	29.7886	0.00300441	NA	NA
CD33- HLA DR+ Absolute Count || id:ebi-a-GCST90001523	Crohn's disease	Weighted median	14	-0.0609697	0.0686314	0.374345	0.940852	0.822434	1.07632	NA	NA	NA	NA
Granulocytic Myeloid-Derived Suppressor Cells Absolute Count || id:ebi-a-GCST90001524	Crohn's disease	Inverse variance weighted	15	0.0574583	0.0386305	0.136914	1.05914	0.981908	1.14245	12.5157	0.564964	-0.00801692	0.763078
Granulocytic Myeloid-Derived Suppressor Cells Absolute Count || id:ebi-a-GCST90001524	Crohn's disease	MR Egger	15	0.0935056	0.123304	0.461778	1.09802	0.862285	1.39819	12.4209	0.493469	NA	NA
Granulocytic Myeloid-Derived Suppressor Cells Absolute Count || id:ebi-a-GCST90001524	Crohn's disease	Weighted median	15	0.065241	0.0540512	0.227424	1.06742	0.960118	1.18671	NA	NA	NA	NA
CD33dim HLA DR+ CD11b+ Absolute Count || id:ebi-a-GCST90001525	Crohn's disease	Inverse variance weighted	16	-0.0289229	0.0487127	0.552683	0.971491	0.883027	1.06882	26.4096	0.0339315	0.00993433	0.809225
CD33dim HLA DR+ CD11b+ Absolute Count || id:ebi-a-GCST90001525	Crohn's disease	MR Egger	16	-0.0750017	0.193926	0.704753	0.927742	0.634387	1.35675	26.2959	0.0237322	NA	NA
CD33dim HLA DR+ CD11b+ Absolute Count || id:ebi-a-GCST90001525	Crohn's disease	Weighted median	16	-0.0510216	0.0564129	0.365767	0.950258	0.850789	1.06136	NA	NA	NA	NA
CD33dim HLA DR+ CD11b+ %CD33dim HLA DR+ || id:ebi-a-GCST90001526	Crohn's disease	Inverse variance weighted	17	-0.0163629	0.0267864	0.541288	0.98377	0.933453	1.0368	15.6882	0.474928	0.0342769	0.07135
CD33dim HLA DR+ CD11b+ %CD33dim HLA DR+ || id:ebi-a-GCST90001526	Crohn's disease	MR Egger	17	-0.12095	0.0601857	0.0628156	0.886078	0.787483	0.997018	11.9225	0.684884	NA	NA
CD33dim HLA DR+ CD11b+ %CD33dim HLA DR+ || id:ebi-a-GCST90001526	Crohn's disease	Weighted median	17	-0.0681071	0.0366102	0.0628382	0.93416	0.869477	1.00366	NA	NA	NA	NA
CD33dim HLA DR+ CD11b- Absolute Count || id:ebi-a-GCST90001527	Crohn's disease	Inverse variance weighted	16	0.00187493	0.0499906	0.970082	1.00188	0.908367	1.10501	29.5749	0.0135499	0.0198532	0.5356
CD33dim HLA DR+ CD11b- Absolute Count || id:ebi-a-GCST90001527	Crohn's disease	MR Egger	16	-0.0935257	0.158638	0.564884	0.910715	0.667339	1.24285	28.7467	0.0113062	NA	NA
CD33dim HLA DR+ CD11b- Absolute Count || id:ebi-a-GCST90001527	Crohn's disease	Weighted median	16	-0.0139402	0.0557514	0.802555	0.986157	0.884075	1.10002	NA	NA	NA	NA
CD33dim HLA DR+ CD11b- %CD33dim HLA DR+ || id:ebi-a-GCST90001528	Crohn's disease	Inverse variance weighted	15	0.054183	0.0309939	0.0804327	1.05568	0.993456	1.1218	17.2553	0.242826	-0.0176478	0.38328
CD33dim HLA DR+ CD11b- %CD33dim HLA DR+ || id:ebi-a-GCST90001528	Crohn's disease	MR Egger	15	0.107805	0.0671172	0.132233	1.11383	0.976535	1.27043	16.2382	0.236504	NA	NA
CD33dim HLA DR+ CD11b- %CD33dim HLA DR+ || id:ebi-a-GCST90001528	Crohn's disease	Weighted median	15	0.0803172	0.0393501	0.0412413	1.08363	1.0032	1.17051	NA	NA	NA	NA
CD66b++ myeloid cell Absolute Count || id:ebi-a-GCST90001529	Crohn's disease	Inverse variance weighted	14	0.0301898	0.0415526	0.467505	1.03065	0.950038	1.1181	10.7707	0.630023	0.0314619	0.4095
CD66b++ myeloid cell Absolute Count || id:ebi-a-GCST90001529	Crohn's disease	MR Egger	14	-0.117762	0.178037	0.520825	0.888908	0.627059	1.2601	10.0403	0.612425	NA	NA
CD66b++ myeloid cell Absolute Count || id:ebi-a-GCST90001529	Crohn's disease	Weighted median	14	0.000400572	0.0548074	0.994169	1.0004	0.898506	1.11385	NA	NA	NA	NA
Monocytic Myeloid-Derived Suppressor Cells Absolute Count || id:ebi-a-GCST90001530	Crohn's disease	Inverse variance weighted	14	0.0105217	0.0622609	0.865801	1.01058	0.894483	1.14174	59.775	5.76e-08	-0.0175426	0.7043
Monocytic Myeloid-Derived Suppressor Cells Absolute Count || id:ebi-a-GCST90001530	Crohn's disease	MR Egger	14	0.0722311	0.171319	0.680759	1.0749	0.768316	1.50383	59.0318	3.39e-08	NA	NA
Monocytic Myeloid-Derived Suppressor Cells Absolute Count || id:ebi-a-GCST90001530	Crohn's disease	Weighted median	14	0.0564047	0.0487432	0.247198	1.05803	0.961624	1.16409	NA	NA	NA	NA
CD33dim HLA DR- Absolute Count || id:ebi-a-GCST90001531	Crohn's disease	Inverse variance weighted	12	0.0518172	0.0547824	0.344213	1.05318	0.945959	1.17256	25.3804	0.00801635	0.00772299	0.804853
CD33dim HLA DR- Absolute Count || id:ebi-a-GCST90001531	Crohn's disease	MR Egger	12	0.0227522	0.128075	0.862546	1.02301	0.795906	1.31492	25.2181	0.00494715	NA	NA
CD33dim HLA DR- Absolute Count || id:ebi-a-GCST90001531	Crohn's disease	Weighted median	12	0.0630088	0.0490555	0.198989	1.06504	0.967403	1.17252	NA	NA	NA	NA
Basophil Absolute Count || id:ebi-a-GCST90001532	Crohn's disease	Inverse variance weighted	14	0.0357419	0.0550104	0.515866	1.03639	0.930458	1.15438	35.7372	0.000651702	0.0101832	0.738266
Basophil Absolute Count || id:ebi-a-GCST90001532	Crohn's disease	MR Egger	14	-0.00349953	0.12811	0.978656	0.996507	0.77523	1.28094	35.3922	0.000405471	NA	NA
Basophil Absolute Count || id:ebi-a-GCST90001532	Crohn's disease	Weighted median	14	0.044799	0.045628	0.326183	1.04582	0.956349	1.14366	NA	NA	NA	NA
Basophil %CD33dim HLA DR- CD66b- || id:ebi-a-GCST90001533	Crohn's disease	Inverse variance weighted	16	0.0169075	0.0317614	0.594498	1.01705	0.955668	1.08238	15.6756	0.403934	-0.0147878	0.423718
Basophil %CD33dim HLA DR- CD66b- || id:ebi-a-GCST90001533	Crohn's disease	MR Egger	16	0.0720158	0.0741815	0.34812	1.07467	0.929248	1.24286	14.9504	0.381554	NA	NA
Basophil %CD33dim HLA DR- CD66b- || id:ebi-a-GCST90001533	Crohn's disease	Weighted median	16	0.0341818	0.0440471	0.437731	1.03477	0.949186	1.12808	NA	NA	NA	NA
CD45RA- CD4+ T cell Absolute Count || id:ebi-a-GCST90001534	Crohn's disease	Inverse variance weighted	11	0.100532	0.0727641	0.167091	1.10576	0.958787	1.27526	18.5897	0.0457946	0.013864	0.774144
CD45RA- CD4+ T cell Absolute Count || id:ebi-a-GCST90001534	Crohn's disease	MR Egger	11	0.0270997	0.259773	0.919202	1.02747	0.617513	1.70959	18.4108	0.030696	NA	NA
CD45RA- CD4+ T cell Absolute Count || id:ebi-a-GCST90001534	Crohn's disease	Weighted median	11	0.0795837	0.0800436	0.320099	1.08284	0.92561	1.26677	NA	NA	NA	NA
CD45RA- CD4+ T cell %CD4+ T cell || id:ebi-a-GCST90001535	Crohn's disease	Inverse variance weighted	18	0.0369751	0.0472966	0.434349	1.03767	0.945798	1.13846	11.4426	0.832651	0.0184435	0.489734
CD45RA- CD4+ T cell %CD4+ T cell || id:ebi-a-GCST90001535	Crohn's disease	MR Egger	18	-0.0816587	0.174336	0.645818	0.921586	0.654844	1.29698	10.9428	0.813003	NA	NA
CD45RA- CD4+ T cell %CD4+ T cell || id:ebi-a-GCST90001535	Crohn's disease	Weighted median	18	0.00310512	0.0636801	0.96111	1.00311	0.885407	1.13646	NA	NA	NA	NA
CD45RA- CD4+ T cell %T cell || id:ebi-a-GCST90001536	Crohn's disease	Inverse variance weighted	13	0.0153666	0.0578236	0.790433	1.01549	0.906678	1.13735	9.77428	0.635755	0.000277935	0.994918
CD45RA- CD4+ T cell %T cell || id:ebi-a-GCST90001536	Crohn's disease	MR Egger	13	0.0135278	0.288061	0.963386	1.01362	0.576331	1.7827	9.77424	0.550802	NA	NA
CD45RA- CD4+ T cell %T cell || id:ebi-a-GCST90001536	Crohn's disease	Weighted median	13	-0.014397	0.0794549	0.856213	0.985706	0.843556	1.15181	NA	NA	NA	NA
Central Memory CD4+ T cell Absolute Count || id:ebi-a-GCST90001537	Crohn's disease	Inverse variance weighted	17	0.0621536	0.0674977	0.357141	1.06413	0.932262	1.21464	25.0682	0.068633	-0.00497063	0.906298
Central Memory CD4+ T cell Absolute Count || id:ebi-a-GCST90001537	Crohn's disease	MR Egger	17	0.090708	0.248491	0.72018	1.09495	0.672782	1.78202	25.0442	0.0493527	NA	NA
Central Memory CD4+ T cell Absolute Count || id:ebi-a-GCST90001537	Crohn's disease	Weighted median	17	0.0216431	0.0811444	0.789682	1.02188	0.871622	1.19804	NA	NA	NA	NA
Central Memory CD4+ T cell %CD4+ T cell || id:ebi-a-GCST90001538	Crohn's disease	Inverse variance weighted	20	0.0354333	0.0417022	0.395506	1.03607	0.954753	1.12431	19.5376	0.422871	-0.0148095	0.53894
Central Memory CD4+ T cell %CD4+ T cell || id:ebi-a-GCST90001538	Crohn's disease	MR Egger	20	0.115492	0.13466	0.402357	1.12243	0.86205	1.46145	19.1208	0.38442	NA	NA
Central Memory CD4+ T cell %CD4+ T cell || id:ebi-a-GCST90001538	Crohn's disease	Weighted median	20	0.0285113	0.0556327	0.608307	1.02892	0.922628	1.14746	NA	NA	NA	NA
Central Memory CD4+ T cell %T cell || id:ebi-a-GCST90001539	Crohn's disease	Inverse variance weighted	20	-0.017883	0.06527	0.784096	0.982276	0.86432	1.11633	39.6853	0.00359803	-0.0532437	0.198464
Central Memory CD4+ T cell %T cell || id:ebi-a-GCST90001539	Crohn's disease	MR Egger	20	0.328547	0.267235	0.234739	1.38895	0.822643	2.3451	36.1092	0.00683217	NA	NA
Central Memory CD4+ T cell %T cell || id:ebi-a-GCST90001539	Crohn's disease	Weighted median	20	-0.0231493	0.0664223	0.727452	0.977117	0.857841	1.11298	NA	NA	NA	NA
Naive CD4+ T cell Absolute Count || id:ebi-a-GCST90001540	Crohn's disease	Inverse variance weighted	18	0.106553	0.0514498	0.0383579	1.11244	1.00573	1.23047	19.1967	0.317357	0.0194037	0.442861
Naive CD4+ T cell Absolute Count || id:ebi-a-GCST90001540	Crohn's disease	MR Egger	18	0.00208245	0.142601	0.988529	1.00208	0.757739	1.32522	18.4816	0.296461	NA	NA
Naive CD4+ T cell Absolute Count || id:ebi-a-GCST90001540	Crohn's disease	Weighted median	18	0.083324	0.067684	0.218295	1.08689	0.951861	1.24108	NA	NA	NA	NA
Naive CD4+ T cell %CD4+ T cell || id:ebi-a-GCST90001541	Crohn's disease	Inverse variance weighted	23	-0.0534032	0.0442223	0.227199	0.947998	0.86929	1.03383	13.0804	0.930894	-0.0334602	0.125067
Naive CD4+ T cell %CD4+ T cell || id:ebi-a-GCST90001541	Crohn's disease	MR Egger	23	0.159774	0.140572	0.268509	1.17325	0.890701	1.54542	10.528	0.971209	NA	NA
Naive CD4+ T cell %CD4+ T cell || id:ebi-a-GCST90001541	Crohn's disease	Weighted median	23	-0.0288181	0.0586735	0.623313	0.971593	0.866045	1.09	NA	NA	NA	NA
Effector Memory CD4+ T cell Absolute Count || id:ebi-a-GCST90001542	Crohn's disease	Inverse variance weighted	11	0.0276447	0.0647783	0.669555	1.02803	0.905452	1.1672	9.91376	0.448092	-0.0815203	0.100318
Effector Memory CD4+ T cell Absolute Count || id:ebi-a-GCST90001542	Crohn's disease	MR Egger	11	0.380291	0.203188	0.0940552	1.46271	0.982203	2.17829	6.56078	0.682743	NA	NA
Effector Memory CD4+ T cell Absolute Count || id:ebi-a-GCST90001542	Crohn's disease	Weighted median	11	0.0135068	0.0874218	0.877214	1.0136	0.853987	1.20304	NA	NA	NA	NA
Effector Memory CD4+ T cell %CD4+ T cell || id:ebi-a-GCST90001543	Crohn's disease	Inverse variance weighted	17	0.0319156	0.0521065	0.540203	1.03243	0.932195	1.14344	11.6777	0.765854	-0.0170432	0.537471
Effector Memory CD4+ T cell %CD4+ T cell || id:ebi-a-GCST90001543	Crohn's disease	MR Egger	17	0.130067	0.16402	0.440145	1.1389	0.825792	1.57074	11.2794	0.732549	NA	NA
Effector Memory CD4+ T cell %CD4+ T cell || id:ebi-a-GCST90001543	Crohn's disease	Weighted median	17	0.0441863	0.0718682	0.538671	1.04518	0.907851	1.20328	NA	NA	NA	NA
Effector Memory CD4+ T cell %T cell || id:ebi-a-GCST90001544	Crohn's disease	Inverse variance weighted	12	0.0930847	0.0592212	0.115994	1.09755	0.977273	1.23264	4.99307	0.931502	0.0252566	0.446432
Effector Memory CD4+ T cell %T cell || id:ebi-a-GCST90001544	Crohn's disease	MR Egger	12	-0.0461367	0.185376	0.808489	0.954911	0.664	1.37328	4.36493	0.929387	NA	NA
Effector Memory CD4+ T cell %T cell || id:ebi-a-GCST90001544	Crohn's disease	Weighted median	12	0.114794	0.0777497	0.139821	1.12164	0.963103	1.30628	NA	NA	NA	NA
Terminally Differentiated CD4+ T cell Absolute Count || id:ebi-a-GCST90001545	Crohn's disease	Inverse variance weighted	7	-0.0160926	0.0783562	0.837277	0.984036	0.843943	1.14739	8.75946	0.187565	-0.00947836	0.883886
Terminally Differentiated CD4+ T cell Absolute Count || id:ebi-a-GCST90001545	Crohn's disease	MR Egger	7	0.0310495	0.318518	0.926131	1.03154	0.552531	1.92581	8.71829	0.120842	NA	NA
Terminally Differentiated CD4+ T cell Absolute Count || id:ebi-a-GCST90001545	Crohn's disease	Weighted median	7	-0.0826083	0.0908076	0.362977	0.920712	0.770596	1.10007	NA	NA	NA	NA
Terminally Differentiated CD4+ T cell %CD4+ T cell || id:ebi-a-GCST90001546	Crohn's disease	Inverse variance weighted	13	0.0250679	0.0628005	0.68977	1.02538	0.90663	1.15969	15.0511	0.238652	-0.0161391	0.649773
Terminally Differentiated CD4+ T cell %CD4+ T cell || id:ebi-a-GCST90001546	Crohn's disease	MR Egger	13	0.133369	0.240942	0.590973	1.14267	0.71257	1.83238	14.7588	0.193807	NA	NA
Terminally Differentiated CD4+ T cell %CD4+ T cell || id:ebi-a-GCST90001546	Crohn's disease	Weighted median	13	0.0762049	0.0806019	0.34443	1.07918	0.921479	1.26388	NA	NA	NA	NA
Terminally Differentiated CD4+ T cell %T cell || id:ebi-a-GCST90001547	Crohn's disease	Inverse variance weighted	16	0.0554691	0.0631234	0.379542	1.05704	0.934024	1.19625	18.5586	0.234438	-0.0131343	0.700811
Terminally Differentiated CD4+ T cell %T cell || id:ebi-a-GCST90001547	Crohn's disease	MR Egger	16	0.1455	0.23857	0.55171	1.15662	0.724628	1.84614	18.3569	0.191007	NA	NA
Terminally Differentiated CD4+ T cell %T cell || id:ebi-a-GCST90001547	Crohn's disease	Weighted median	16	0.0780303	0.0799911	0.329319	1.08116	0.924269	1.26467	NA	NA	NA	NA
Central Memory CD8+ T cell Absolute Count || id:ebi-a-GCST90001548	Crohn's disease	Inverse variance weighted	20	0.0247885	0.0624123	0.691239	1.0251	0.907066	1.15849	27.8879	0.0856093	0.0768062	0.0191089
Central Memory CD8+ T cell Absolute Count || id:ebi-a-GCST90001548	Crohn's disease	MR Egger	20	-0.389213	0.169917	0.0342732	0.67759	0.485658	0.945373	20.3841	0.311617	NA	NA
Central Memory CD8+ T cell Absolute Count || id:ebi-a-GCST90001548	Crohn's disease	Weighted median	20	0.0183431	0.0778895	0.81382	1.01851	0.87431	1.1865	NA	NA	NA	NA
Central Memory CD8+ T cell %CD8+ T cell || id:ebi-a-GCST90001549	Crohn's disease	Inverse variance weighted	24	-0.0739829	0.0421428	0.0791689	0.928688	0.855061	1.00865	23.8983	0.409456	0.00269916	0.900947
Central Memory CD8+ T cell %CD8+ T cell || id:ebi-a-GCST90001549	Crohn's disease	MR Egger	24	-0.0896369	0.131578	0.502823	0.914263	0.706432	1.18324	23.8811	0.353491	NA	NA
Central Memory CD8+ T cell %CD8+ T cell || id:ebi-a-GCST90001549	Crohn's disease	Weighted median	24	-0.0732529	0.0601209	0.223062	0.929366	0.826058	1.04559	NA	NA	NA	NA
Central Memory CD8+ T cell %T cell || id:ebi-a-GCST90001550	Crohn's disease	Inverse variance weighted	16	-0.0475479	0.072501	0.511937	0.953565	0.827249	1.09917	26.2275	0.0356981	0.0383859	0.319127
Central Memory CD8+ T cell %T cell || id:ebi-a-GCST90001550	Crohn's disease	MR Egger	16	-0.287365	0.243169	0.256989	0.750238	0.46581	1.20834	24.3701	0.0413198	NA	NA
Central Memory CD8+ T cell %T cell || id:ebi-a-GCST90001550	Crohn's disease	Weighted median	16	-0.0326228	0.079554	0.681754	0.967904	0.82816	1.13123	NA	NA	NA	NA
Naive CD8+ T cell Absolute Count || id:ebi-a-GCST90001551	Crohn's disease	Inverse variance weighted	17	0.102223	0.0690115	0.138542	1.10763	0.9675	1.26806	11.7707	0.759605	-0.00424849	0.888384
Naive CD8+ T cell Absolute Count || id:ebi-a-GCST90001551	Crohn's disease	MR Egger	17	0.135164	0.240855	0.582959	1.14473	0.713972	1.83536	11.7504	0.697817	NA	NA
Naive CD8+ T cell Absolute Count || id:ebi-a-GCST90001551	Crohn's disease	Weighted median	17	0.0509144	0.0929738	0.583952	1.05223	0.876942	1.26256	NA	NA	NA	NA
Naive CD8+ T cell %CD8+ T cell || id:ebi-a-GCST90001552	Crohn's disease	Inverse variance weighted	18	-0.0227221	0.0623408	0.715499	0.977534	0.8651	1.10458	5.94929	0.99352	0.00710617	0.78982
Naive CD8+ T cell %CD8+ T cell || id:ebi-a-GCST90001552	Crohn's disease	MR Egger	18	-0.0817193	0.226415	0.722876	0.921531	0.591264	1.43628	5.87582	0.989382	NA	NA
Naive CD8+ T cell %CD8+ T cell || id:ebi-a-GCST90001552	Crohn's disease	Weighted median	18	0.00513122	0.0820488	0.950134	1.00514	0.855829	1.18051	NA	NA	NA	NA
Naive CD8+ T cell %T cell || id:ebi-a-GCST90001553	Crohn's disease	Inverse variance weighted	19	-0.091884	0.081595	0.260124	0.912211	0.777392	1.07041	24.7252	0.132675	0.0402361	0.331235
Naive CD8+ T cell %T cell || id:ebi-a-GCST90001553	Crohn's disease	MR Egger	19	-0.465082	0.381937	0.239974	0.628084	0.297102	1.32779	23.351	0.138168	NA	NA
Naive CD8+ T cell %T cell || id:ebi-a-GCST90001553	Crohn's disease	Weighted median	19	-0.013594	0.0975803	0.889205	0.986498	0.814768	1.19442	NA	NA	NA	NA
Effector Memory CD8+ T cell Absolute Count || id:ebi-a-GCST90001554	Crohn's disease	Inverse variance weighted	16	0.14383	0.0489067	0.00327247	1.15469	1.04914	1.27085	11.1365	0.742857	0.0145023	0.59314
Effector Memory CD8+ T cell Absolute Count || id:ebi-a-GCST90001554	Crohn's disease	MR Egger	16	0.0547932	0.170025	0.752014	1.05632	0.756951	1.47409	10.8376	0.698747	NA	NA
Effector Memory CD8+ T cell Absolute Count || id:ebi-a-GCST90001554	Crohn's disease	Weighted median	16	0.132304	0.0677721	0.0509166	1.14145	0.99947	1.30361	NA	NA	NA	NA
Effector Memory CD8+ T cell %CD8+ T cell || id:ebi-a-GCST90001555	Crohn's disease	Inverse variance weighted	13	0.0347322	0.0565799	0.539307	1.03534	0.926664	1.15677	9.58649	0.652187	0.0126514	0.677153
Effector Memory CD8+ T cell %CD8+ T cell || id:ebi-a-GCST90001555	Crohn's disease	MR Egger	13	-0.0445587	0.193849	0.822416	0.956419	0.654095	1.39848	9.4036	0.584691	NA	NA
Effector Memory CD8+ T cell %CD8+ T cell || id:ebi-a-GCST90001555	Crohn's disease	Weighted median	13	0.0343064	0.0774271	0.657708	1.0349	0.889184	1.2045	NA	NA	NA	NA
Effector Memory CD8+ T cell %T cell || id:ebi-a-GCST90001556	Crohn's disease	Inverse variance weighted	7	0.040165	0.081418	0.621788	1.04098	0.88744	1.22109	10.4926	0.105382	-0.0163395	0.81347
Effector Memory CD8+ T cell %T cell || id:ebi-a-GCST90001556	Crohn's disease	MR Egger	7	0.121541	0.338974	0.734569	1.12924	0.581091	2.19445	10.3644	0.0655455	NA	NA
Effector Memory CD8+ T cell %T cell || id:ebi-a-GCST90001556	Crohn's disease	Weighted median	7	0.0127487	0.0818556	0.876233	1.01283	0.8627	1.18909	NA	NA	NA	NA
Terminally Differentiated CD8+ T cell Absolute Count || id:ebi-a-GCST90001557	Crohn's disease	Inverse variance weighted	12	-0.0175227	0.0720843	0.807938	0.98263	0.85316	1.13175	15.5741	0.157694	-0.045843	0.419999
Terminally Differentiated CD8+ T cell Absolute Count || id:ebi-a-GCST90001557	Crohn's disease	MR Egger	12	0.210396	0.280683	0.47077	1.23417	0.711953	2.13942	14.5453	0.149539	NA	NA
Terminally Differentiated CD8+ T cell Absolute Count || id:ebi-a-GCST90001557	Crohn's disease	Weighted median	12	-0.124736	0.0880232	0.156458	0.88273	0.742849	1.04895	NA	NA	NA	NA
Terminally Differentiated CD8+ T cell %CD8+ T cell || id:ebi-a-GCST90001558	Crohn's disease	Inverse variance weighted	14	-0.0312714	0.0559838	0.576449	0.969213	0.86849	1.08162	14.6326	0.33085	-0.0861257	0.0500796
Terminally Differentiated CD8+ T cell %CD8+ T cell || id:ebi-a-GCST90001558	Crohn's disease	MR Egger	14	0.405761	0.207487	0.0742	1.50044	0.999087	2.25339	9.8892	0.62568	NA	NA
Terminally Differentiated CD8+ T cell %CD8+ T cell || id:ebi-a-GCST90001558	Crohn's disease	Weighted median	14	-0.0219215	0.0773128	0.77676	0.978317	0.840755	1.13839	NA	NA	NA	NA
Terminally Differentiated CD8+ T cell %T cell || id:ebi-a-GCST90001559	Crohn's disease	Inverse variance weighted	13	0.102511	0.0605905	0.0906706	1.10795	0.983885	1.24766	15.0273	0.239945	0.0313254	0.422538
Terminally Differentiated CD8+ T cell %T cell || id:ebi-a-GCST90001559	Crohn's disease	MR Egger	13	-0.0772627	0.224362	0.737064	0.925647	0.5963	1.4369	14.1356	0.225583	NA	NA
Terminally Differentiated CD8+ T cell %T cell || id:ebi-a-GCST90001559	Crohn's disease	Weighted median	13	0.109353	0.0759837	0.150105	1.11556	0.961197	1.2947	NA	NA	NA	NA
CD45RA+ CD8+ T cell Absolute Count || id:ebi-a-GCST90001560	Crohn's disease	Inverse variance weighted	14	-0.00684559	0.0648828	0.915974	0.993178	0.874576	1.12786	14.3676	0.348472	0.0227455	0.588969
CD45RA+ CD8+ T cell Absolute Count || id:ebi-a-GCST90001560	Crohn's disease	MR Egger	14	-0.159638	0.283174	0.583309	0.852452	0.489359	1.48495	14.0078	0.300208	NA	NA
CD45RA+ CD8+ T cell Absolute Count || id:ebi-a-GCST90001560	Crohn's disease	Weighted median	14	-0.012389	0.0901456	0.890688	0.987687	0.827725	1.17856	NA	NA	NA	NA
CD45RA+ CD8+ T cell %CD8+ T cell || id:ebi-a-GCST90001561	Crohn's disease	Inverse variance weighted	8	-0.0185114	0.0670873	0.782602	0.981659	0.860706	1.11961	7.68149	0.361516	-0.0177155	0.639417
CD45RA+ CD8+ T cell %CD8+ T cell || id:ebi-a-GCST90001561	Crohn's disease	MR Egger	8	0.0843787	0.22039	0.71502	1.08804	0.706391	1.67589	7.38224	0.286939	NA	NA
CD45RA+ CD8+ T cell %CD8+ T cell || id:ebi-a-GCST90001561	Crohn's disease	Weighted median	8	0.0280235	0.0799717	0.726025	1.02842	0.879219	1.20294	NA	NA	NA	NA
CD45RA+ CD8+ T cell %T cell || id:ebi-a-GCST90001562	Crohn's disease	Inverse variance weighted	13	0.0352159	0.0800862	0.660136	1.03584	0.885367	1.21189	16.9867	0.150099	-0.0409575	0.312722
CD45RA+ CD8+ T cell %T cell || id:ebi-a-GCST90001562	Crohn's disease	MR Egger	13	0.308017	0.269872	0.277965	1.36072	0.801771	2.30935	15.4177	0.164163	NA	NA
CD45RA+ CD8+ T cell %T cell || id:ebi-a-GCST90001562	Crohn's disease	Weighted median	13	0.00249604	0.0974851	0.979573	1.0025	0.828139	1.21357	NA	NA	NA	NA
Central Memory CD4-CD8- T cell Absolute Count || id:ebi-a-GCST90001563	Crohn's disease	Inverse variance weighted	2	-0.136476	0.204255	0.504029	0.872427	0.584606	1.30195	0.0139516	0.905975	NA	NA
Central Memory CD4-CD8- T cell %CD4-CD8- T cell || id:ebi-a-GCST90001564	Crohn's disease	Inverse variance weighted	11	-0.128613	0.102472	0.209439	0.879314	0.719313	1.0749	20.861	0.0220837	-0.0759122	0.152387
Central Memory CD4-CD8- T cell %CD4-CD8- T cell || id:ebi-a-GCST90001564	Crohn's disease	MR Egger	11	0.369807	0.332877	0.29539	1.44745	0.753797	2.77943	16.4054	0.0588828	NA	NA
Central Memory CD4-CD8- T cell %CD4-CD8- T cell || id:ebi-a-GCST90001564	Crohn's disease	Weighted median	11	-0.0359312	0.0944968	0.70377	0.964707	0.801601	1.161	NA	NA	NA	NA
Central Memory CD4-CD8- T cell %T cell || id:ebi-a-GCST90001565	Crohn's disease	Inverse variance weighted	9	-0.0219405	0.0712354	0.758082	0.978298	0.850814	1.12489	6.17937	0.627148	-0.0554994	0.152459
Central Memory CD4-CD8- T cell %T cell || id:ebi-a-GCST90001565	Crohn's disease	MR Egger	9	0.331037	0.231132	0.195177	1.39241	0.885165	2.19034	3.60233	0.824271	NA	NA
Central Memory CD4-CD8- T cell %T cell || id:ebi-a-GCST90001565	Crohn's disease	Weighted median	9	-0.0212889	0.0988146	0.829422	0.978936	0.806569	1.18814	NA	NA	NA	NA
Naive CD4-CD8- T cell Absolute Count || id:ebi-a-GCST90001566	Crohn's disease	Inverse variance weighted	12	-0.0267973	0.0984302	0.785432	0.973559	0.802743	1.18072	19.7021	0.0495976	0.00427945	0.93232
Naive CD4-CD8- T cell Absolute Count || id:ebi-a-GCST90001566	Crohn's disease	MR Egger	12	-0.0570204	0.362058	0.877993	0.944575	0.464565	1.92055	19.6872	0.0323544	NA	NA
Naive CD4-CD8- T cell Absolute Count || id:ebi-a-GCST90001566	Crohn's disease	Weighted median	12	0.127905	0.112975	0.25757	1.13645	0.910714	1.41813	NA	NA	NA	NA
Naive CD4-CD8- T cell %CD4-CD8- T cell || id:ebi-a-GCST90001567	Crohn's disease	Inverse variance weighted	13	-0.0168661	0.11124	0.879488	0.983275	0.790652	1.22283	35.1317	0.000446219	0.118888	0.244685
Naive CD4-CD8- T cell %CD4-CD8- T cell || id:ebi-a-GCST90001567	Crohn's disease	MR Egger	13	-0.977055	0.788785	0.241244	0.376418	0.0802126	1.76644	30.8896	0.00114689	NA	NA
Naive CD4-CD8- T cell %CD4-CD8- T cell || id:ebi-a-GCST90001567	Crohn's disease	Weighted median	13	0.0540569	0.100289	0.589879	1.05554	0.867179	1.28483	NA	NA	NA	NA
Naive CD4-CD8- T cell %T cell || id:ebi-a-GCST90001568	Crohn's disease	Inverse variance weighted	17	0.0172821	0.0717312	0.809611	1.01743	0.883989	1.17102	23.3113	0.105663	-0.0248568	0.499975
Naive CD4-CD8- T cell %T cell || id:ebi-a-GCST90001568	Crohn's disease	MR Egger	17	0.184814	0.2531	0.476518	1.20299	0.732522	1.97563	22.5917	0.0932027	NA	NA
Naive CD4-CD8- T cell %T cell || id:ebi-a-GCST90001568	Crohn's disease	Weighted median	17	0.0672316	0.0867469	0.438321	1.06954	0.902314	1.26777	NA	NA	NA	NA
Effector Memory CD4-CD8- T cell Absolute Count || id:ebi-a-GCST90001569	Crohn's disease	Inverse variance weighted	15	-0.0214775	0.0617963	0.728176	0.978752	0.867102	1.10478	17.2065	0.24534	0.0262827	0.477639
Effector Memory CD4-CD8- T cell Absolute Count || id:ebi-a-GCST90001569	Crohn's disease	MR Egger	15	-0.187152	0.235138	0.440369	0.829318	0.523079	1.31485	16.5268	0.221846	NA	NA
Effector Memory CD4-CD8- T cell Absolute Count || id:ebi-a-GCST90001569	Crohn's disease	Weighted median	15	-0.00307142	0.0766741	0.968047	0.996933	0.857827	1.1586	NA	NA	NA	NA
Effector Memory CD4-CD8- T cell %CD4-CD8- T cell || id:ebi-a-GCST90001570	Crohn's disease	Inverse variance weighted	16	0.0406572	0.0510182	0.4255	1.0415	0.942388	1.15102	17.0954	0.313194	0.0269661	0.488431
Effector Memory CD4-CD8- T cell %CD4-CD8- T cell || id:ebi-a-GCST90001570	Crohn's disease	MR Egger	16	-0.133543	0.250255	0.601968	0.87499	0.535774	1.42897	16.4987	0.283876	NA	NA
Effector Memory CD4-CD8- T cell %CD4-CD8- T cell || id:ebi-a-GCST90001570	Crohn's disease	Weighted median	16	0.120946	0.0686716	0.0782011	1.12856	0.986442	1.29116	NA	NA	NA	NA
Effector Memory CD4-CD8- T cell %T cell || id:ebi-a-GCST90001571	Crohn's disease	Inverse variance weighted	20	0.0036075	0.0483764	0.940556	1.00361	0.912826	1.10343	19.009	0.456258	0.0101153	0.709758
Effector Memory CD4-CD8- T cell %T cell || id:ebi-a-GCST90001571	Crohn's disease	MR Egger	20	-0.0525246	0.156485	0.741013	0.948831	0.698211	1.28941	18.8592	0.400541	NA	NA
Effector Memory CD4-CD8- T cell %T cell || id:ebi-a-GCST90001571	Crohn's disease	Weighted median	20	0.0211817	0.0707219	0.764553	1.02141	0.8892	1.17327	NA	NA	NA	NA
Terminally Differentiated CD4-CD8- T cell Absolute Count || id:ebi-a-GCST90001572	Crohn's disease	Inverse variance weighted	14	-0.020805	0.0506853	0.681458	0.97941	0.886789	1.0817	12.9103	0.454765	0.0134894	0.612001
Terminally Differentiated CD4-CD8- T cell Absolute Count || id:ebi-a-GCST90001572	Crohn's disease	MR Egger	14	-0.101032	0.16259	0.545966	0.903904	0.657238	1.24315	12.625	0.396879	NA	NA
Terminally Differentiated CD4-CD8- T cell Absolute Count || id:ebi-a-GCST90001572	Crohn's disease	Weighted median	14	-0.000239905	0.0715412	0.997324	0.99976	0.868958	1.15025	NA	NA	NA	NA
Terminally Differentiated CD4-CD8- T cell %CD4-CD8- T cell || id:ebi-a-GCST90001573	Crohn's disease	Inverse variance weighted	18	0.047774	0.0528592	0.366102	1.04893	0.9457	1.16344	21.6434	0.198825	-0.0251406	0.448351
Terminally Differentiated CD4-CD8- T cell %CD4-CD8- T cell || id:ebi-a-GCST90001573	Crohn's disease	MR Egger	18	0.2061	0.210605	0.342339	1.22888	0.813275	1.85686	20.8559	0.184116	NA	NA
Terminally Differentiated CD4-CD8- T cell %CD4-CD8- T cell || id:ebi-a-GCST90001573	Crohn's disease	Weighted median	18	0.0646683	0.0709322	0.361931	1.06681	0.928339	1.22592	NA	NA	NA	NA
Terminally Differentiated CD4-CD8- T cell %T cell || id:ebi-a-GCST90001574	Crohn's disease	Inverse variance weighted	12	-0.125909	0.0540158	0.0197549	0.881695	0.79312	0.980161	5.86602	0.882153	0.0187729	0.569518
Terminally Differentiated CD4-CD8- T cell %T cell || id:ebi-a-GCST90001574	Crohn's disease	MR Egger	12	-0.236445	0.195567	0.254462	0.789429	0.538076	1.1582	5.52017	0.853838	NA	NA
Terminally Differentiated CD4-CD8- T cell %T cell || id:ebi-a-GCST90001574	Crohn's disease	Weighted median	12	-0.107685	0.0702408	0.125256	0.897911	0.782426	1.03044	NA	NA	NA	NA
Naive CD4+ T cell %T cell || id:ebi-a-GCST90001575	Crohn's disease	Inverse variance weighted	25	-0.000614651	0.041801	0.988268	0.999386	0.92077	1.08471	13.6726	0.953704	-0.00702699	0.743664
Naive CD4+ T cell %T cell || id:ebi-a-GCST90001575	Crohn's disease	MR Egger	25	0.04393	0.14093	0.758066	1.04491	0.792713	1.37734	13.563	0.938706	NA	NA
Naive CD4+ T cell %T cell || id:ebi-a-GCST90001575	Crohn's disease	Weighted median	25	0.00844214	0.0571774	0.88262	1.00848	0.901563	1.12807	NA	NA	NA	NA
Transitional B cell %B cell || id:ebi-a-GCST90001576	Crohn's disease	Inverse variance weighted	12	-0.119816	0.0881152	0.173903	0.887083	0.746379	1.05431	20.5886	0.0378921	-0.0412876	0.405423
Transitional B cell %B cell || id:ebi-a-GCST90001576	Crohn's disease	MR Egger	12	0.14316	0.315597	0.65979	1.15391	0.62163	2.14198	19.1442	0.0384686	NA	NA
Transitional B cell %B cell || id:ebi-a-GCST90001576	Crohn's disease	Weighted median	12	-0.137382	0.0956979	0.151122	0.871637	0.722564	1.05147	NA	NA	NA	NA
Transitional B cell Absolute Count || id:ebi-a-GCST90001577	Crohn's disease	Inverse variance weighted	24	-0.0103188	0.0554656	0.852414	0.989734	0.88778	1.1034	34.6634	0.0561545	0.00421665	0.874805
Transitional B cell Absolute Count || id:ebi-a-GCST90001577	Crohn's disease	MR Egger	24	-0.0380889	0.183201	0.837214	0.962627	0.672224	1.37849	34.6234	0.0423995	NA	NA
Transitional B cell Absolute Count || id:ebi-a-GCST90001577	Crohn's disease	Weighted median	24	-0.0607453	0.0710791	0.392764	0.941063	0.818681	1.08174	NA	NA	NA	NA
Transitional B cell %lymphocyte || id:ebi-a-GCST90001578	Crohn's disease	Inverse variance weighted	21	-0.0823487	0.0571186	0.149383	0.920951	0.82341	1.03005	25.8867	0.169586	-0.00726619	0.81213
Transitional B cell %lymphocyte || id:ebi-a-GCST90001578	Crohn's disease	MR Egger	21	-0.0323396	0.215592	0.882343	0.968178	0.634512	1.47731	25.8078	0.135634	NA	NA
Transitional B cell %lymphocyte || id:ebi-a-GCST90001578	Crohn's disease	Weighted median	21	-0.0923707	0.0739622	0.211705	0.911767	0.788726	1.054	NA	NA	NA	NA
CD14- CD16+ monocyte Absolute Count || id:ebi-a-GCST90001579	Crohn's disease	Inverse variance weighted	14	0.0569749	0.0533433	0.285485	1.05863	0.953536	1.17531	7.01291	0.901485	-0.0256009	0.344601
CD14- CD16+ monocyte Absolute Count || id:ebi-a-GCST90001579	Crohn's disease	MR Egger	14	0.17223	0.128718	0.205687	1.18795	0.923063	1.52885	6.04491	0.913801	NA	NA
CD14- CD16+ monocyte Absolute Count || id:ebi-a-GCST90001579	Crohn's disease	Weighted median	14	0.0999659	0.0707588	0.157723	1.10513	0.962019	1.26954	NA	NA	NA	NA
CD14+ CD16+ monocyte Absolute Count || id:ebi-a-GCST90001580	Crohn's disease	Inverse variance weighted	14	0.149266	0.058335	0.0105041	1.16098	1.03555	1.30161	22.2232	0.0519992	0.0230784	0.315444
CD14+ CD16+ monocyte Absolute Count || id:ebi-a-GCST90001580	Crohn's disease	MR Egger	14	0.0621101	0.101482	0.551938	1.06408	0.872149	1.29825	20.3609	0.0605601	NA	NA
CD14+ CD16+ monocyte Absolute Count || id:ebi-a-GCST90001580	Crohn's disease	Weighted median	14	0.115974	0.0592623	0.0503516	1.12297	0.99982	1.26128	NA	NA	NA	NA
CD14- CD16- Absolute Count || id:ebi-a-GCST90001581	Crohn's disease	Inverse variance weighted	17	0.0838477	0.0528728	0.112776	1.08746	0.980411	1.2062	20.5521	0.196377	-0.0123889	0.683256
CD14- CD16- Absolute Count || id:ebi-a-GCST90001581	Crohn's disease	MR Egger	17	0.149506	0.166887	0.384484	1.16126	0.837284	1.61059	20.3176	0.160084	NA	NA
CD14- CD16- Absolute Count || id:ebi-a-GCST90001581	Crohn's disease	Weighted median	17	0.101401	0.0665644	0.12767	1.10672	0.971353	1.26095	NA	NA	NA	NA
CD14+ CD16- monocyte Absolute Count || id:ebi-a-GCST90001582	Crohn's disease	Inverse variance weighted	20	0.0594463	0.0739494	0.421468	1.06125	0.918058	1.22677	44.2974	0.000858851	0.0153499	0.721915
CD14+ CD16- monocyte Absolute Count || id:ebi-a-GCST90001582	Crohn's disease	MR Egger	20	-0.0385887	0.281538	0.892502	0.962146	0.554104	1.67067	43.978	0.000581086	NA	NA
CD14+ CD16- monocyte Absolute Count || id:ebi-a-GCST90001582	Crohn's disease	Weighted median	20	0.0359595	0.07833	0.646179	1.03661	0.889081	1.20863	NA	NA	NA	NA
Monocyte Absolute Count || id:ebi-a-GCST90001583	Crohn's disease	Inverse variance weighted	18	-0.0207111	0.0876717	0.813251	0.979502	0.824855	1.16314	48.4174	7.41e-05	-0.0193578	0.76813
Monocyte Absolute Count || id:ebi-a-GCST90001583	Crohn's disease	MR Egger	18	0.111432	0.449774	0.807479	1.11788	0.462955	2.69929	48.1467	4.5e-05	NA	NA
Monocyte Absolute Count || id:ebi-a-GCST90001583	Crohn's disease	Weighted median	18	-0.0605734	0.0870653	0.486602	0.941225	0.793564	1.11636	NA	NA	NA	NA
CD14- CD16+ monocyte %monocyte || id:ebi-a-GCST90001584	Crohn's disease	Inverse variance weighted	14	0.0756893	0.0532399	0.155123	1.07863	0.971746	1.19726	12.0288	0.52528	0.00863885	0.691516
CD14- CD16+ monocyte %monocyte || id:ebi-a-GCST90001584	Crohn's disease	MR Egger	14	0.0236042	0.138745	0.867745	1.02388	0.780097	1.34386	11.8636	0.456697	NA	NA
CD14- CD16+ monocyte %monocyte || id:ebi-a-GCST90001584	Crohn's disease	Weighted median	14	0.0285213	0.0743187	0.701148	1.02893	0.889458	1.19028	NA	NA	NA	NA
CD14+ CD16+ monocyte %monocyte || id:ebi-a-GCST90001585	Crohn's disease	Inverse variance weighted	18	0.0858435	0.0533483	0.107591	1.08964	0.981455	1.20974	31.7687	0.0160748	0.000969087	0.967765
CD14+ CD16+ monocyte %monocyte || id:ebi-a-GCST90001585	Crohn's disease	MR Egger	18	0.0824609	0.0990677	0.417452	1.08596	0.894302	1.31868	31.7654	0.0107267	NA	NA
CD14+ CD16+ monocyte %monocyte || id:ebi-a-GCST90001585	Crohn's disease	Weighted median	18	0.101967	0.0524565	0.0519144	1.10735	0.999153	1.22726	NA	NA	NA	NA
CD14+ CD16- monocyte %monocyte || id:ebi-a-GCST90001586	Crohn's disease	Inverse variance weighted	17	-0.0768832	0.0494144	0.119735	0.925998	0.840519	1.02017	9.56482	0.888346	-0.00043815	0.982604
CD14+ CD16- monocyte %monocyte || id:ebi-a-GCST90001586	Crohn's disease	MR Egger	17	-0.0746052	0.114014	0.522794	0.92811	0.742247	1.16051	9.56433	0.846214	NA	NA
CD14+ CD16- monocyte %monocyte || id:ebi-a-GCST90001586	Crohn's disease	Weighted median	17	-0.10129	0.0720898	0.160007	0.903671	0.784597	1.04082	NA	NA	NA	NA
CD16+ monocyte %monocyte || id:ebi-a-GCST90001587	Crohn's disease	Inverse variance weighted	17	0.0745058	0.0534286	0.163169	1.07735	0.970238	1.19629	20.6039	0.194242	0.0053408	0.810603
CD16+ monocyte %monocyte || id:ebi-a-GCST90001587	Crohn's disease	MR Egger	17	0.0448468	0.133486	0.741551	1.04587	0.805102	1.35863	20.5225	0.15279	NA	NA
CD16+ monocyte %monocyte || id:ebi-a-GCST90001587	Crohn's disease	Weighted median	17	0.0406027	0.0660841	0.538944	1.04144	0.914917	1.18546	NA	NA	NA	NA
T/B cell || id:ebi-a-GCST90001588	Crohn's disease	Inverse variance weighted	22	-0.0113517	0.0545466	0.835142	0.988712	0.888462	1.10027	36.3991	0.0197119	0.0442881	0.185173
T/B cell || id:ebi-a-GCST90001588	Crohn's disease	MR Egger	22	-0.305727	0.221071	0.18193	0.736587	0.477579	1.13607	33.2668	0.0315342	NA	NA
T/B cell || id:ebi-a-GCST90001588	Crohn's disease	Weighted median	22	0.0355969	0.0639973	0.578057	1.03624	0.914079	1.17472	NA	NA	NA	NA
CD4+/CD8+ T cell || id:ebi-a-GCST90001589	Crohn's disease	Inverse variance weighted	10	0.00663259	0.0629403	0.916075	1.00665	0.889825	1.13882	2.93628	0.966768	0.000997089	0.976598
CD4+/CD8+ T cell || id:ebi-a-GCST90001589	Crohn's disease	MR Egger	10	0.000658674	0.207187	0.997541	1.00066	0.666691	1.50192	2.93537	0.938348	NA	NA
CD4+/CD8+ T cell || id:ebi-a-GCST90001589	Crohn's disease	Weighted median	10	0.0168979	0.079821	0.832343	1.01704	0.869748	1.18928	NA	NA	NA	NA
CD4+ T cell Absolute Count || id:ebi-a-GCST90001590	Crohn's disease	Inverse variance weighted	18	0.125645	0.0613177	0.0404538	1.13388	1.00548	1.27868	27.1091	0.0564876	-0.0102269	0.780987
CD4+ T cell Absolute Count || id:ebi-a-GCST90001590	Crohn's disease	MR Egger	18	0.190205	0.236866	0.433738	1.2095	0.760292	1.92411	26.9743	0.0417701	NA	NA
CD4+ T cell Absolute Count || id:ebi-a-GCST90001590	Crohn's disease	Weighted median	18	0.105628	0.0758751	0.163882	1.11141	0.957828	1.28961	NA	NA	NA	NA
CD4+ T cell %T cell || id:ebi-a-GCST90001591	Crohn's disease	Inverse variance weighted	14	0.0241809	0.0597677	0.685785	1.02448	0.911227	1.1518	8.38887	0.817376	0.00327962	0.920199
CD4+ T cell %T cell || id:ebi-a-GCST90001591	Crohn's disease	MR Egger	14	0.00421117	0.204131	0.98388	1.00422	0.673084	1.49826	8.37841	0.754904	NA	NA
CD4+ T cell %T cell || id:ebi-a-GCST90001591	Crohn's disease	Weighted median	14	0.00835102	0.0820844	0.918965	1.00839	0.858529	1.1844	NA	NA	NA	NA
CD8+ T cell Absolute Count || id:ebi-a-GCST90001592	Crohn's disease	Inverse variance weighted	14	0.0762357	0.0597654	0.202104	1.07922	0.959921	1.21334	13.6829	0.396548	0.0380084	0.234509
CD8+ T cell Absolute Count || id:ebi-a-GCST90001592	Crohn's disease	MR Egger	14	-0.186372	0.217796	0.408915	0.829965	0.541587	1.27189	12.1026	0.437474	NA	NA
CD8+ T cell Absolute Count || id:ebi-a-GCST90001592	Crohn's disease	Weighted median	14	0.0632234	0.0844518	0.454078	1.06526	0.902757	1.25703	NA	NA	NA	NA
CD8+ T cell %T cell || id:ebi-a-GCST90001593	Crohn's disease	Inverse variance weighted	15	-0.0316739	0.0494362	0.521716	0.968822	0.879353	1.0674	10.7058	0.708977	-0.0226769	0.463689
CD8+ T cell %T cell || id:ebi-a-GCST90001593	Crohn's disease	MR Egger	15	0.0910675	0.169915	0.601037	1.09534	0.785083	1.52822	10.1357	0.6828	NA	NA
CD8+ T cell %T cell || id:ebi-a-GCST90001593	Crohn's disease	Weighted median	15	-0.0262314	0.0665296	0.693373	0.97411	0.855021	1.10979	NA	NA	NA	NA
CD4+CD8+ T cell Absolute Count || id:ebi-a-GCST90001594	Crohn's disease	Inverse variance weighted	12	-0.0342765	0.0657422	0.602104	0.966304	0.84948	1.0992	17.3623	0.097607	-0.0168657	0.624794
CD4+CD8+ T cell Absolute Count || id:ebi-a-GCST90001594	Crohn's disease	MR Egger	12	0.0607277	0.200222	0.767876	1.06261	0.717698	1.57328	16.9312	0.0758998	NA	NA
CD4+CD8+ T cell Absolute Count || id:ebi-a-GCST90001594	Crohn's disease	Weighted median	12	-0.0126808	0.0801169	0.874237	0.987399	0.84391	1.15529	NA	NA	NA	NA
CD4+CD8+ T cell %T cell || id:ebi-a-GCST90001595	Crohn's disease	Inverse variance weighted	6	-0.167046	0.0958258	0.081294	0.846161	0.701268	1.02099	1.52018	0.910729	0.0654479	0.39136
CD4+CD8+ T cell %T cell || id:ebi-a-GCST90001595	Crohn's disease	MR Egger	6	-0.59152	0.452365	0.261095	0.553485	0.228058	1.34328	0.598327	0.963249	NA	NA
CD4+CD8+ T cell %T cell || id:ebi-a-GCST90001595	Crohn's disease	Weighted median	6	-0.151231	0.123262	0.219856	0.859649	0.675147	1.09457	NA	NA	NA	NA
CD8dim T cell Absolute Count || id:ebi-a-GCST90001596	Crohn's disease	Inverse variance weighted	18	0.0392427	0.0550446	0.475892	1.04002	0.933658	1.1585	13.4947	0.702491	-0.00558021	0.834404
CD8dim T cell Absolute Count || id:ebi-a-GCST90001596	Crohn's disease	MR Egger	18	0.0676358	0.144511	0.646074	1.06998	0.806053	1.42031	13.4495	0.639648	NA	NA
CD8dim T cell Absolute Count || id:ebi-a-GCST90001596	Crohn's disease	Weighted median	18	0.0804478	0.0771874	0.2973	1.08377	0.931611	1.26079	NA	NA	NA	NA
CD8dim T cell %T cell || id:ebi-a-GCST90001597	Crohn's disease	Inverse variance weighted	14	-0.0330175	0.0644026	0.60818	0.967522	0.852786	1.09769	14.31	0.352379	-0.0250363	0.372358
CD8dim T cell %T cell || id:ebi-a-GCST90001597	Crohn's disease	MR Egger	14	0.0737929	0.132207	0.586996	1.07658	0.830828	1.39503	13.3544	0.343818	NA	NA
CD8dim T cell %T cell || id:ebi-a-GCST90001597	Crohn's disease	Weighted median	14	0.0575693	0.0901038	0.522874	1.05926	0.887777	1.26386	NA	NA	NA	NA
CD4-CD8- T cell Absolute Count || id:ebi-a-GCST90001598	Crohn's disease	Inverse variance weighted	18	-0.0091535	0.0535996	0.8644	0.990888	0.892072	1.10065	19.6417	0.292964	-0.0253134	0.354574
CD4-CD8- T cell Absolute Count || id:ebi-a-GCST90001598	Crohn's disease	MR Egger	18	0.155627	0.181	0.402587	1.16839	0.819442	1.66594	18.5859	0.290723	NA	NA
CD4-CD8- T cell Absolute Count || id:ebi-a-GCST90001598	Crohn's disease	Weighted median	18	0.00296202	0.0748854	0.968449	1.00297	0.866049	1.16153	NA	NA	NA	NA
CD4-CD8- T cell %T cell || id:ebi-a-GCST90001599	Crohn's disease	Inverse variance weighted	13	-0.0194368	0.0591596	0.742496	0.980751	0.873376	1.10133	14.2707	0.283755	-0.0260721	0.32133
CD4-CD8- T cell %T cell || id:ebi-a-GCST90001599	Crohn's disease	MR Egger	13	0.137278	0.162018	0.414881	1.14715	0.835039	1.57591	12.9965	0.293553	NA	NA
CD4-CD8- T cell %T cell || id:ebi-a-GCST90001599	Crohn's disease	Weighted median	13	-0.0180605	0.0762201	0.812694	0.982102	0.845817	1.14035	NA	NA	NA	NA
Leukocyte Absolute Count || id:ebi-a-GCST90001600	Crohn's disease	Inverse variance weighted	4	-0.0204144	0.145885	0.888712	0.979793	0.73613	1.30411	5.61753	0.131776	0.131783	0.752202
Leukocyte Absolute Count || id:ebi-a-GCST90001600	Crohn's disease	MR Egger	4	-0.473133	1.26348	0.744033	0.623047	0.0523628	7.41343	5.27259	0.0716263	NA	NA
Leukocyte Absolute Count || id:ebi-a-GCST90001600	Crohn's disease	Weighted median	4	0.0633275	0.143417	0.658806	1.06538	0.804311	1.41118	NA	NA	NA	NA
Lymphocyte Absolute Count || id:ebi-a-GCST90001601	Crohn's disease	Inverse variance weighted	12	0.0674957	0.0793028	0.394707	1.06983	0.915818	1.24973	18.2113	0.0768058	-0.0214011	0.712186
Lymphocyte Absolute Count || id:ebi-a-GCST90001601	Crohn's disease	MR Egger	12	0.207926	0.379056	0.595358	1.23112	0.585655	2.58798	17.9526	0.0557684	NA	NA
Lymphocyte Absolute Count || id:ebi-a-GCST90001601	Crohn's disease	Weighted median	12	-0.0622826	0.0932343	0.504119	0.939617	0.782687	1.12801	NA	NA	NA	NA
Lymphocyte %leukocyte || id:ebi-a-GCST90001602	Crohn's disease	Inverse variance weighted	15	-0.0893796	0.0574194	0.119563	0.914498	0.817159	1.02343	14.2033	0.43468	-0.040409	0.357849
Lymphocyte %leukocyte || id:ebi-a-GCST90001602	Crohn's disease	MR Egger	15	0.167815	0.275887	0.553486	1.18272	0.688718	2.03105	13.2753	0.426777	NA	NA
Lymphocyte %leukocyte || id:ebi-a-GCST90001602	Crohn's disease	Weighted median	15	-0.0838504	0.0809776	0.300447	0.919569	0.784612	1.07774	NA	NA	NA	NA
T cell Absolute Count || id:ebi-a-GCST90001603	Crohn's disease	Inverse variance weighted	12	0.00154553	0.0927877	0.986711	1.00155	0.835004	1.20131	23.3271	0.0158883	-0.0252802	0.703812
T cell Absolute Count || id:ebi-a-GCST90001603	Crohn's disease	MR Egger	12	0.179649	0.465339	0.707538	1.1968	0.480747	2.97937	22.9754	0.0108377	NA	NA
T cell Absolute Count || id:ebi-a-GCST90001603	Crohn's disease	Weighted median	12	-0.0480048	0.0942994	0.610704	0.953129	0.792287	1.14662	NA	NA	NA	NA
T cell %lymphocyte || id:ebi-a-GCST90001604	Crohn's disease	Inverse variance weighted	15	0.108899	0.0535903	0.0421474	1.11505	1.00387	1.23854	19.7039	0.139757	0.0118857	0.738495
T cell %lymphocyte || id:ebi-a-GCST90001604	Crohn's disease	MR Egger	15	0.0500134	0.181306	0.786999	1.05129	0.736868	1.49986	19.5291	0.107589	NA	NA
T cell %lymphocyte || id:ebi-a-GCST90001604	Crohn's disease	Weighted median	15	0.148061	0.0691431	0.0322444	1.15958	1.01262	1.32788	NA	NA	NA	NA
T cell %leukocyte || id:ebi-a-GCST90001605	Crohn's disease	Inverse variance weighted	13	0.0282805	0.0827733	0.732605	1.02868	0.874629	1.20987	24.6223	0.0167177	0.035178	0.450639
T cell %leukocyte || id:ebi-a-GCST90001605	Crohn's disease	MR Egger	13	-0.185539	0.286034	0.529866	0.830656	0.474181	1.45512	23.3251	0.0158989	NA	NA
T cell %leukocyte || id:ebi-a-GCST90001605	Crohn's disease	Weighted median	13	-0.0511747	0.0877204	0.559635	0.950113	0.800029	1.12835	NA	NA	NA	NA
CD4+ T cell %leukocyte || id:ebi-a-GCST90001606	Crohn's disease	Inverse variance weighted	9	0.050345	0.0684147	0.461804	1.05163	0.919663	1.20254	5.73748	0.676611	-0.0549589	0.212681
CD4+ T cell %leukocyte || id:ebi-a-GCST90001606	Crohn's disease	MR Egger	9	0.403946	0.266816	0.173807	1.49772	0.887797	2.52667	3.85755	0.796031	NA	NA
CD4+ T cell %leukocyte || id:ebi-a-GCST90001606	Crohn's disease	Weighted median	9	0.088801	0.0926304	0.33773	1.09286	0.911417	1.31043	NA	NA	NA	NA
CD8+ T cell %leukocyte || id:ebi-a-GCST90001607	Crohn's disease	Inverse variance weighted	12	-0.00786338	0.0560078	0.888346	0.992167	0.889017	1.10729	5.04156	0.929137	0.0113116	0.723618
CD8+ T cell %leukocyte || id:ebi-a-GCST90001607	Crohn's disease	MR Egger	12	-0.0779718	0.200712	0.705805	0.92499	0.624149	1.37084	4.90924	0.897158	NA	NA
CD8+ T cell %leukocyte || id:ebi-a-GCST90001607	Crohn's disease	Weighted median	12	-0.0125683	0.0742142	0.865519	0.98751	0.853826	1.14213	NA	NA	NA	NA
CD4+CD8+ T cell %leukocyte || id:ebi-a-GCST90001608	Crohn's disease	Inverse variance weighted	17	0.00081782	0.0497599	0.986887	1.00082	0.907818	1.10335	15.1384	0.514529	0.0149973	0.549591
CD4+CD8+ T cell %leukocyte || id:ebi-a-GCST90001608	Crohn's disease	MR Egger	17	-0.0750243	0.133509	0.582457	0.927721	0.714121	1.20521	14.7636	0.468576	NA	NA
CD4+CD8+ T cell %leukocyte || id:ebi-a-GCST90001608	Crohn's disease	Weighted median	17	0.0394609	0.0728695	0.588143	1.04025	0.901799	1.19996	NA	NA	NA	NA
CD4+ CD8dim T cell Absolute Count || id:ebi-a-GCST90001609	Crohn's disease	Inverse variance weighted	16	0.0886823	0.0827906	0.284096	1.09273	0.929055	1.28525	52.4887	4.69e-06	0.0221038	0.553291
CD4+ CD8dim T cell Absolute Count || id:ebi-a-GCST90001609	Crohn's disease	MR Egger	16	-0.0248924	0.20522	0.90518	0.975415	0.652383	1.4584	51.1409	3.93e-06	NA	NA
CD4+ CD8dim T cell Absolute Count || id:ebi-a-GCST90001609	Crohn's disease	Weighted median	16	-0.0111872	0.0663117	0.866028	0.988875	0.868352	1.12613	NA	NA	NA	NA
CD4+ CD8dim T cell %lymphocyte || id:ebi-a-GCST90001610	Crohn's disease	Inverse variance weighted	18	0.0848452	0.071337	0.234299	1.08855	0.946508	1.2519	51.9115	2.12e-05	0.0109779	0.714015
CD4+ CD8dim T cell %lymphocyte || id:ebi-a-GCST90001610	Crohn's disease	MR Egger	18	0.0277213	0.169733	0.87231	1.02811	0.737156	1.4339	51.4639	1.34e-05	NA	NA
CD4+ CD8dim T cell %lymphocyte || id:ebi-a-GCST90001610	Crohn's disease	Weighted median	18	0.00113841	0.0599601	0.984852	1.00114	0.890134	1.12599	NA	NA	NA	NA
CD4+ CD8dim T cell %leukocyte || id:ebi-a-GCST90001611	Crohn's disease	Inverse variance weighted	16	0.0872616	0.0770085	0.257155	1.09118	0.93831	1.26896	49.4756	1.47e-05	0.0250773	0.459795
CD4+ CD8dim T cell %leukocyte || id:ebi-a-GCST90001611	Crohn's disease	MR Egger	16	-0.0379106	0.182263	0.838225	0.962799	0.673581	1.3762	47.5147	1.58e-05	NA	NA
CD4+ CD8dim T cell %leukocyte || id:ebi-a-GCST90001611	Crohn's disease	Weighted median	16	0.004396	0.0618467	0.943335	1.00441	0.889742	1.13385	NA	NA	NA	NA
CD8dim T cell %leukocyte || id:ebi-a-GCST90001612	Crohn's disease	Inverse variance weighted	14	-0.0314767	0.0671296	0.639145	0.969014	0.849548	1.10528	17.133	0.193297	-0.0222262	0.481201
CD8dim T cell %leukocyte || id:ebi-a-GCST90001612	Crohn's disease	MR Egger	14	0.0719844	0.157898	0.656608	1.07464	0.7886	1.46443	16.4103	0.173159	NA	NA
CD8dim T cell %leukocyte || id:ebi-a-GCST90001612	Crohn's disease	Weighted median	14	0.0295525	0.0856546	0.73008	1.02999	0.870811	1.21827	NA	NA	NA	NA
CD4-CD8- T cell %leukocyte || id:ebi-a-GCST90001613	Crohn's disease	Inverse variance weighted	17	0.0165994	0.0626991	0.791205	1.01674	0.899163	1.14969	24.6584	0.0760784	-0.0259795	0.428247
CD4-CD8- T cell %leukocyte || id:ebi-a-GCST90001613	Crohn's disease	MR Egger	17	0.162764	0.190368	0.406003	1.17676	0.810295	1.70896	23.6147	0.071933	NA	NA
CD4-CD8- T cell %leukocyte || id:ebi-a-GCST90001613	Crohn's disease	Weighted median	17	0.0219357	0.0723338	0.761694	1.02218	0.887064	1.17787	NA	NA	NA	NA
CD8+ and CD8dim T cell %leukocyte || id:ebi-a-GCST90001614	Crohn's disease	Inverse variance weighted	10	0.00239229	0.0587058	0.967495	1.0024	0.893444	1.12463	7.83408	0.55095	0.038581	0.287369
CD8+ and CD8dim T cell %leukocyte || id:ebi-a-GCST90001614	Crohn's disease	MR Egger	10	-0.234876	0.216298	0.30916	0.790669	0.517462	1.20812	6.53508	0.587519	NA	NA
CD8+ and CD8dim T cell %leukocyte || id:ebi-a-GCST90001614	Crohn's disease	Weighted median	10	-0.0303226	0.0791915	0.701792	0.970132	0.830657	1.13303	NA	NA	NA	NA
TCRgd T cell Absolute Count || id:ebi-a-GCST90001615	Crohn's disease	Inverse variance weighted	15	0.0133574	0.0546659	0.806964	1.01345	0.910476	1.12806	14.2323	0.43255	0.0671526	0.0177681
TCRgd T cell Absolute Count || id:ebi-a-GCST90001615	Crohn's disease	MR Egger	15	-0.348272	0.143926	0.0309171	0.705907	0.532396	0.935966	6.87512	0.908472	NA	NA
TCRgd T cell Absolute Count || id:ebi-a-GCST90001615	Crohn's disease	Weighted median	15	-0.0275637	0.0765774	0.718887	0.972813	0.837231	1.13035	NA	NA	NA	NA
TCRgd T cell %T cell || id:ebi-a-GCST90001616	Crohn's disease	Inverse variance weighted	13	0.0555873	0.0536608	0.300248	1.05716	0.951622	1.17441	6.42555	0.893131	-0.0171508	0.47663
TCRgd T cell %T cell || id:ebi-a-GCST90001616	Crohn's disease	MR Egger	13	0.151553	0.140857	0.30499	1.16364	0.882914	1.53362	5.88258	0.881083	NA	NA
TCRgd T cell %T cell || id:ebi-a-GCST90001616	Crohn's disease	Weighted median	13	0.0680644	0.0693877	0.326628	1.07043	0.934321	1.22638	NA	NA	NA	NA
TCRgd T cell %lymphocyte || id:ebi-a-GCST90001617	Crohn's disease	Inverse variance weighted	12	0.0463929	0.0554917	0.403136	1.04749	0.939534	1.16784	11.2686	0.421043	-0.0096646	0.667499
TCRgd T cell %lymphocyte || id:ebi-a-GCST90001617	Crohn's disease	MR Egger	12	0.10335	0.141015	0.480446	1.10888	0.841104	1.4619	11.0521	0.353471	NA	NA
TCRgd T cell %lymphocyte || id:ebi-a-GCST90001617	Crohn's disease	Weighted median	12	0.0682434	0.0743645	0.358782	1.07063	0.925417	1.23862	NA	NA	NA	NA
HLA DR+ T cell Absolute Count || id:ebi-a-GCST90001618	Crohn's disease	Inverse variance weighted	18	0.0852019	0.0376991	0.0238181	1.08894	1.01138	1.17245	17.182	0.442101	-0.0441121	0.0158137
HLA DR+ T cell Absolute Count || id:ebi-a-GCST90001618	Crohn's disease	MR Egger	18	0.287824	0.0839247	0.00343883	1.33352	1.13126	1.57195	9.89898	0.87185	NA	NA
HLA DR+ T cell Absolute Count || id:ebi-a-GCST90001618	Crohn's disease	Weighted median	18	0.171472	0.052267	0.00103552	1.18705	1.07147	1.3151	NA	NA	NA	NA
HLA DR+ T cell%T cell || id:ebi-a-GCST90001619	Crohn's disease	Inverse variance weighted	19	0.112934	0.0539325	0.0362613	1.11956	1.00725	1.24439	34.9034	0.00972057	-0.0323842	0.101727
HLA DR+ T cell%T cell || id:ebi-a-GCST90001619	Crohn's disease	MR Egger	19	0.256634	0.0975583	0.017534	1.29257	1.06761	1.56494	29.678	0.0287631	NA	NA
HLA DR+ T cell%T cell || id:ebi-a-GCST90001619	Crohn's disease	Weighted median	19	0.180473	0.052054	0.000526247	1.19778	1.08161	1.32644	NA	NA	NA	NA
HLA DR+ T cell%lymphocyte || id:ebi-a-GCST90001620	Crohn's disease	Inverse variance weighted	15	0.0917489	0.0396125	0.0205494	1.09609	1.01421	1.18458	14.8251	0.390211	-0.0366534	0.0472013
HLA DR+ T cell%lymphocyte || id:ebi-a-GCST90001620	Crohn's disease	MR Egger	15	0.236256	0.0763455	0.00853554	1.2665	1.09048	1.47093	10.0211	0.692209	NA	NA
HLA DR+ T cell%lymphocyte || id:ebi-a-GCST90001620	Crohn's disease	Weighted median	15	0.179744	0.0510928	0.000434832	1.19691	1.08286	1.32298	NA	NA	NA	NA
Natural Killer T Absolute Count || id:ebi-a-GCST90001621	Crohn's disease	Inverse variance weighted	25	0.0536637	0.0437718	0.220203	1.05513	0.968382	1.14965	28.6612	0.233143	0.0129	0.5409
Natural Killer T Absolute Count || id:ebi-a-GCST90001621	Crohn's disease	MR Egger	25	-0.0235579	0.132077	0.859998	0.976717	0.75395	1.2653	28.189	0.208719	NA	NA
Natural Killer T Absolute Count || id:ebi-a-GCST90001621	Crohn's disease	Weighted median	25	0.0809538	0.0589985	0.170022	1.08432	0.965911	1.21725	NA	NA	NA	NA
Natural Killer T %T cell || id:ebi-a-GCST90001622	Crohn's disease	Inverse variance weighted	23	0.0257427	0.0437596	0.556347	1.02608	0.94174	1.11797	26.0014	0.251621	0.0105224	0.640826
Natural Killer T %T cell || id:ebi-a-GCST90001622	Crohn's disease	MR Egger	23	-0.0347634	0.135359	0.799815	0.965834	0.740768	1.25928	25.7269	0.217055	NA	NA
Natural Killer T %T cell || id:ebi-a-GCST90001622	Crohn's disease	Weighted median	23	0.00679613	0.0582219	0.907076	1.00682	0.898239	1.12852	NA	NA	NA	NA
Natural Killer T %lymphocyte || id:ebi-a-GCST90001623	Crohn's disease	Inverse variance weighted	26	0.0611342	0.042183	0.147265	1.06304	0.978686	1.15467	30.3996	0.209676	0.016706	0.468187
Natural Killer T %lymphocyte || id:ebi-a-GCST90001623	Crohn's disease	MR Egger	26	-0.0388121	0.142115	0.78711	0.961931	0.728071	1.27091	29.7266	0.193981	NA	NA
Natural Killer T %lymphocyte || id:ebi-a-GCST90001623	Crohn's disease	Weighted median	26	0.0201235	0.0565447	0.721925	1.02033	0.913288	1.13991	NA	NA	NA	NA
HLA DR+ CD4+ T cell Absolute Count || id:ebi-a-GCST90001624	Crohn's disease	Inverse variance weighted	15	0.127294	0.0522312	0.0148045	1.13575	1.02523	1.25818	16.0157	0.312416	-0.0535495	0.0633127
HLA DR+ CD4+ T cell Absolute Count || id:ebi-a-GCST90001624	Crohn's disease	MR Egger	15	0.435899	0.159658	0.0171749	1.54635	1.13085	2.11452	11.8939	0.536359	NA	NA
HLA DR+ CD4+ T cell Absolute Count || id:ebi-a-GCST90001624	Crohn's disease	Weighted median	15	0.174249	0.0691791	0.0117753	1.19035	1.03941	1.36321	NA	NA	NA	NA
HLA DR+ CD4+ T cell %T cell || id:ebi-a-GCST90001625	Crohn's disease	Inverse variance weighted	18	0.145258	0.0489081	0.00297792	1.15634	1.05064	1.27267	16.5362	0.48619	-0.0121328	0.534736
HLA DR+ CD4+ T cell %T cell || id:ebi-a-GCST90001625	Crohn's disease	MR Egger	18	0.226833	0.137629	0.118818	1.25462	0.957987	1.6431	16.1304	0.443899	NA	NA
HLA DR+ CD4+ T cell %T cell || id:ebi-a-GCST90001625	Crohn's disease	Weighted median	18	0.196195	0.0724228	0.00674815	1.21676	1.05574	1.40234	NA	NA	NA	NA
HLA DR+ CD4+ T cell %lymphocyte || id:ebi-a-GCST90001626	Crohn's disease	Inverse variance weighted	17	0.137805	0.0531577	0.00953169	1.14775	1.03419	1.27379	19.604	0.238586	-0.0138518	0.50728
HLA DR+ CD4+ T cell %lymphocyte || id:ebi-a-GCST90001626	Crohn's disease	MR Egger	17	0.225055	0.139357	0.127154	1.25239	0.953053	1.64575	19.0189	0.212878	NA	NA
HLA DR+ CD4+ T cell %lymphocyte || id:ebi-a-GCST90001626	Crohn's disease	Weighted median	17	0.20833	0.0707739	0.00324418	1.23162	1.07209	1.41488	NA	NA	NA	NA
HLA DR+ CD8+ T cell Absolute Count || id:ebi-a-GCST90001627	Crohn's disease	Inverse variance weighted	24	0.0732827	0.039555	0.0639283	1.07603	0.995764	1.16278	28.4254	0.200121	-0.0410511	0.0212986
HLA DR+ CD8+ T cell Absolute Count || id:ebi-a-GCST90001627	Crohn's disease	MR Egger	24	0.260679	0.0836097	0.00501186	1.29781	1.10164	1.52891	22.2169	0.447006	NA	NA
HLA DR+ CD8+ T cell Absolute Count || id:ebi-a-GCST90001627	Crohn's disease	Weighted median	24	0.162454	0.0536458	0.0024596	1.17639	1.05898	1.30682	NA	NA	NA	NA
HLA DR+ CD8+ T cell %T cell || id:ebi-a-GCST90001628	Crohn's disease	Inverse variance weighted	19	0.0487895	0.052071	0.348769	1.05	0.948124	1.16282	33.686	0.0137678	-0.0526288	0.00963101
HLA DR+ CD8+ T cell %T cell || id:ebi-a-GCST90001628	Crohn's disease	MR Egger	19	0.283708	0.0916737	0.00657806	1.32804	1.10963	1.58945	22.4549	0.167853	NA	NA
HLA DR+ CD8+ T cell %T cell || id:ebi-a-GCST90001628	Crohn's disease	Weighted median	19	0.172848	0.0539856	0.00136599	1.18869	1.06933	1.32136	NA	NA	NA	NA
HLA DR+ CD8+ T cell %lymphocyte || id:ebi-a-GCST90001629	Crohn's disease	Inverse variance weighted	23	0.0488033	0.0478409	0.307674	1.05001	0.956031	1.15324	39.5647	0.0121488	-0.0505279	0.0146391
HLA DR+ CD8+ T cell %lymphocyte || id:ebi-a-GCST90001629	Crohn's disease	MR Egger	23	0.267911	0.0926097	0.00870353	1.30723	1.09024	1.56741	29.5917	0.100506	NA	NA
HLA DR+ CD8+ T cell %lymphocyte || id:ebi-a-GCST90001629	Crohn's disease	Weighted median	23	0.171581	0.0523946	0.00105741	1.18718	1.07132	1.31558	NA	NA	NA	NA
CD8+ Natural Killer T Absolute Count || id:ebi-a-GCST90001630	Crohn's disease	Inverse variance weighted	19	0.0457452	0.0553874	0.408853	1.04681	0.939118	1.16685	23.8271	0.160776	-0.0117696	0.675141
CD8+ Natural Killer T Absolute Count || id:ebi-a-GCST90001630	Crohn's disease	MR Egger	19	0.125955	0.196452	0.529973	1.13423	0.771754	1.66696	23.5749	0.131454	NA	NA
CD8+ Natural Killer T Absolute Count || id:ebi-a-GCST90001630	Crohn's disease	Weighted median	19	0.104398	0.0675886	0.122441	1.11004	0.972315	1.26728	NA	NA	NA	NA
CD8+ Natural Killer T %T cell || id:ebi-a-GCST90001631	Crohn's disease	Inverse variance weighted	20	-0.0429254	0.0521883	0.410787	0.957983	0.864837	1.06116	26.2267	0.123995	-0.0142312	0.587102
CD8+ Natural Killer T %T cell || id:ebi-a-GCST90001631	Crohn's disease	MR Egger	20	0.0381228	0.15592	0.809608	1.03886	0.765305	1.41019	25.7887	0.104689	NA	NA
CD8+ Natural Killer T %T cell || id:ebi-a-GCST90001631	Crohn's disease	Weighted median	20	-0.0700606	0.0656754	0.286075	0.932337	0.819727	1.06042	NA	NA	NA	NA
CD8+ Natural Killer T %lymphocyte || id:ebi-a-GCST90001632	Crohn's disease	Inverse variance weighted	20	-0.00881837	0.0599215	0.883002	0.99122	0.881382	1.11475	28.372	0.076527	-0.0206964	0.49022
CD8+ Natural Killer T %lymphocyte || id:ebi-a-GCST90001632	Crohn's disease	MR Egger	20	0.120674	0.193615	0.540925	1.12826	0.771969	1.64898	27.6109	0.0682281	NA	NA
CD8+ Natural Killer T %lymphocyte || id:ebi-a-GCST90001632	Crohn's disease	Weighted median	20	-0.0275963	0.0721265	0.702009	0.972781	0.844539	1.1205	NA	NA	NA	NA
CD8dim Natural Killer T Absolute Count || id:ebi-a-GCST90001633	Crohn's disease	Inverse variance weighted	22	0.0585764	0.0564961	0.299819	1.06033	0.949181	1.18449	32.5847	0.0510297	-0.0266326	0.295911
CD8dim Natural Killer T Absolute Count || id:ebi-a-GCST90001633	Crohn's disease	MR Egger	22	0.199722	0.143047	0.17796	1.22106	0.922517	1.61623	30.8101	0.0577485	NA	NA
CD8dim Natural Killer T Absolute Count || id:ebi-a-GCST90001633	Crohn's disease	Weighted median	22	0.0354566	0.0683025	0.603683	1.03609	0.906272	1.18451	NA	NA	NA	NA
CD8dim Natural Killer T %T cell || id:ebi-a-GCST90001634	Crohn's disease	Inverse variance weighted	15	0.0613016	0.0676364	0.364756	1.06322	0.931214	1.21394	22.2682	0.0732684	-0.00540034	0.841028
CD8dim Natural Killer T %T cell || id:ebi-a-GCST90001634	Crohn's disease	MR Egger	15	0.0873989	0.145517	0.558427	1.09133	0.820522	1.45152	22.1967	0.0523876	NA	NA
CD8dim Natural Killer T %T cell || id:ebi-a-GCST90001634	Crohn's disease	Weighted median	15	0.119578	0.0745271	0.108605	1.12702	0.973853	1.30428	NA	NA	NA	NA
CD8dim Natural Killer T %lymphocyte || id:ebi-a-GCST90001635	Crohn's disease	Inverse variance weighted	20	0.0632711	0.057654	0.272454	1.06532	0.951486	1.19276	28.6445	0.0717868	-0.0276666	0.266624
CD8dim Natural Killer T %lymphocyte || id:ebi-a-GCST90001635	Crohn's disease	MR Egger	20	0.203648	0.13514	0.149175	1.22587	0.94061	1.59763	26.6952	0.0848919	NA	NA
CD8dim Natural Killer T %lymphocyte || id:ebi-a-GCST90001635	Crohn's disease	Weighted median	20	0.0848016	0.0710363	0.232565	1.0885	0.947025	1.25111	NA	NA	NA	NA
CD4-CD8- Natural Killer T Absolute Count || id:ebi-a-GCST90001636	Crohn's disease	Inverse variance weighted	10	-0.0268104	0.102822	0.794289	0.973546	0.795852	1.19091	26.1967	0.00189689	-0.00545994	0.940832
CD4-CD8- Natural Killer T Absolute Count || id:ebi-a-GCST90001636	Crohn's disease	MR Egger	10	0.00601483	0.442246	0.989482	1.00603	0.422829	2.39364	26.1775	0.00097928	NA	NA
CD4-CD8- Natural Killer T Absolute Count || id:ebi-a-GCST90001636	Crohn's disease	Weighted median	10	-0.0436296	0.0910366	0.631758	0.957308	0.800866	1.14431	NA	NA	NA	NA
CD4-CD8- Natural Killer T %T cell || id:ebi-a-GCST90001637	Crohn's disease	Inverse variance weighted	21	0.0325763	0.0583393	0.576576	1.03311	0.921485	1.15826	34.1193	0.0253288	-0.0335634	0.212555
CD4-CD8- Natural Killer T %T cell || id:ebi-a-GCST90001637	Crohn's disease	MR Egger	21	0.197529	0.140167	0.174921	1.21839	0.925707	1.60361	31.3719	0.0367348	NA	NA
CD4-CD8- Natural Killer T %T cell || id:ebi-a-GCST90001637	Crohn's disease	Weighted median	21	0.000758905	0.0687325	0.99119	1.00076	0.874628	1.14508	NA	NA	NA	NA
CD4-CD8- Natural Killer T %lymphocyte || id:ebi-a-GCST90001638	Crohn's disease	Inverse variance weighted	22	0.0594861	0.0527617	0.259553	1.06129	0.957024	1.17692	29.0607	0.112551	-0.0174538	0.487642
CD4-CD8- Natural Killer T %lymphocyte || id:ebi-a-GCST90001638	Crohn's disease	MR Egger	22	0.145341	0.132637	0.286197	1.15643	0.891698	1.49977	28.3519	0.101327	NA	NA
CD4-CD8- Natural Killer T %lymphocyte || id:ebi-a-GCST90001638	Crohn's disease	Weighted median	22	0.0140074	0.0695395	0.840362	1.01411	0.884892	1.16219	NA	NA	NA	NA
CD3- lymphocyte Absolute Count || id:ebi-a-GCST90001639	Crohn's disease	Inverse variance weighted	15	0.046597	0.0848921	0.583076	1.0477	0.887105	1.23737	35.6793	0.0011652	0.0085864	0.868282
CD3- lymphocyte Absolute Count || id:ebi-a-GCST90001639	Crohn's disease	MR Egger	15	-0.006377	0.325305	0.984658	0.993643	0.525201	1.8799	35.6009	0.000684104	NA	NA
CD3- lymphocyte Absolute Count || id:ebi-a-GCST90001639	Crohn's disease	Weighted median	15	-0.06365	0.0795819	0.423824	0.938333	0.802815	1.09673	NA	NA	NA	NA
CD3- lymphocyte %lymphocyte || id:ebi-a-GCST90001640	Crohn's disease	Inverse variance weighted	5	-0.210853	0.085917	0.0141217	0.809893	0.684374	0.958433	5.24538	0.263033	0.0251162	0.688612
CD3- lymphocyte %lymphocyte || id:ebi-a-GCST90001640	Crohn's disease	MR Egger	5	-0.331304	0.289152	0.335	0.717987	0.407366	1.26546	4.9251	0.177364	NA	NA
CD3- lymphocyte %lymphocyte || id:ebi-a-GCST90001640	Crohn's disease	Weighted median	5	-0.190026	0.110226	0.0847143	0.826937	0.666264	1.02636	NA	NA	NA	NA
CD3- lymphocyte %leukocyte || id:ebi-a-GCST90001641	Crohn's disease	Inverse variance weighted	11	-0.00511789	0.0613106	0.933474	0.994895	0.882244	1.12193	9.05044	0.527323	0.0369771	0.420374
CD3- lymphocyte %leukocyte || id:ebi-a-GCST90001641	Crohn's disease	MR Egger	11	-0.24553	0.291271	0.421088	0.78229	0.44201	1.38453	8.33759	0.500516	NA	NA
CD3- lymphocyte %leukocyte || id:ebi-a-GCST90001641	Crohn's disease	Weighted median	11	-0.0174732	0.0788827	0.824696	0.982679	0.841909	1.14699	NA	NA	NA	NA
B cell Absolute Count || id:ebi-a-GCST90001642	Crohn's disease	Inverse variance weighted	27	-0.00998107	0.050261	0.842587	0.990069	0.897186	1.09257	37.2376	0.0711474	-0.017857	0.607363
B cell Absolute Count || id:ebi-a-GCST90001642	Crohn's disease	MR Egger	27	0.116893	0.249074	0.642915	1.124	0.689842	1.8314	36.8386	0.0598041	NA	NA
B cell Absolute Count || id:ebi-a-GCST90001642	Crohn's disease	Weighted median	27	-0.0270792	0.0598456	0.65092	0.973284	0.865562	1.09441	NA	NA	NA	NA
B cell %CD3- lymphocyte || id:ebi-a-GCST90001643	Crohn's disease	Inverse variance weighted	15	0.0770868	0.0548413	0.159833	1.08014	0.970055	1.20271	15.3811	0.352607	0.0192409	0.578747
B cell %CD3- lymphocyte || id:ebi-a-GCST90001643	Crohn's disease	MR Egger	15	-0.0340216	0.203046	0.869511	0.966551	0.649214	1.439	15.0068	0.30693	NA	NA
B cell %CD3- lymphocyte || id:ebi-a-GCST90001643	Crohn's disease	Weighted median	15	0.0202193	0.0764662	0.791455	1.02043	0.878399	1.18542	NA	NA	NA	NA
B cell %lymphocyte || id:ebi-a-GCST90001644	Crohn's disease	Inverse variance weighted	24	0.0196939	0.049469	0.690553	1.01989	0.925644	1.12373	35.8979	0.0422538	-0.0142051	0.624874
B cell %lymphocyte || id:ebi-a-GCST90001644	Crohn's disease	MR Egger	24	0.111808	0.192438	0.567139	1.1183	0.766922	1.63066	35.501	0.0343187	NA	NA
B cell %lymphocyte || id:ebi-a-GCST90001644	Crohn's disease	Weighted median	24	-0.0355978	0.0593438	0.548602	0.965028	0.859064	1.08406	NA	NA	NA	NA
Natural Killer Absolute Count || id:ebi-a-GCST90001645	Crohn's disease	Inverse variance weighted	17	-0.0431623	0.0696626	0.535527	0.957756	0.83552	1.09787	34.1689	0.00515531	-0.0056863	0.903162
Natural Killer Absolute Count || id:ebi-a-GCST90001645	Crohn's disease	MR Egger	17	-0.00694389	0.301395	0.981923	0.99308	0.550087	1.79282	34.1341	0.00326078	NA	NA
Natural Killer Absolute Count || id:ebi-a-GCST90001645	Crohn's disease	Weighted median	17	-0.0252031	0.0725737	0.728384	0.975112	0.845821	1.12417	NA	NA	NA	NA
Natural Killer %CD3- lymphocyte || id:ebi-a-GCST90001646	Crohn's disease	Inverse variance weighted	11	-0.0950403	0.0852645	0.264999	0.909336	0.769389	1.07474	19.4091	0.0353642	-0.0580285	0.421315
Natural Killer %CD3- lymphocyte || id:ebi-a-GCST90001646	Crohn's disease	MR Egger	11	0.241922	0.409193	0.568924	1.27369	0.571154	2.84039	17.9901	0.0352883	NA	NA
Natural Killer %CD3- lymphocyte || id:ebi-a-GCST90001646	Crohn's disease	Weighted median	11	-0.0511156	0.0866995	0.555478	0.950169	0.801679	1.12616	NA	NA	NA	NA
Natural Killer %lymphocyte || id:ebi-a-GCST90001647	Crohn's disease	Inverse variance weighted	16	-0.0381903	0.0687343	0.578469	0.96253	0.841214	1.10134	30.7407	0.00951379	-0.029646	0.394388
Natural Killer %lymphocyte || id:ebi-a-GCST90001647	Crohn's disease	MR Egger	16	0.12503	0.198242	0.538401	1.13318	0.768339	1.67127	29.1339	0.010023	NA	NA
Natural Killer %lymphocyte || id:ebi-a-GCST90001647	Crohn's disease	Weighted median	16	-0.0689551	0.0727095	0.342944	0.933369	0.809397	1.07633	NA	NA	NA	NA
HLA DR+ Natural Killer Absolute Count || id:ebi-a-GCST90001648	Crohn's disease	Inverse variance weighted	18	0.043414	0.0385039	0.259522	1.04437	0.968455	1.12624	14.4201	0.637173	-0.0200182	0.213151
HLA DR+ Natural Killer Absolute Count || id:ebi-a-GCST90001648	Crohn's disease	MR Egger	18	0.117403	0.0688385	0.107438	1.12457	0.982632	1.28702	12.7389	0.691745	NA	NA
HLA DR+ Natural Killer Absolute Count || id:ebi-a-GCST90001648	Crohn's disease	Weighted median	18	0.064549	0.0521317	0.215645	1.06668	0.96307	1.18143	NA	NA	NA	NA
HLA DR+ Natural Killer %Natural Killer || id:ebi-a-GCST90001649	Crohn's disease	Inverse variance weighted	16	0.0248747	0.0480575	0.604736	1.02519	0.93303	1.12645	26.6662	0.0315767	-0.00789443	0.691362
HLA DR+ Natural Killer %Natural Killer || id:ebi-a-GCST90001649	Crohn's disease	MR Egger	16	0.0572849	0.0940184	0.55209	1.05896	0.880741	1.27324	26.3569	0.0233092	NA	NA
HLA DR+ Natural Killer %Natural Killer || id:ebi-a-GCST90001649	Crohn's disease	Weighted median	16	0.0175322	0.0512573	0.732318	1.01769	0.920414	1.12524	NA	NA	NA	NA
HLA DR+ Natural Killer %CD3- lymphocyte || id:ebi-a-GCST90001650	Crohn's disease	Inverse variance weighted	16	0.0874696	0.0418449	0.036588	1.09141	1.00547	1.1847	17.8421	0.271055	-0.00371627	0.811117
HLA DR+ Natural Killer %CD3- lymphocyte || id:ebi-a-GCST90001650	Crohn's disease	MR Egger	16	0.102144	0.0741541	0.189993	1.10754	0.957722	1.2808	17.7669	0.217606	NA	NA
HLA DR+ Natural Killer %CD3- lymphocyte || id:ebi-a-GCST90001650	Crohn's disease	Weighted median	16	0.0978723	0.0528733	0.0641589	1.10282	0.994257	1.22324	NA	NA	NA	NA
Granulocyte Absolute Count || id:ebi-a-GCST90001651	Crohn's disease	Inverse variance weighted	17	-0.0960954	0.080061	0.230032	0.908377	0.776456	1.06271	36.7752	0.00225531	0.01023	0.785239
Granulocyte Absolute Count || id:ebi-a-GCST90001651	Crohn's disease	MR Egger	17	-0.162501	0.253173	0.530653	0.850015	0.517514	1.39615	36.5875	0.00145334	NA	NA
Granulocyte Absolute Count || id:ebi-a-GCST90001651	Crohn's disease	Weighted median	17	-0.0141029	0.0770087	0.854693	0.985996	0.84786	1.14664	NA	NA	NA	NA
Granulocyte %leukocyte || id:ebi-a-GCST90001652	Crohn's disease	Inverse variance weighted	16	0.0159827	0.0723381	0.825136	1.01611	0.881791	1.17089	28.327	0.0196095	-0.0329046	0.509294
Granulocyte %leukocyte || id:ebi-a-GCST90001652	Crohn's disease	MR Egger	16	0.23599	0.333112	0.490301	1.26616	0.65908	2.43243	27.4284	0.0169263	NA	NA
Granulocyte %leukocyte || id:ebi-a-GCST90001652	Crohn's disease	Weighted median	16	-0.00652125	0.0749042	0.930623	0.9935	0.857844	1.15061	NA	NA	NA	NA
CD28- CD4-CD8- T cell %CD4-CD8- T cell || id:ebi-a-GCST90001653	Crohn's disease	Inverse variance weighted	22	0.0401689	0.0451145	0.373263	1.04099	0.95289	1.13723	19.5691	0.548682	-0.0513353	0.0688387
CD28- CD4-CD8- T cell %CD4-CD8- T cell || id:ebi-a-GCST90001653	Crohn's disease	MR Egger	22	0.347042	0.165836	0.0493347	1.41488	1.02225	1.95831	15.8713	0.724579	NA	NA
CD28- CD4-CD8- T cell %CD4-CD8- T cell || id:ebi-a-GCST90001653	Crohn's disease	Weighted median	22	-0.00241553	0.0658483	0.970738	0.997587	0.876798	1.13502	NA	NA	NA	NA
CD28- CD4-CD8- T cell Absolute Count || id:ebi-a-GCST90001654	Crohn's disease	Inverse variance weighted	27	0.0314407	0.0409725	0.442867	1.03194	0.952309	1.11823	24.0816	0.571301	0.00273154	0.912716
CD28- CD4-CD8- T cell Absolute Count || id:ebi-a-GCST90001654	Crohn's disease	MR Egger	27	0.015187	0.1524	0.921415	1.0153	0.75313	1.36874	24.0693	0.515372	NA	NA
CD28- CD4-CD8- T cell Absolute Count || id:ebi-a-GCST90001654	Crohn's disease	Weighted median	27	-0.00488051	0.0600245	0.935196	0.995131	0.884681	1.11937	NA	NA	NA	NA
CD28+ CD4-CD8- T cell %T cell || id:ebi-a-GCST90001655	Crohn's disease	Inverse variance weighted	20	-0.124234	0.0751889	0.0984757	0.883173	0.762156	1.02341	44.3583	0.000842268	-0.0420111	0.405447
CD28+ CD4-CD8- T cell %T cell || id:ebi-a-GCST90001655	Crohn's disease	MR Egger	20	0.114513	0.290297	0.69787	1.12133	0.634785	1.98079	42.6391	0.000899739	NA	NA
CD28+ CD4-CD8- T cell %T cell || id:ebi-a-GCST90001655	Crohn's disease	Weighted median	20	-0.0501854	0.0810184	0.535632	0.951053	0.81141	1.11473	NA	NA	NA	NA
CD28+ CD4-CD8- T cell %CD4-CD8- T cell || id:ebi-a-GCST90001656	Crohn's disease	Inverse variance weighted	22	-0.0401689	0.0451145	0.373263	0.960627	0.879331	1.04944	19.5691	0.548682	0.0513353	0.0688387
CD28+ CD4-CD8- T cell %CD4-CD8- T cell || id:ebi-a-GCST90001656	Crohn's disease	MR Egger	22	-0.347042	0.165836	0.0493347	0.706776	0.510645	0.978238	15.8713	0.724579	NA	NA
CD28+ CD4-CD8- T cell %CD4-CD8- T cell || id:ebi-a-GCST90001656	Crohn's disease	Weighted median	22	0.00241553	0.0678777	0.971612	1.00242	0.877547	1.14506	NA	NA	NA	NA
CD28+ CD4-CD8- T cell Absolute Count || id:ebi-a-GCST90001657	Crohn's disease	Inverse variance weighted	8	0.0688728	0.106204	0.516662	1.0713	0.869979	1.31921	12.6147	0.0820728	0.0588095	0.284069
CD28+ CD4-CD8- T cell Absolute Count || id:ebi-a-GCST90001657	Crohn's disease	MR Egger	8	-0.294258	0.325594	0.400951	0.745084	0.393599	1.41045	10.2511	0.114469	NA	NA
CD28+ CD4-CD8- T cell Absolute Count || id:ebi-a-GCST90001657	Crohn's disease	Weighted median	8	0.0845035	0.111794	0.449717	1.08818	0.874055	1.35475	NA	NA	NA	NA
CD39+ CD4+ T cell %T cell || id:ebi-a-GCST90001658	Crohn's disease	Inverse variance weighted	19	-0.0111868	0.0357722	0.754491	0.988876	0.921917	1.0607	19.3163	0.372595	0.000330725	0.984839
CD39+ CD4+ T cell %T cell || id:ebi-a-GCST90001658	Crohn's disease	MR Egger	19	-0.0127183	0.0875317	0.886184	0.987362	0.831703	1.17215	19.3159	0.310706	NA	NA
CD39+ CD4+ T cell %T cell || id:ebi-a-GCST90001658	Crohn's disease	Weighted median	19	-0.0207019	0.048229	0.667747	0.979511	0.89116	1.07662	NA	NA	NA	NA
CD39+ CD4+ T cell %CD4+ T cell || id:ebi-a-GCST90001659	Crohn's disease	Inverse variance weighted	14	-0.0162911	0.0375029	0.664	0.983841	0.914117	1.05888	11.8215	0.54233	0.00265407	0.894264
CD39+ CD4+ T cell %CD4+ T cell || id:ebi-a-GCST90001659	Crohn's disease	MR Egger	14	-0.0271816	0.088553	0.764141	0.973185	0.818121	1.15764	11.8031	0.46162	NA	NA
CD39+ CD4+ T cell %CD4+ T cell || id:ebi-a-GCST90001659	Crohn's disease	Weighted median	14	-0.0526553	0.0493161	0.285652	0.948707	0.861298	1.04499	NA	NA	NA	NA
CD39+ CD4+ T cell Absolute Count || id:ebi-a-GCST90001660	Crohn's disease	Inverse variance weighted	21	0.00275127	0.0332187	0.933992	1.00276	0.939547	1.07022	15.7401	0.732609	0.0192821	0.30833
CD39+ CD4+ T cell Absolute Count || id:ebi-a-GCST90001660	Crohn's disease	MR Egger	21	-0.0774232	0.0834841	0.365351	0.925498	0.785801	1.09003	14.6444	0.744917	NA	NA
CD39+ CD4+ T cell Absolute Count || id:ebi-a-GCST90001660	Crohn's disease	Weighted median	21	-0.0293395	0.0471389	0.533676	0.971087	0.885386	1.06508	NA	NA	NA	NA
CD28- CD8dim T cell %T cell || id:ebi-a-GCST90001661	Crohn's disease	Inverse variance weighted	18	0.0220231	0.0540383	0.683607	1.02227	0.919531	1.13648	20.6368	0.242957	-0.00394892	0.891053
CD28- CD8dim T cell %T cell || id:ebi-a-GCST90001661	Crohn's disease	MR Egger	18	0.0460443	0.18136	0.802819	1.04712	0.733872	1.49408	20.6119	0.193916	NA	NA
CD28- CD8dim T cell %T cell || id:ebi-a-GCST90001661	Crohn's disease	Weighted median	18	0.0397837	0.0751086	0.596332	1.04059	0.89814	1.20562	NA	NA	NA	NA
CD28- CD8dim T cell %CD8dim T cell || id:ebi-a-GCST90001662	Crohn's disease	Inverse variance weighted	12	0.0891423	0.0648319	0.169139	1.09324	0.962782	1.24137	5.06294	0.92808	-0.00801773	0.850842
CD28- CD8dim T cell %CD8dim T cell || id:ebi-a-GCST90001662	Crohn's disease	MR Egger	12	0.139241	0.267587	0.614138	1.1494	0.680295	1.94199	5.0257	0.889455	NA	NA
CD28- CD8dim T cell %CD8dim T cell || id:ebi-a-GCST90001662	Crohn's disease	Weighted median	12	0.124741	0.0851693	0.143025	1.13285	0.958686	1.33866	NA	NA	NA	NA
CD28- CD8dim T cell Absolute Count || id:ebi-a-GCST90001663	Crohn's disease	Inverse variance weighted	16	-0.0188632	0.0480343	0.694539	0.981314	0.893141	1.07819	11.1245	0.743718	0.0134056	0.638622
CD28- CD8dim T cell Absolute Count || id:ebi-a-GCST90001663	Crohn's disease	MR Egger	16	-0.0969039	0.169524	0.576639	0.907643	0.651049	1.26537	10.8941	0.694335	NA	NA
CD28- CD8dim T cell Absolute Count || id:ebi-a-GCST90001663	Crohn's disease	Weighted median	16	0.0321795	0.068606	0.639036	1.0327	0.902769	1.18134	NA	NA	NA	NA
CD28+ CD45RA+ CD8dim T cell %T cell || id:ebi-a-GCST90001664	Crohn's disease	Inverse variance weighted	16	0.0296563	0.0790858	0.707669	1.0301	0.882186	1.20281	35.6247	0.00200192	0.000406127	0.993714
CD28+ CD45RA+ CD8dim T cell %T cell || id:ebi-a-GCST90001664	Crohn's disease	MR Egger	16	0.0269998	0.341172	0.938043	1.02737	0.526398	2.00511	35.6245	0.00118731	NA	NA
CD28+ CD45RA+ CD8dim T cell %T cell || id:ebi-a-GCST90001664	Crohn's disease	Weighted median	16	-0.0263993	0.0773464	0.732868	0.973946	0.836944	1.13337	NA	NA	NA	NA
CD28+ CD45RA+ CD8dim T cell %CD8dim T cell || id:ebi-a-GCST90001665	Crohn's disease	Inverse variance weighted	15	-0.0343535	0.0515803	0.505399	0.96623	0.873322	1.06902	11.7659	0.625094	0.0165775	0.614347
CD28+ CD45RA+ CD8dim T cell %CD8dim T cell || id:ebi-a-GCST90001665	Crohn's disease	MR Egger	15	-0.136698	0.204846	0.516237	0.872234	0.583801	1.30317	11.4994	0.569055	NA	NA
CD28+ CD45RA+ CD8dim T cell %CD8dim T cell || id:ebi-a-GCST90001665	Crohn's disease	Weighted median	15	-0.104615	0.074329	0.159291	0.900671	0.778567	1.04192	NA	NA	NA	NA
CD28+ CD45RA+ CD8dim T cell Absolute Count || id:ebi-a-GCST90001666	Crohn's disease	Inverse variance weighted	14	0.0168095	0.0588871	0.775297	1.01695	0.906097	1.14137	9.64263	0.722864	-0.014628	0.702346
CD28+ CD45RA+ CD8dim T cell Absolute Count || id:ebi-a-GCST90001666	Crohn's disease	MR Egger	14	0.122371	0.27604	0.665429	1.13017	0.657923	1.9414	9.48942	0.660656	NA	NA
CD28+ CD45RA+ CD8dim T cell Absolute Count || id:ebi-a-GCST90001666	Crohn's disease	Weighted median	14	-0.0387086	0.0784416	0.62168	0.962031	0.824932	1.12191	NA	NA	NA	NA
CD28+ CD45RA- CD8dim T cell %T cell || id:ebi-a-GCST90001667	Crohn's disease	Inverse variance weighted	15	-0.0518672	0.0662351	0.433581	0.949455	0.833861	1.08107	19.588	0.143674	-0.0268257	0.434962
CD28+ CD45RA- CD8dim T cell %T cell || id:ebi-a-GCST90001667	Crohn's disease	MR Egger	15	0.119405	0.222934	0.601274	1.12683	0.727934	1.7443	18.6566	0.13414	NA	NA
CD28+ CD45RA- CD8dim T cell %T cell || id:ebi-a-GCST90001667	Crohn's disease	Weighted median	15	-0.131873	0.08217	0.108521	0.876452	0.746077	1.02961	NA	NA	NA	NA
CD28+ CD45RA- CD8dim T cell %CD8dim T cell || id:ebi-a-GCST90001668	Crohn's disease	Inverse variance weighted	18	-0.0942885	0.0515264	0.0672639	0.91002	0.822604	1.00673	13.498	0.702265	-0.00728826	0.81676
CD28+ CD45RA- CD8dim T cell %CD8dim T cell || id:ebi-a-GCST90001668	Crohn's disease	MR Egger	18	-0.0481674	0.202457	0.814968	0.952974	0.640835	1.41715	13.4425	0.640172	NA	NA
CD28+ CD45RA- CD8dim T cell %CD8dim T cell || id:ebi-a-GCST90001668	Crohn's disease	Weighted median	18	-0.0616299	0.0717102	0.390103	0.940231	0.816946	1.08212	NA	NA	NA	NA
CD28+ CD45RA- CD8dim T cell Absolute Count || id:ebi-a-GCST90001669	Crohn's disease	Inverse variance weighted	13	0.0676977	0.0598653	0.258125	1.07004	0.951574	1.20326	10.9455	0.533592	-0.00286201	0.913923
CD28+ CD45RA- CD8dim T cell Absolute Count || id:ebi-a-GCST90001669	Crohn's disease	MR Egger	13	0.0848175	0.165959	0.6194	1.08852	0.786264	1.50696	10.9333	0.448868	NA	NA
CD28+ CD45RA- CD8dim T cell Absolute Count || id:ebi-a-GCST90001669	Crohn's disease	Weighted median	13	0.0281813	0.0829446	0.734037	1.02858	0.874249	1.21016	NA	NA	NA	NA
CD39+ CD8+ T cell %T cell || id:ebi-a-GCST90001670	Crohn's disease	Inverse variance weighted	15	0.0294222	0.0412769	0.475969	1.02986	0.949822	1.11664	11.7001	0.630371	0.0069542	0.683922
CD39+ CD8+ T cell %T cell || id:ebi-a-GCST90001670	Crohn's disease	MR Egger	15	0.0054917	0.0707591	0.939319	1.00551	0.875293	1.15509	11.5268	0.566778	NA	NA
CD39+ CD8+ T cell %T cell || id:ebi-a-GCST90001670	Crohn's disease	Weighted median	15	0.0222952	0.0559309	0.690173	1.02255	0.916375	1.14102	NA	NA	NA	NA
CD39+ CD8+ T cell %CD8+ T cell || id:ebi-a-GCST90001671	Crohn's disease	Inverse variance weighted	16	0.0115788	0.0433915	0.789588	1.01165	0.929165	1.10145	17.2898	0.301838	-0.00960005	0.646114
CD39+ CD8+ T cell %CD8+ T cell || id:ebi-a-GCST90001671	Crohn's disease	MR Egger	16	0.0437647	0.0817962	0.601014	1.04474	0.88998	1.2264	17.0221	0.255004	NA	NA
CD39+ CD8+ T cell %CD8+ T cell || id:ebi-a-GCST90001671	Crohn's disease	Weighted median	16	0.0138706	0.0541026	0.797661	1.01397	0.91195	1.1274	NA	NA	NA	NA
CD39+ CD8+ T cell Absolute Count || id:ebi-a-GCST90001672	Crohn's disease	Inverse variance weighted	17	0.015716	0.0376056	0.676009	1.01584	0.943658	1.09354	15.4559	0.491535	0.00114901	0.947272
CD39+ CD8+ T cell Absolute Count || id:ebi-a-GCST90001672	Crohn's disease	MR Egger	17	0.011909	0.0682747	0.863862	1.01198	0.885229	1.15688	15.4512	0.419428	NA	NA
CD39+ CD8+ T cell Absolute Count || id:ebi-a-GCST90001672	Crohn's disease	Weighted median	17	0.00189695	0.0537885	0.971867	1.0019	0.90165	1.11329	NA	NA	NA	NA
CD28- CD127- CD25++ CD8+ T cell %T cell || id:ebi-a-GCST90001673	Crohn's disease	Inverse variance weighted	14	-0.0590549	0.0553887	0.286338	0.942655	0.845678	1.05075	10.897	0.619448	-0.0137419	0.639413
CD28- CD127- CD25++ CD8+ T cell %T cell || id:ebi-a-GCST90001673	Crohn's disease	MR Egger	14	0.0227225	0.17893	0.901051	1.02298	0.720377	1.4527	10.666	0.557742	NA	NA
CD28- CD127- CD25++ CD8+ T cell %T cell || id:ebi-a-GCST90001673	Crohn's disease	Weighted median	14	-0.055335	0.0776061	0.475831	0.946168	0.81266	1.10161	NA	NA	NA	NA
CD28- CD127- CD25++ CD8+ T cell %CD8+ T cell || id:ebi-a-GCST90001674	Crohn's disease	Inverse variance weighted	14	-0.0295196	0.0554269	0.59432	0.970912	0.870962	1.08233	13.1391	0.437123	0.0210472	0.61338
CD28- CD127- CD25++ CD8+ T cell %CD8+ T cell || id:ebi-a-GCST90001674	Crohn's disease	MR Egger	14	-0.149937	0.239047	0.54226	0.860762	0.538769	1.37519	12.851	0.379965	NA	NA
CD28- CD127- CD25++ CD8+ T cell %CD8+ T cell || id:ebi-a-GCST90001674	Crohn's disease	Weighted median	14	-0.017256	0.0793669	0.82788	0.982892	0.841293	1.14832	NA	NA	NA	NA
CD28- CD127- CD25++ CD8+ T cell Absolute Count || id:ebi-a-GCST90001675	Crohn's disease	Inverse variance weighted	21	-0.0680791	0.04621	0.140683	0.934187	0.853294	1.02275	12.8375	0.884246	0.0130685	0.610983
CD28- CD127- CD25++ CD8+ T cell Absolute Count || id:ebi-a-GCST90001675	Crohn's disease	MR Egger	21	-0.149753	0.164537	0.374146	0.860921	0.623601	1.18856	12.57	0.859837	NA	NA
CD28- CD127- CD25++ CD8+ T cell Absolute Count || id:ebi-a-GCST90001675	Crohn's disease	Weighted median	21	-0.0657549	0.0634852	0.300319	0.93636	0.826805	1.06043	NA	NA	NA	NA
CD28- CD25++ CD8+ T cell %T cell || id:ebi-a-GCST90001676	Crohn's disease	Inverse variance weighted	5	-0.100307	0.100755	0.319471	0.90456	0.742459	1.10205	5.74949	0.218654	-0.0022207	0.966148
CD28- CD25++ CD8+ T cell %T cell || id:ebi-a-GCST90001676	Crohn's disease	MR Egger	5	-0.0861448	0.328654	0.810201	0.917461	0.481761	1.7472	5.74542	0.124675	NA	NA
CD28- CD25++ CD8+ T cell %T cell || id:ebi-a-GCST90001676	Crohn's disease	Weighted median	5	-0.0622992	0.107405	0.561887	0.939602	0.761235	1.15976	NA	NA	NA	NA
CD28- CD25++ CD8+ T cell %CD8+ T cell || id:ebi-a-GCST90001677	Crohn's disease	Inverse variance weighted	15	-0.0209708	0.0570035	0.712958	0.979248	0.87573	1.095	10.6769	0.71121	-0.00381124	0.913794
CD28- CD25++ CD8+ T cell %CD8+ T cell || id:ebi-a-GCST90001677	Crohn's disease	MR Egger	15	0.00731731	0.262541	0.978188	1.00734	0.602141	1.68522	10.6647	0.638882	NA	NA
CD28- CD25++ CD8+ T cell %CD8+ T cell || id:ebi-a-GCST90001677	Crohn's disease	Weighted median	15	0.0110749	0.0739045	0.88088	1.01114	0.874784	1.16874	NA	NA	NA	NA
CD28- CD25++ CD8+ T cell Absolute Count || id:ebi-a-GCST90001678	Crohn's disease	Inverse variance weighted	12	-0.044592	0.0679284	0.511531	0.956388	0.837167	1.09259	12.5656	0.322663	-0.011625	0.778317
CD28- CD25++ CD8+ T cell Absolute Count || id:ebi-a-GCST90001678	Crohn's disease	MR Egger	12	0.0200051	0.234343	0.933655	1.02021	0.644482	1.61497	12.4614	0.255365	NA	NA
CD28- CD25++ CD8+ T cell Absolute Count || id:ebi-a-GCST90001678	Crohn's disease	Weighted median	12	-0.0610104	0.0878918	0.487586	0.940813	0.791933	1.11768	NA	NA	NA	NA
CD25++ CD8+ T cell %T cell || id:ebi-a-GCST90001679	Crohn's disease	Inverse variance weighted	10	-0.00409376	0.0874579	0.962666	0.995915	0.839028	1.18214	18.2391	0.0324991	-0.0758774	0.0962305
CD25++ CD8+ T cell %T cell || id:ebi-a-GCST90001679	Crohn's disease	MR Egger	10	0.41176	0.233779	0.116213	1.50947	0.954615	2.38683	12.6315	0.125174	NA	NA
CD25++ CD8+ T cell %T cell || id:ebi-a-GCST90001679	Crohn's disease	Weighted median	10	-0.0564486	0.0993394	0.569872	0.945115	0.777903	1.14827	NA	NA	NA	NA
CD25++ CD8+ T cell %CD8+ T cell || id:ebi-a-GCST90001680	Crohn's disease	Inverse variance weighted	17	0.0697293	0.0654783	0.286911	1.07222	0.943076	1.21904	30.0963	0.0175092	-0.0363976	0.24337
CD25++ CD8+ T cell %CD8+ T cell || id:ebi-a-GCST90001680	Crohn's disease	MR Egger	17	0.267188	0.174934	0.147481	1.30629	0.92711	1.84054	27.4022	0.0256252	NA	NA
CD25++ CD8+ T cell %CD8+ T cell || id:ebi-a-GCST90001680	Crohn's disease	Weighted median	17	0.133826	0.0765065	0.0802537	1.14319	0.984003	1.32814	NA	NA	NA	NA
CD25++ CD8+ T cell Absolute Count || id:ebi-a-GCST90001681	Crohn's disease	Inverse variance weighted	21	0.0830227	0.0533031	0.119338	1.08657	0.978777	1.20623	33.174	0.0322862	0.0188802	0.557611
CD25++ CD8+ T cell Absolute Count || id:ebi-a-GCST90001681	Crohn's disease	MR Egger	21	-0.0150718	0.173037	0.931502	0.985041	0.701717	1.38276	32.5634	0.0269799	NA	NA
CD25++ CD8+ T cell Absolute Count || id:ebi-a-GCST90001681	Crohn's disease	Weighted median	21	0.0556352	0.0654629	0.395396	1.05721	0.929906	1.20195	NA	NA	NA	NA
CD127- CD8+ T cell %T cell || id:ebi-a-GCST90001682	Crohn's disease	Inverse variance weighted	9	0.0642453	0.0788698	0.415316	1.06635	0.913621	1.24462	10.2789	0.245994	-0.0876358	0.0908284
CD127- CD8+ T cell %T cell || id:ebi-a-GCST90001682	Crohn's disease	MR Egger	9	0.567944	0.26625	0.0703451	1.76464	1.04717	2.97366	6.43755	0.489685	NA	NA
CD127- CD8+ T cell %T cell || id:ebi-a-GCST90001682	Crohn's disease	Weighted median	9	0.0233713	0.0943809	0.804422	1.02365	0.850769	1.23165	NA	NA	NA	NA
CD127- CD8+ T cell %CD8+ T cell || id:ebi-a-GCST90001683	Crohn's disease	Inverse variance weighted	9	0.0128137	0.0736302	0.861844	1.0129	0.876778	1.17015	7.22692	0.512359	-0.0915363	0.209784
CD127- CD8+ T cell %CD8+ T cell || id:ebi-a-GCST90001683	Crohn's disease	MR Egger	9	0.661643	0.475592	0.206779	1.93797	0.762985	4.92244	5.32002	0.620972	NA	NA
CD127- CD8+ T cell %CD8+ T cell || id:ebi-a-GCST90001683	Crohn's disease	Weighted median	9	0.0263494	0.099429	0.791004	1.0267	0.844905	1.24761	NA	NA	NA	NA
CD127- CD8+ T cell Absolute Count || id:ebi-a-GCST90001684	Crohn's disease	Inverse variance weighted	12	0.0595298	0.066833	0.373077	1.06134	0.931031	1.20988	15.6761	0.153588	0.000315464	0.993824
CD127- CD8+ T cell Absolute Count || id:ebi-a-GCST90001684	Crohn's disease	MR Egger	12	0.0575528	0.258777	0.828476	1.05924	0.637852	1.75902	15.676	0.109291	NA	NA
CD127- CD8+ T cell Absolute Count || id:ebi-a-GCST90001684	Crohn's disease	Weighted median	12	0.0772037	0.0827196	0.350656	1.08026	0.91858	1.2704	NA	NA	NA	NA
CD28- CD8+ T cell %T cell || id:ebi-a-GCST90001685	Crohn's disease	Inverse variance weighted	13	0.0749233	0.0572078	0.190308	1.0778	0.96348	1.20569	8.45741	0.748442	-0.00935909	0.782041
CD28- CD8+ T cell %T cell || id:ebi-a-GCST90001685	Crohn's disease	MR Egger	13	0.12562	0.187739	0.517215	1.13385	0.784783	1.63818	8.37703	0.679185	NA	NA
CD28- CD8+ T cell %T cell || id:ebi-a-GCST90001685	Crohn's disease	Weighted median	13	0.0233192	0.0783844	0.766087	1.02359	0.87782	1.19357	NA	NA	NA	NA
CD28- CD8+ T cell %CD8+ T cell || id:ebi-a-GCST90001686	Crohn's disease	Inverse variance weighted	17	0.0391184	0.0627678	0.533137	1.03989	0.919517	1.17603	18.6039	0.289738	-0.0412337	0.193641
CD28- CD8+ T cell %CD8+ T cell || id:ebi-a-GCST90001686	Crohn's disease	MR Egger	17	0.311582	0.209341	0.157368	1.36558	0.905991	2.05832	16.5593	0.345884	NA	NA
CD28- CD8+ T cell %CD8+ T cell || id:ebi-a-GCST90001686	Crohn's disease	Weighted median	17	0.170095	0.081371	0.0365853	1.18542	1.01066	1.39039	NA	NA	NA	NA
CD28- CD8+ T cell Absolute Count || id:ebi-a-GCST90001687	Crohn's disease	Inverse variance weighted	12	0.0776877	0.0672471	0.247985	1.08079	0.947322	1.23305	12.9225	0.298418	0.00439984	0.915182
CD28- CD8+ T cell Absolute Count || id:ebi-a-GCST90001687	Crohn's disease	MR Egger	12	0.0519885	0.24561	0.836616	1.05336	0.650895	1.70469	12.9071	0.22891	NA	NA
CD28- CD8+ T cell Absolute Count || id:ebi-a-GCST90001687	Crohn's disease	Weighted median	12	0.0202774	0.091659	0.824916	1.02048	0.852677	1.22132	NA	NA	NA	NA
CD28+ CD45RA+ CD8+ T cell %T cell || id:ebi-a-GCST90001688	Crohn's disease	Inverse variance weighted	14	-0.0698336	0.0766493	0.362253	0.932549	0.802466	1.08372	8.23752	0.827789	-0.0216282	0.617013
CD28+ CD45RA+ CD8+ T cell %T cell || id:ebi-a-GCST90001688	Crohn's disease	MR Egger	14	0.124382	0.386003	0.752822	1.13245	0.531431	2.41318	7.97397	0.787161	NA	NA
CD28+ CD45RA+ CD8+ T cell %T cell || id:ebi-a-GCST90001688	Crohn's disease	Weighted median	14	-0.0162437	0.10347	0.875254	0.983887	0.803285	1.2051	NA	NA	NA	NA
CD28+ CD45RA+ CD8+ T cell %CD8+ T cell || id:ebi-a-GCST90001689	Crohn's disease	Inverse variance weighted	14	-0.0505748	0.0775809	0.514467	0.950683	0.816578	1.10681	14.8262	0.318327	0.0268535	0.503783
CD28+ CD45RA+ CD8+ T cell %CD8+ T cell || id:ebi-a-GCST90001689	Crohn's disease	MR Egger	14	-0.284722	0.348828	0.430277	0.752223	0.379681	1.4903	14.2616	0.284314	NA	NA
CD28+ CD45RA+ CD8+ T cell %CD8+ T cell || id:ebi-a-GCST90001689	Crohn's disease	Weighted median	14	-0.0117974	0.101875	0.907809	0.988272	0.809392	1.20669	NA	NA	NA	NA
CD28+ CD45RA+ CD8+ T cell Absolute Count || id:ebi-a-GCST90001690	Crohn's disease	Inverse variance weighted	20	0.0982943	0.064701	0.12871	1.10329	0.971883	1.25246	20.7085	0.353132	-0.0332319	0.209707
CD28+ CD45RA+ CD8+ T cell Absolute Count || id:ebi-a-GCST90001690	Crohn's disease	MR Egger	20	0.368453	0.21718	0.107011	1.4455	0.944385	2.21251	18.9288	0.396218	NA	NA
CD28+ CD45RA+ CD8+ T cell Absolute Count || id:ebi-a-GCST90001690	Crohn's disease	Weighted median	20	0.167859	0.0903593	0.0632138	1.18277	0.990797	1.41194	NA	NA	NA	NA
CD28+ CD45RA- CD8+ T cell %T cell || id:ebi-a-GCST90001691	Crohn's disease	Inverse variance weighted	13	0.156595	0.0568103	0.00584331	1.16952	1.04629	1.30727	14.6248	0.2626	0.0142021	0.574422
CD28+ CD45RA- CD8+ T cell %T cell || id:ebi-a-GCST90001691	Crohn's disease	MR Egger	13	0.0752763	0.152182	0.630581	1.07818	0.800114	1.45289	14.1926	0.222517	NA	NA
CD28+ CD45RA- CD8+ T cell %T cell || id:ebi-a-GCST90001691	Crohn's disease	Weighted median	13	0.10003	0.0771467	0.19476	1.1052	0.95011	1.28562	NA	NA	NA	NA
CD28+ CD45RA- CD8+ T cell %CD8+ T cell || id:ebi-a-GCST90001692	Crohn's disease	Inverse variance weighted	18	0.00535968	0.0482955	0.911635	1.00537	0.914572	1.10519	17.4171	0.426475	0.0552738	0.0709638
CD28+ CD45RA- CD8+ T cell %CD8+ T cell || id:ebi-a-GCST90001692	Crohn's disease	MR Egger	18	-0.337501	0.183564	0.0846093	0.713551	0.497935	1.02253	13.6756	0.622868	NA	NA
CD28+ CD45RA- CD8+ T cell %CD8+ T cell || id:ebi-a-GCST90001692	Crohn's disease	Weighted median	18	-0.0454188	0.0666943	0.495872	0.955597	0.838501	1.08905	NA	NA	NA	NA
CD28+ CD45RA- CD8+ T cell Absolute Count || id:ebi-a-GCST90001693	Crohn's disease	Inverse variance weighted	18	0.0638359	0.0447923	0.154113	1.06592	0.976328	1.16373	12.7564	0.752337	0.0239903	0.377287
CD28+ CD45RA- CD8+ T cell Absolute Count || id:ebi-a-GCST90001693	Crohn's disease	MR Egger	18	-0.0796889	0.16427	0.634173	0.923404	0.66921	1.27415	11.9317	0.74867	NA	NA
CD28+ CD45RA- CD8+ T cell Absolute Count || id:ebi-a-GCST90001693	Crohn's disease	Weighted median	18	0.0606355	0.0633631	0.338591	1.06251	0.938421	1.20301	NA	NA	NA	NA
CD28- CD4-CD8- T cell %T cell || id:ebi-a-GCST90001694	Crohn's disease	Inverse variance weighted	21	0.0677618	0.047575	0.154355	1.07011	0.974837	1.1747	23.8641	0.248379	0.0277638	0.393821
CD28- CD4-CD8- T cell %T cell || id:ebi-a-GCST90001694	Crohn's disease	MR Egger	21	-0.0773166	0.173027	0.660038	0.925597	0.659383	1.29929	22.9448	0.239783	NA	NA
CD28- CD4-CD8- T cell %T cell || id:ebi-a-GCST90001694	Crohn's disease	Weighted median	21	0.00565888	0.0621497	0.927451	1.00567	0.890338	1.13595	NA	NA	NA	NA
CD45RA- CD28- CD8+ T cell Absolute Count || id:ebi-a-GCST90001695	Crohn's disease	Inverse variance weighted	15	-0.000622949	0.000698638	0.372574	0.999377	0.99801	1.00075	24.1655	0.0437568	-0.0557178	0.175091
CD45RA- CD28- CD8+ T cell Absolute Count || id:ebi-a-GCST90001695	Crohn's disease	MR Egger	15	0.00202154	0.00196291	0.321854	1.00202	0.998176	1.00589	20.8637	0.0756688	NA	NA
CD45RA- CD28- CD8+ T cell Absolute Count || id:ebi-a-GCST90001695	Crohn's disease	Weighted median	15	-0.00116663	0.000810243	0.149908	0.998834	0.997249	1.00042	NA	NA	NA	NA
CD45RA- CD28- CD8+ T cell %CD8+ T cell || id:ebi-a-GCST90001696	Crohn's disease	Inverse variance weighted	10	-0.000315233	0.00454027	0.944647	0.999685	0.990828	1.00862	10.5716	0.306217	-0.051258	0.110052
CD45RA- CD28- CD8+ T cell %CD8+ T cell || id:ebi-a-GCST90001696	Crohn's disease	MR Egger	10	0.0221812	0.0132011	0.131417	1.02243	0.996314	1.04923	7.34233	0.500188	NA	NA
CD45RA- CD28- CD8+ T cell %CD8+ T cell || id:ebi-a-GCST90001696	Crohn's disease	Weighted median	10	-0.00100808	0.0058889	0.86408	0.998992	0.987528	1.01059	NA	NA	NA	NA
CD45RA- CD28- CD8+ T cell %T cell || id:ebi-a-GCST90001697	Crohn's disease	Inverse variance weighted	13	0.00631003	0.0134493	0.638947	1.00633	0.980149	1.03321	15.5157	0.214438	-0.0497888	0.307222
CD45RA- CD28- CD8+ T cell %T cell || id:ebi-a-GCST90001697	Crohn's disease	MR Egger	13	0.0568939	0.0490973	0.271077	1.05854	0.961427	1.16547	14.0512	0.230172	NA	NA
CD45RA- CD28- CD8+ T cell %T cell || id:ebi-a-GCST90001697	Crohn's disease	Weighted median	13	-0.0013827	0.0159491	0.930915	0.998618	0.967884	1.03033	NA	NA	NA	NA
CD45RA+ CD28- CD8+ T cell Absolute Count || id:ebi-a-GCST90001698	Crohn's disease	Inverse variance weighted	22	0.000126935	0.000421759	0.76344	1.00013	0.999301	1.00095	24.6464	0.262805	0.0697567	0.489483
CD45RA+ CD28- CD8+ T cell Absolute Count || id:ebi-a-GCST90001698	Crohn's disease	MR Egger	22	-0.00161416	0.00250934	0.527363	0.998387	0.993489	1.00331	24.0502	0.240207	NA	NA
CD45RA+ CD28- CD8+ T cell Absolute Count || id:ebi-a-GCST90001698	Crohn's disease	Weighted median	22	4.26e-05	0.000569744	0.940331	1.00004	0.998927	1.00116	NA	NA	NA	NA
CD45RA+ CD28- CD8+ T cell %CD8+ T cell || id:ebi-a-GCST90001699	Crohn's disease	Inverse variance weighted	12	0.00478527	0.00501423	0.339913	1.0048	0.99497	1.01472	18.1213	0.0788084	-0.0235195	0.588051
CD45RA+ CD28- CD8+ T cell %CD8+ T cell || id:ebi-a-GCST90001699	Crohn's disease	MR Egger	12	0.0145433	0.0181895	0.442553	1.01465	0.979113	1.05148	17.571	0.0626459	NA	NA
CD45RA+ CD28- CD8+ T cell %CD8+ T cell || id:ebi-a-GCST90001699	Crohn's disease	Weighted median	12	0.00319549	0.00603957	0.596741	1.0032	0.991395	1.01515	NA	NA	NA	NA
CD45RA+ CD28- CD8+ T cell %T cell || id:ebi-a-GCST90001700	Crohn's disease	Inverse variance weighted	12	-0.0175855	0.0138645	0.204664	0.982568	0.956227	1.00964	21.3687	0.0297463	0.0175732	0.702917
CD45RA+ CD28- CD8+ T cell %T cell || id:ebi-a-GCST90001700	Crohn's disease	MR Egger	12	-0.034577	0.0456311	0.466082	0.966014	0.883368	1.05639	21.0445	0.0207855	NA	NA
CD45RA+ CD28- CD8+ T cell %T cell || id:ebi-a-GCST90001700	Crohn's disease	Weighted median	12	-0.0108998	0.0140993	0.439479	0.989159	0.962199	1.01688	NA	NA	NA	NA
BAFF-R on CD20- CD38- B cell || id:ebi-a-GCST90001701	Crohn's disease	Inverse variance weighted	10	0.00709756	0.055032	0.89738	1.00712	0.904145	1.12183	6.81333	0.656547	-0.027295	0.39232
BAFF-R on CD20- CD38- B cell || id:ebi-a-GCST90001701	Crohn's disease	MR Egger	10	0.101588	0.11811	0.414756	1.10693	0.878177	1.39526	5.99581	0.647701	NA	NA
BAFF-R on CD20- CD38- B cell || id:ebi-a-GCST90001701	Crohn's disease	Weighted median	10	0.0159404	0.0704854	0.821084	1.01607	0.884962	1.1666	NA	NA	NA	NA
BAFF-R on CD24+ CD27+ B cell || id:ebi-a-GCST90001702	Crohn's disease	Inverse variance weighted	13	0.0167831	0.0263111	0.523556	1.01692	0.965812	1.07074	9.53127	0.657007	0.0221371	0.155985
BAFF-R on CD24+ CD27+ B cell || id:ebi-a-GCST90001702	Crohn's disease	MR Egger	13	-0.0188293	0.0352004	0.603352	0.981347	0.915924	1.05144	7.21185	0.781677	NA	NA
BAFF-R on CD24+ CD27+ B cell || id:ebi-a-GCST90001702	Crohn's disease	Weighted median	13	0.00767856	0.029181	0.792446	1.00771	0.95169	1.06702	NA	NA	NA	NA
BAFF-R on IgD+ CD24+ B cell || id:ebi-a-GCST90001703	Crohn's disease	Inverse variance weighted	11	0.0161957	0.0268743	0.546743	1.01633	0.964179	1.0713	9.45158	0.489849	0.0289395	0.118743
BAFF-R on IgD+ CD24+ B cell || id:ebi-a-GCST90001703	Crohn's disease	MR Egger	11	-0.0264874	0.0365374	0.486908	0.97386	0.906558	1.04616	6.47837	0.691249	NA	NA
BAFF-R on IgD+ CD24+ B cell || id:ebi-a-GCST90001703	Crohn's disease	Weighted median	11	0.00793961	0.0299877	0.791193	1.00797	0.950434	1.06899	NA	NA	NA	NA
BAFF-R on IgD+ CD24- B cell || id:ebi-a-GCST90001704	Crohn's disease	Inverse variance weighted	16	0.0229704	0.0289653	0.42776	1.02324	0.966763	1.08301	19.3116	0.199958	0.013197	0.332238
BAFF-R on IgD+ CD24- B cell || id:ebi-a-GCST90001704	Crohn's disease	MR Egger	16	-0.00441294	0.039772	0.913226	0.995597	0.920935	1.07631	18.0136	0.206161	NA	NA
BAFF-R on IgD+ CD24- B cell || id:ebi-a-GCST90001704	Crohn's disease	Weighted median	16	0.00759356	0.0296942	0.798163	1.00762	0.950652	1.06801	NA	NA	NA	NA
BAFF-R on IgD+ CD38- B cell || id:ebi-a-GCST90001705	Crohn's disease	Inverse variance weighted	17	0.027669	0.027716	0.318133	1.02806	0.973698	1.08545	18.3289	0.304992	0.0275473	0.0268038
BAFF-R on IgD+ CD38- B cell || id:ebi-a-GCST90001705	Crohn's disease	MR Egger	17	-0.0286527	0.0345993	0.420579	0.971754	0.90804	1.03994	12.3044	0.655859	NA	NA
BAFF-R on IgD+ CD38- B cell || id:ebi-a-GCST90001705	Crohn's disease	Weighted median	17	0.00902576	0.0304261	0.766738	1.00907	0.95065	1.07107	NA	NA	NA	NA
BAFF-R on IgD+ CD38- naive B cell || id:ebi-a-GCST90001706	Crohn's disease	Inverse variance weighted	21	-0.00852345	0.0232063	0.713403	0.991513	0.947425	1.03765	24.5065	0.220967	-0.00760013	0.580285
BAFF-R on IgD+ CD38- naive B cell || id:ebi-a-GCST90001706	Crohn's disease	MR Egger	21	0.00630875	0.0353925	0.860413	1.00633	0.938887	1.07862	24.1049	0.192158	NA	NA
BAFF-R on IgD+ CD38- naive B cell || id:ebi-a-GCST90001706	Crohn's disease	Weighted median	21	0.00580086	0.0264885	0.826654	1.00582	0.954931	1.05942	NA	NA	NA	NA
BAFF-R on IgD+ CD38- unswitched memory B cell || id:ebi-a-GCST90001707	Crohn's disease	Inverse variance weighted	14	0.00645896	0.0242444	0.789923	1.00648	0.959771	1.05546	5.06371	0.973764	-0.00737626	0.658556
BAFF-R on IgD+ CD38- unswitched memory B cell || id:ebi-a-GCST90001707	Crohn's disease	MR Egger	14	0.0179453	0.0350775	0.61822	1.01811	0.950463	1.09057	4.85841	0.962542	NA	NA
BAFF-R on IgD+ CD38- unswitched memory B cell || id:ebi-a-GCST90001707	Crohn's disease	Weighted median	14	0.00977011	0.0282805	0.72974	1.00982	0.955367	1.06737	NA	NA	NA	NA
BAFF-R on IgD+ CD38+ B cell || id:ebi-a-GCST90001708	Crohn's disease	Inverse variance weighted	18	-0.00326858	0.0345166	0.924556	0.996737	0.931535	1.0665	30.4954	0.0229857	-0.0134744	0.429523
BAFF-R on IgD+ CD38+ B cell || id:ebi-a-GCST90001708	Crohn's disease	MR Egger	18	0.0259879	0.0501876	0.611673	1.02633	0.930178	1.13242	29.2926	0.0220359	NA	NA
BAFF-R on IgD+ CD38+ B cell || id:ebi-a-GCST90001708	Crohn's disease	Weighted median	18	0.00425893	0.0308504	0.8902	1.00427	0.945343	1.06687	NA	NA	NA	NA
BAFF-R on IgD+ CD38dim B cell || id:ebi-a-GCST90001709	Crohn's disease	Inverse variance weighted	16	0.0161183	0.0271008	0.552007	1.01625	0.963677	1.07169	17.343	0.298777	0.00878644	0.518288
BAFF-R on IgD+ CD38dim B cell || id:ebi-a-GCST90001709	Crohn's disease	MR Egger	16	-0.00166998	0.0385161	0.966029	0.998331	0.92574	1.07661	16.8155	0.266143	NA	NA
BAFF-R on IgD+ CD38dim B cell || id:ebi-a-GCST90001709	Crohn's disease	Weighted median	16	0.00696084	0.0284929	0.806998	1.00699	0.95229	1.06482	NA	NA	NA	NA
BAFF-R on IgD- CD24- B cell || id:ebi-a-GCST90001710	Crohn's disease	Inverse variance weighted	16	0.0399939	0.0320913	0.212671	1.0408	0.977355	1.10837	21.6919	0.116141	0.0348225	0.00916961
BAFF-R on IgD- CD24- B cell || id:ebi-a-GCST90001710	Crohn's disease	MR Egger	16	-0.0309842	0.0355571	0.398237	0.969491	0.904226	1.03947	12.568	0.560788	NA	NA
BAFF-R on IgD- CD24- B cell || id:ebi-a-GCST90001710	Crohn's disease	Weighted median	16	0.0111874	0.0302074	0.711118	1.01125	0.953116	1.07293	NA	NA	NA	NA
BAFF-R on IgD- CD27- B cell || id:ebi-a-GCST90001711	Crohn's disease	Inverse variance weighted	14	0.0200457	0.0272327	0.461678	1.02025	0.967219	1.07618	12.4669	0.489779	0.0209955	0.161151
BAFF-R on IgD- CD27- B cell || id:ebi-a-GCST90001711	Crohn's disease	MR Egger	14	-0.0173673	0.0370031	0.647234	0.982783	0.914029	1.05671	10.2366	0.595209	NA	NA
BAFF-R on IgD- CD27- B cell || id:ebi-a-GCST90001711	Crohn's disease	Weighted median	14	0.00834386	0.0304798	0.784277	1.00838	0.949902	1.07046	NA	NA	NA	NA
BAFF-R on IgD- CD38- B cell || id:ebi-a-GCST90001712	Crohn's disease	Inverse variance weighted	11	0.0127452	0.0265277	0.630907	1.01283	0.961511	1.06688	9.06589	0.525862	0.0292018	0.142044
BAFF-R on IgD- CD38- B cell || id:ebi-a-GCST90001712	Crohn's disease	MR Egger	11	-0.030491	0.0377579	0.440176	0.969969	0.900778	1.04448	6.47652	0.69144	NA	NA
BAFF-R on IgD- CD38- B cell || id:ebi-a-GCST90001712	Crohn's disease	Weighted median	11	0.00691218	0.0304754	0.82057	1.00694	0.948551	1.06891	NA	NA	NA	NA
BAFF-R on IgD- CD38+ B cell || id:ebi-a-GCST90001713	Crohn's disease	Inverse variance weighted	13	-0.0274405	0.0498228	0.581797	0.972933	0.882415	1.07274	6.60982	0.882285	-0.00877069	0.668085
BAFF-R on IgD- CD38+ B cell || id:ebi-a-GCST90001713	Crohn's disease	MR Egger	13	0.0114935	0.101456	0.911845	1.01156	0.829145	1.23411	6.41575	0.844235	NA	NA
BAFF-R on IgD- CD38+ B cell || id:ebi-a-GCST90001713	Crohn's disease	Weighted median	13	0.0231658	0.0681106	0.733766	1.02344	0.895538	1.1696	NA	NA	NA	NA
BAFF-R on IgD- CD38dim B cell || id:ebi-a-GCST90001714	Crohn's disease	Inverse variance weighted	3	0.214193	0.0977795	0.0284827	1.23886	1.0228	1.50056	1.59303	0.450897	-0.0926092	0.491172
BAFF-R on IgD- CD38dim B cell || id:ebi-a-GCST90001714	Crohn's disease	MR Egger	3	0.844337	0.620657	0.403544	2.32643	0.689251	7.85243	0.535992	0.464099	NA	NA
BAFF-R on IgD- CD38dim B cell || id:ebi-a-GCST90001714	Crohn's disease	Weighted median	3	0.250577	0.119461	0.0359436	1.28477	1.01657	1.62372	NA	NA	NA	NA
BAFF-R on memory B cell || id:ebi-a-GCST90001715	Crohn's disease	Inverse variance weighted	12	0.0171861	0.0266824	0.519511	1.01733	0.965498	1.07195	9.02925	0.619192	0.025567	0.131822
BAFF-R on memory B cell || id:ebi-a-GCST90001715	Crohn's disease	MR Egger	12	-0.022236	0.0359031	0.549546	0.978009	0.911552	1.04931	6.33623	0.786268	NA	NA
BAFF-R on memory B cell || id:ebi-a-GCST90001715	Crohn's disease	Weighted median	12	0.00795085	0.029464	0.787276	1.00798	0.951421	1.06791	NA	NA	NA	NA
BAFF-R on naive-mature B cell || id:ebi-a-GCST90001716	Crohn's disease	Inverse variance weighted	16	0.0226001	0.0254957	0.375387	1.02286	0.973	1.07527	13.4782	0.565412	0.0155037	0.250037
BAFF-R on naive-mature B cell || id:ebi-a-GCST90001716	Crohn's disease	MR Egger	16	-0.00847247	0.0363383	0.819015	0.991563	0.923397	1.06476	12.0381	0.603242	NA	NA
BAFF-R on naive-mature B cell || id:ebi-a-GCST90001716	Crohn's disease	Weighted median	16	0.0080723	0.028377	0.776053	1.0081	0.953566	1.06576	NA	NA	NA	NA
BAFF-R on unswitched memory B cell || id:ebi-a-GCST90001717	Crohn's disease	Inverse variance weighted	15	0.0160808	0.0259416	0.535335	1.01621	0.965833	1.06922	9.57344	0.792658	0.0167208	0.204378
BAFF-R on unswitched memory B cell || id:ebi-a-GCST90001717	Crohn's disease	MR Egger	15	-0.0137018	0.034201	0.695203	0.986392	0.922437	1.05478	7.78781	0.857144	NA	NA
BAFF-R on unswitched memory B cell || id:ebi-a-GCST90001717	Crohn's disease	Weighted median	15	0.00735653	0.0299309	0.80585	1.00738	0.949986	1.06825	NA	NA	NA	NA
BAFF-R on switched memory B cell || id:ebi-a-GCST90001718	Crohn's disease	Inverse variance weighted	10	0.0142708	0.0268489	0.595057	1.01437	0.962373	1.06918	9.06371	0.431414	0.0200447	0.214369
BAFF-R on switched memory B cell || id:ebi-a-GCST90001718	Crohn's disease	MR Egger	10	-0.0180207	0.0359034	0.629243	0.982141	0.915402	1.05374	7.24475	0.510471	NA	NA
BAFF-R on switched memory B cell || id:ebi-a-GCST90001718	Crohn's disease	Weighted median	10	0.00731333	0.0294774	0.804058	1.00734	0.95079	1.06725	NA	NA	NA	NA
BAFF-R on IgD+ B cell || id:ebi-a-GCST90001719	Crohn's disease	Inverse variance weighted	17	0.0156607	0.0268563	0.559806	1.01578	0.963698	1.07069	17.8672	0.33173	0.00739276	0.559079
BAFF-R on IgD+ B cell || id:ebi-a-GCST90001719	Crohn's disease	MR Egger	17	0.00034949	0.0375246	0.992692	1.00035	0.929416	1.0767	17.4518	0.292579	NA	NA
BAFF-R on IgD+ B cell || id:ebi-a-GCST90001719	Crohn's disease	Weighted median	17	0.00671115	0.0287392	0.815359	1.00673	0.951593	1.06507	NA	NA	NA	NA
BAFF-R on transitional B cell || id:ebi-a-GCST90001720	Crohn's disease	Inverse variance weighted	16	0.0228946	0.0375811	0.542388	1.02316	0.950503	1.10137	30.445	0.0104143	-0.0180796	0.278948
BAFF-R on transitional B cell || id:ebi-a-GCST90001720	Crohn's disease	MR Egger	16	0.0593208	0.0493288	0.249092	1.06112	0.963326	1.16883	27.9153	0.0146009	NA	NA
BAFF-R on transitional B cell || id:ebi-a-GCST90001720	Crohn's disease	Weighted median	16	0.0355754	0.0301177	0.237518	1.03622	0.976818	1.09923	NA	NA	NA	NA
CD19 on CD20- B cell || id:ebi-a-GCST90001721	Crohn's disease	Inverse variance weighted	17	0.0417125	0.0858616	0.627101	1.04259	0.881107	1.23368	37.0805	0.00204302	-0.086442	0.0296737
CD19 on CD20- B cell || id:ebi-a-GCST90001721	Crohn's disease	MR Egger	17	0.606407	0.246819	0.0266779	1.83383	1.13048	2.97479	26.7762	0.0306138	NA	NA
CD19 on CD20- B cell || id:ebi-a-GCST90001721	Crohn's disease	Weighted median	17	-0.0131055	0.0872197	0.880561	0.98698	0.831889	1.17098	NA	NA	NA	NA
CD19 on CD20- CD38- B cell || id:ebi-a-GCST90001722	Crohn's disease	Inverse variance weighted	14	-0.0179011	0.0573382	0.754887	0.982258	0.877846	1.09909	13.9949	0.374201	-0.0325515	0.314038
CD19 on CD20- CD38- B cell || id:ebi-a-GCST90001722	Crohn's disease	MR Egger	14	0.162715	0.181118	0.38665	1.1767	0.825078	1.67817	12.8156	0.382583	NA	NA
CD19 on CD20- CD38- B cell || id:ebi-a-GCST90001722	Crohn's disease	Weighted median	14	-0.0552075	0.0764238	0.470057	0.946289	0.814649	1.0992	NA	NA	NA	NA
CD19 on CD24+ CD27+ B cell || id:ebi-a-GCST90001723	Crohn's disease	Inverse variance weighted	19	-0.00782766	0.0611521	0.898147	0.992203	0.88013	1.11855	31.5772	0.0246595	0.0188691	0.586465
CD19 on CD24+ CD27+ B cell || id:ebi-a-GCST90001723	Crohn's disease	MR Egger	19	-0.117364	0.207155	0.578422	0.889261	0.59251	1.33464	31.0163	0.0198815	NA	NA
CD19 on CD24+ CD27+ B cell || id:ebi-a-GCST90001723	Crohn's disease	Weighted median	19	0.013891	0.0698442	0.842352	1.01399	0.88426	1.16275	NA	NA	NA	NA
CD19 on IgD+ CD24+ B cell || id:ebi-a-GCST90001724	Crohn's disease	Inverse variance weighted	21	-0.0517785	0.0530555	0.329099	0.949539	0.855758	1.0536	26.3785	0.153671	0.0032477	0.916897
CD19 on IgD+ CD24+ B cell || id:ebi-a-GCST90001724	Crohn's disease	MR Egger	21	-0.0704014	0.184335	0.706758	0.93202	0.649406	1.33762	26.363	0.120387	NA	NA
CD19 on IgD+ CD24+ B cell || id:ebi-a-GCST90001724	Crohn's disease	Weighted median	21	-0.0016855	0.0644682	0.979142	0.998316	0.879815	1.13278	NA	NA	NA	NA
CD19 on IgD+ CD24- B cell || id:ebi-a-GCST90001725	Crohn's disease	Inverse variance weighted	16	0.0349895	0.0494571	0.479273	1.03561	0.939933	1.14102	14.2137	0.509387	-0.0100513	0.74071
CD19 on IgD+ CD24- B cell || id:ebi-a-GCST90001725	Crohn's disease	MR Egger	16	0.0908937	0.172894	0.607311	1.09515	0.780376	1.5369	14.099	0.442365	NA	NA
CD19 on IgD+ CD24- B cell || id:ebi-a-GCST90001725	Crohn's disease	Weighted median	16	0.0887215	0.0713953	0.213985	1.09278	0.950076	1.25691	NA	NA	NA	NA
CD19 on IgD+ CD38- B cell || id:ebi-a-GCST90001726	Crohn's disease	Inverse variance weighted	20	0.0159087	0.0599755	0.790815	1.01604	0.903352	1.14278	28.3208	0.0774466	-0.0324577	0.303049
CD19 on IgD+ CD38- B cell || id:ebi-a-GCST90001726	Crohn's disease	MR Egger	20	0.198293	0.182111	0.29058	1.21932	0.8533	1.74234	26.6561	0.0856765	NA	NA
CD19 on IgD+ CD38- B cell || id:ebi-a-GCST90001726	Crohn's disease	Weighted median	20	0.0159326	0.0721218	0.825161	1.01606	0.882121	1.17034	NA	NA	NA	NA
CD19 on IgD+ CD38- naive B cell || id:ebi-a-GCST90001727	Crohn's disease	Inverse variance weighted	13	0.00552125	0.0609695	0.927844	1.00554	0.892277	1.13317	22.2189	0.0351381	-0.0669344	0.171571
CD19 on IgD+ CD38- naive B cell || id:ebi-a-GCST90001727	Crohn's disease	MR Egger	13	0.362868	0.251185	0.17644	1.43745	0.878574	2.35182	18.6017	0.0686281	NA	NA
CD19 on IgD+ CD38- naive B cell || id:ebi-a-GCST90001727	Crohn's disease	Weighted median	13	0.0607109	0.0650046	0.35033	1.06259	0.935478	1.20698	NA	NA	NA	NA
CD19 on IgD+ CD38- unswitched memory B cell || id:ebi-a-GCST90001728	Crohn's disease	Inverse variance weighted	9	0.0349722	0.0579888	0.546452	1.03559	0.92433	1.16024	3.33004	0.911973	-0.000318455	0.993864
CD19 on IgD+ CD38- unswitched memory B cell || id:ebi-a-GCST90001728	Crohn's disease	MR Egger	9	0.0363818	0.186139	0.850589	1.03705	0.720039	1.49364	3.32997	0.852893	NA	NA
CD19 on IgD+ CD38- unswitched memory B cell || id:ebi-a-GCST90001728	Crohn's disease	Weighted median	9	0.0271767	0.0776943	0.726497	1.02755	0.882405	1.19657	NA	NA	NA	NA
CD19 on IgD+ CD38+ B cell || id:ebi-a-GCST90001729	Crohn's disease	Inverse variance weighted	11	-0.0392719	0.0771401	0.610683	0.961489	0.826573	1.11843	16.1259	0.0960843	-0.00574934	0.917535
CD19 on IgD+ CD38+ B cell || id:ebi-a-GCST90001729	Crohn's disease	MR Egger	11	-0.00701165	0.313673	0.982654	0.993013	0.536972	1.83636	16.1056	0.0647084	NA	NA
CD19 on IgD+ CD38+ B cell || id:ebi-a-GCST90001729	Crohn's disease	Weighted median	11	-0.0692048	0.0832406	0.405758	0.933136	0.792664	1.0985	NA	NA	NA	NA
CD19 on IgD+ CD38dim B cell || id:ebi-a-GCST90001730	Crohn's disease	Inverse variance weighted	12	0.0703993	0.0540493	0.192745	1.07294	0.965087	1.19284	9.40617	0.584455	0.0280587	0.457989
CD19 on IgD+ CD38dim B cell || id:ebi-a-GCST90001730	Crohn's disease	MR Egger	12	-0.0918584	0.217026	0.681063	0.912234	0.596171	1.39586	8.81024	0.550202	NA	NA
CD19 on IgD+ CD38dim B cell || id:ebi-a-GCST90001730	Crohn's disease	Weighted median	12	0.107819	0.0709131	0.1284	1.11385	0.96931	1.27993	NA	NA	NA	NA
CD19 on IgD- CD24- B cell || id:ebi-a-GCST90001731	Crohn's disease	Inverse variance weighted	15	-0.115206	0.0604316	0.0566	0.891183	0.791637	1.00325	20.7147	0.109171	-0.0408581	0.188085
CD19 on IgD- CD24- B cell || id:ebi-a-GCST90001731	Crohn's disease	MR Egger	15	0.147652	0.198047	0.469211	1.15911	0.786219	1.70886	18.0368	0.156129	NA	NA
CD19 on IgD- CD24- B cell || id:ebi-a-GCST90001731	Crohn's disease	Weighted median	15	-0.0770223	0.0694378	0.267332	0.925869	0.808059	1.06086	NA	NA	NA	NA
CD19 on IgD- CD27- B cell || id:ebi-a-GCST90001732	Crohn's disease	Inverse variance weighted	17	-0.0861192	0.0591945	0.145711	0.917485	0.81698	1.03035	21.7829	0.150342	-0.0472765	0.135634
CD19 on IgD- CD27- B cell || id:ebi-a-GCST90001732	Crohn's disease	MR Egger	17	0.223642	0.204415	0.291188	1.25062	0.83777	1.86693	18.6848	0.228375	NA	NA
CD19 on IgD- CD27- B cell || id:ebi-a-GCST90001732	Crohn's disease	Weighted median	17	-0.0542079	0.0741095	0.4645	0.947235	0.819171	1.09532	NA	NA	NA	NA
CD19 on IgD- CD38- B cell || id:ebi-a-GCST90001733	Crohn's disease	Inverse variance weighted	19	-0.129673	0.0567689	0.0223588	0.878383	0.785889	0.981763	28.2615	0.0581855	0.0165933	0.536847
CD19 on IgD- CD38- B cell || id:ebi-a-GCST90001733	Crohn's disease	MR Egger	19	-0.22941	0.168433	0.190967	0.795002	0.571472	1.10597	27.616	0.0496295	NA	NA
CD19 on IgD- CD38- B cell || id:ebi-a-GCST90001733	Crohn's disease	Weighted median	19	-0.057402	0.0638777	0.368854	0.944214	0.833099	1.07015	NA	NA	NA	NA
CD19 on IgD- CD38+ B cell || id:ebi-a-GCST90001734	Crohn's disease	Inverse variance weighted	10	0.0506858	0.0760814	0.50528	1.05199	0.906256	1.22116	9.16247	0.422414	0.0501439	0.383806
CD19 on IgD- CD38+ B cell || id:ebi-a-GCST90001734	Crohn's disease	MR Egger	10	-0.270695	0.357151	0.470228	0.762849	0.378814	1.53621	8.28348	0.40628	NA	NA
CD19 on IgD- CD38+ B cell || id:ebi-a-GCST90001734	Crohn's disease	Weighted median	10	0.0731802	0.108679	0.500718	1.07592	0.869505	1.33135	NA	NA	NA	NA
CD19 on IgD- CD38dim B cell || id:ebi-a-GCST90001735	Crohn's disease	Inverse variance weighted	17	-0.0257956	0.0593496	0.663825	0.974534	0.867516	1.09475	26.4899	0.0475128	0.0115292	0.718575
CD19 on IgD- CD38dim B cell || id:ebi-a-GCST90001735	Crohn's disease	MR Egger	17	-0.0911337	0.188094	0.635022	0.912896	0.631411	1.31987	26.2539	0.0354374	NA	NA
CD19 on IgD- CD38dim B cell || id:ebi-a-GCST90001735	Crohn's disease	Weighted median	17	0.00759485	0.0682242	0.911361	1.00762	0.881505	1.15179	NA	NA	NA	NA
CD19 on memory B cell || id:ebi-a-GCST90001736	Crohn's disease	Inverse variance weighted	15	0.0626564	0.0812389	0.440552	1.06466	0.907945	1.24843	31.243	0.00512519	0.00487429	0.924225
CD19 on memory B cell || id:ebi-a-GCST90001736	Crohn's disease	MR Egger	15	0.0336166	0.311089	0.915597	1.03419	0.562076	1.90285	31.2204	0.00313018	NA	NA
CD19 on memory B cell || id:ebi-a-GCST90001736	Crohn's disease	Weighted median	15	0.177259	0.0816966	0.0300279	1.19394	1.01728	1.40128	NA	NA	NA	NA
CD19 on naive-mature B cell || id:ebi-a-GCST90001737	Crohn's disease	Inverse variance weighted	19	0.0347503	0.0478367	0.467572	1.03536	0.942698	1.13713	14.371	0.704604	-0.00448799	0.876808
CD19 on naive-mature B cell || id:ebi-a-GCST90001737	Crohn's disease	MR Egger	19	0.0599883	0.167357	0.724423	1.06182	0.764884	1.47404	14.3463	0.642458	NA	NA
CD19 on naive-mature B cell || id:ebi-a-GCST90001737	Crohn's disease	Weighted median	19	0.0886834	0.0672002	0.186939	1.09273	0.957884	1.24657	NA	NA	NA	NA
CD19 on unswitched memory B cell || id:ebi-a-GCST90001738	Crohn's disease	Inverse variance weighted	16	-0.0651203	0.0824912	0.429866	0.936955	0.797078	1.10138	27.696	0.0235511	0.0165087	0.701516
CD19 on unswitched memory B cell || id:ebi-a-GCST90001738	Crohn's disease	MR Egger	16	-0.169077	0.278959	0.554149	0.844443	0.488782	1.4589	27.3965	0.0170903	NA	NA
CD19 on unswitched memory B cell || id:ebi-a-GCST90001738	Crohn's disease	Weighted median	16	0.00666893	0.0912091	0.941713	1.00669	0.841894	1.20375	NA	NA	NA	NA
CD19 on Plasma Blast-Plasma Cell || id:ebi-a-GCST90001739	Crohn's disease	Inverse variance weighted	18	0.0550385	0.0549695	0.316704	1.05658	0.948663	1.17678	18.0728	0.384265	-0.0150267	0.637126
CD19 on Plasma Blast-Plasma Cell || id:ebi-a-GCST90001739	Crohn's disease	MR Egger	18	0.14088	0.187172	0.462574	1.15129	0.797737	1.66153	17.8153	0.334823	NA	NA
CD19 on Plasma Blast-Plasma Cell || id:ebi-a-GCST90001739	Crohn's disease	Weighted median	18	0.0987427	0.0766941	0.197925	1.10378	0.94973	1.28282	NA	NA	NA	NA
CD19 on switched memory B cell || id:ebi-a-GCST90001740	Crohn's disease	Inverse variance weighted	16	-0.0871321	0.0855059	0.308194	0.916556	0.775131	1.08378	45.4501	6.5e-05	0.00243886	0.957424
CD19 on switched memory B cell || id:ebi-a-GCST90001740	Crohn's disease	MR Egger	16	-0.100157	0.255456	0.70091	0.904696	0.548345	1.49263	45.4405	3.46e-05	NA	NA
CD19 on switched memory B cell || id:ebi-a-GCST90001740	Crohn's disease	Weighted median	16	0.0165607	0.0756671	0.826758	1.0167	0.876563	1.17924	NA	NA	NA	NA
CD19 on IgD+ B cell || id:ebi-a-GCST90001741	Crohn's disease	Inverse variance weighted	17	0.0358266	0.0549073	0.514083	1.03648	0.930725	1.15424	20.3147	0.20638	0.00678586	0.842957
CD19 on IgD+ B cell || id:ebi-a-GCST90001741	Crohn's disease	MR Egger	17	-0.00125206	0.192466	0.994895	0.998749	0.684899	1.45642	20.2598	0.16219	NA	NA
CD19 on IgD+ B cell || id:ebi-a-GCST90001741	Crohn's disease	Weighted median	17	0.0501585	0.0687281	0.465506	1.05144	0.918927	1.20306	NA	NA	NA	NA
CD19 on transitional B cell || id:ebi-a-GCST90001742	Crohn's disease	Inverse variance weighted	16	-0.0698141	0.0515325	0.175495	0.932567	0.842975	1.03168	15.117	0.443022	0.0367045	0.264322
CD19 on transitional B cell || id:ebi-a-GCST90001742	Crohn's disease	MR Egger	16	-0.29315	0.198798	0.162448	0.74591	0.505203	1.1013	13.7647	0.467381	NA	NA
CD19 on transitional B cell || id:ebi-a-GCST90001742	Crohn's disease	Weighted median	16	-0.0347858	0.0684061	0.61109	0.965812	0.844626	1.10439	NA	NA	NA	NA
CD20 on B cell || id:ebi-a-GCST90001743	Crohn's disease	Inverse variance weighted	15	-0.0215529	0.051637	0.676391	0.978678	0.884475	1.08291	20.0422	0.128816	-0.014334	0.686685
CD20 on B cell || id:ebi-a-GCST90001743	Crohn's disease	MR Egger	15	0.0573844	0.198625	0.777207	1.05906	0.717545	1.56313	19.7833	0.100748	NA	NA
CD20 on B cell || id:ebi-a-GCST90001743	Crohn's disease	Weighted median	15	0.0116778	0.0623294	0.851381	1.01175	0.895397	1.14321	NA	NA	NA	NA
CD20 on CD20- CD38- B cell || id:ebi-a-GCST90001744	Crohn's disease	Inverse variance weighted	12	-0.0700724	0.0642143	0.275173	0.932326	0.822068	1.05737	9.51814	0.574179	0.0109201	0.701324
CD20 on CD20- CD38- B cell || id:ebi-a-GCST90001744	Crohn's disease	MR Egger	12	-0.139107	0.186303	0.472452	0.870135	0.603952	1.25363	9.36232	0.498097	NA	NA
CD20 on CD20- CD38- B cell || id:ebi-a-GCST90001744	Crohn's disease	Weighted median	12	-0.152376	0.0879652	0.0832326	0.858665	0.722681	1.02024	NA	NA	NA	NA
CD20 on CD24+ CD27+ B cell || id:ebi-a-GCST90001745	Crohn's disease	Inverse variance weighted	21	0.08285	0.070977	0.243098	1.08638	0.945289	1.24853	53.9753	5.83e-05	0.030917	0.41418
CD20 on CD24+ CD27+ B cell || id:ebi-a-GCST90001745	Crohn's disease	MR Egger	21	-0.0751646	0.202336	0.714388	0.927591	0.623913	1.37908	52.0655	6.47e-05	NA	NA
CD20 on CD24+ CD27+ B cell || id:ebi-a-GCST90001745	Crohn's disease	Weighted median	21	0.00968968	0.0636825	0.879064	1.00974	0.891252	1.14397	NA	NA	NA	NA
CD20 on IgD+ CD24+ B cell || id:ebi-a-GCST90001746	Crohn's disease	Inverse variance weighted	15	0.0327151	0.0549397	0.551527	1.03326	0.927774	1.15073	12.0352	0.603478	0.00946982	0.758071
CD20 on IgD+ CD24+ B cell || id:ebi-a-GCST90001746	Crohn's disease	MR Egger	15	-0.0221447	0.182839	0.905451	0.978099	0.683514	1.39965	11.9362	0.532881	NA	NA
CD20 on IgD+ CD24+ B cell || id:ebi-a-GCST90001746	Crohn's disease	Weighted median	15	0.040249	0.0738435	0.585714	1.04107	0.900789	1.2032	NA	NA	NA	NA
CD20 on IgD+ CD24- B cell || id:ebi-a-GCST90001747	Crohn's disease	Inverse variance weighted	18	-0.0576567	0.0552992	0.297119	0.943974	0.84701	1.05204	34.3438	0.00757826	-0.0587024	0.0598287
CD20 on IgD+ CD24- B cell || id:ebi-a-GCST90001747	Crohn's disease	MR Egger	18	0.266473	0.167909	0.132074	1.30535	0.939292	1.81407	27.3346	0.0379102	NA	NA
CD20 on IgD+ CD24- B cell || id:ebi-a-GCST90001747	Crohn's disease	Weighted median	18	-0.0501062	0.0594689	0.399474	0.951128	0.846483	1.06871	NA	NA	NA	NA
CD20 on IgD+ CD38- B cell || id:ebi-a-GCST90001748	Crohn's disease	Inverse variance weighted	18	0.0550276	0.0542228	0.310181	1.05657	0.950042	1.17504	25.2634	0.0889681	0.000100872	0.997825
CD20 on IgD+ CD38- B cell || id:ebi-a-GCST90001748	Crohn's disease	MR Egger	18	0.0544683	0.209605	0.798285	1.05598	0.700222	1.59248	25.2634	0.0653153	NA	NA
CD20 on IgD+ CD38- B cell || id:ebi-a-GCST90001748	Crohn's disease	Weighted median	18	0.0263362	0.0642339	0.681802	1.02669	0.905234	1.16443	NA	NA	NA	NA
CD20 on IgD+ CD38- naive B cell || id:ebi-a-GCST90001749	Crohn's disease	Inverse variance weighted	15	0.0206992	0.0383341	0.589218	1.02091	0.947019	1.10058	11.0461	0.682408	-0.0363073	0.281676
CD20 on IgD+ CD38- naive B cell || id:ebi-a-GCST90001749	Crohn's disease	MR Egger	15	0.174822	0.142474	0.241564	1.19103	0.900841	1.57471	9.7846	0.711447	NA	NA
CD20 on IgD+ CD38- naive B cell || id:ebi-a-GCST90001749	Crohn's disease	Weighted median	15	-0.0185791	0.0539559	0.730592	0.981592	0.883086	1.09109	NA	NA	NA	NA
CD20 on IgD+ CD38- unswitched memory B cell || id:ebi-a-GCST90001750	Crohn's disease	Inverse variance weighted	15	-0.0472164	0.0383854	0.218674	0.953881	0.884749	1.02842	11.9029	0.614097	-0.0368386	0.333233
CD20 on IgD+ CD38- unswitched memory B cell || id:ebi-a-GCST90001750	Crohn's disease	MR Egger	15	0.126332	0.176898	0.48776	1.13466	0.802207	1.60488	10.8929	0.61979	NA	NA
CD20 on IgD+ CD38- unswitched memory B cell || id:ebi-a-GCST90001750	Crohn's disease	Weighted median	15	-0.0722732	0.0531309	0.17374	0.930277	0.838274	1.03238	NA	NA	NA	NA
CD20 on IgD+ CD38+ B cell || id:ebi-a-GCST90001751	Crohn's disease	Inverse variance weighted	18	0.00660167	0.0521227	0.899212	1.00662	0.908865	1.1149	26.6646	0.0631741	-0.0313822	0.300101
CD20 on IgD+ CD38+ B cell || id:ebi-a-GCST90001751	Crohn's disease	MR Egger	18	0.175375	0.165924	0.306229	1.19169	0.860848	1.64969	24.8812	0.0719481	NA	NA
CD20 on IgD+ CD38+ B cell || id:ebi-a-GCST90001751	Crohn's disease	Weighted median	18	0.0387467	0.0638065	0.543683	1.03951	0.917306	1.17799	NA	NA	NA	NA
CD20 on IgD+ CD38dim B cell || id:ebi-a-GCST90001752	Crohn's disease	Inverse variance weighted	25	-0.0622258	0.0544931	0.253494	0.939671	0.844482	1.04559	57.5984	0.000138319	-0.0249649	0.488328
CD20 on IgD+ CD38dim B cell || id:ebi-a-GCST90001752	Crohn's disease	MR Egger	25	0.0700857	0.195774	0.723613	1.0726	0.730789	1.57429	56.3825	0.000125127	NA	NA
CD20 on IgD+ CD38dim B cell || id:ebi-a-GCST90001752	Crohn's disease	Weighted median	25	-0.0769789	0.0563663	0.172037	0.925909	0.829065	1.03407	NA	NA	NA	NA
CD20 on IgD- CD24- B cell || id:ebi-a-GCST90001753	Crohn's disease	Inverse variance weighted	20	-0.0358786	0.0550297	0.51441	0.964757	0.866116	1.07463	28.5526	0.073356	0.00277353	0.930844
CD20 on IgD- CD24- B cell || id:ebi-a-GCST90001753	Crohn's disease	MR Egger	20	-0.0523611	0.195635	0.792014	0.948986	0.646744	1.39248	28.5403	0.0542946	NA	NA
CD20 on IgD- CD24- B cell || id:ebi-a-GCST90001753	Crohn's disease	Weighted median	20	-0.00976389	0.0680153	0.885852	0.990284	0.86669	1.1315	NA	NA	NA	NA
CD20 on IgD- CD27- B cell || id:ebi-a-GCST90001754	Crohn's disease	Inverse variance weighted	15	0.0696588	0.0638202	0.275059	1.07214	0.946079	1.215	23.3872	0.0542541	-0.0332466	0.497916
CD20 on IgD- CD27- B cell || id:ebi-a-GCST90001754	Crohn's disease	MR Egger	15	0.264724	0.287214	0.373476	1.30307	0.742141	2.28797	22.5441	0.0474844	NA	NA
CD20 on IgD- CD27- B cell || id:ebi-a-GCST90001754	Crohn's disease	Weighted median	15	0.0366382	0.0775397	0.636564	1.03732	0.891064	1.20758	NA	NA	NA	NA
CD20 on IgD- CD38- B cell || id:ebi-a-GCST90001755	Crohn's disease	Inverse variance weighted	22	-0.00524187	0.0471817	0.911537	0.994772	0.906905	1.09115	25.1849	0.239245	0.0230502	0.358111
CD20 on IgD- CD38- B cell || id:ebi-a-GCST90001755	Crohn's disease	MR Egger	22	-0.138211	0.149068	0.364891	0.870915	0.65026	1.16645	24.1179	0.23728	NA	NA
CD20 on IgD- CD38- B cell || id:ebi-a-GCST90001755	Crohn's disease	Weighted median	22	-0.0300297	0.0629919	0.63356	0.970417	0.857706	1.09794	NA	NA	NA	NA
CD20 on IgD- CD38+ B cell || id:ebi-a-GCST90001756	Crohn's disease	Inverse variance weighted	9	-0.060007	0.0719071	0.403995	0.941758	0.817958	1.0843	9.13792	0.330795	-0.0200363	0.590842
CD20 on IgD- CD38+ B cell || id:ebi-a-GCST90001756	Crohn's disease	MR Egger	9	0.0586033	0.223602	0.800799	1.06035	0.684096	1.64356	8.74173	0.271734	NA	NA
CD20 on IgD- CD38+ B cell || id:ebi-a-GCST90001756	Crohn's disease	Weighted median	9	-0.0935092	0.0914135	0.306343	0.91073	0.761337	1.08944	NA	NA	NA	NA
CD20 on IgD- CD38dim B cell || id:ebi-a-GCST90001757	Crohn's disease	Inverse variance weighted	25	-0.0474013	0.0388296	0.222181	0.953705	0.883815	1.02912	21.7785	0.592488	-0.00383011	0.84622
CD20 on IgD- CD38dim B cell || id:ebi-a-GCST90001757	Crohn's disease	MR Egger	25	-0.0265644	0.113106	0.816394	0.973785	0.780163	1.21546	21.74	0.535991	NA	NA
CD20 on IgD- CD38dim B cell || id:ebi-a-GCST90001757	Crohn's disease	Weighted median	25	-0.033948	0.0565465	0.548269	0.966622	0.865213	1.07992	NA	NA	NA	NA
CD20 on memory B cell || id:ebi-a-GCST90001758	Crohn's disease	Inverse variance weighted	21	0.012531	0.051605	0.808141	1.01261	0.915198	1.12039	27.3381	0.126017	0.0376463	0.112369
CD20 on memory B cell || id:ebi-a-GCST90001758	Crohn's disease	MR Egger	21	-0.21564	0.145712	0.15529	0.806026	0.605782	1.07246	23.8581	0.201651	NA	NA
CD20 on memory B cell || id:ebi-a-GCST90001758	Crohn's disease	Weighted median	21	0.0287205	0.0692446	0.678312	1.02914	0.898527	1.17873	NA	NA	NA	NA
CD20 on naive-mature B cell || id:ebi-a-GCST90001759	Crohn's disease	Inverse variance weighted	17	-0.00222841	0.0504497	0.964768	0.997774	0.903834	1.10148	23.5431	0.099969	-0.00997573	0.739962
CD20 on naive-mature B cell || id:ebi-a-GCST90001759	Crohn's disease	MR Egger	17	0.0559	0.179584	0.759876	1.05749	0.743724	1.50363	23.365	0.0766909	NA	NA
CD20 on naive-mature B cell || id:ebi-a-GCST90001759	Crohn's disease	Weighted median	17	-0.0568059	0.0637883	0.373177	0.944777	0.833742	1.0706	NA	NA	NA	NA
CD20 on unswitched memory B cell || id:ebi-a-GCST90001760	Crohn's disease	Inverse variance weighted	14	-0.00280449	0.0834851	0.973202	0.997199	0.846678	1.17448	33.2304	0.00157342	0.078542	0.0590885
CD20 on unswitched memory B cell || id:ebi-a-GCST90001760	Crohn's disease	MR Egger	14	-0.449519	0.22681	0.070865	0.637935	0.40899	0.995041	24.3929	0.0179768	NA	NA
CD20 on unswitched memory B cell || id:ebi-a-GCST90001760	Crohn's disease	Weighted median	14	0.0132109	0.0757716	0.86159	1.0133	0.873452	1.17553	NA	NA	NA	NA
CD20 on switched memory B cell || id:ebi-a-GCST90001761	Crohn's disease	Inverse variance weighted	24	-0.0465254	0.0370636	0.209375	0.95454	0.887657	1.02646	20.7447	0.596676	-0.0243623	0.256633
CD20 on switched memory B cell || id:ebi-a-GCST90001761	Crohn's disease	MR Egger	24	0.0691961	0.106049	0.520843	1.07165	0.870524	1.31923	19.3883	0.621247	NA	NA
CD20 on switched memory B cell || id:ebi-a-GCST90001761	Crohn's disease	Weighted median	24	-0.013788	0.0560475	0.805677	0.986307	0.883697	1.10083	NA	NA	NA	NA
CD20 on IgD+ B cell || id:ebi-a-GCST90001762	Crohn's disease	Inverse variance weighted	15	-0.00362807	0.050636	0.942881	0.996379	0.90224	1.10034	20.4651	0.116147	-0.0111926	0.763919
CD20 on IgD+ B cell || id:ebi-a-GCST90001762	Crohn's disease	MR Egger	15	0.056447	0.202744	0.785073	1.05807	0.711107	1.57432	20.318	0.0875587	NA	NA
CD20 on IgD+ B cell || id:ebi-a-GCST90001762	Crohn's disease	Weighted median	15	-0.00608402	0.0629581	0.923015	0.993934	0.87855	1.12447	NA	NA	NA	NA
CD20 on transitional B cell || id:ebi-a-GCST90001763	Crohn's disease	Inverse variance weighted	19	0.0658411	0.042764	0.123648	1.06806	0.982184	1.16144	10.7848	0.903265	-0.0397798	0.132014
CD20 on transitional B cell || id:ebi-a-GCST90001763	Crohn's disease	MR Egger	19	0.278542	0.141066	0.0647918	1.3212	1.00205	1.742	8.28121	0.960158	NA	NA
CD20 on transitional B cell || id:ebi-a-GCST90001763	Crohn's disease	Weighted median	19	0.0814641	0.0596415	0.171972	1.08487	0.965187	1.2194	NA	NA	NA	NA
CD24 on CD24+ CD27+ B cell || id:ebi-a-GCST90001764	Crohn's disease	Inverse variance weighted	2	0.0557164	0.204219	0.784986	1.0573	0.708537	1.57773	2.14648	0.142897	NA	NA
CD24 on IgD+ CD24+ B cell || id:ebi-a-GCST90001765	Crohn's disease	Inverse variance weighted	16	0.023917	0.0472935	0.613057	1.02421	0.933534	1.12368	23.332	0.0773411	0.00961592	0.590313
CD24 on IgD+ CD24+ B cell || id:ebi-a-GCST90001765	Crohn's disease	MR Egger	16	-0.017565	0.0895164	0.847257	0.982588	0.824468	1.17103	22.8367	0.0629788	NA	NA
CD24 on IgD+ CD24+ B cell || id:ebi-a-GCST90001765	Crohn's disease	Weighted median	16	-0.0218418	0.0532459	0.681654	0.978395	0.881435	1.08602	NA	NA	NA	NA
CD24 on IgD+ CD38- B cell || id:ebi-a-GCST90001766	Crohn's disease	Inverse variance weighted	17	-0.0498073	0.0437186	0.25459	0.951413	0.873283	1.03653	14.1119	0.590381	0.00790677	0.713651
CD24 on IgD+ CD38- B cell || id:ebi-a-GCST90001766	Crohn's disease	MR Egger	17	-0.088751	0.112937	0.444197	0.915073	0.733367	1.1418	13.972	0.527654	NA	NA
CD24 on IgD+ CD38- B cell || id:ebi-a-GCST90001766	Crohn's disease	Weighted median	17	-0.0330359	0.0589811	0.575404	0.967504	0.86188	1.08607	NA	NA	NA	NA
CD24 on IgD+ CD38- unswitched memory B cell || id:ebi-a-GCST90001767	Crohn's disease	Inverse variance weighted	17	0.0282054	0.0405169	0.486342	1.02861	0.950081	1.11362	27.3815	0.0374326	0.0368015	0.214955
CD24 on IgD+ CD38- unswitched memory B cell || id:ebi-a-GCST90001767	Crohn's disease	MR Egger	17	-0.0753122	0.0892551	0.412044	0.927454	0.778604	1.10476	24.6287	0.0551577	NA	NA
CD24 on IgD+ CD38- unswitched memory B cell || id:ebi-a-GCST90001767	Crohn's disease	Weighted median	17	0.000496431	0.0424532	0.99067	1.0005	0.920616	1.08731	NA	NA	NA	NA
CD24 on IgD+ CD38+ B cell || id:ebi-a-GCST90001768	Crohn's disease	Inverse variance weighted	17	-0.0718196	0.0535686	0.180017	0.930699	0.837936	1.03373	20.0837	0.216475	0.022101	0.466892
CD24 on IgD+ CD38+ B cell || id:ebi-a-GCST90001768	Crohn's disease	MR Egger	17	-0.188313	0.165234	0.272295	0.828355	0.599192	1.14516	19.3642	0.1977	NA	NA
CD24 on IgD+ CD38+ B cell || id:ebi-a-GCST90001768	Crohn's disease	Weighted median	17	-0.0411868	0.0687577	0.549164	0.95965	0.838658	1.0981	NA	NA	NA	NA
CD24 on IgD- CD38- B cell || id:ebi-a-GCST90001769	Crohn's disease	Inverse variance weighted	18	-0.0397905	0.0436776	0.362293	0.960991	0.882145	1.04688	17.9463	0.392238	-0.0183021	0.364587
CD24 on IgD- CD38- B cell || id:ebi-a-GCST90001769	Crohn's disease	MR Egger	18	0.0478801	0.103674	0.650417	1.04904	0.856141	1.28541	17.0199	0.384311	NA	NA
CD24 on IgD- CD38- B cell || id:ebi-a-GCST90001769	Crohn's disease	Weighted median	18	-0.0323399	0.0610798	0.59648	0.968177	0.85894	1.09131	NA	NA	NA	NA
CD24 on IgD- CD38dim B cell || id:ebi-a-GCST90001770	Crohn's disease	Inverse variance weighted	4	-0.102483	0.101389	0.312115	0.902593	0.739926	1.10102	1.91868	0.589454	0.0297007	0.684327
CD24 on IgD- CD38dim B cell || id:ebi-a-GCST90001770	Crohn's disease	MR Egger	4	-0.308897	0.450287	0.563561	0.734256	0.303778	1.77476	1.69733	0.427987	NA	NA
CD24 on IgD- CD38dim B cell || id:ebi-a-GCST90001770	Crohn's disease	Weighted median	4	-0.133936	0.127184	0.2923	0.874646	0.681665	1.12226	NA	NA	NA	NA
CD24 on memory B cell || id:ebi-a-GCST90001771	Crohn's disease	Inverse variance weighted	20	0.0603306	0.0467078	0.196474	1.06219	0.969266	1.16402	31.1552	0.0388176	0.00928345	0.623969
CD24 on memory B cell || id:ebi-a-GCST90001771	Crohn's disease	MR Egger	20	0.0184177	0.0966043	0.850933	1.01859	0.842883	1.23092	30.7304	0.0309224	NA	NA
CD24 on memory B cell || id:ebi-a-GCST90001771	Crohn's disease	Weighted median	20	0.0436052	0.0553488	0.430799	1.04457	0.937181	1.16426	NA	NA	NA	NA
CD24 on unswitched memory B cell || id:ebi-a-GCST90001772	Crohn's disease	Inverse variance weighted	17	-0.00788585	0.0403222	0.844946	0.992145	0.916753	1.07374	15.5843	0.482333	-0.00672214	0.694423
CD24 on unswitched memory B cell || id:ebi-a-GCST90001772	Crohn's disease	MR Egger	17	0.0201886	0.0811463	0.806896	1.02039	0.870351	1.1963	15.4194	0.421652	NA	NA
CD24 on unswitched memory B cell || id:ebi-a-GCST90001772	Crohn's disease	Weighted median	17	-0.0187058	0.0564141	0.740207	0.981468	0.87873	1.09622	NA	NA	NA	NA
CD24 on switched memory B cell || id:ebi-a-GCST90001773	Crohn's disease	Inverse variance weighted	22	0.0263867	0.0427666	0.53724	1.02674	0.944182	1.11651	29.848	0.0950861	-0.00826439	0.62033
CD24 on switched memory B cell || id:ebi-a-GCST90001773	Crohn's disease	MR Egger	22	0.0661863	0.0902912	0.472044	1.06843	0.895132	1.27527	29.4748	0.0788223	NA	NA
CD24 on switched memory B cell || id:ebi-a-GCST90001773	Crohn's disease	Weighted median	22	0.0305801	0.0534439	0.567193	1.03105	0.928514	1.14491	NA	NA	NA	NA
CD24 on transitional B cell || id:ebi-a-GCST90001774	Crohn's disease	Inverse variance weighted	14	-0.0410065	0.052906	0.438291	0.959823	0.86528	1.0647	12.1608	0.514505	0.0245831	0.450645
CD24 on transitional B cell || id:ebi-a-GCST90001774	Crohn's disease	MR Egger	14	-0.154115	0.154405	0.337921	0.857173	0.633339	1.16011	11.5528	0.48223	NA	NA
CD24 on transitional B cell || id:ebi-a-GCST90001774	Crohn's disease	Weighted median	14	-0.041958	0.0726801	0.563739	0.95891	0.831594	1.10572	NA	NA	NA	NA
CD25 on B cell || id:ebi-a-GCST90001775	Crohn's disease	Inverse variance weighted	14	-0.0877305	0.0490128	0.0734621	0.916008	0.832106	1.00837	9.55941	0.729504	0.0062898	0.764228
CD25 on B cell || id:ebi-a-GCST90001775	Crohn's disease	MR Egger	14	-0.119575	0.114776	0.318033	0.887297	0.708549	1.11114	9.46526	0.66276	NA	NA
CD25 on B cell || id:ebi-a-GCST90001775	Crohn's disease	Weighted median	14	-0.129052	0.0682144	0.0585102	0.878928	0.768933	1.00466	NA	NA	NA	NA
CD25 on CD20- CD38- B cell || id:ebi-a-GCST90001776	Crohn's disease	Inverse variance weighted	13	0.00717492	0.0746807	0.923461	1.0072	0.870055	1.16597	22.2735	0.0345661	-0.0129359	0.706148
CD25 on CD20- CD38- B cell || id:ebi-a-GCST90001776	Crohn's disease	MR Egger	13	0.0786686	0.200332	0.702051	1.08185	0.730532	1.60211	21.9744	0.0245726	NA	NA
CD25 on CD20- CD38- B cell || id:ebi-a-GCST90001776	Crohn's disease	Weighted median	13	-0.0256221	0.0852443	0.76374	0.974703	0.824729	1.15195	NA	NA	NA	NA
CD25 on CD24+ CD27+ B cell || id:ebi-a-GCST90001777	Crohn's disease	Inverse variance weighted	21	-0.057167	0.0407775	0.160937	0.944436	0.871891	1.02302	26.7536	0.14234	-0.0162622	0.44207
CD25 on CD24+ CD27+ B cell || id:ebi-a-GCST90001777	Crohn's disease	MR Egger	21	0.0198629	0.106403	0.853894	1.02006	0.828046	1.2566	25.9129	0.132634	NA	NA
CD25 on CD24+ CD27+ B cell || id:ebi-a-GCST90001777	Crohn's disease	Weighted median	21	0.0109577	0.0539135	0.838942	1.01102	0.909634	1.1237	NA	NA	NA	NA
CD25 on IgD+ CD24+ B cell || id:ebi-a-GCST90001778	Crohn's disease	Inverse variance weighted	17	-0.0527234	0.0498763	0.290474	0.948642	0.860294	1.04606	24.6529	0.0761835	-0.0140243	0.604126
CD25 on IgD+ CD24+ B cell || id:ebi-a-GCST90001778	Crohn's disease	MR Egger	17	0.0148756	0.137462	0.915259	1.01499	0.775265	1.32883	24.2003	0.0617689	NA	NA
CD25 on IgD+ CD24+ B cell || id:ebi-a-GCST90001778	Crohn's disease	Weighted median	17	0.00538046	0.0601457	0.928719	1.00539	0.893593	1.13119	NA	NA	NA	NA
CD25 on IgD+ CD24- B cell || id:ebi-a-GCST90001779	Crohn's disease	Inverse variance weighted	14	0.0175897	0.0496699	0.72324	1.01775	0.923335	1.12181	15.9716	0.250667	0.0205094	0.403037
CD25 on IgD+ CD24- B cell || id:ebi-a-GCST90001779	Crohn's disease	MR Egger	14	-0.0648859	0.107555	0.557552	0.937174	0.759045	1.15711	15.0304	0.239776	NA	NA
CD25 on IgD+ CD24- B cell || id:ebi-a-GCST90001779	Crohn's disease	Weighted median	14	-0.00759039	0.0636806	0.905121	0.992438	0.875987	1.12437	NA	NA	NA	NA
CD25 on IgD+ CD38- B cell || id:ebi-a-GCST90001780	Crohn's disease	Inverse variance weighted	15	-0.0221875	0.0478392	0.642797	0.978057	0.890518	1.0742	11.5911	0.639106	0.00929995	0.710065
CD25 on IgD+ CD38- B cell || id:ebi-a-GCST90001780	Crohn's disease	MR Egger	15	-0.0680399	0.129795	0.608955	0.934223	0.724381	1.20485	11.4467	0.573454	NA	NA
CD25 on IgD+ CD38- B cell || id:ebi-a-GCST90001780	Crohn's disease	Weighted median	15	-0.083237	0.0708582	0.240115	0.920133	0.80082	1.05722	NA	NA	NA	NA
CD25 on IgD+ CD38- naive B cell || id:ebi-a-GCST90001781	Crohn's disease	Inverse variance weighted	19	-0.0137067	0.0423809	0.74638	0.986387	0.907762	1.07182	25.6493	0.108052	0.0382013	0.194851
CD25 on IgD+ CD38- naive B cell || id:ebi-a-GCST90001781	Crohn's disease	MR Egger	19	-0.172368	0.124656	0.184635	0.841669	0.659223	1.07461	23.1672	0.143887	NA	NA
CD25 on IgD+ CD38- naive B cell || id:ebi-a-GCST90001781	Crohn's disease	Weighted median	19	-0.0257001	0.0522434	0.622769	0.974627	0.879768	1.07971	NA	NA	NA	NA
CD25 on IgD+ CD38- unswitched memory B cell || id:ebi-a-GCST90001782	Crohn's disease	Inverse variance weighted	15	-0.0482037	0.0387845	0.213919	0.95294	0.883184	1.0282	17.9764	0.207859	-0.0145728	0.642154
CD25 on IgD+ CD38- unswitched memory B cell || id:ebi-a-GCST90001782	Crohn's disease	MR Egger	15	0.0049195	0.118579	0.967538	1.00493	0.796525	1.26787	17.6688	0.170506	NA	NA
CD25 on IgD+ CD38- unswitched memory B cell || id:ebi-a-GCST90001782	Crohn's disease	Weighted median	15	-0.0226676	0.0507929	0.655398	0.977587	0.884952	1.07992	NA	NA	NA	NA
CD25 on IgD+ CD38+ B cell || id:ebi-a-GCST90001783	Crohn's disease	Inverse variance weighted	12	0.0865944	0.0548366	0.114305	1.09045	0.979331	1.21419	10.3036	0.503301	0.021281	0.48382
CD25 on IgD+ CD38+ B cell || id:ebi-a-GCST90001783	Crohn's disease	MR Egger	12	-0.0350357	0.176033	0.846229	0.965571	0.68382	1.36341	9.7749	0.460459	NA	NA
CD25 on IgD+ CD38+ B cell || id:ebi-a-GCST90001783	Crohn's disease	Weighted median	12	0.0895149	0.0745391	0.229786	1.09364	0.944989	1.26568	NA	NA	NA	NA
CD25 on IgD+ CD38dim B cell || id:ebi-a-GCST90001784	Crohn's disease	Inverse variance weighted	13	-0.0322858	0.0500332	0.518741	0.96823	0.877787	1.06799	10.5101	0.571299	0.00159695	0.937515
CD25 on IgD+ CD38dim B cell || id:ebi-a-GCST90001784	Crohn's disease	MR Egger	13	-0.039544	0.103405	0.709437	0.961228	0.784885	1.17719	10.5037	0.485727	NA	NA
CD25 on IgD+ CD38dim B cell || id:ebi-a-GCST90001784	Crohn's disease	Weighted median	13	-0.0370018	0.068946	0.59149	0.963674	0.841865	1.10311	NA	NA	NA	NA
CD25 on IgD- CD24- B cell || id:ebi-a-GCST90001785	Crohn's disease	Inverse variance weighted	22	-0.0632891	0.0572196	0.268695	0.938672	0.839088	1.05007	34.6339	0.0309588	0.0125869	0.657133
CD25 on IgD- CD24- B cell || id:ebi-a-GCST90001785	Crohn's disease	MR Egger	22	-0.14177	0.183685	0.44925	0.86782	0.605444	1.2439	34.2859	0.0242548	NA	NA
CD25 on IgD- CD24- B cell || id:ebi-a-GCST90001785	Crohn's disease	Weighted median	22	-0.093652	0.062222	0.132292	0.9106	0.806052	1.02871	NA	NA	NA	NA
CD25 on IgD- CD27- B cell || id:ebi-a-GCST90001786	Crohn's disease	Inverse variance weighted	15	-0.0426821	0.0850428	0.615745	0.958216	0.811098	1.13202	41.4767	0.000149613	0.0524222	0.234603
CD25 on IgD- CD27- B cell || id:ebi-a-GCST90001786	Crohn's disease	MR Egger	15	-0.358817	0.266997	0.201967	0.698502	0.4139	1.1788	37.0491	0.000407025	NA	NA
CD25 on IgD- CD27- B cell || id:ebi-a-GCST90001786	Crohn's disease	Weighted median	15	-0.0110197	0.081683	0.892685	0.989041	0.842722	1.16076	NA	NA	NA	NA
CD25 on IgD- CD38- B cell || id:ebi-a-GCST90001787	Crohn's disease	Inverse variance weighted	12	-0.110069	0.0475361	0.0205865	0.895772	0.816082	0.983244	7.11131	0.789999	0.0250373	0.264315
CD25 on IgD- CD38- B cell || id:ebi-a-GCST90001787	Crohn's disease	MR Egger	12	-0.241142	0.120596	0.0734398	0.78573	0.620326	0.995239	5.71272	0.838794	NA	NA
CD25 on IgD- CD38- B cell || id:ebi-a-GCST90001787	Crohn's disease	Weighted median	12	-0.198852	0.062999	0.0015971	0.819671	0.724459	0.927396	NA	NA	NA	NA
CD25 on IgD- CD38+ B cell || id:ebi-a-GCST90001788	Crohn's disease	Inverse variance weighted	16	0.133563	0.0785695	0.0891442	1.14289	0.979774	1.33317	28.1211	0.0208229	0.0508572	0.357186
CD25 on IgD- CD38+ B cell || id:ebi-a-GCST90001788	Crohn's disease	MR Egger	16	-0.229575	0.389457	0.564936	0.794871	0.370496	1.70534	26.411	0.02294	NA	NA
CD25 on IgD- CD38+ B cell || id:ebi-a-GCST90001788	Crohn's disease	Weighted median	16	0.100052	0.084491	0.236346	1.10523	0.936552	1.30428	NA	NA	NA	NA
CD25 on IgD- CD38dim B cell || id:ebi-a-GCST90001789	Crohn's disease	Inverse variance weighted	16	-0.0503134	0.0503228	0.317401	0.950931	0.861616	1.04951	19.6345	0.186406	0.040134	0.0722538
CD25 on IgD- CD38dim B cell || id:ebi-a-GCST90001789	Crohn's disease	MR Egger	16	-0.252445	0.113781	0.0435461	0.776899	0.621602	0.970995	15.4605	0.347416	NA	NA
CD25 on IgD- CD38dim B cell || id:ebi-a-GCST90001789	Crohn's disease	Weighted median	16	-0.103138	0.0662094	0.11929	0.902002	0.792226	1.02699	NA	NA	NA	NA
CD25 on memory B cell || id:ebi-a-GCST90001790	Crohn's disease	Inverse variance weighted	18	-0.0305078	0.0404486	0.450707	0.969953	0.896025	1.04998	18.932	0.332448	-0.00616009	0.7451
CD25 on memory B cell || id:ebi-a-GCST90001790	Crohn's disease	MR Egger	18	-0.00103959	0.0982999	0.991693	0.998961	0.823899	1.21122	18.8034	0.278989	NA	NA
CD25 on memory B cell || id:ebi-a-GCST90001790	Crohn's disease	Weighted median	18	0.0112458	0.0571613	0.844033	1.01131	0.904123	1.1312	NA	NA	NA	NA
CD25 on naive-mature B cell || id:ebi-a-GCST90001791	Crohn's disease	Inverse variance weighted	17	0.0145961	0.0546927	0.789566	1.0147	0.911556	1.12952	24.7649	0.0740788	0.0147435	0.498403
CD25 on naive-mature B cell || id:ebi-a-GCST90001791	Crohn's disease	MR Egger	17	-0.057993	0.11848	0.631586	0.943657	0.748104	1.19033	23.9949	0.065181	NA	NA
CD25 on naive-mature B cell || id:ebi-a-GCST90001791	Crohn's disease	Weighted median	17	-0.0309504	0.0648673	0.633267	0.969524	0.853773	1.10097	NA	NA	NA	NA
CD25 on unswitched memory B cell || id:ebi-a-GCST90001792	Crohn's disease	Inverse variance weighted	17	-0.0340882	0.0385214	0.376202	0.966486	0.896201	1.04228	16.1511	0.442467	-0.0142279	0.463193
CD25 on unswitched memory B cell || id:ebi-a-GCST90001792	Crohn's disease	MR Egger	17	0.0325672	0.0967682	0.74112	1.0331	0.85462	1.24886	15.563	0.411672	NA	NA
CD25 on unswitched memory B cell || id:ebi-a-GCST90001792	Crohn's disease	Weighted median	17	0.00803326	0.0570497	0.888019	1.00807	0.90142	1.12733	NA	NA	NA	NA
CD25 on switched memory B cell || id:ebi-a-GCST90001793	Crohn's disease	Inverse variance weighted	17	-0.101242	0.0433071	0.0193994	0.903714	0.830171	0.983773	14.2285	0.581699	0.0164241	0.351484
CD25 on switched memory B cell || id:ebi-a-GCST90001793	Crohn's disease	MR Egger	17	-0.18921	0.101212	0.0812102	0.827613	0.678694	1.00921	13.3037	0.57885	NA	NA
CD25 on switched memory B cell || id:ebi-a-GCST90001793	Crohn's disease	Weighted median	17	-0.0999419	0.0614575	0.103908	0.90489	0.802199	1.02073	NA	NA	NA	NA
CD25 on IgD+ B cell || id:ebi-a-GCST90001794	Crohn's disease	Inverse variance weighted	13	-0.0317214	0.0627468	0.613176	0.968776	0.856668	1.09556	16.7633	0.158721	0.0259671	0.33176
CD25 on IgD+ B cell || id:ebi-a-GCST90001794	Crohn's disease	MR Egger	13	-0.161659	0.142495	0.280706	0.850731	0.643425	1.12483	15.3269	0.168017	NA	NA
CD25 on IgD+ B cell || id:ebi-a-GCST90001794	Crohn's disease	Weighted median	13	-0.0521228	0.074519	0.484266	0.949212	0.820222	1.09849	NA	NA	NA	NA
CD25 on transitional B cell || id:ebi-a-GCST90001795	Crohn's disease	Inverse variance weighted	15	0.0445238	0.0504927	0.377892	1.04553	0.947014	1.15429	6.22037	0.960628	0.0356115	0.17979
CD25 on transitional B cell || id:ebi-a-GCST90001795	Crohn's disease	MR Egger	15	-0.155155	0.149621	0.318646	0.856282	0.638641	1.14809	4.21039	0.98874	NA	NA
CD25 on transitional B cell || id:ebi-a-GCST90001795	Crohn's disease	Weighted median	15	0.0403038	0.0647621	0.533721	1.04113	0.917016	1.18203	NA	NA	NA	NA
CD27 on CD20- B cell || id:ebi-a-GCST90001796	Crohn's disease	Inverse variance weighted	9	0.0444212	0.0690183	0.519826	1.04542	0.91315	1.19685	7.81156	0.452091	-0.0652955	0.227781
CD27 on CD20- B cell || id:ebi-a-GCST90001796	Crohn's disease	MR Egger	9	0.482595	0.338598	0.197105	1.62027	0.834388	3.14636	6.06431	0.532261	NA	NA
CD27 on CD20- B cell || id:ebi-a-GCST90001796	Crohn's disease	Weighted median	9	0.068293	0.0922546	0.459139	1.07068	0.893574	1.28289	NA	NA	NA	NA
CD27 on CD20- CD38- B cell || id:ebi-a-GCST90001797	Crohn's disease	Inverse variance weighted	13	0.121996	0.0677335	0.071684	1.12975	0.989296	1.29014	15.304	0.225229	0.0521613	0.3232
CD27 on CD20- CD38- B cell || id:ebi-a-GCST90001797	Crohn's disease	MR Egger	13	-0.256061	0.371707	0.50517	0.774094	0.373586	1.60398	13.9476	0.235907	NA	NA
CD27 on CD20- CD38- B cell || id:ebi-a-GCST90001797	Crohn's disease	Weighted median	13	0.116524	0.0859492	0.175183	1.12358	0.94939	1.32974	NA	NA	NA	NA
CD27 on CD24+ CD27+ B cell || id:ebi-a-GCST90001798	Crohn's disease	Inverse variance weighted	21	0.0994972	0.0315121	0.00159167	1.10462	1.03845	1.17499	22.3766	0.320432	-0.012219	0.493607
CD27 on CD24+ CD27+ B cell || id:ebi-a-GCST90001798	Crohn's disease	MR Egger	21	0.136674	0.0620938	0.0402925	1.14645	1.01508	1.29483	21.817	0.293456	NA	NA
CD27 on CD24+ CD27+ B cell || id:ebi-a-GCST90001798	Crohn's disease	Weighted median	21	0.111629	0.0408198	0.00624412	1.1181	1.03213	1.21123	NA	NA	NA	NA
CD27 on T cell || id:ebi-a-GCST90001799	Crohn's disease	Inverse variance weighted	15	0.0883668	0.0464548	0.0571437	1.09239	0.997319	1.19652	17.3092	0.240077	-0.0408887	0.221042
CD27 on T cell || id:ebi-a-GCST90001799	Crohn's disease	MR Egger	15	0.245266	0.130225	0.0822099	1.27796	0.990074	1.64956	15.357	0.285599	NA	NA
CD27 on T cell || id:ebi-a-GCST90001799	Crohn's disease	Weighted median	15	0.125077	0.0579866	0.0310061	1.13324	1.01149	1.26964	NA	NA	NA	NA
CD27 on IgD+ CD24+ B cell || id:ebi-a-GCST90001800	Crohn's disease	Inverse variance weighted	24	0.0880079	0.0378823	0.0201689	1.092	1.01385	1.17616	34.938	0.0527572	-0.0198637	0.214357
CD27 on IgD+ CD24+ B cell || id:ebi-a-GCST90001800	Crohn's disease	MR Egger	24	0.169204	0.0736829	0.0315491	1.18436	1.0251	1.36837	32.5213	0.0689326	NA	NA
CD27 on IgD+ CD24+ B cell || id:ebi-a-GCST90001800	Crohn's disease	Weighted median	24	0.158537	0.0435854	0.000275412	1.1718	1.07585	1.2763	NA	NA	NA	NA
CD27 on IgD+ CD38- unswitched memory B cell || id:ebi-a-GCST90001801	Crohn's disease	Inverse variance weighted	16	0.0814191	0.0284003	0.00414588	1.08483	1.02609	1.14692	11.5233	0.714695	-0.0295022	0.140406
CD27 on IgD+ CD38- unswitched memory B cell || id:ebi-a-GCST90001801	Crohn's disease	MR Egger	16	0.160759	0.0581703	0.015233	1.1744	1.04785	1.31623	9.08082	0.825839	NA	NA
CD27 on IgD+ CD38- unswitched memory B cell || id:ebi-a-GCST90001801	Crohn's disease	Weighted median	16	0.0597538	0.0389748	0.125241	1.06158	0.983501	1.14585	NA	NA	NA	NA
CD27 on IgD- CD38- B cell || id:ebi-a-GCST90001802	Crohn's disease	Inverse variance weighted	24	0.0619286	0.0400381	0.121926	1.06389	0.98359	1.15074	46.5614	0.00254523	-0.0352249	0.0453033
CD27 on IgD- CD38- B cell || id:ebi-a-GCST90001802	Crohn's disease	MR Egger	24	0.197086	0.073801	0.0139716	1.21785	1.05384	1.40739	38.6483	0.0154787	NA	NA
CD27 on IgD- CD38- B cell || id:ebi-a-GCST90001802	Crohn's disease	Weighted median	24	0.0876638	0.0449893	0.0513495	1.09162	0.999485	1.19225	NA	NA	NA	NA
CD27 on IgD- CD38+ B cell || id:ebi-a-GCST90001803	Crohn's disease	Inverse variance weighted	13	0.160251	0.0771493	0.0377867	1.17381	1.00908	1.36542	21.9645	0.03792	-0.0330484	0.582609
CD27 on IgD- CD38+ B cell || id:ebi-a-GCST90001803	Crohn's disease	MR Egger	13	0.373063	0.384145	0.352344	1.45218	0.683956	3.08326	21.3424	0.0299922	NA	NA
CD27 on IgD- CD38+ B cell || id:ebi-a-GCST90001803	Crohn's disease	Weighted median	13	0.124305	0.0852687	0.144894	1.13236	0.958082	1.33834	NA	NA	NA	NA
CD27 on IgD- CD38dim B cell || id:ebi-a-GCST90001804	Crohn's disease	Inverse variance weighted	21	0.0791061	0.0445518	0.0757994	1.08232	0.991818	1.18108	52.2982	0.000102998	-0.023217	0.229895
CD27 on IgD- CD38dim B cell || id:ebi-a-GCST90001804	Crohn's disease	MR Egger	21	0.159107	0.0780511	0.0556624	1.17246	1.00615	1.36627	48.3799	0.000226016	NA	NA
CD27 on IgD- CD38dim B cell || id:ebi-a-GCST90001804	Crohn's disease	Weighted median	21	0.135456	0.038134	0.000382153	1.14506	1.06259	1.23392	NA	NA	NA	NA
CD27 on memory B cell || id:ebi-a-GCST90001805	Crohn's disease	Inverse variance weighted	18	0.0681608	0.0493228	0.166992	1.07054	0.971891	1.1792	36.4616	0.003978	-0.0469053	0.0443628
CD27 on memory B cell || id:ebi-a-GCST90001805	Crohn's disease	MR Egger	18	0.228918	0.0861374	0.0172009	1.25724	1.06193	1.48847	28.0996	0.030764	NA	NA
CD27 on memory B cell || id:ebi-a-GCST90001805	Crohn's disease	Weighted median	18	0.170557	0.047594	0.000338916	1.18597	1.08034	1.30192	NA	NA	NA	NA
CD27 on unswitched memory B cell || id:ebi-a-GCST90001806	Crohn's disease	Inverse variance weighted	23	0.074496	0.0347075	0.0318414	1.07734	1.00649	1.15318	26.3378	0.237461	-0.0202201	0.23707
CD27 on unswitched memory B cell || id:ebi-a-GCST90001806	Crohn's disease	MR Egger	23	0.151262	0.0718122	0.0473771	1.1633	1.01057	1.33912	24.6024	0.264796	NA	NA
CD27 on unswitched memory B cell || id:ebi-a-GCST90001806	Crohn's disease	Weighted median	23	0.0828189	0.0444306	0.0623211	1.08635	0.995744	1.18519	NA	NA	NA	NA
CD27 on Plasma Blast-Plasma Cell || id:ebi-a-GCST90001807	Crohn's disease	Inverse variance weighted	14	0.155412	0.0625276	0.0129375	1.16814	1.0334	1.32044	13.6183	0.401261	0.0329792	0.533817
CD27 on Plasma Blast-Plasma Cell || id:ebi-a-GCST90001807	Crohn's disease	MR Egger	14	-0.0571935	0.337992	0.868446	0.944411	0.486919	1.83175	13.168	0.356949	NA	NA
CD27 on Plasma Blast-Plasma Cell || id:ebi-a-GCST90001807	Crohn's disease	Weighted median	14	0.20049	0.0860464	0.0198048	1.222	1.03235	1.44649	NA	NA	NA	NA
CD27 on switched memory B cell || id:ebi-a-GCST90001808	Crohn's disease	Inverse variance weighted	22	0.0962034	0.0258388	0.000196701	1.10098	1.04661	1.15818	20.083	0.516011	-0.0096858	0.531347
CD27 on switched memory B cell || id:ebi-a-GCST90001808	Crohn's disease	MR Egger	22	0.123741	0.0503628	0.0232699	1.13172	1.02535	1.24914	19.6772	0.478278	NA	NA
CD27 on switched memory B cell || id:ebi-a-GCST90001808	Crohn's disease	Weighted median	22	0.138936	0.0355691	9.38e-05	1.14905	1.07167	1.23201	NA	NA	NA	NA
CD38 on CD20- B cell || id:ebi-a-GCST90001809	Crohn's disease	Inverse variance weighted	14	0.0817291	0.0732695	0.264654	1.08516	0.939996	1.25275	20.1976	0.0903926	0.00571459	0.904282
CD38 on CD20- B cell || id:ebi-a-GCST90001809	Crohn's disease	MR Egger	14	0.0428794	0.325365	0.897335	1.04381	0.551653	1.97505	20.1722	0.0638979	NA	NA
CD38 on CD20- B cell || id:ebi-a-GCST90001809	Crohn's disease	Weighted median	14	0.0580397	0.0854967	0.497231	1.05976	0.896252	1.25309	NA	NA	NA	NA
CD38 on CD3- CD19- || id:ebi-a-GCST90001810	Crohn's disease	Inverse variance weighted	12	-0.0232556	0.0445853	0.601951	0.977013	0.895259	1.06623	7.8975	0.722455	0.0303072	0.324514
CD38 on CD3- CD19- || id:ebi-a-GCST90001810	Crohn's disease	MR Egger	12	-0.152926	0.132845	0.276447	0.858193	0.661463	1.11344	6.82378	0.74197	NA	NA
CD38 on CD3- CD19- || id:ebi-a-GCST90001810	Crohn's disease	Weighted median	12	-0.0242847	0.0612272	0.691639	0.976008	0.865637	1.10045	NA	NA	NA	NA
CD38 on IgD+ CD24- B cell || id:ebi-a-GCST90001811	Crohn's disease	Inverse variance weighted	8	0.0648717	0.0623201	0.297902	1.06702	0.944334	1.20565	1.66327	0.976114	-0.00402938	0.888668
CD38 on IgD+ CD24- B cell || id:ebi-a-GCST90001811	Crohn's disease	MR Egger	8	0.0881822	0.171345	0.625201	1.09219	0.78063	1.52809	1.64194	0.949515	NA	NA
CD38 on IgD+ CD24- B cell || id:ebi-a-GCST90001811	Crohn's disease	Weighted median	8	0.031472	0.0816626	0.699948	1.03197	0.879337	1.2111	NA	NA	NA	NA
CD38 on IgD+ CD38+ B cell || id:ebi-a-GCST90001812	Crohn's disease	Inverse variance weighted	7	0.15338	0.106127	0.148389	1.16577	0.946836	1.43532	12.9219	0.0442931	0.00905896	0.879484
CD38 on IgD+ CD38+ B cell || id:ebi-a-GCST90001812	Crohn's disease	MR Egger	7	0.112579	0.280797	0.705034	1.11916	0.645466	1.94049	12.8564	0.0247618	NA	NA
CD38 on IgD+ CD38+ B cell || id:ebi-a-GCST90001812	Crohn's disease	Weighted median	7	0.0891765	0.100619	0.375466	1.09327	0.897595	1.33161	NA	NA	NA	NA
CD38 on IgD+ CD38dim B cell || id:ebi-a-GCST90001813	Crohn's disease	Inverse variance weighted	11	0.0263741	0.0702596	0.707378	1.02672	0.894639	1.17831	14.6753	0.144357	-0.0133544	0.71661
CD38 on IgD+ CD38dim B cell || id:ebi-a-GCST90001813	Crohn's disease	MR Egger	11	0.0964314	0.200925	0.642722	1.10123	0.74276	1.63272	14.4499	0.107196	NA	NA
CD38 on IgD+ CD38dim B cell || id:ebi-a-GCST90001813	Crohn's disease	Weighted median	11	0.0642964	0.0865909	0.457766	1.06641	0.899945	1.26366	NA	NA	NA	NA
CD38 on IgD- CD38+ B cell || id:ebi-a-GCST90001814	Crohn's disease	Inverse variance weighted	8	0.0449633	0.0861069	0.601545	1.04599	0.883551	1.23829	8.01738	0.331064	-0.00379601	0.957989
CD38 on IgD- CD38+ B cell || id:ebi-a-GCST90001814	Crohn's disease	MR Egger	8	0.0725546	0.510968	0.891732	1.07525	0.394971	2.92722	8.01336	0.237126	NA	NA
CD38 on IgD- CD38+ B cell || id:ebi-a-GCST90001814	Crohn's disease	Weighted median	8	-0.0224005	0.11294	0.84278	0.977849	0.783673	1.22014	NA	NA	NA	NA
CD38 on IgD- CD38dim B cell || id:ebi-a-GCST90001815	Crohn's disease	Inverse variance weighted	9	0.114614	0.086788	0.186628	1.12144	0.946021	1.32939	11.9444	0.153703	-0.018501	0.626932
CD38 on IgD- CD38dim B cell || id:ebi-a-GCST90001815	Crohn's disease	MR Egger	9	0.214306	0.216294	0.354785	1.239	0.810884	1.89315	11.5194	0.117514	NA	NA
CD38 on IgD- CD38dim B cell || id:ebi-a-GCST90001815	Crohn's disease	Weighted median	9	0.0742661	0.0944629	0.431754	1.07709	0.895045	1.29617	NA	NA	NA	NA
CD38 on naive-mature B cell || id:ebi-a-GCST90001816	Crohn's disease	Inverse variance weighted	16	0.0354195	0.0461463	0.442757	1.03605	0.946459	1.13413	12.7649	0.620454	0.00226035	0.926613
CD38 on naive-mature B cell || id:ebi-a-GCST90001816	Crohn's disease	MR Egger	16	0.0221044	0.149293	0.884407	1.02235	0.76299	1.36987	12.7561	0.545815	NA	NA
CD38 on naive-mature B cell || id:ebi-a-GCST90001816	Crohn's disease	Weighted median	16	0.01942	0.0620539	0.754316	1.01961	0.902844	1.15148	NA	NA	NA	NA
CD38 on Plasma Blast-Plasma Cell || id:ebi-a-GCST90001817	Crohn's disease	Inverse variance weighted	12	0.00263922	0.0768412	0.972601	1.00264	0.862457	1.16561	16.0413	0.139606	0.0511516	0.328696
CD38 on Plasma Blast-Plasma Cell || id:ebi-a-GCST90001817	Crohn's disease	MR Egger	12	-0.370182	0.371081	0.342012	0.690609	0.333704	1.42923	14.5112	0.150924	NA	NA
CD38 on Plasma Blast-Plasma Cell || id:ebi-a-GCST90001817	Crohn's disease	Weighted median	12	-0.0316784	0.0933166	0.734254	0.968818	0.806881	1.16325	NA	NA	NA	NA
CD38 on IgD+ B cell || id:ebi-a-GCST90001818	Crohn's disease	Inverse variance weighted	11	-0.00864036	0.0807711	0.91481	0.991397	0.84624	1.16145	12.6674	0.242864	0.0359628	0.378136
CD38 on IgD+ B cell || id:ebi-a-GCST90001818	Crohn's disease	MR Egger	11	-0.25017	0.272964	0.383309	0.778668	0.456037	1.32955	11.5635	0.239053	NA	NA
CD38 on IgD+ B cell || id:ebi-a-GCST90001818	Crohn's disease	Weighted median	11	0.0497603	0.0965918	0.606441	1.05102	0.869741	1.27008	NA	NA	NA	NA
CD38 on transitional B cell || id:ebi-a-GCST90001819	Crohn's disease	Inverse variance weighted	12	-0.0508269	0.0638766	0.426203	0.950443	0.838597	1.07721	16.1215	0.13668	-0.0489791	0.125117
CD38 on transitional B cell || id:ebi-a-GCST90001819	Crohn's disease	MR Egger	12	0.178162	0.149073	0.25961	1.19502	0.892238	1.60055	12.5934	0.247301	NA	NA
CD38 on transitional B cell || id:ebi-a-GCST90001819	Crohn's disease	Weighted median	12	0.0420626	0.0740452	0.56999	1.04296	0.902067	1.20586	NA	NA	NA	NA
IgD on IgD+ CD24+ B cell || id:ebi-a-GCST90001820	Crohn's disease	Inverse variance weighted	18	-0.0268765	0.0520767	0.605788	0.973481	0.879021	1.07809	31.8957	0.0155033	-0.0140646	0.544456
IgD on IgD+ CD24+ B cell || id:ebi-a-GCST90001820	Crohn's disease	MR Egger	18	0.0290552	0.104745	0.785033	1.02948	0.838413	1.26409	31.1491	0.0128783	NA	NA
IgD on IgD+ CD24+ B cell || id:ebi-a-GCST90001820	Crohn's disease	Weighted median	18	0.0382193	0.0535326	0.475262	1.03896	0.935471	1.1539	NA	NA	NA	NA
IgD on IgD+ CD24- B cell || id:ebi-a-GCST90001821	Crohn's disease	Inverse variance weighted	23	-0.00140879	0.0412121	0.97273	0.998592	0.921102	1.0826	32.5642	0.0682722	-0.0133443	0.398696
IgD on IgD+ CD24- B cell || id:ebi-a-GCST90001821	Crohn's disease	MR Egger	23	0.0582533	0.0807137	0.478422	1.05998	0.904887	1.24166	31.4527	0.0664475	NA	NA
IgD on IgD+ CD24- B cell || id:ebi-a-GCST90001821	Crohn's disease	Weighted median	23	0.0371102	0.0492521	0.451166	1.03781	0.942307	1.14299	NA	NA	NA	NA
IgD on IgD+ CD38- B cell || id:ebi-a-GCST90001822	Crohn's disease	Inverse variance weighted	19	0.0229029	0.0397381	0.56438	1.02317	0.946501	1.10604	14.8602	0.67154	-0.0143687	0.400313
IgD on IgD+ CD38- B cell || id:ebi-a-GCST90001822	Crohn's disease	MR Egger	19	0.092977	0.0904264	0.318261	1.09744	0.919193	1.31024	14.116	0.658874	NA	NA
IgD on IgD+ CD38- B cell || id:ebi-a-GCST90001822	Crohn's disease	Weighted median	19	0.0340809	0.057324	0.552156	1.03467	0.924711	1.1577	NA	NA	NA	NA
IgD on IgD+ CD38- unswitched memory B cell || id:ebi-a-GCST90001823	Crohn's disease	Inverse variance weighted	14	-0.00404648	0.0478739	0.93264	0.995962	0.906758	1.09394	22.3242	0.0505383	-0.0235534	0.39457
IgD on IgD+ CD38- unswitched memory B cell || id:ebi-a-GCST90001823	Crohn's disease	MR Egger	14	0.0687682	0.0955574	0.485519	1.07119	0.88823	1.29183	20.9621	0.0509382	NA	NA
IgD on IgD+ CD38- unswitched memory B cell || id:ebi-a-GCST90001823	Crohn's disease	Weighted median	14	0.0396716	0.0493436	0.421404	1.04047	0.944555	1.14612	NA	NA	NA	NA
IgD on IgD+ CD38+ B cell || id:ebi-a-GCST90001824	Crohn's disease	Inverse variance weighted	19	0.0333912	0.0332636	0.315458	1.03395	0.968695	1.10361	15.6531	0.616744	0.000568615	0.967911
IgD on IgD+ CD38+ B cell || id:ebi-a-GCST90001824	Crohn's disease	MR Egger	19	0.0311158	0.0649062	0.637766	1.0316	0.908373	1.17156	15.6514	0.548666	NA	NA
IgD on IgD+ CD38+ B cell || id:ebi-a-GCST90001824	Crohn's disease	Weighted median	19	0.0371627	0.0469567	0.428696	1.03786	0.946606	1.13792	NA	NA	NA	NA
IgD on IgD+ CD38dim B cell || id:ebi-a-GCST90001825	Crohn's disease	Inverse variance weighted	14	0.0353928	0.0472971	0.454274	1.03603	0.944302	1.13666	20.9763	0.0733982	0.0173479	0.463498
IgD on IgD+ CD38dim B cell || id:ebi-a-GCST90001825	Crohn's disease	MR Egger	14	-0.0306169	0.0995546	0.763705	0.969847	0.797922	1.17882	20.0196	0.0667157	NA	NA
IgD on IgD+ CD38dim B cell || id:ebi-a-GCST90001825	Crohn's disease	Weighted median	14	0.0281068	0.0516666	0.58644	1.02851	0.929452	1.13811	NA	NA	NA	NA
IgD on unswitched memory B cell || id:ebi-a-GCST90001826	Crohn's disease	Inverse variance weighted	13	-0.0612948	0.0499303	0.219595	0.940546	0.852861	1.03725	16.0623	0.1884	-0.043004	0.0569709
IgD on unswitched memory B cell || id:ebi-a-GCST90001826	Crohn's disease	MR Egger	13	0.0884724	0.0830063	0.309326	1.0925	0.928467	1.28552	11.3843	0.411648	NA	NA
IgD on unswitched memory B cell || id:ebi-a-GCST90001826	Crohn's disease	Weighted median	13	-0.0486137	0.0574382	0.397348	0.952549	0.851128	1.06606	NA	NA	NA	NA
IgD on IgD+ B cell || id:ebi-a-GCST90001827	Crohn's disease	Inverse variance weighted	16	0.0374614	0.0378183	0.321899	1.03817	0.964002	1.11805	13.8418	0.537558	-0.00172586	0.91024
IgD on IgD+ B cell || id:ebi-a-GCST90001827	Crohn's disease	MR Egger	16	0.0452533	0.0777023	0.569563	1.04629	0.898487	1.21841	13.8286	0.462554	NA	NA
IgD on IgD+ B cell || id:ebi-a-GCST90001827	Crohn's disease	Weighted median	16	0.0329351	0.053372	0.537178	1.03348	0.930834	1.14745	NA	NA	NA	NA
IgD on transitional B cell || id:ebi-a-GCST90001828	Crohn's disease	Inverse variance weighted	22	0.0434903	0.0356514	0.222511	1.04445	0.973959	1.12004	14.5346	0.845562	-0.000396307	0.977218
IgD on transitional B cell || id:ebi-a-GCST90001828	Crohn's disease	MR Egger	22	0.0454777	0.0774244	0.563521	1.04653	0.899178	1.21802	14.5337	0.802438	NA	NA
IgD on transitional B cell || id:ebi-a-GCST90001828	Crohn's disease	Weighted median	22	0.0467206	0.0530749	0.378709	1.04783	0.944305	1.1627	NA	NA	NA	NA
BAFF-R on B cell || id:ebi-a-GCST90001829	Crohn's disease	Inverse variance weighted	14	0.021688	0.0264151	0.411621	1.02192	0.970362	1.07623	8.47498	0.81134	0.0185116	0.188989
BAFF-R on B cell || id:ebi-a-GCST90001829	Crohn's disease	MR Egger	14	-0.0115967	0.0356226	0.750376	0.98847	0.921809	1.05995	6.53548	0.886725	NA	NA
BAFF-R on B cell || id:ebi-a-GCST90001829	Crohn's disease	Weighted median	14	0.00868928	0.0290483	0.764839	1.00873	0.9529	1.06783	NA	NA	NA	NA
BAFF-R on CD20- B cell || id:ebi-a-GCST90001830	Crohn's disease	Inverse variance weighted	7	0.0867385	0.0703816	0.217798	1.09061	0.95008	1.25193	4.81094	0.568281	0.0352156	0.366459
BAFF-R on CD20- B cell || id:ebi-a-GCST90001830	Crohn's disease	MR Egger	7	-0.0643495	0.167692	0.716949	0.937677	0.675012	1.30255	3.82559	0.574791	NA	NA
BAFF-R on CD20- B cell || id:ebi-a-GCST90001830	Crohn's disease	Weighted median	7	0.0402137	0.0896531	0.653758	1.04103	0.873274	1.24102	NA	NA	NA	NA
CD62L on CD62L+ myeloid Dendritic Cell || id:ebi-a-GCST90001831	Crohn's disease	Inverse variance weighted	13	-0.0106376	0.044682	0.811824	0.989419	0.906455	1.07998	9.6659	0.645245	0.00529895	0.826869
CD62L on CD62L+ myeloid Dendritic Cell || id:ebi-a-GCST90001831	Crohn's disease	MR Egger	13	-0.0368004	0.125057	0.774031	0.963868	0.75434	1.2316	9.61572	0.565248	NA	NA
CD62L on CD62L+ myeloid Dendritic Cell || id:ebi-a-GCST90001831	Crohn's disease	Weighted median	13	-0.0166336	0.0618485	0.787975	0.983504	0.871224	1.11025	NA	NA	NA	NA
CD62L on CD62L+ plasmacytoid Dendritic Cell || id:ebi-a-GCST90001832	Crohn's disease	Inverse variance weighted	10	-0.0547252	0.0698614	0.433428	0.946745	0.825593	1.08568	18.8126	0.0268343	-0.0149865	0.720423
CD62L on CD62L+ plasmacytoid Dendritic Cell || id:ebi-a-GCST90001832	Crohn's disease	MR Egger	10	0.0203834	0.215479	0.926962	1.02059	0.669011	1.55694	18.4948	0.0178081	NA	NA
CD62L on CD62L+ plasmacytoid Dendritic Cell || id:ebi-a-GCST90001832	Crohn's disease	Weighted median	10	-0.0340533	0.0707562	0.63032	0.96652	0.84136	1.1103	NA	NA	NA	NA
CD62L on CD62L+ Dendritic Cell || id:ebi-a-GCST90001833	Crohn's disease	Inverse variance weighted	20	-0.0814254	0.0491855	0.0978282	0.921801	0.837086	1.01509	30.8747	0.041669	-0.0210933	0.47102
CD62L on CD62L+ Dendritic Cell || id:ebi-a-GCST90001833	Crohn's disease	MR Egger	20	0.0302926	0.159684	0.851664	1.03076	0.753755	1.40955	29.9719	0.0377203	NA	NA
CD62L on CD62L+ Dendritic Cell || id:ebi-a-GCST90001833	Crohn's disease	Weighted median	20	-0.0414288	0.0613055	0.499183	0.959418	0.850792	1.08191	NA	NA	NA	NA
CD62L on monocyte || id:ebi-a-GCST90001834	Crohn's disease	Inverse variance weighted	15	0.0231483	0.0374659	0.536675	1.02342	0.950958	1.1014	8.80686	0.843221	0.000147347	0.993805
CD62L on monocyte || id:ebi-a-GCST90001834	Crohn's disease	MR Egger	15	0.0225598	0.0832566	0.790671	1.02282	0.868817	1.20411	8.80679	0.787374	NA	NA
CD62L on monocyte || id:ebi-a-GCST90001834	Crohn's disease	Weighted median	15	0.0372264	0.0491512	0.44882	1.03793	0.942603	1.14289	NA	NA	NA	NA
CD62L on granulocyte || id:ebi-a-GCST90001835	Crohn's disease	Inverse variance weighted	13	-0.0507708	0.0883932	0.565714	0.950496	0.799298	1.1303	31.9724	0.00139744	0.00254487	0.960915
CD62L on granulocyte || id:ebi-a-GCST90001835	Crohn's disease	MR Egger	13	-0.0659161	0.315892	0.838522	0.936209	0.504058	1.73887	31.9651	0.000772635	NA	NA
CD62L on granulocyte || id:ebi-a-GCST90001835	Crohn's disease	Weighted median	13	-0.0394722	0.0801399	0.622337	0.961297	0.821563	1.1248	NA	NA	NA	NA
CD66b on CD66b++ myeloid cell || id:ebi-a-GCST90001836	Crohn's disease	Inverse variance weighted	20	0.00297422	0.0355467	0.933318	1.00298	0.935478	1.07535	21.2743	0.321845	0.0324684	0.242242
CD66b on CD66b++ myeloid cell || id:ebi-a-GCST90001836	Crohn's disease	MR Egger	20	-0.11932	0.107064	0.279736	0.887524	0.719525	1.09475	19.6761	0.35135	NA	NA
CD66b on CD66b++ myeloid cell || id:ebi-a-GCST90001836	Crohn's disease	Weighted median	20	-0.0113848	0.0466478	0.807185	0.98868	0.902294	1.08334	NA	NA	NA	NA
CD66b on Granulocytic Myeloid-Derived Suppressor Cells || id:ebi-a-GCST90001837	Crohn's disease	Inverse variance weighted	16	0.00506999	0.0296306	0.86414	1.00508	0.948374	1.06518	7.09546	0.954946	-0.0222091	0.344132
CD66b on Granulocytic Myeloid-Derived Suppressor Cells || id:ebi-a-GCST90001837	Crohn's disease	MR Egger	16	0.0919491	0.0935473	0.342331	1.09631	0.912649	1.31693	6.13676	0.962926	NA	NA
CD66b on Granulocytic Myeloid-Derived Suppressor Cells || id:ebi-a-GCST90001837	Crohn's disease	Weighted median	16	0.0336502	0.0387157	0.384759	1.03422	0.958647	1.11576	NA	NA	NA	NA
CD3 on naive CD8+ T cell || id:ebi-a-GCST90001838	Crohn's disease	Inverse variance weighted	19	0.0222502	0.0271442	0.412386	1.0225	0.969522	1.07837	8.90069	0.961999	-0.0223248	0.105568
CD3 on naive CD8+ T cell || id:ebi-a-GCST90001838	Crohn's disease	MR Egger	19	0.093091	0.0495405	0.0774884	1.09756	0.996	1.20948	5.97868	0.993328	NA	NA
CD3 on naive CD8+ T cell || id:ebi-a-GCST90001838	Crohn's disease	Weighted median	19	0.0625486	0.0350335	0.0741976	1.06455	0.993902	1.14021	NA	NA	NA	NA
CD3 on Effector Memory CD8+ T cell || id:ebi-a-GCST90001839	Crohn's disease	Inverse variance weighted	15	0.0630237	0.0477061	0.186474	1.06505	0.969979	1.16944	18.6236	0.179835	-0.0417301	0.0825196
CD3 on Effector Memory CD8+ T cell || id:ebi-a-GCST90001839	Crohn's disease	MR Egger	15	0.263699	0.115348	0.0396665	1.30174	1.03833	1.63196	14.6384	0.330465	NA	NA
CD3 on Effector Memory CD8+ T cell || id:ebi-a-GCST90001839	Crohn's disease	Weighted median	15	0.149711	0.0571774	0.00883551	1.1615	1.03836	1.29924	NA	NA	NA	NA
CD3 on Terminally Differentiated CD8+ T cell || id:ebi-a-GCST90001840	Crohn's disease	Inverse variance weighted	16	0.0343716	0.0487474	0.48075	1.03497	0.94066	1.13873	15.5824	0.410331	0.0234574	0.526054
CD3 on Terminally Differentiated CD8+ T cell || id:ebi-a-GCST90001840	Crohn's disease	MR Egger	16	-0.0846648	0.189691	0.662184	0.91882	0.633523	1.3326	15.1256	0.369622	NA	NA
CD3 on Terminally Differentiated CD8+ T cell || id:ebi-a-GCST90001840	Crohn's disease	Weighted median	16	0.0290559	0.0667066	0.663143	1.02948	0.90331	1.17328	NA	NA	NA	NA
CD3 on Central Memory CD4+ T cell || id:ebi-a-GCST90001841	Crohn's disease	Inverse variance weighted	19	0.0248958	0.0292716	0.395041	1.02521	0.968045	1.08575	10.8166	0.901978	-0.0240283	0.100649
CD3 on Central Memory CD4+ T cell || id:ebi-a-GCST90001841	Crohn's disease	MR Egger	19	0.107483	0.0558568	0.0712287	1.11347	0.998005	1.2423	7.80283	0.970583	NA	NA
CD3 on Central Memory CD4+ T cell || id:ebi-a-GCST90001841	Crohn's disease	Weighted median	19	0.0537629	0.0369858	0.146055	1.05523	0.981445	1.13457	NA	NA	NA	NA
CD3 on Naive CD4+ T cell || id:ebi-a-GCST90001842	Crohn's disease	Inverse variance weighted	20	0.0305571	0.0261749	0.243041	1.03103	0.979468	1.0853	11.1585	0.918393	-0.0184203	0.112857
CD3 on Naive CD4+ T cell || id:ebi-a-GCST90001842	Crohn's disease	MR Egger	20	0.0857763	0.0422212	0.0572263	1.08956	1.00303	1.18356	8.38019	0.972423	NA	NA
CD3 on Naive CD4+ T cell || id:ebi-a-GCST90001842	Crohn's disease	Weighted median	20	0.0519774	0.0327117	0.112071	1.05335	0.987936	1.1231	NA	NA	NA	NA
CD3 on Effector Memory CD4+ T cell || id:ebi-a-GCST90001843	Crohn's disease	Inverse variance weighted	14	0.0545004	0.0347195	0.116477	1.05601	0.986541	1.13038	9.36351	0.744969	-0.0189644	0.335669
CD3 on Effector Memory CD4+ T cell || id:ebi-a-GCST90001843	Crohn's disease	MR Egger	14	0.122379	0.0760632	0.133613	1.13018	0.973648	1.31188	8.35755	0.756602	NA	NA
CD3 on Effector Memory CD4+ T cell || id:ebi-a-GCST90001843	Crohn's disease	Weighted median	14	0.0840577	0.0440356	0.0562804	1.08769	0.99775	1.18574	NA	NA	NA	NA
CD3 on Terminally Differentiated CD4+ T cell || id:ebi-a-GCST90001844	Crohn's disease	Inverse variance weighted	16	0.124556	0.0416837	0.00280696	1.13265	1.04379	1.22907	13.5271	0.561658	-0.0353621	0.129746
CD3 on Terminally Differentiated CD4+ T cell || id:ebi-a-GCST90001844	Crohn's disease	MR Egger	16	0.310427	0.122755	0.0240847	1.36401	1.07232	1.73503	10.9355	0.691094	NA	NA
CD3 on Terminally Differentiated CD4+ T cell || id:ebi-a-GCST90001844	Crohn's disease	Weighted median	16	0.114211	0.0616389	0.0638951	1.12099	0.993421	1.26494	NA	NA	NA	NA
CD3 on CD45RA- CD4+ T cell || id:ebi-a-GCST90001845	Crohn's disease	Inverse variance weighted	22	0.0249856	0.0297852	0.401549	1.0253	0.967158	1.08694	15.3163	0.806755	-0.0287971	0.0533667
CD3 on CD45RA- CD4+ T cell || id:ebi-a-GCST90001845	Crohn's disease	MR Egger	22	0.136362	0.0618851	0.039448	1.1461	1.01518	1.2939	11.1007	0.94357	NA	NA
CD3 on CD45RA- CD4+ T cell || id:ebi-a-GCST90001845	Crohn's disease	Weighted median	22	0.0593807	0.0399897	0.137571	1.06118	0.98118	1.1477	NA	NA	NA	NA
CD3 on Central Memory CD8+ T cell || id:ebi-a-GCST90001846	Crohn's disease	Inverse variance weighted	15	0.071344	0.0384564	0.0635691	1.07395	0.995978	1.15803	14.8927	0.385527	0.000601403	0.974702
CD3 on Central Memory CD8+ T cell || id:ebi-a-GCST90001846	Crohn's disease	MR Egger	15	0.0688837	0.0859334	0.437195	1.07131	0.905248	1.26784	14.8915	0.314173	NA	NA
CD3 on Central Memory CD8+ T cell || id:ebi-a-GCST90001846	Crohn's disease	Weighted median	15	0.118772	0.050827	0.0194503	1.12611	1.01934	1.24408	NA	NA	NA	NA
CD3 on HLA DR+ T cell || id:ebi-a-GCST90001847	Crohn's disease	Inverse variance weighted	19	0.104707	0.0356099	0.00327792	1.11039	1.03553	1.19065	17.6464	0.479162	-0.0101628	0.588414
CD3 on HLA DR+ T cell || id:ebi-a-GCST90001847	Crohn's disease	MR Egger	19	0.151529	0.0921894	0.118609	1.16361	0.971259	1.39406	17.3362	0.431824	NA	NA
CD3 on HLA DR+ T cell || id:ebi-a-GCST90001847	Crohn's disease	Weighted median	19	0.139541	0.0518518	0.00712043	1.14975	1.03864	1.27274	NA	NA	NA	NA
CD3 on Natural Killer T || id:ebi-a-GCST90001848	Crohn's disease	Inverse variance weighted	9	-0.0263323	0.0719157	0.714249	0.974011	0.845957	1.12145	8.86777	0.353574	-0.0172046	0.620554
CD3 on Natural Killer T || id:ebi-a-GCST90001848	Crohn's disease	MR Egger	9	0.0630538	0.188394	0.747663	1.06508	0.73624	1.54081	8.54064	0.287339	NA	NA
CD3 on Natural Killer T || id:ebi-a-GCST90001848	Crohn's disease	Weighted median	9	0.00839827	0.0879289	0.923908	1.00843	0.848791	1.1981	NA	NA	NA	NA
CD3 on HLA DR+ CD4+ T cell || id:ebi-a-GCST90001849	Crohn's disease	Inverse variance weighted	25	0.0791169	0.0370747	0.0328441	1.08233	1.00647	1.16391	36.6623	0.0472726	0.002842	0.883182
CD3 on HLA DR+ CD4+ T cell || id:ebi-a-GCST90001849	Crohn's disease	MR Egger	25	0.0670795	0.0894243	0.460784	1.06938	0.897455	1.27424	36.6272	0.0355568	NA	NA
CD3 on HLA DR+ CD4+ T cell || id:ebi-a-GCST90001849	Crohn's disease	Weighted median	25	0.112566	0.0449459	0.0122635	1.11915	1.02477	1.22221	NA	NA	NA	NA
CD3 on HLA DR+ CD8+ T cell || id:ebi-a-GCST90001850	Crohn's disease	Inverse variance weighted	16	0.0686233	0.0614113	0.263807	1.07103	0.949573	1.20803	32.9149	0.00482277	-0.00922323	0.825859
CD3 on HLA DR+ CD8+ T cell || id:ebi-a-GCST90001850	Crohn's disease	MR Egger	16	0.115663	0.219217	0.606027	1.12262	0.730517	1.72518	32.7972	0.00308141	NA	NA
CD3 on HLA DR+ CD8+ T cell || id:ebi-a-GCST90001850	Crohn's disease	Weighted median	16	0.0756409	0.0653124	0.246807	1.07858	0.948976	1.22587	NA	NA	NA	NA
CD3 on T cell || id:ebi-a-GCST90001851	Crohn's disease	Inverse variance weighted	23	0.0422932	0.0330563	0.200746	1.0432	0.977754	1.11303	17.2718	0.748188	-0.0252892	0.125732
CD3 on T cell || id:ebi-a-GCST90001851	Crohn's disease	MR Egger	23	0.156394	0.0788192	0.0604542	1.16929	1.00191	1.36463	14.7289	0.836307	NA	NA
CD3 on T cell || id:ebi-a-GCST90001851	Crohn's disease	Weighted median	23	0.0897095	0.0456453	0.0493726	1.09386	1.00024	1.19623	NA	NA	NA	NA
CD3 on CD39+ resting CD4 regulatory T cell || id:ebi-a-GCST90001852	Crohn's disease	Inverse variance weighted	12	0.0586353	0.057679	0.309354	1.06039	0.947038	1.18731	17.686	0.0891579	-0.010505	0.773743
CD3 on CD39+ resting CD4 regulatory T cell || id:ebi-a-GCST90001852	Crohn's disease	MR Egger	12	0.10211	0.159029	0.535259	1.10751	0.810919	1.51257	17.533	0.0633703	NA	NA
CD3 on CD39+ resting CD4 regulatory T cell || id:ebi-a-GCST90001852	Crohn's disease	Weighted median	12	0.125984	0.0648604	0.0520897	1.13426	0.998859	1.28803	NA	NA	NA	NA
CD3 on activated CD4 regulatory T cell || id:ebi-a-GCST90001853	Crohn's disease	Inverse variance weighted	14	0.0481863	0.0300833	0.109208	1.04937	0.989281	1.1131	9.72257	0.716448	-0.00407751	0.790782
CD3 on activated CD4 regulatory T cell || id:ebi-a-GCST90001853	Crohn's disease	MR Egger	14	0.0592976	0.0508187	0.265938	1.06109	0.960494	1.17222	9.64897	0.646725	NA	NA
CD3 on activated CD4 regulatory T cell || id:ebi-a-GCST90001853	Crohn's disease	Weighted median	14	0.0538646	0.0373145	0.148871	1.05534	0.980913	1.13542	NA	NA	NA	NA
CD3 on CD39+ activated CD4 regulatory T cell || id:ebi-a-GCST90001854	Crohn's disease	Inverse variance weighted	19	0.0229493	0.0353977	0.516773	1.02321	0.954631	1.09673	25.4425	0.113206	-0.0133227	0.494157
CD3 on CD39+ activated CD4 regulatory T cell || id:ebi-a-GCST90001854	Crohn's disease	MR Egger	19	0.0636262	0.0683996	0.365282	1.06569	0.931987	1.21858	24.7321	0.100868	NA	NA
CD3 on CD39+ activated CD4 regulatory T cell || id:ebi-a-GCST90001854	Crohn's disease	Weighted median	19	0.0586825	0.0375395	0.118001	1.06044	0.985216	1.1414	NA	NA	NA	NA
CD3 on secreting CD4 regulatory T cell || id:ebi-a-GCST90001855	Crohn's disease	Inverse variance weighted	12	0.0622844	0.03049	0.0410738	1.06426	1.00253	1.1298	1.5267	0.999585	-0.00716874	0.645493
CD3 on secreting CD4 regulatory T cell || id:ebi-a-GCST90001855	Crohn's disease	MR Egger	12	0.0827553	0.0528457	0.148422	1.08628	0.979393	1.20482	1.30177	0.999432	NA	NA
CD3 on secreting CD4 regulatory T cell || id:ebi-a-GCST90001855	Crohn's disease	Weighted median	12	0.0625759	0.0364156	0.085727	1.06458	0.99124	1.14334	NA	NA	NA	NA
CD3 on CD39+ secreting CD4 regulatory T cell || id:ebi-a-GCST90001856	Crohn's disease	Inverse variance weighted	20	0.0246225	0.0341174	0.47048	1.02493	0.958632	1.09581	22.7545	0.248326	-0.0209016	0.226893
CD3 on CD39+ secreting CD4 regulatory T cell || id:ebi-a-GCST90001856	Crohn's disease	MR Egger	20	0.0950277	0.0655506	0.164347	1.09969	0.967102	1.25045	20.934	0.282757	NA	NA
CD3 on CD39+ secreting CD4 regulatory T cell || id:ebi-a-GCST90001856	Crohn's disease	Weighted median	20	0.0513948	0.0422167	0.22345	1.05274	0.969136	1.14355	NA	NA	NA	NA
CD3 on activated & secreting CD4 regulatory T cell || id:ebi-a-GCST90001857	Crohn's disease	Inverse variance weighted	12	0.0505201	0.0305647	0.0983538	1.05182	0.990657	1.11675	5.46204	0.906746	-0.00945553	0.525198
CD3 on activated & secreting CD4 regulatory T cell || id:ebi-a-GCST90001857	Crohn's disease	MR Egger	12	0.0763827	0.0497753	0.155903	1.07938	0.979046	1.18999	5.02865	0.889256	NA	NA
CD3 on activated & secreting CD4 regulatory T cell || id:ebi-a-GCST90001857	Crohn's disease	Weighted median	12	0.0554633	0.0364573	0.128178	1.05703	0.984134	1.13533	NA	NA	NA	NA
CD3 on CD45RA+ CD4+ T cell || id:ebi-a-GCST90001858	Crohn's disease	Inverse variance weighted	21	0.0125163	0.0269753	0.642654	1.01259	0.960448	1.06757	20.5639	0.423185	-0.02229	0.0605591
CD3 on CD45RA+ CD4+ T cell || id:ebi-a-GCST90001858	Crohn's disease	MR Egger	21	0.0862245	0.0455239	0.0735454	1.09005	0.997002	1.19178	16.583	0.618098	NA	NA
CD3 on CD45RA+ CD4+ T cell || id:ebi-a-GCST90001858	Crohn's disease	Weighted median	21	0.047075	0.0329102	0.152601	1.0482	0.982722	1.11804	NA	NA	NA	NA
CD3 on CD8+ T cell || id:ebi-a-GCST90001859	Crohn's disease	Inverse variance weighted	18	0.0311948	0.0414251	0.451426	1.03169	0.951231	1.11895	22.5251	0.165361	-0.0456716	0.0157343
CD3 on CD8+ T cell || id:ebi-a-GCST90001859	Crohn's disease	MR Egger	18	0.237142	0.0843102	0.0125084	1.26762	1.07454	1.49539	15.2287	0.507954	NA	NA
CD3 on CD8+ T cell || id:ebi-a-GCST90001859	Crohn's disease	Weighted median	18	0.128134	0.0515097	0.0128618	1.13671	1.02755	1.25746	NA	NA	NA	NA
CD3 on CD39+ CD4+ T cell || id:ebi-a-GCST90001860	Crohn's disease	Inverse variance weighted	17	0.0528575	0.0317681	0.0961412	1.05428	0.990636	1.12201	19.4312	0.24694	-0.00114014	0.94426
CD3 on CD39+ CD4+ T cell || id:ebi-a-GCST90001860	Crohn's disease	MR Egger	17	0.0561967	0.0572884	0.342178	1.05781	0.945455	1.18351	19.4246	0.195133	NA	NA
CD3 on CD39+ CD4+ T cell || id:ebi-a-GCST90001860	Crohn's disease	Weighted median	17	0.0602221	0.0355309	0.0900903	1.06207	0.990626	1.13867	NA	NA	NA	NA
CD3 on CD28+ CD4+ T cell || id:ebi-a-GCST90001861	Crohn's disease	Inverse variance weighted	17	0.0492325	0.0352967	0.163071	1.05046	0.980249	1.12571	10.7748	0.823168	-0.0214132	0.203108
CD3 on CD28+ CD4+ T cell || id:ebi-a-GCST90001861	Crohn's disease	MR Egger	17	0.128116	0.0689855	0.0830364	1.13668	0.992929	1.30125	9.00357	0.87733	NA	NA
CD3 on CD28+ CD4+ T cell || id:ebi-a-GCST90001861	Crohn's disease	Weighted median	17	0.0836811	0.0452884	0.0646401	1.08728	0.994929	1.18821	NA	NA	NA	NA
CD3 on CD28+ CD4-CD8- T cell || id:ebi-a-GCST90001862	Crohn's disease	Inverse variance weighted	8	-0.146366	0.0781317	0.0610239	0.863842	0.741186	1.0068	8.50246	0.290376	-0.136128	0.0500101
CD3 on CD28+ CD4-CD8- T cell || id:ebi-a-GCST90001862	Crohn's disease	MR Egger	8	0.5964	0.311739	0.104253	1.81557	0.985498	3.34481	2.51581	0.866694	NA	NA
CD3 on CD28+ CD4-CD8- T cell || id:ebi-a-GCST90001862	Crohn's disease	Weighted median	8	-0.13747	0.0961128	0.152631	0.87156	0.721913	1.05223	NA	NA	NA	NA
CD3 on CD28+ CD45RA- CD8+ T cell || id:ebi-a-GCST90001863	Crohn's disease	Inverse variance weighted	14	0.088902	0.0401471	0.026801	1.09297	1.01027	1.18245	11.9434	0.532294	-0.0424543	0.0958139
CD3 on CD28+ CD45RA- CD8+ T cell || id:ebi-a-GCST90001863	Crohn's disease	MR Egger	14	0.269896	0.107887	0.0278315	1.30983	1.06018	1.61827	8.6766	0.730276	NA	NA
CD3 on CD28+ CD45RA- CD8+ T cell || id:ebi-a-GCST90001863	Crohn's disease	Weighted median	14	0.124225	0.0547443	0.0232569	1.13227	1.01707	1.26052	NA	NA	NA	NA
CD3 on CD28+ CD45RA+ CD8+ T cell || id:ebi-a-GCST90001864	Crohn's disease	Inverse variance weighted	18	0.0500462	0.0291018	0.0854881	1.05132	0.993031	1.11303	9.82082	0.910956	-0.017687	0.236609
CD3 on CD28+ CD45RA+ CD8+ T cell || id:ebi-a-GCST90001864	Crohn's disease	MR Egger	18	0.104484	0.0529801	0.0661346	1.11014	1.00064	1.23161	8.30881	0.939137	NA	NA
CD3 on CD28+ CD45RA+ CD8+ T cell || id:ebi-a-GCST90001864	Crohn's disease	Weighted median	18	0.0694292	0.0370342	0.0608297	1.0719	0.996847	1.1526	NA	NA	NA	NA
CD3 on CD28- CD8+ T cell || id:ebi-a-GCST90001865	Crohn's disease	Inverse variance weighted	16	0.12389	0.0420045	0.00318341	1.13189	1.04244	1.22902	10.2074	0.806494	-0.010659	0.68685
CD3 on CD28- CD8+ T cell || id:ebi-a-GCST90001865	Crohn's disease	MR Egger	16	0.182	0.14729	0.23692	1.19961	0.898805	1.6011	10.038	0.759401	NA	NA
CD3 on CD28- CD8+ T cell || id:ebi-a-GCST90001865	Crohn's disease	Weighted median	16	0.150845	0.0585162	0.00994226	1.16282	1.03681	1.30413	NA	NA	NA	NA
CD3 on CD39+ CD8+ T cell || id:ebi-a-GCST90001866	Crohn's disease	Inverse variance weighted	12	0.0929635	0.0478193	0.0518887	1.09742	0.999238	1.20525	15.2621	0.170808	-0.00805234	0.805887
CD3 on CD39+ CD8+ T cell || id:ebi-a-GCST90001866	Crohn's disease	MR Egger	12	0.125841	0.139554	0.388396	1.1341	0.862704	1.49088	15.1656	0.126141	NA	NA
CD3 on CD39+ CD8+ T cell || id:ebi-a-GCST90001866	Crohn's disease	Weighted median	12	0.144502	0.0573858	0.0117998	1.15546	1.03254	1.29302	NA	NA	NA	NA
CD3 on CD4+ T cell || id:ebi-a-GCST90001867	Crohn's disease	Inverse variance weighted	20	-0.0224318	0.0525009	0.669186	0.977818	0.882203	1.0838	24.6705	0.171677	-0.0227694	0.361759
CD3 on CD4+ T cell || id:ebi-a-GCST90001867	Crohn's disease	MR Egger	20	0.107557	0.148558	0.478364	1.11355	0.832256	1.48993	23.5259	0.171182	NA	NA
CD3 on CD4+ T cell || id:ebi-a-GCST90001867	Crohn's disease	Weighted median	20	0.0485168	0.0677553	0.473955	1.04971	0.91917	1.1988	NA	NA	NA	NA
CD3 on CD4 regulatory T cell || id:ebi-a-GCST90001868	Crohn's disease	Inverse variance weighted	7	0.0485675	0.0316331	0.124701	1.04977	0.986656	1.11691	3.89954	0.690269	-0.0168477	0.471091
CD3 on CD4 regulatory T cell || id:ebi-a-GCST90001868	Crohn's disease	MR Egger	7	0.0869238	0.0585108	0.197521	1.09081	0.972624	1.22336	3.29233	0.655017	NA	NA
CD3 on CD4 regulatory T cell || id:ebi-a-GCST90001868	Crohn's disease	Weighted median	7	0.0595589	0.036331	0.101143	1.06137	0.988418	1.1397	NA	NA	NA	NA
CD3 on resting CD4 regulatory T cell || id:ebi-a-GCST90001869	Crohn's disease	Inverse variance weighted	27	-0.0674678	0.0380155	0.07594	0.934758	0.86764	1.00707	28.8885	0.316177	-0.0337161	0.135186
CD3 on resting CD4 regulatory T cell || id:ebi-a-GCST90001869	Crohn's disease	MR Egger	27	0.102319	0.116046	0.386332	1.10774	0.882381	1.39065	26.374	0.387862	NA	NA
CD3 on resting CD4 regulatory T cell || id:ebi-a-GCST90001869	Crohn's disease	Weighted median	27	-0.0243193	0.0541801	0.653533	0.975974	0.877646	1.08532	NA	NA	NA	NA
CD34 on Hematopoietic Stem Cell || id:ebi-a-GCST90001870	Crohn's disease	Inverse variance weighted	9	0.00944855	0.0411398	0.818349	1.00949	0.931289	1.09426	5.77726	0.672166	0.0160258	0.777394
CD34 on Hematopoietic Stem Cell || id:ebi-a-GCST90001870	Crohn's disease	MR Egger	9	-0.0568997	0.229507	0.811311	0.944689	0.60246	1.48132	5.69092	0.576267	NA	NA
CD34 on Hematopoietic Stem Cell || id:ebi-a-GCST90001870	Crohn's disease	Weighted median	9	0.0294763	0.0548457	0.590963	1.02992	0.924945	1.1468	NA	NA	NA	NA
HVEM on T cell || id:ebi-a-GCST90001871	Crohn's disease	Inverse variance weighted	19	-0.0381108	0.0381311	0.317569	0.962606	0.893287	1.03731	30.0408	0.0370516	-0.0504502	0.150912
HVEM on T cell || id:ebi-a-GCST90001871	Crohn's disease	MR Egger	19	0.160996	0.137414	0.257512	1.17468	0.897327	1.53776	26.5127	0.0656131	NA	NA
HVEM on T cell || id:ebi-a-GCST90001871	Crohn's disease	Weighted median	19	-0.0425258	0.0465381	0.360829	0.958366	0.874817	1.04989	NA	NA	NA	NA
HVEM on naive CD8+ T cell || id:ebi-a-GCST90001872	Crohn's disease	Inverse variance weighted	12	0.108281	0.0466896	0.0203866	1.11436	1.01691	1.22115	19.6142	0.0509201	-0.00730884	0.867403
HVEM on naive CD8+ T cell || id:ebi-a-GCST90001872	Crohn's disease	MR Egger	12	0.136308	0.170762	0.443281	1.14603	0.820053	1.6016	19.5569	0.0337339	NA	NA
HVEM on naive CD8+ T cell || id:ebi-a-GCST90001872	Crohn's disease	Weighted median	12	0.0797692	0.0527984	0.130833	1.08304	0.976563	1.20112	NA	NA	NA	NA
HVEM on Effector Memory CD8+ T cell || id:ebi-a-GCST90001873	Crohn's disease	Inverse variance weighted	11	-0.0085409	0.0498999	0.864097	0.991495	0.899115	1.09337	21.1846	0.0198423	-0.00416885	0.93708
HVEM on Effector Memory CD8+ T cell || id:ebi-a-GCST90001873	Crohn's disease	MR Egger	11	0.00615064	0.188472	0.974679	1.00617	0.695409	1.4558	21.1691	0.0119203	NA	NA
HVEM on Effector Memory CD8+ T cell || id:ebi-a-GCST90001873	Crohn's disease	Weighted median	11	-0.0640144	0.0493722	0.19478	0.937992	0.851476	1.0333	NA	NA	NA	NA
HVEM on Terminally Differentiated CD8+ T cell || id:ebi-a-GCST90001874	Crohn's disease	Inverse variance weighted	21	0.00592699	0.0256671	0.817379	1.00594	0.95659	1.05785	15.4331	0.751114	-0.00102687	0.965479
HVEM on Terminally Differentiated CD8+ T cell || id:ebi-a-GCST90001874	Crohn's disease	MR Egger	21	0.00977654	0.0914587	0.915992	1.00982	0.844102	1.20808	15.4311	0.694829	NA	NA
HVEM on Terminally Differentiated CD8+ T cell || id:ebi-a-GCST90001874	Crohn's disease	Weighted median	21	0.00480137	0.0364761	0.895276	1.00481	0.935483	1.07928	NA	NA	NA	NA
HVEM on CD4+ T cell || id:ebi-a-GCST90001875	Crohn's disease	Inverse variance weighted	13	-0.048885	0.0568939	0.390213	0.952291	0.851806	1.06463	36.9787	0.000225193	0.0138826	0.809964
HVEM on CD4+ T cell || id:ebi-a-GCST90001875	Crohn's disease	MR Egger	13	-0.0996824	0.214564	0.651292	0.905125	0.594385	1.37832	36.7758	0.000125634	NA	NA
HVEM on CD4+ T cell || id:ebi-a-GCST90001875	Crohn's disease	Weighted median	13	0.0217396	0.0469302	0.643198	1.02198	0.932167	1.12044	NA	NA	NA	NA
HVEM on Central Memory CD4+ T cell || id:ebi-a-GCST90001876	Crohn's disease	Inverse variance weighted	9	-0.0661801	0.0681007	0.331151	0.935962	0.819011	1.06961	19.8588	0.0108836	-0.0394326	0.617554
HVEM on Central Memory CD4+ T cell || id:ebi-a-GCST90001876	Crohn's disease	MR Egger	9	0.0886526	0.304907	0.779666	1.0927	0.601117	1.98629	19.1138	0.00783812	NA	NA
HVEM on Central Memory CD4+ T cell || id:ebi-a-GCST90001876	Crohn's disease	Weighted median	9	-0.0175037	0.0566406	0.757298	0.982649	0.879397	1.09802	NA	NA	NA	NA
HVEM on naive CD4+ T cell || id:ebi-a-GCST90001877	Crohn's disease	Inverse variance weighted	14	-0.0731183	0.0542681	0.177867	0.929491	0.835701	1.03381	33.6171	0.00137559	-0.144397	0.0317199
HVEM on naive CD4+ T cell || id:ebi-a-GCST90001877	Crohn's disease	MR Egger	14	0.433505	0.213535	0.0651129	1.54265	1.01509	2.34441	22.5291	0.032	NA	NA
HVEM on naive CD4+ T cell || id:ebi-a-GCST90001877	Crohn's disease	Weighted median	14	-0.0296894	0.0476087	0.532881	0.970747	0.884262	1.06569	NA	NA	NA	NA
HVEM on Effector Memory CD4+ T cell || id:ebi-a-GCST90001878	Crohn's disease	Inverse variance weighted	12	-0.0152353	0.0376785	0.685954	0.98488	0.914768	1.06037	12.5476	0.323918	0.00833153	0.83184
HVEM on Effector Memory CD4+ T cell || id:ebi-a-GCST90001878	Crohn's disease	MR Egger	12	-0.0467038	0.14966	0.7614	0.95437	0.711744	1.27971	12.4883	0.253705	NA	NA
HVEM on Effector Memory CD4+ T cell || id:ebi-a-GCST90001878	Crohn's disease	Weighted median	12	-0.00867921	0.049285	0.860213	0.991358	0.900074	1.0919	NA	NA	NA	NA
HVEM on Terminally Differentiated CD4+ T cell || id:ebi-a-GCST90001879	Crohn's disease	Inverse variance weighted	20	-0.00401609	0.032737	0.902362	0.995992	0.934092	1.06199	25.4724	0.145572	-0.0300932	0.442297
HVEM on Terminally Differentiated CD4+ T cell || id:ebi-a-GCST90001879	Crohn's disease	MR Egger	20	0.125818	0.168535	0.464982	1.13408	0.815046	1.57798	24.6279	0.135513	NA	NA
HVEM on Terminally Differentiated CD4+ T cell || id:ebi-a-GCST90001879	Crohn's disease	Weighted median	20	-0.00659957	0.043322	0.878921	0.993422	0.912552	1.08146	NA	NA	NA	NA
HVEM on CD45RA- CD4+ T cell || id:ebi-a-GCST90001880	Crohn's disease	Inverse variance weighted	12	-0.0216609	0.0625918	0.729293	0.978572	0.865593	1.1063	35.3383	0.000217884	-0.020818	0.721316
HVEM on CD45RA- CD4+ T cell || id:ebi-a-GCST90001880	Crohn's disease	MR Egger	12	0.0638013	0.241867	0.797301	1.06588	0.663479	1.71234	34.8688	0.000131466	NA	NA
HVEM on CD45RA- CD4+ T cell || id:ebi-a-GCST90001880	Crohn's disease	Weighted median	12	0.0313429	0.0501911	0.532319	1.03184	0.935166	1.13851	NA	NA	NA	NA
HVEM on CD8+ T cell || id:ebi-a-GCST90001881	Crohn's disease	Inverse variance weighted	10	0.0145283	0.0415001	0.726279	1.01463	0.935371	1.10061	10.3606	0.322085	-0.00882972	0.803143
HVEM on CD8+ T cell || id:ebi-a-GCST90001881	Crohn's disease	MR Egger	10	0.051013	0.148209	0.73957	1.05234	0.78704	1.40706	10.2753	0.24623	NA	NA
HVEM on CD8+ T cell || id:ebi-a-GCST90001881	Crohn's disease	Weighted median	10	0.0542702	0.0546609	0.320782	1.05577	0.948508	1.17516	NA	NA	NA	NA
HVEM on Central Memory CD8+ T cell || id:ebi-a-GCST90001882	Crohn's disease	Inverse variance weighted	16	0.00861595	0.0300244	0.774139	1.00865	0.951009	1.06979	11.1731	0.740228	0.00969781	0.788811
HVEM on Central Memory CD8+ T cell || id:ebi-a-GCST90001882	Crohn's disease	MR Egger	16	-0.0263616	0.131577	0.844087	0.973983	0.752577	1.26053	11.0986	0.678276	NA	NA
HVEM on Central Memory CD8+ T cell || id:ebi-a-GCST90001882	Crohn's disease	Weighted median	16	-0.0160307	0.043022	0.709433	0.984097	0.904517	1.07068	NA	NA	NA	NA
CD16-CD56 on Natural Killer T || id:ebi-a-GCST90001883	Crohn's disease	Inverse variance weighted	20	-0.0162805	0.0401494	0.685112	0.983851	0.909397	1.0644	20.907	0.34196	-0.0069158	0.729465
CD16-CD56 on Natural Killer T || id:ebi-a-GCST90001883	Crohn's disease	MR Egger	20	0.012699	0.0921742	0.891951	1.01278	0.845386	1.21332	20.7647	0.29145	NA	NA
CD16-CD56 on Natural Killer T || id:ebi-a-GCST90001883	Crohn's disease	Weighted median	20	-0.0357114	0.052977	0.500253	0.964919	0.869753	1.0705	NA	NA	NA	NA
CD16-CD56 on Natural Killer || id:ebi-a-GCST90001884	Crohn's disease	Inverse variance weighted	15	-0.0504618	0.0556802	0.364787	0.95079	0.852489	1.06043	33.5983	0.00236008	-0.0495191	0.126471
CD16-CD56 on Natural Killer || id:ebi-a-GCST90001884	Crohn's disease	MR Egger	15	0.102076	0.107226	0.358476	1.10747	0.89755	1.36648	27.8802	0.00940447	NA	NA
CD16-CD56 on Natural Killer || id:ebi-a-GCST90001884	Crohn's disease	Weighted median	15	0.00813003	0.0484624	0.866773	1.00816	0.916809	1.10862	NA	NA	NA	NA
CD16-CD56 on HLA DR+ Natural Killer || id:ebi-a-GCST90001885	Crohn's disease	Inverse variance weighted	16	0.108945	0.049165	0.0266977	1.1151	1.01266	1.2279	14.9236	0.456937	-0.0106895	0.716735
CD16-CD56 on HLA DR+ Natural Killer || id:ebi-a-GCST90001885	Crohn's disease	MR Egger	16	0.174834	0.184986	0.360626	1.19105	0.828831	1.71156	14.7789	0.393437	NA	NA
CD16-CD56 on HLA DR+ Natural Killer || id:ebi-a-GCST90001885	Crohn's disease	Weighted median	16	0.122985	0.0706039	0.0815269	1.13087	0.984719	1.29871	NA	NA	NA	NA
CD28 on CD39+ activated CD4 regulatory T cell || id:ebi-a-GCST90001886	Crohn's disease	Inverse variance weighted	8	-0.146968	0.0844625	0.0818516	0.863321	0.731605	1.01875	19.2628	0.00740278	0.0255757	0.631057
CD28 on CD39+ activated CD4 regulatory T cell || id:ebi-a-GCST90001886	Crohn's disease	MR Egger	8	-0.266659	0.252955	0.33239	0.765934	0.466522	1.25751	18.4751	0.00514832	NA	NA
CD28 on CD39+ activated CD4 regulatory T cell || id:ebi-a-GCST90001886	Crohn's disease	Weighted median	8	-0.125336	0.06703	0.0615051	0.882201	0.773589	1.00606	NA	NA	NA	NA
CD28 on secreting CD4 regulatory T cell || id:ebi-a-GCST90001887	Crohn's disease	Inverse variance weighted	9	-0.0583639	0.0742475	0.431825	0.943307	0.815553	1.09107	20.4216	0.00885344	-0.00779401	0.853491
CD28 on secreting CD4 regulatory T cell || id:ebi-a-GCST90001887	Crohn's disease	MR Egger	9	-0.0264435	0.184449	0.890042	0.973903	0.678438	1.39805	20.315	0.00492791	NA	NA
CD28 on secreting CD4 regulatory T cell || id:ebi-a-GCST90001887	Crohn's disease	Weighted median	9	-0.0284478	0.065133	0.662282	0.971953	0.855466	1.1043	NA	NA	NA	NA
CD28 on CD39+ secreting CD4 regulatory T cell || id:ebi-a-GCST90001888	Crohn's disease	Inverse variance weighted	15	-0.105883	0.0413274	0.0104056	0.89953	0.82954	0.975426	15.4702	0.346789	0.000180428	0.992473
CD28 on CD39+ secreting CD4 regulatory T cell || id:ebi-a-GCST90001888	Crohn's disease	MR Egger	15	-0.106659	0.0914212	0.264296	0.898832	0.751379	1.07522	15.47	0.278934	NA	NA
CD28 on CD39+ secreting CD4 regulatory T cell || id:ebi-a-GCST90001888	Crohn's disease	Weighted median	15	-0.153311	0.0517451	0.00304833	0.857862	0.775124	0.949432	NA	NA	NA	NA
CD28 on activated & secreting CD4 regulatory T cell || id:ebi-a-GCST90001889	Crohn's disease	Inverse variance weighted	15	-4.84e-05	0.0488302	0.999209	0.999952	0.908686	1.10038	16.5046	0.283537	0.0138652	0.556749
CD28 on activated & secreting CD4 regulatory T cell || id:ebi-a-GCST90001889	Crohn's disease	MR Egger	15	-0.0623073	0.114677	0.596098	0.939594	0.750456	1.1764	16.0553	0.246158	NA	NA
CD28 on activated & secreting CD4 regulatory T cell || id:ebi-a-GCST90001889	Crohn's disease	Weighted median	15	-0.0134957	0.0625172	0.829088	0.986595	0.872817	1.1152	NA	NA	NA	NA
CD28 on CD45RA+ CD4+ T cell || id:ebi-a-GCST90001890	Crohn's disease	Inverse variance weighted	9	-0.0573833	0.0664986	0.388179	0.944232	0.828846	1.07568	18.4714	0.0179572	0.0134343	0.726351
CD28 on CD45RA+ CD4+ T cell || id:ebi-a-GCST90001890	Crohn's disease	MR Egger	9	-0.108703	0.157476	0.512246	0.896997	0.658787	1.22134	18.1276	0.0114074	NA	NA
CD28 on CD45RA+ CD4+ T cell || id:ebi-a-GCST90001890	Crohn's disease	Weighted median	9	-0.0341072	0.0628127	0.587131	0.966468	0.854516	1.09309	NA	NA	NA	NA
CD28 on CD45RA- CD4 not regulatory T cell || id:ebi-a-GCST90001891	Crohn's disease	Inverse variance weighted	12	-0.0558297	0.0583815	0.338926	0.9457	0.843448	1.06035	23.4676	0.0151746	-0.0233985	0.400984
CD28 on CD45RA- CD4 not regulatory T cell || id:ebi-a-GCST90001891	Crohn's disease	MR Egger	12	0.0400749	0.124241	0.753673	1.04089	0.815922	1.32788	21.791	0.0162057	NA	NA
CD28 on CD45RA- CD4 not regulatory T cell || id:ebi-a-GCST90001891	Crohn's disease	Weighted median	12	-0.0150866	0.0515954	0.769979	0.985027	0.890285	1.08985	NA	NA	NA	NA
CD28 on CD39+ CD4+ T cell || id:ebi-a-GCST90001892	Crohn's disease	Inverse variance weighted	11	-0.0614065	0.0437314	0.160267	0.940441	0.86319	1.0246	18.7425	0.0436578	0.0349157	0.176988
CD28 on CD39+ CD4+ T cell || id:ebi-a-GCST90001892	Crohn's disease	MR Egger	11	-0.166309	0.0827278	0.0752898	0.846785	0.720035	0.995846	15.134	0.0873205	NA	NA
CD28 on CD39+ CD4+ T cell || id:ebi-a-GCST90001892	Crohn's disease	Weighted median	11	-0.1137	0.0398506	0.0043286	0.892525	0.825466	0.965033	NA	NA	NA	NA
CD28 on CD28+ CD45RA- CD8+ T cell || id:ebi-a-GCST90001893	Crohn's disease	Inverse variance weighted	12	-0.0679473	0.0680155	0.317796	0.93431	0.817702	1.06755	27.9686	0.00327335	-0.0207945	0.481215
CD28 on CD28+ CD45RA- CD8+ T cell || id:ebi-a-GCST90001893	Crohn's disease	MR Egger	12	0.0258305	0.145813	0.862929	1.02617	0.77108	1.36564	26.5478	0.0030693	NA	NA
CD28 on CD28+ CD45RA- CD8+ T cell || id:ebi-a-GCST90001893	Crohn's disease	Weighted median	12	-0.0194916	0.0562394	0.728905	0.980697	0.878341	1.09498	NA	NA	NA	NA
CD28 on CD28+ CD4+ T cell || id:ebi-a-GCST90001894	Crohn's disease	Inverse variance weighted	21	-0.0280548	0.0423276	0.507458	0.972335	0.894924	1.05644	25.4896	0.183336	0.0348196	0.145922
CD28 on CD28+ CD4+ T cell || id:ebi-a-GCST90001894	Crohn's disease	MR Egger	21	-0.176958	0.106428	0.112779	0.837815	0.680072	1.03215	22.7384	0.249063	NA	NA
CD28 on CD28+ CD4+ T cell || id:ebi-a-GCST90001894	Crohn's disease	Weighted median	21	-0.00420417	0.0576986	0.941914	0.995805	0.889324	1.11503	NA	NA	NA	NA
CD28 on CD28+ CD4-CD8- T cell || id:ebi-a-GCST90001895	Crohn's disease	Inverse variance weighted	3	0.0436056	0.132277	0.741661	1.04457	0.806012	1.35374	0.422401	0.809612	-0.0420745	0.699912
CD28 on CD28+ CD4-CD8- T cell || id:ebi-a-GCST90001895	Crohn's disease	MR Egger	3	0.318996	0.556257	0.668523	1.37575	0.462426	4.09293	0.162608	0.686767	NA	NA
CD28 on CD28+ CD4-CD8- T cell || id:ebi-a-GCST90001895	Crohn's disease	Weighted median	3	0.0120815	0.162788	0.940838	1.01215	0.735664	1.39256	NA	NA	NA	NA
CD28 on CD28+ CD45RA+ CD8+ T cell || id:ebi-a-GCST90001896	Crohn's disease	Inverse variance weighted	12	-0.121098	0.0473354	0.0105183	0.885947	0.807449	0.972076	15.4865	0.161291	0.000324003	0.990292
CD28 on CD28+ CD45RA+ CD8+ T cell || id:ebi-a-GCST90001896	Crohn's disease	MR Egger	12	-0.12209	0.093713	0.221842	0.885069	0.736558	1.06352	15.4862	0.115314	NA	NA
CD28 on CD28+ CD45RA+ CD8+ T cell || id:ebi-a-GCST90001896	Crohn's disease	Weighted median	12	-0.139149	0.0511626	0.00653333	0.870098	0.787078	0.961875	NA	NA	NA	NA
CD28 on CD39+ CD8+ T cell || id:ebi-a-GCST90001897	Crohn's disease	Inverse variance weighted	10	-0.0790003	0.0550525	0.151288	0.92404	0.829524	1.02932	3.01669	0.96363	0.0269639	0.46383
CD28 on CD39+ CD8+ T cell || id:ebi-a-GCST90001897	Crohn's disease	MR Egger	10	-0.235948	0.211316	0.29659	0.789821	0.52198	1.1951	2.42489	0.965141	NA	NA
CD28 on CD39+ CD8+ T cell || id:ebi-a-GCST90001897	Crohn's disease	Weighted median	10	-0.0956342	0.0691843	0.166876	0.908796	0.793553	1.04078	NA	NA	NA	NA
CD28 on CD4+ T cell || id:ebi-a-GCST90001898	Crohn's disease	Inverse variance weighted	19	-0.0705875	0.0525503	0.179195	0.931846	0.840645	1.03294	36.211	0.00662952	-0.0128615	0.631699
CD28 on CD4+ T cell || id:ebi-a-GCST90001898	Crohn's disease	MR Egger	19	-0.00770275	0.139573	0.956632	0.992327	0.754828	1.30455	35.7105	0.00501222	NA	NA
CD28 on CD4+ T cell || id:ebi-a-GCST90001898	Crohn's disease	Weighted median	19	-0.0182326	0.0558606	0.744125	0.981933	0.8801	1.09555	NA	NA	NA	NA
CD28 on CD4 regulatory T cell || id:ebi-a-GCST90001899	Crohn's disease	Inverse variance weighted	14	-0.048446	0.0575944	0.400259	0.952709	0.85101	1.06656	19.8404	0.0992615	0.0204571	0.483648
CD28 on CD4 regulatory T cell || id:ebi-a-GCST90001899	Crohn's disease	MR Egger	14	-0.145026	0.145936	0.339954	0.865	0.649819	1.15143	19.0126	0.0882236	NA	NA
CD28 on CD4 regulatory T cell || id:ebi-a-GCST90001899	Crohn's disease	Weighted median	14	-0.0272916	0.0659793	0.679138	0.973077	0.855037	1.10741	NA	NA	NA	NA
CD28 on resting CD4 regulatory T cell || id:ebi-a-GCST90001900	Crohn's disease	Inverse variance weighted	5	-0.00683753	0.0491696	0.889403	0.993186	0.901938	1.09367	0.93129	0.92003	0.0109185	0.686169
CD28 on resting CD4 regulatory T cell || id:ebi-a-GCST90001900	Crohn's disease	MR Egger	5	-0.0399068	0.0890427	0.684416	0.960879	0.807001	1.1441	0.732853	0.865451	NA	NA
CD28 on resting CD4 regulatory T cell || id:ebi-a-GCST90001900	Crohn's disease	Weighted median	5	-0.0161168	0.0517045	0.755261	0.984012	0.889178	1.08896	NA	NA	NA	NA
CD28 on CD39+ resting CD4 regulatory T cell || id:ebi-a-GCST90001901	Crohn's disease	Inverse variance weighted	12	-0.136069	0.0739406	0.0657312	0.872782	0.755034	1.00889	22.6872	0.0195582	-0.00391395	0.923255
CD28 on CD39+ resting CD4 regulatory T cell || id:ebi-a-GCST90001901	Crohn's disease	MR Egger	12	-0.116579	0.211966	0.594397	0.88996	0.58741	1.34834	22.6651	0.0120526	NA	NA
CD28 on CD39+ resting CD4 regulatory T cell || id:ebi-a-GCST90001901	Crohn's disease	Weighted median	12	-0.111007	0.0791636	0.160839	0.894932	0.76631	1.04514	NA	NA	NA	NA
CD28 on activated CD4 regulatory T cell || id:ebi-a-GCST90001902	Crohn's disease	Inverse variance weighted	11	-0.00781791	0.0514255	0.879168	0.992213	0.897079	1.09744	8.00957	0.627903	6.92e-05	0.997422
CD28 on activated CD4 regulatory T cell || id:ebi-a-GCST90001902	Crohn's disease	MR Egger	11	-0.0082023	0.126609	0.949762	0.991831	0.773867	1.27119	8.00955	0.533184	NA	NA
CD28 on activated CD4 regulatory T cell || id:ebi-a-GCST90001902	Crohn's disease	Weighted median	11	-0.0137924	0.0688999	0.841339	0.986302	0.86171	1.12891	NA	NA	NA	NA
CD86 on myeloid Dendritic Cell || id:ebi-a-GCST90001903	Crohn's disease	Inverse variance weighted	15	-0.0677658	0.0445682	0.128387	0.934479	0.856313	1.01978	13.3538	0.498875	0.0309704	0.130099
CD86 on myeloid Dendritic Cell || id:ebi-a-GCST90001903	Crohn's disease	MR Egger	15	-0.212175	0.0998614	0.0533623	0.808823	0.665043	0.983688	10.7424	0.632384	NA	NA
CD86 on myeloid Dendritic Cell || id:ebi-a-GCST90001903	Crohn's disease	Weighted median	15	-0.128354	0.0607651	0.0346607	0.879542	0.780786	0.990788	NA	NA	NA	NA
CD86 on CD62L+ myeloid Dendritic Cell || id:ebi-a-GCST90001904	Crohn's disease	Inverse variance weighted	13	0.0150724	0.0478253	0.752644	1.01519	0.924349	1.11495	9.61915	0.649333	-0.00886471	0.754234
CD86 on CD62L+ myeloid Dendritic Cell || id:ebi-a-GCST90001904	Crohn's disease	MR Egger	13	0.0630793	0.15702	0.695578	1.06511	0.782956	1.44895	9.51611	0.574365	NA	NA
CD86 on CD62L+ myeloid Dendritic Cell || id:ebi-a-GCST90001904	Crohn's disease	Weighted median	13	-0.00945756	0.0625869	0.879888	0.990587	0.876229	1.11987	NA	NA	NA	NA
CD86 on monocyte || id:ebi-a-GCST90001905	Crohn's disease	Inverse variance weighted	9	0.0569393	0.120304	0.636002	1.05859	0.836226	1.34009	23.2682	0.00303642	0.0987097	0.200704
CD86 on monocyte || id:ebi-a-GCST90001905	Crohn's disease	MR Egger	9	-0.510305	0.417327	0.260975	0.600313	0.264936	1.36023	18.1077	0.0114936	NA	NA
CD86 on monocyte || id:ebi-a-GCST90001905	Crohn's disease	Weighted median	9	0.0634169	0.1153	0.582307	1.06547	0.849956	1.33563	NA	NA	NA	NA
CD86 on granulocyte || id:ebi-a-GCST90001906	Crohn's disease	Inverse variance weighted	13	-0.0782716	0.058352	0.1798	0.924713	0.824778	1.03676	17.5342	0.130583	0.00907217	0.826817
CD86 on granulocyte || id:ebi-a-GCST90001906	Crohn's disease	MR Egger	13	-0.129749	0.237657	0.595999	0.878316	0.551256	1.39942	17.4545	0.0951307	NA	NA
CD86 on granulocyte || id:ebi-a-GCST90001906	Crohn's disease	Weighted median	13	-0.0649669	0.0645097	0.313893	0.937098	0.825797	1.0634	NA	NA	NA	NA
CCR7 on naive CD4+ T cell || id:ebi-a-GCST90001907	Crohn's disease	Inverse variance weighted	14	-0.00507704	0.0439699	0.908076	0.994936	0.912782	1.08448	11.368	0.580015	-0.00939355	0.740481
CCR7 on naive CD4+ T cell || id:ebi-a-GCST90001907	Crohn's disease	MR Egger	14	0.0400518	0.140204	0.780003	1.04086	0.790771	1.37006	11.2531	0.507358	NA	NA
CCR7 on naive CD4+ T cell || id:ebi-a-GCST90001907	Crohn's disease	Weighted median	14	-0.0281646	0.0578891	0.626594	0.972228	0.867945	1.08904	NA	NA	NA	NA
CCR7 on naive CD8+ T cell || id:ebi-a-GCST90001908	Crohn's disease	Inverse variance weighted	13	-0.0214896	0.0541139	0.69128	0.97874	0.880247	1.08825	15.2067	0.230326	-0.00907608	0.788279
CCR7 on naive CD8+ T cell || id:ebi-a-GCST90001908	Crohn's disease	MR Egger	13	0.0281823	0.189092	0.884219	1.02858	0.710038	1.49004	15.1027	0.177841	NA	NA
CCR7 on naive CD8+ T cell || id:ebi-a-GCST90001908	Crohn's disease	Weighted median	13	0.00514447	0.0686216	0.94024	1.00516	0.878663	1.14986	NA	NA	NA	NA
CD45 on CD14+ monocyte || id:ebi-a-GCST90001909	Crohn's disease	Inverse variance weighted	11	-0.0155548	0.0666023	0.815336	0.984566	0.864075	1.12186	4.81097	0.903442	-0.0330223	0.34114
CD45 on CD14+ monocyte || id:ebi-a-GCST90001909	Crohn's disease	MR Egger	11	0.183333	0.208801	0.402759	1.20121	0.797785	1.80866	3.80089	0.924022	NA	NA
CD45 on CD14+ monocyte || id:ebi-a-GCST90001909	Crohn's disease	Weighted median	11	-0.000270029	0.0836205	0.997423	0.99973	0.848601	1.17777	NA	NA	NA	NA
CD45 on B cell || id:ebi-a-GCST90001910	Crohn's disease	Inverse variance weighted	10	0.0414314	0.0930505	0.656134	1.0423	0.868535	1.25083	21.5195	0.0105332	-0.036418	0.685162
CD45 on B cell || id:ebi-a-GCST90001910	Crohn's disease	MR Egger	10	0.270231	0.552753	0.638045	1.31027	0.443452	3.87144	21.054	0.00700523	NA	NA
CD45 on B cell || id:ebi-a-GCST90001910	Crohn's disease	Weighted median	10	0.0640045	0.0873108	0.463519	1.0661	0.898414	1.26508	NA	NA	NA	NA
CD45 on Natural Killer || id:ebi-a-GCST90001911	Crohn's disease	Inverse variance weighted	21	0.00319941	0.0690935	0.963067	1.0032	0.876145	1.14869	45.7636	0.000868452	-0.0524539	0.243735
CD45 on Natural Killer || id:ebi-a-GCST90001911	Crohn's disease	MR Egger	21	0.312484	0.266011	0.254626	1.36682	0.811479	2.3022	42.5243	0.00150505	NA	NA
CD45 on Natural Killer || id:ebi-a-GCST90001911	Crohn's disease	Weighted median	21	0.0393637	0.0759159	0.604098	1.04015	0.896344	1.20703	NA	NA	NA	NA
CD45 on HLA DR+ Natural Killer || id:ebi-a-GCST90001912	Crohn's disease	Inverse variance weighted	10	0.0181021	0.0629866	0.773809	1.01827	0.900008	1.15206	5.20347	0.816223	0.051331	0.22382
CD45 on HLA DR+ Natural Killer || id:ebi-a-GCST90001912	Crohn's disease	MR Egger	10	-0.276332	0.232017	0.26779	0.758561	0.481386	1.19533	3.46493	0.901894	NA	NA
CD45 on HLA DR+ Natural Killer || id:ebi-a-GCST90001912	Crohn's disease	Weighted median	10	0.017144	0.083011	0.83638	1.01729	0.86454	1.19703	NA	NA	NA	NA
CD45 on granulocyte || id:ebi-a-GCST90001913	Crohn's disease	Inverse variance weighted	8	0.140684	0.0825632	0.088389	1.15106	0.979082	1.35325	12.3214	0.0904723	0.0554958	0.43781
CD45 on granulocyte || id:ebi-a-GCST90001913	Crohn's disease	MR Egger	8	-0.183924	0.39967	0.661585	0.831999	0.380116	1.82108	11.0498	0.0868496	NA	NA
CD45 on granulocyte || id:ebi-a-GCST90001913	Crohn's disease	Weighted median	8	0.0973822	0.0898471	0.278425	1.10228	0.9243	1.31453	NA	NA	NA	NA
CD45 on lymphocyte || id:ebi-a-GCST90001914	Crohn's disease	Inverse variance weighted	17	-0.0549348	0.0659868	0.405121	0.946547	0.831712	1.07724	31.0196	0.013379	-0.0300377	0.35824
CD45 on lymphocyte || id:ebi-a-GCST90001914	Crohn's disease	MR Egger	17	0.114914	0.191035	0.556466	1.12178	0.771426	1.63124	29.2667	0.0148582	NA	NA
CD45 on lymphocyte || id:ebi-a-GCST90001914	Crohn's disease	Weighted median	17	-0.0491737	0.0727003	0.498794	0.952016	0.825582	1.09781	NA	NA	NA	NA
CD45 on T cell || id:ebi-a-GCST90001915	Crohn's disease	Inverse variance weighted	8	0.0124322	0.0891616	0.889107	1.01251	0.850165	1.20586	10.0083	0.188103	-0.105898	0.0590706
CD45 on T cell || id:ebi-a-GCST90001915	Crohn's disease	MR Egger	8	0.618045	0.270978	0.0627313	1.8553	1.09082	3.15554	4.60425	0.595475	NA	NA
CD45 on T cell || id:ebi-a-GCST90001915	Crohn's disease	Weighted median	8	0.0323617	0.105869	0.759852	1.03289	0.839337	1.27108	NA	NA	NA	NA
CD45 on CD4+ T cell || id:ebi-a-GCST90001916	Crohn's disease	Inverse variance weighted	8	-0.189388	0.100773	0.0601967	0.827465	0.679157	1.00816	13.7781	0.055271	-0.040898	0.715276
CD45 on CD4+ T cell || id:ebi-a-GCST90001916	Crohn's disease	MR Egger	8	0.104219	0.775106	0.897438	1.10984	0.242928	5.07043	13.4502	0.0364188	NA	NA
CD45 on CD4+ T cell || id:ebi-a-GCST90001916	Crohn's disease	Weighted median	8	-0.276538	0.103336	0.0074482	0.758404	0.619355	0.928672	NA	NA	NA	NA
CD45 on CD8+ T cell || id:ebi-a-GCST90001917	Crohn's disease	Inverse variance weighted	8	0.124907	0.0717422	0.0816731	1.13304	0.984415	1.30411	7.66808	0.36277	-0.0384258	0.430654
CD45 on CD8+ T cell || id:ebi-a-GCST90001917	Crohn's disease	MR Egger	8	0.38668	0.318433	0.270245	1.47209	0.788638	2.74782	6.85307	0.334649	NA	NA
CD45 on CD8+ T cell || id:ebi-a-GCST90001917	Crohn's disease	Weighted median	8	0.169072	0.0907177	0.0623614	1.18421	0.991303	1.41465	NA	NA	NA	NA
CD45 on HLA DR+ T cell || id:ebi-a-GCST90001918	Crohn's disease	Inverse variance weighted	12	0.0274372	0.0670489	0.682385	1.02782	0.901244	1.17217	18.1144	0.0789649	-0.0839329	0.0585279
CD45 on HLA DR+ T cell || id:ebi-a-GCST90001918	Crohn's disease	MR Egger	12	0.393625	0.18115	0.0548979	1.48234	1.03933	2.1142	12.4428	0.256516	NA	NA
CD45 on HLA DR+ T cell || id:ebi-a-GCST90001918	Crohn's disease	Weighted median	12	0.0432127	0.0845277	0.609194	1.04416	0.88474	1.23231	NA	NA	NA	NA
CD45 on Natural Killer T || id:ebi-a-GCST90001919	Crohn's disease	Inverse variance weighted	11	-0.0149075	0.102895	0.884805	0.985203	0.805267	1.20535	30.0107	0.000853183	-0.0305313	0.67702
CD45 on Natural Killer T || id:ebi-a-GCST90001919	Crohn's disease	MR Egger	11	0.143584	0.383565	0.716818	1.1544	0.544328	2.44824	29.4055	0.000553465	NA	NA
CD45 on Natural Killer T || id:ebi-a-GCST90001919	Crohn's disease	Weighted median	11	-0.0468613	0.0972808	0.630011	0.95422	0.788572	1.15466	NA	NA	NA	NA
CD45 on HLA DR+ CD4+ T cell || id:ebi-a-GCST90001920	Crohn's disease	Inverse variance weighted	11	0.119862	0.0731074	0.101102	1.12734	0.976844	1.30103	17.8365	0.0577843	0.0218696	0.653787
CD45 on HLA DR+ CD4+ T cell || id:ebi-a-GCST90001920	Crohn's disease	MR Egger	11	-0.00785216	0.285688	0.978673	0.992179	0.566771	1.73689	17.4201	0.042529	NA	NA
CD45 on HLA DR+ CD4+ T cell || id:ebi-a-GCST90001920	Crohn's disease	Weighted median	11	0.104439	0.0807911	0.196113	1.11009	0.947516	1.30055	NA	NA	NA	NA
CD45 on HLA DR+ CD8+ T cell || id:ebi-a-GCST90001921	Crohn's disease	Inverse variance weighted	11	-0.0303766	0.0641472	0.635824	0.97008	0.855469	1.10005	13.7827	0.183134	-0.00018778	0.996247
CD45 on HLA DR+ CD8+ T cell || id:ebi-a-GCST90001921	Crohn's disease	MR Egger	11	-0.0292601	0.240559	0.905861	0.971164	0.606072	1.55618	13.7827	0.130267	NA	NA
CD45 on HLA DR+ CD8+ T cell || id:ebi-a-GCST90001921	Crohn's disease	Weighted median	11	0.00148144	0.0780029	0.984847	1.00148	0.8595	1.16692	NA	NA	NA	NA
CD127 on T cell || id:ebi-a-GCST90001922	Crohn's disease	Inverse variance weighted	17	-0.0185321	0.0534269	0.72869	0.981639	0.884044	1.09001	19.9964	0.220384	0.00602884	0.847216
CD127 on T cell || id:ebi-a-GCST90001922	Crohn's disease	MR Egger	17	-0.0509813	0.174462	0.774121	0.950296	0.675078	1.33772	19.9453	0.174042	NA	NA
CD127 on T cell || id:ebi-a-GCST90001922	Crohn's disease	Weighted median	17	-0.00160916	0.0707654	0.981858	0.998392	0.869089	1.14693	NA	NA	NA	NA
CD127 on CD45RA- CD4 not regulatory T cell || id:ebi-a-GCST90001923	Crohn's disease	Inverse variance weighted	12	-0.0359195	0.0572159	0.530143	0.964718	0.862377	1.0792	12.0258	0.361706	0.0309717	0.386692
CD127 on CD45RA- CD4 not regulatory T cell || id:ebi-a-GCST90001923	Crohn's disease	MR Egger	12	-0.223703	0.215341	0.323349	0.799553	0.524258	1.21941	11.1152	0.348612	NA	NA
CD127 on CD45RA- CD4 not regulatory T cell || id:ebi-a-GCST90001923	Crohn's disease	Weighted median	12	-0.0543515	0.0762354	0.475881	0.947099	0.815648	1.09974	NA	NA	NA	NA
CD127 on CD28+ CD4+ T cell || id:ebi-a-GCST90001924	Crohn's disease	Inverse variance weighted	16	-0.0155356	0.0429198	0.717375	0.984584	0.905147	1.07099	13.8667	0.535659	0.0374319	0.148454
CD127 on CD28+ CD4+ T cell || id:ebi-a-GCST90001924	Crohn's disease	MR Egger	16	-0.213459	0.136348	0.139773	0.807785	0.61835	1.05526	11.5278	0.644165	NA	NA
CD127 on CD28+ CD4+ T cell || id:ebi-a-GCST90001924	Crohn's disease	Weighted median	16	-0.0580346	0.0589336	0.324749	0.943617	0.84068	1.05916	NA	NA	NA	NA
CD127 on CD28+ CD4-CD8- T cell || id:ebi-a-GCST90001925	Crohn's disease	Inverse variance weighted	16	-0.0466372	0.0537263	0.385366	0.954434	0.859039	1.06042	14.9684	0.453695	0.00385549	0.904891
CD127 on CD28+ CD4-CD8- T cell || id:ebi-a-GCST90001925	Crohn's disease	MR Egger	16	-0.069089	0.192705	0.725301	0.933244	0.639678	1.36154	14.9526	0.381402	NA	NA
CD127 on CD28+ CD4-CD8- T cell || id:ebi-a-GCST90001925	Crohn's disease	Weighted median	16	-0.0902358	0.0745489	0.226116	0.913716	0.789503	1.05747	NA	NA	NA	NA
CD127 on granulocyte || id:ebi-a-GCST90001926	Crohn's disease	Inverse variance weighted	20	-0.00671601	0.0591529	0.909605	0.993306	0.884568	1.11541	40.1723	0.00310609	0.0560539	0.100634
CD127 on granulocyte || id:ebi-a-GCST90001926	Crohn's disease	MR Egger	20	-0.31554	0.187114	0.108982	0.729395	0.505461	1.05254	34.4417	0.0111028	NA	NA
CD127 on granulocyte || id:ebi-a-GCST90001926	Crohn's disease	Weighted median	20	-0.00280647	0.06687	0.966523	0.997197	0.874702	1.13685	NA	NA	NA	NA
CD127 on CD8+ T cell || id:ebi-a-GCST90001927	Crohn's disease	Inverse variance weighted	20	-0.0473348	0.0457886	0.301244	0.953768	0.8719	1.04332	22.9015	0.24171	0.0227034	0.38295
CD127 on CD8+ T cell || id:ebi-a-GCST90001927	Crohn's disease	MR Egger	20	-0.178924	0.15417	0.260982	0.83617	0.618105	1.13117	21.9271	0.235236	NA	NA
CD127 on CD8+ T cell || id:ebi-a-GCST90001927	Crohn's disease	Weighted median	20	-0.044276	0.0610775	0.468504	0.95669	0.848752	1.07835	NA	NA	NA	NA
CD127 on CD28+ CD45RA- CD8+ T cell || id:ebi-a-GCST90001928	Crohn's disease	Inverse variance weighted	11	0.0201586	0.0880525	0.818916	1.02036	0.858624	1.21257	22.6941	0.0119337	0.0194575	0.754435
CD127 on CD28+ CD45RA- CD8+ T cell || id:ebi-a-GCST90001928	Crohn's disease	MR Egger	11	-0.0673859	0.286708	0.819443	0.934834	0.532946	1.63978	22.4348	0.00759838	NA	NA
CD127 on CD28+ CD45RA- CD8+ T cell || id:ebi-a-GCST90001928	Crohn's disease	Weighted median	11	0.0062097	0.0886698	0.944168	1.00623	0.845706	1.19722	NA	NA	NA	NA
CD127 on CD28+ CD45RA+ CD8+ T cell || id:ebi-a-GCST90001929	Crohn's disease	Inverse variance weighted	14	-0.00751964	0.0649879	0.907884	0.992509	0.873807	1.12734	24.6762	0.0254502	-0.0347276	0.391049
CD127 on CD28+ CD45RA+ CD8+ T cell || id:ebi-a-GCST90001929	Crohn's disease	MR Egger	14	0.16562	0.205311	0.435547	1.18012	0.789158	1.76479	23.1488	0.0264889	NA	NA
CD127 on CD28+ CD45RA+ CD8+ T cell || id:ebi-a-GCST90001929	Crohn's disease	Weighted median	14	-0.0640706	0.0671735	0.340181	0.937939	0.822234	1.06993	NA	NA	NA	NA
CD127 on CD28- CD8+ T cell || id:ebi-a-GCST90001930	Crohn's disease	Inverse variance weighted	15	0.0216033	0.0511571	0.672812	1.02184	0.92435	1.12961	15.6427	0.335679	-0.0151119	0.688593
CD127 on CD28- CD8+ T cell || id:ebi-a-GCST90001930	Crohn's disease	MR Egger	15	0.115277	0.234567	0.631304	1.12218	0.708593	1.77718	15.4431	0.280511	NA	NA
CD127 on CD28- CD8+ T cell || id:ebi-a-GCST90001930	Crohn's disease	Weighted median	15	0.0231908	0.0671582	0.729857	1.02346	0.897233	1.16745	NA	NA	NA	NA
CD127 on CD4+ T cell || id:ebi-a-GCST90001931	Crohn's disease	Inverse variance weighted	7	0.0121728	0.0647588	0.850899	1.01225	0.891585	1.14924	3.56982	0.734658	0.0117354	0.818984
CD127 on CD4+ T cell || id:ebi-a-GCST90001931	Crohn's disease	MR Egger	7	-0.0521052	0.274255	0.856791	0.949229	0.554525	1.62488	3.51165	0.621626	NA	NA
CD127 on CD4+ T cell || id:ebi-a-GCST90001931	Crohn's disease	Weighted median	7	0.00706179	0.0822106	0.931547	1.00709	0.857211	1.18317	NA	NA	NA	NA
CD127 on CD45RA+ CD4+ T cell || id:ebi-a-GCST90001932	Crohn's disease	Inverse variance weighted	13	0.0185029	0.0480175	0.699987	1.01868	0.927177	1.1192	15.7049	0.205127	0.0397668	0.286324
CD127 on CD45RA+ CD4+ T cell || id:ebi-a-GCST90001932	Crohn's disease	MR Egger	13	-0.190014	0.192045	0.343721	0.826948	0.567552	1.2049	14.0958	0.22774	NA	NA
CD127 on CD45RA+ CD4+ T cell || id:ebi-a-GCST90001932	Crohn's disease	Weighted median	13	-0.052971	0.0581277	0.362145	0.948408	0.846283	1.06286	NA	NA	NA	NA
CD25 on CD45RA- CD4 not regulatory T cell || id:ebi-a-GCST90001933	Crohn's disease	Inverse variance weighted	12	0.113824	0.0641794	0.0761404	1.12056	0.988104	1.27076	20.8381	0.035088	-0.0203156	0.407187
CD25 on CD45RA- CD4 not regulatory T cell || id:ebi-a-GCST90001933	Crohn's disease	MR Egger	12	0.193554	0.112724	0.116722	1.21356	0.972987	1.5136	19.3867	0.035617	NA	NA
CD25 on CD45RA- CD4 not regulatory T cell || id:ebi-a-GCST90001933	Crohn's disease	Weighted median	12	0.172253	0.06116	0.00485598	1.18798	1.05378	1.33927	NA	NA	NA	NA
CD25 on CD45RA+ CD4 not regulatory T cell || id:ebi-a-GCST90001934	Crohn's disease	Inverse variance weighted	15	-0.0465563	0.0620043	0.452739	0.954511	0.845282	1.07785	21.7576	0.0837332	-0.00586608	0.865815
CD25 on CD45RA+ CD4 not regulatory T cell || id:ebi-a-GCST90001934	Crohn's disease	MR Egger	15	-0.0109962	0.216102	0.960191	0.989064	0.647552	1.51068	21.708	0.0600539	NA	NA
CD25 on CD45RA+ CD4 not regulatory T cell || id:ebi-a-GCST90001934	Crohn's disease	Weighted median	15	-0.0315429	0.078801	0.688947	0.968949	0.83028	1.13078	NA	NA	NA	NA
CD25 on CD39+ CD4 regulatory T cell || id:ebi-a-GCST90001935	Crohn's disease	Inverse variance weighted	11	0.0638437	0.0608712	0.294255	1.06593	0.946046	1.201	9.01843	0.530355	0.0125834	0.704617
CD25 on CD39+ CD4 regulatory T cell || id:ebi-a-GCST90001935	Crohn's disease	MR Egger	11	-0.0117669	0.20255	0.954943	0.988302	0.66447	1.46995	8.86525	0.449805	NA	NA
CD25 on CD39+ CD4 regulatory T cell || id:ebi-a-GCST90001935	Crohn's disease	Weighted median	11	0.102018	0.0869392	0.240621	1.1074	0.933903	1.31314	NA	NA	NA	NA
CD25 on CD4 regulatory T cell || id:ebi-a-GCST90001936	Crohn's disease	Inverse variance weighted	13	-0.0763281	0.0824523	0.354589	0.926512	0.788254	1.08902	26.2996	0.00973328	0.0011106	0.982858
CD25 on CD4 regulatory T cell || id:ebi-a-GCST90001936	Crohn's disease	MR Egger	13	-0.0837949	0.350452	0.81542	0.91962	0.462698	1.82776	26.2984	0.00585781	NA	NA
CD25 on CD4 regulatory T cell || id:ebi-a-GCST90001936	Crohn's disease	Weighted median	13	-0.158296	0.0830036	0.0565072	0.853597	0.725435	1.0044	NA	NA	NA	NA
CD25 on resting CD4 regulatory T cell || id:ebi-a-GCST90001937	Crohn's disease	Inverse variance weighted	14	-0.086823	0.0658206	0.18714	0.916839	0.805871	1.04309	15.2473	0.292171	0.00514685	0.882252
CD25 on resting CD4 regulatory T cell || id:ebi-a-GCST90001937	Crohn's disease	MR Egger	14	-0.117759	0.215618	0.594973	0.88891	0.582533	1.35642	15.2182	0.229717	NA	NA
CD25 on resting CD4 regulatory T cell || id:ebi-a-GCST90001937	Crohn's disease	Weighted median	14	0.0394965	0.0845657	0.640463	1.04029	0.881392	1.22783	NA	NA	NA	NA
CD25 on CD39+ resting CD4 regulatory T cell || id:ebi-a-GCST90001938	Crohn's disease	Inverse variance weighted	9	0.095263	0.0733935	0.194295	1.09995	0.952573	1.27012	4.63921	0.795349	0.058612	0.193921
CD25 on CD39+ resting CD4 regulatory T cell || id:ebi-a-GCST90001938	Crohn's disease	MR Egger	9	-0.281592	0.27236	0.335576	0.754581	0.442454	1.2869	2.57477	0.921362	NA	NA
CD25 on CD39+ resting CD4 regulatory T cell || id:ebi-a-GCST90001938	Crohn's disease	Weighted median	9	0.021933	0.0922445	0.812059	1.02218	0.853111	1.22474	NA	NA	NA	NA
CD25 on activated CD4 regulatory T cell || id:ebi-a-GCST90001939	Crohn's disease	Inverse variance weighted	12	-0.0558331	0.0709523	0.431334	0.945697	0.822917	1.0868	12.6328	0.318	0.00198332	0.968616
CD25 on activated CD4 regulatory T cell || id:ebi-a-GCST90001939	Crohn's disease	MR Egger	12	-0.0673061	0.29398	0.823524	0.934909	0.525447	1.66345	12.6308	0.245055	NA	NA
CD25 on activated CD4 regulatory T cell || id:ebi-a-GCST90001939	Crohn's disease	Weighted median	12	0.00556264	0.090362	0.950914	1.00558	0.842361	1.20042	NA	NA	NA	NA
CD25 on CD39+ activated CD4 regulatory T cell || id:ebi-a-GCST90001940	Crohn's disease	Inverse variance weighted	8	-0.162617	0.105093	0.121774	0.849917	0.691703	1.04432	16.1493	0.0237864	-0.021377	0.794965
CD25 on CD39+ activated CD4 regulatory T cell || id:ebi-a-GCST90001940	Crohn's disease	MR Egger	8	-0.0271531	0.511199	0.959363	0.973212	0.357328	2.65063	15.9531	0.0140081	NA	NA
CD25 on CD39+ activated CD4 regulatory T cell || id:ebi-a-GCST90001940	Crohn's disease	Weighted median	8	-0.118936	0.107731	0.26959	0.887864	0.718859	1.0966	NA	NA	NA	NA
CD25 on secreting CD4 regulatory T cell || id:ebi-a-GCST90001941	Crohn's disease	Inverse variance weighted	8	0.0194444	0.101281	0.847754	1.01963	0.83605	1.24353	13.8217	0.0544456	-0.00238871	0.979906
CD25 on secreting CD4 regulatory T cell || id:ebi-a-GCST90001941	Crohn's disease	MR Egger	8	0.0339218	0.562171	0.953844	1.0345	0.343718	3.11359	13.8201	0.0317118	NA	NA
CD25 on secreting CD4 regulatory T cell || id:ebi-a-GCST90001941	Crohn's disease	Weighted median	8	0.0635025	0.111113	0.567651	1.06556	0.857033	1.32483	NA	NA	NA	NA
CD25 on CD39+ secreting CD4 regulatory T cell || id:ebi-a-GCST90001942	Crohn's disease	Inverse variance weighted	8	0.0478552	0.100764	0.63484	1.04902	0.861017	1.27807	16.5841	0.0202839	0.0227706	0.75084
CD25 on CD39+ secreting CD4 regulatory T cell || id:ebi-a-GCST90001942	Crohn's disease	MR Egger	8	-0.0933015	0.438049	0.838385	0.910919	0.386015	2.14959	16.2841	0.0123075	NA	NA
CD25 on CD39+ secreting CD4 regulatory T cell || id:ebi-a-GCST90001942	Crohn's disease	Weighted median	8	0.0601894	0.09628	0.531873	1.06204	0.879396	1.28261	NA	NA	NA	NA
CD25 on activated & secreting CD4 regulatory T cell || id:ebi-a-GCST90001943	Crohn's disease	Inverse variance weighted	8	-0.0257263	0.0855742	0.763695	0.974602	0.82411	1.15258	9.17524	0.240319	-0.00050465	0.991945
CD25 on activated & secreting CD4 regulatory T cell || id:ebi-a-GCST90001943	Crohn's disease	MR Egger	8	-0.0228206	0.291191	0.940082	0.977438	0.55236	1.72964	9.17507	0.163969	NA	NA
CD25 on activated & secreting CD4 regulatory T cell || id:ebi-a-GCST90001943	Crohn's disease	Weighted median	8	-0.018229	0.103965	0.860814	0.981936	0.800916	1.20387	NA	NA	NA	NA
CD123 on plasmacytoid Dendritic Cell || id:ebi-a-GCST90001944	Crohn's disease	Inverse variance weighted	10	0.00200203	0.076977	0.979251	1.002	0.861679	1.16518	23.0671	0.00604727	0.0456735	0.364319
CD123 on plasmacytoid Dendritic Cell || id:ebi-a-GCST90001944	Crohn's disease	MR Egger	10	-0.219643	0.243069	0.392591	0.802805	0.498547	1.29275	20.6763	0.00805879	NA	NA
CD123 on plasmacytoid Dendritic Cell || id:ebi-a-GCST90001944	Crohn's disease	Weighted median	10	-0.0551574	0.0705998	0.434644	0.946336	0.824043	1.08678	NA	NA	NA	NA
CD123 on CD62L+ plasmacytoid Dendritic Cell || id:ebi-a-GCST90001945	Crohn's disease	Inverse variance weighted	10	0.00246471	0.0772846	0.974559	1.00247	0.861558	1.16642	23.0663	0.00604918	0.0461501	0.366364
CD123 on CD62L+ plasmacytoid Dendritic Cell || id:ebi-a-GCST90001945	Crohn's disease	MR Egger	10	-0.222752	0.247703	0.394769	0.800313	0.492506	1.3005	20.6948	0.00800404	NA	NA
CD123 on CD62L+ plasmacytoid Dendritic Cell || id:ebi-a-GCST90001945	Crohn's disease	Weighted median	10	-0.0550422	0.0693882	0.427632	0.946445	0.826097	1.08433	NA	NA	NA	NA
CD33 on CD14+ monocyte || id:ebi-a-GCST90001946	Crohn's disease	Inverse variance weighted	20	0.0322148	0.0209384	0.123914	1.03274	0.991214	1.076	24.471	0.178701	0.00282345	0.847615
CD33 on CD14+ monocyte || id:ebi-a-GCST90001946	Crohn's disease	MR Egger	20	0.0272378	0.0333696	0.42503	1.02761	0.962553	1.09707	24.4195	0.14176	NA	NA
CD33 on CD14+ monocyte || id:ebi-a-GCST90001946	Crohn's disease	Weighted median	20	0.0276723	0.0201867	0.170432	1.02806	0.988177	1.06955	NA	NA	NA	NA
CD33 on CD33+ HLA DR+ CD14dim || id:ebi-a-GCST90001947	Crohn's disease	Inverse variance weighted	19	0.00761438	0.0202931	0.707497	1.00764	0.968351	1.04853	24.7365	0.132348	-0.0194434	0.140623
CD33 on CD33+ HLA DR+ CD14dim || id:ebi-a-GCST90001947	Crohn's disease	MR Egger	19	0.0427309	0.0299759	0.172113	1.04366	0.984106	1.10681	21.6889	0.196981	NA	NA
CD33 on CD33+ HLA DR+ CD14dim || id:ebi-a-GCST90001947	Crohn's disease	Weighted median	19	0.0190279	0.0201594	0.345235	1.01921	0.979724	1.06029	NA	NA	NA	NA
CD33 on CD33dim HLA DR+ CD11b+ || id:ebi-a-GCST90001948	Crohn's disease	Inverse variance weighted	21	0.028895	0.0221885	0.192831	1.02932	0.985511	1.07507	28.9622	0.088506	0.000679403	0.964954
CD33 on CD33dim HLA DR+ CD11b+ || id:ebi-a-GCST90001948	Crohn's disease	MR Egger	21	0.0276473	0.0361042	0.453225	1.02803	0.957799	1.10342	28.9592	0.0666297	NA	NA
CD33 on CD33dim HLA DR+ CD11b+ || id:ebi-a-GCST90001948	Crohn's disease	Weighted median	21	0.0272223	0.0218958	0.21377	1.0276	0.984429	1.07266	NA	NA	NA	NA
CD33 on CD33dim HLA DR+ CD11b- || id:ebi-a-GCST90001949	Crohn's disease	Inverse variance weighted	20	0.0274236	0.0215385	0.202933	1.0278	0.985317	1.07212	25.9702	0.131022	0.00985079	0.514363
CD33 on CD33dim HLA DR+ CD11b- || id:ebi-a-GCST90001949	Crohn's disease	MR Egger	20	0.00868079	0.0356631	0.81044	1.00872	0.940617	1.08175	25.3471	0.11565	NA	NA
CD33 on CD33dim HLA DR+ CD11b- || id:ebi-a-GCST90001949	Crohn's disease	Weighted median	20	0.0244131	0.0220076	0.2673	1.02471	0.981452	1.06988	NA	NA	NA	NA
CD33 on Granulocytic Myeloid-Derived Suppressor Cells || id:ebi-a-GCST90001950	Crohn's disease	Inverse variance weighted	13	0.00278585	0.0224168	0.901098	1.00279	0.959684	1.04783	9.45967	0.663247	-0.0244748	0.158694
CD33 on Granulocytic Myeloid-Derived Suppressor Cells || id:ebi-a-GCST90001950	Crohn's disease	MR Egger	13	0.0612018	0.0446651	0.197929	1.06311	0.974002	1.16038	7.17323	0.784887	NA	NA
CD33 on Granulocytic Myeloid-Derived Suppressor Cells || id:ebi-a-GCST90001950	Crohn's disease	Weighted median	13	0.0202714	0.0288511	0.482293	1.02048	0.964373	1.07985	NA	NA	NA	NA
CD33 on CD66b++ myeloid cell || id:ebi-a-GCST90001951	Crohn's disease	Inverse variance weighted	13	0.0271332	0.0229696	0.237497	1.0275	0.982272	1.07482	13.8375	0.311205	-0.000750599	0.969681
CD33 on CD66b++ myeloid cell || id:ebi-a-GCST90001951	Crohn's disease	MR Egger	13	0.0285868	0.0444202	0.533052	1.029	0.9432	1.1226	13.8356	0.242224	NA	NA
CD33 on CD66b++ myeloid cell || id:ebi-a-GCST90001951	Crohn's disease	Weighted median	13	0.0278776	0.0257899	0.27972	1.02827	0.977584	1.08158	NA	NA	NA	NA
CD33 on Monocytic Myeloid-Derived Suppressor Cells || id:ebi-a-GCST90001952	Crohn's disease	Inverse variance weighted	18	0.00636404	0.0181423	0.72575	1.00638	0.971227	1.04281	12.469	0.770941	-0.0136463	0.211233
CD33 on Monocytic Myeloid-Derived Suppressor Cells || id:ebi-a-GCST90001952	Crohn's disease	MR Egger	18	0.0337123	0.0277509	0.242059	1.03429	0.979533	1.0921	10.7729	0.82328	NA	NA
CD33 on Monocytic Myeloid-Derived Suppressor Cells || id:ebi-a-GCST90001952	Crohn's disease	Weighted median	18	0.0270122	0.0211446	0.201425	1.02738	0.985672	1.07085	NA	NA	NA	NA
CD33 on CD33dim HLA DR- || id:ebi-a-GCST90001953	Crohn's disease	Inverse variance weighted	18	0.00555112	0.0211424	0.792891	1.00557	0.964748	1.04811	22.6568	0.160761	-0.0188411	0.242388
CD33 on CD33dim HLA DR- || id:ebi-a-GCST90001953	Crohn's disease	MR Egger	18	0.0366711	0.0330465	0.283536	1.03735	0.972291	1.10677	20.746	0.188481	NA	NA
CD33 on CD33dim HLA DR- || id:ebi-a-GCST90001953	Crohn's disease	Weighted median	18	0.0249945	0.0211145	0.236509	1.02531	0.983744	1.06863	NA	NA	NA	NA
CD33 on basophil || id:ebi-a-GCST90001954	Crohn's disease	Inverse variance weighted	18	0.00278984	0.0215969	0.897217	1.00279	0.961231	1.04615	23.0754	0.146812	-0.0129329	0.428127
CD33 on basophil || id:ebi-a-GCST90001954	Crohn's disease	MR Egger	18	0.0242188	0.0342138	0.489211	1.02451	0.958065	1.09557	22.1599	0.138104	NA	NA
CD33 on basophil || id:ebi-a-GCST90001954	Crohn's disease	Weighted median	18	0.0196276	0.0217315	0.366428	1.01982	0.977296	1.0642	NA	NA	NA	NA
CD33 on Immature Myeloid-Derived Suppressor Cells || id:ebi-a-GCST90001955	Crohn's disease	Inverse variance weighted	19	-0.00478482	0.0210049	0.819806	0.995227	0.955085	1.03705	22.3079	0.218601	-0.0226372	0.150113
CD33 on Immature Myeloid-Derived Suppressor Cells || id:ebi-a-GCST90001955	Crohn's disease	MR Egger	19	0.0327243	0.0321158	0.322511	1.03327	0.970229	1.1004	19.6783	0.291012	NA	NA
CD33 on Immature Myeloid-Derived Suppressor Cells || id:ebi-a-GCST90001955	Crohn's disease	Weighted median	19	0.0184657	0.0218995	0.399117	1.01864	0.975839	1.06331	NA	NA	NA	NA
CD33 on CD33+ HLA DR+ || id:ebi-a-GCST90001956	Crohn's disease	Inverse variance weighted	18	0.00667215	0.0242516	0.783223	1.00669	0.959963	1.0557	33.1419	0.0108139	-0.019603	0.253235
CD33 on CD33+ HLA DR+ || id:ebi-a-GCST90001956	Crohn's disease	MR Egger	18	0.0405365	0.0372938	0.293163	1.04137	0.967965	1.12034	30.467	0.0157262	NA	NA
CD33 on CD33+ HLA DR+ || id:ebi-a-GCST90001956	Crohn's disease	Weighted median	18	0.0209817	0.0203294	0.30203	1.0212	0.981313	1.06272	NA	NA	NA	NA
CD33 on CD33+ HLA DR+ CD14- || id:ebi-a-GCST90001957	Crohn's disease	Inverse variance weighted	17	0.0076014	0.0231839	0.743007	1.00763	0.962868	1.05447	28.2667	0.0293762	-0.019144	0.280279
CD33 on CD33+ HLA DR+ CD14- || id:ebi-a-GCST90001957	Crohn's disease	MR Egger	17	0.0390734	0.0363114	0.298902	1.03985	0.968413	1.11655	26.0849	0.03714	NA	NA
CD33 on CD33+ HLA DR+ CD14- || id:ebi-a-GCST90001957	Crohn's disease	Weighted median	17	0.0213691	0.0198799	0.282415	1.0216	0.982558	1.06219	NA	NA	NA	NA
CD4 on monocyte || id:ebi-a-GCST90001958	Crohn's disease	Inverse variance weighted	10	0.0280889	0.0668261	0.674246	1.02849	0.902226	1.17242	13.9888	0.122725	0.032114	0.413614
CD4 on monocyte || id:ebi-a-GCST90001958	Crohn's disease	MR Egger	10	-0.154436	0.222261	0.506831	0.856899	0.55429	1.32471	12.7991	0.118951	NA	NA
CD4 on monocyte || id:ebi-a-GCST90001958	Crohn's disease	Weighted median	10	-0.0130848	0.0754941	0.862398	0.987	0.851247	1.1444	NA	NA	NA	NA
CD4 on HLA DR+ CD4+ T cell || id:ebi-a-GCST90001959	Crohn's disease	Inverse variance weighted	12	0.105397	0.0719631	0.143029	1.11115	0.964978	1.27947	16.9136	0.110456	0.0714842	0.0694095
CD4 on HLA DR+ CD4+ T cell || id:ebi-a-GCST90001959	Crohn's disease	MR Egger	12	-0.319792	0.218527	0.17407	0.7263	0.473263	1.11463	11.966	0.287336	NA	NA
CD4 on HLA DR+ CD4+ T cell || id:ebi-a-GCST90001959	Crohn's disease	Weighted median	12	0.0600079	0.0806859	0.457044	1.06184	0.906525	1.24378	NA	NA	NA	NA
CD25 on CD4+ T cell || id:ebi-a-GCST90001960	Crohn's disease	Inverse variance weighted	8	0.134899	0.0919014	0.142142	1.14442	0.955779	1.37029	16.1881	0.0234527	-0.0576729	0.336374
CD25 on CD4+ T cell || id:ebi-a-GCST90001960	Crohn's disease	MR Egger	8	0.373272	0.245747	0.179584	1.45248	0.897277	2.35122	13.6963	0.0332192	NA	NA
CD25 on CD4+ T cell || id:ebi-a-GCST90001960	Crohn's disease	Weighted median	8	0.181607	0.0840994	0.0308162	1.19914	1.01691	1.41403	NA	NA	NA	NA
CD25 on CD39+ CD4+ T cell || id:ebi-a-GCST90001961	Crohn's disease	Inverse variance weighted	12	0.0536154	0.0280965	0.0563575	1.05508	0.998547	1.11481	11.5561	0.397918	-0.0306197	0.0953509
CD25 on CD39+ CD4+ T cell || id:ebi-a-GCST90001961	Crohn's disease	MR Egger	12	0.120423	0.0454695	0.0243782	1.12797	1.0318	1.23311	8.16465	0.612758	NA	NA
CD25 on CD39+ CD4+ T cell || id:ebi-a-GCST90001961	Crohn's disease	Weighted median	12	0.0819848	0.0285691	0.00410858	1.08544	1.02633	1.14795	NA	NA	NA	NA
CD25 on CD28+ CD4+ T cell || id:ebi-a-GCST90001962	Crohn's disease	Inverse variance weighted	4	-0.0301531	0.0928849	0.745462	0.970297	0.808797	1.16405	2.62134	0.453761	0.0669742	0.456378
CD25 on CD28+ CD4+ T cell || id:ebi-a-GCST90001962	Crohn's disease	MR Egger	4	-0.407964	0.422803	0.436397	0.665003	0.290353	1.52307	1.78235	0.410174	NA	NA
CD25 on CD28+ CD4+ T cell || id:ebi-a-GCST90001962	Crohn's disease	Weighted median	4	-0.00582022	0.116698	0.960223	0.994197	0.790928	1.24971	NA	NA	NA	NA
FSC-A on myeloid Dendritic Cell || id:ebi-a-GCST90001963	Crohn's disease	Inverse variance weighted	15	0.0807268	0.0503013	0.108524	1.08407	0.982295	1.1964	21.9089	0.0805064	-0.0193851	0.506703
FSC-A on myeloid Dendritic Cell || id:ebi-a-GCST90001963	Crohn's disease	MR Egger	15	0.166687	0.135935	0.241864	1.18138	0.905067	1.54206	21.1503	0.0700085	NA	NA
FSC-A on myeloid Dendritic Cell || id:ebi-a-GCST90001963	Crohn's disease	Weighted median	15	0.104397	0.0594935	0.0793	1.11004	0.987864	1.24733	NA	NA	NA	NA
FSC-A on plasmacytoid Dendritic Cell || id:ebi-a-GCST90001964	Crohn's disease	Inverse variance weighted	15	-0.0772609	0.0477992	0.106016	0.925648	0.842866	1.01656	11.1681	0.672781	-0.0668851	0.0377997
FSC-A on plasmacytoid Dendritic Cell || id:ebi-a-GCST90001964	Crohn's disease	MR Egger	15	0.300805	0.170359	0.100904	1.35095	0.967443	1.88647	5.82229	0.952382	NA	NA
FSC-A on plasmacytoid Dendritic Cell || id:ebi-a-GCST90001964	Crohn's disease	Weighted median	15	-0.0466516	0.0674901	0.489417	0.95442	0.836162	1.0894	NA	NA	NA	NA
FSC-A on monocyte || id:ebi-a-GCST90001965	Crohn's disease	Inverse variance weighted	16	0.0887872	0.0500327	0.0759666	1.09285	0.990766	1.20545	15.6945	0.402641	0.0164357	0.636912
FSC-A on monocyte || id:ebi-a-GCST90001965	Crohn's disease	MR Egger	16	0.000937989	0.189179	0.996114	1.00094	0.690835	1.45024	15.4378	0.348897	NA	NA
FSC-A on monocyte || id:ebi-a-GCST90001965	Crohn's disease	Weighted median	16	0.0955435	0.0703109	0.174187	1.10026	0.958615	1.26283	NA	NA	NA	NA
FSC-A on granulocyte || id:ebi-a-GCST90001966	Crohn's disease	Inverse variance weighted	15	-0.149808	0.0617768	0.0153091	0.860874	0.7627	0.971683	25.8147	0.0273261	0.0214971	0.505577
FSC-A on granulocyte || id:ebi-a-GCST90001966	Crohn's disease	MR Egger	15	-0.253345	0.163815	0.145966	0.7762	0.56303	1.07008	24.9163	0.0236753	NA	NA
FSC-A on granulocyte || id:ebi-a-GCST90001966	Crohn's disease	Weighted median	15	-0.170683	0.0710694	0.0163217	0.843089	0.733462	0.9691	NA	NA	NA	NA
FSC-A on CD14+ monocyte || id:ebi-a-GCST90001967	Crohn's disease	Inverse variance weighted	16	0.0183457	0.0446376	0.681078	1.01852	0.933192	1.11164	20.0856	0.168673	-0.0321111	0.0749164
FSC-A on CD14+ monocyte || id:ebi-a-GCST90001967	Crohn's disease	MR Egger	16	0.13167	0.0718148	0.0880775	1.14073	0.990954	1.31315	15.8851	0.320443	NA	NA
FSC-A on CD14+ monocyte || id:ebi-a-GCST90001967	Crohn's disease	Weighted median	16	0.061758	0.0594946	0.29925	1.0637	0.946626	1.19526	NA	NA	NA	NA
FSC-A on B cell || id:ebi-a-GCST90001968	Crohn's disease	Inverse variance weighted	13	0.00512184	0.0646906	0.936894	1.00513	0.885439	1.14101	19.6058	0.0749203	0.0137136	0.717668
FSC-A on B cell || id:ebi-a-GCST90001968	Crohn's disease	MR Egger	13	-0.0677767	0.207638	0.750234	0.934469	0.622042	1.40382	19.3635	0.0548731	NA	NA
FSC-A on B cell || id:ebi-a-GCST90001968	Crohn's disease	Weighted median	13	0.00438718	0.0713135	0.950945	1.0044	0.873378	1.15507	NA	NA	NA	NA
FSC-A on Natural Killer || id:ebi-a-GCST90001969	Crohn's disease	Inverse variance weighted	16	0.0237303	0.0550135	0.666211	1.02401	0.919343	1.1406	21.3455	0.126148	0.0354016	0.251491
FSC-A on Natural Killer || id:ebi-a-GCST90001969	Crohn's disease	MR Egger	16	-0.158768	0.161922	0.343469	0.853194	0.62118	1.17187	19.3662	0.151423	NA	NA
FSC-A on Natural Killer || id:ebi-a-GCST90001969	Crohn's disease	Weighted median	16	0.00356732	0.0669438	0.957502	1.00357	0.880168	1.14428	NA	NA	NA	NA
FSC-A on HLA DR+ Natural Killer || id:ebi-a-GCST90001970	Crohn's disease	Inverse variance weighted	12	0.0115578	0.0694275	0.867785	1.01162	0.88292	1.15909	25.4086	0.00793994	-0.0535129	0.121689
FSC-A on HLA DR+ Natural Killer || id:ebi-a-GCST90001970	Crohn's disease	MR Egger	12	0.226415	0.142354	0.142805	1.2541	0.948761	1.6577	19.758	0.0316265	NA	NA
FSC-A on HLA DR+ Natural Killer || id:ebi-a-GCST90001970	Crohn's disease	Weighted median	12	0.0906581	0.0630354	0.150374	1.09489	0.967644	1.23888	NA	NA	NA	NA
FSC-A on lymphocyte || id:ebi-a-GCST90001971	Crohn's disease	Inverse variance weighted	11	-0.0894617	0.0780557	0.251743	0.914423	0.784702	1.06559	13.8855	0.178281	-0.0390586	0.47107
FSC-A on lymphocyte || id:ebi-a-GCST90001971	Crohn's disease	MR Egger	11	0.182377	0.370038	0.633911	1.20007	0.581063	2.4785	13.0639	0.159737	NA	NA
FSC-A on lymphocyte || id:ebi-a-GCST90001971	Crohn's disease	Weighted median	11	-0.0152559	0.0888905	0.863732	0.98486	0.827388	1.1723	NA	NA	NA	NA
FSC-A on T cell || id:ebi-a-GCST90001972	Crohn's disease	Inverse variance weighted	12	-0.12362	0.0708262	0.0809143	0.883715	0.769173	1.01531	15.4788	0.161608	0.0135822	0.806188
FSC-A on T cell || id:ebi-a-GCST90001972	Crohn's disease	MR Egger	12	-0.216788	0.377138	0.578112	0.8051	0.384436	1.68607	15.3812	0.11877	NA	NA
FSC-A on T cell || id:ebi-a-GCST90001972	Crohn's disease	Weighted median	12	-0.0520709	0.0799866	0.515049	0.949262	0.811521	1.11038	NA	NA	NA	NA
FSC-A on CD4+ T cell || id:ebi-a-GCST90001973	Crohn's disease	Inverse variance weighted	13	-0.0227798	0.125668	0.856156	0.977478	0.764076	1.25048	61.7507	1.08e-08	-0.0480247	0.602157
FSC-A on CD4+ T cell || id:ebi-a-GCST90001973	Crohn's disease	MR Egger	13	0.276729	0.572894	0.63854	1.31881	0.429066	4.05358	60.1749	8.6e-09	NA	NA
FSC-A on CD4+ T cell || id:ebi-a-GCST90001973	Crohn's disease	Weighted median	13	-0.112589	0.0857927	0.189408	0.893518	0.755223	1.05714	NA	NA	NA	NA
FSC-A on CD8+ T cell || id:ebi-a-GCST90001974	Crohn's disease	Inverse variance weighted	14	0.0730913	0.0563972	0.194972	1.07583	0.963245	1.20157	9.42419	0.740206	0.0180993	0.59523
FSC-A on CD8+ T cell || id:ebi-a-GCST90001974	Crohn's disease	MR Egger	14	-0.0492258	0.231109	0.834904	0.951966	0.605198	1.49743	9.12633	0.692104	NA	NA
FSC-A on CD8+ T cell || id:ebi-a-GCST90001974	Crohn's disease	Weighted median	14	0.0192155	0.0787394	0.8072	1.0194	0.873617	1.18951	NA	NA	NA	NA
FSC-A on HLA DR+ T cell || id:ebi-a-GCST90001975	Crohn's disease	Inverse variance weighted	11	-0.0636573	0.0596625	0.285992	0.938327	0.834773	1.05473	5.68599	0.840919	0.105037	0.183471
FSC-A on HLA DR+ T cell || id:ebi-a-GCST90001975	Crohn's disease	MR Egger	11	-0.783619	0.503196	0.15383	0.45675	0.170353	1.22464	3.60968	0.935177	NA	NA
FSC-A on HLA DR+ T cell || id:ebi-a-GCST90001975	Crohn's disease	Weighted median	11	-0.0360087	0.0738471	0.625825	0.964632	0.834645	1.11486	NA	NA	NA	NA
FSC-A on Natural Killer T || id:ebi-a-GCST90001976	Crohn's disease	Inverse variance weighted	16	-0.14903	0.0582654	0.0105345	0.861544	0.768565	0.96577	17.7436	0.276385	0.0301694	0.37588
FSC-A on Natural Killer T || id:ebi-a-GCST90001976	Crohn's disease	MR Egger	16	-0.298944	0.174066	0.107932	0.741601	0.527233	1.04313	16.7432	0.270122	NA	NA
FSC-A on Natural Killer T || id:ebi-a-GCST90001976	Crohn's disease	Weighted median	16	-0.116492	0.0738569	0.114733	0.890037	0.770087	1.02867	NA	NA	NA	NA
FSC-A on HLA DR+ CD4+ T cell || id:ebi-a-GCST90001977	Crohn's disease	Inverse variance weighted	10	0.0348128	0.0677932	0.607591	1.03543	0.906593	1.18257	11.5604	0.239241	-0.00648842	0.855676
FSC-A on HLA DR+ CD4+ T cell || id:ebi-a-GCST90001977	Crohn's disease	MR Egger	10	0.0705635	0.203395	0.737595	1.07311	0.720297	1.59874	11.5096	0.17446	NA	NA
FSC-A on HLA DR+ CD4+ T cell || id:ebi-a-GCST90001977	Crohn's disease	Weighted median	10	0.0611554	0.0822792	0.45732	1.06306	0.904736	1.2491	NA	NA	NA	NA
FSC-A on HLA DR+ CD8+ T cell || id:ebi-a-GCST90001978	Crohn's disease	Inverse variance weighted	7	0.0687615	0.0854441	0.420962	1.07118	0.906006	1.26647	6.28952	0.391551	-0.0448364	0.405417
FSC-A on HLA DR+ CD8+ T cell || id:ebi-a-GCST90001978	Crohn's disease	MR Egger	7	0.372445	0.34544	0.330201	1.45128	0.737405	2.85624	5.39889	0.369161	NA	NA
FSC-A on HLA DR+ CD8+ T cell || id:ebi-a-GCST90001978	Crohn's disease	Weighted median	7	0.0189513	0.107269	0.859767	1.01913	0.825889	1.25759	NA	NA	NA	NA
CD16 on CD14- CD16+ monocyte || id:ebi-a-GCST90001979	Crohn's disease	Inverse variance weighted	13	0.0633445	0.0299127	0.0342053	1.06539	1.00473	1.12972	3.48403	0.991055	0.0121323	0.476714
CD16 on CD14- CD16+ monocyte || id:ebi-a-GCST90001979	Crohn's disease	MR Egger	13	0.0376139	0.0459847	0.43074	1.03833	0.948839	1.13626	2.94128	0.991479	NA	NA
CD16 on CD14- CD16+ monocyte || id:ebi-a-GCST90001979	Crohn's disease	Weighted median	13	0.0618839	0.035313	0.0796985	1.06384	0.992697	1.14008	NA	NA	NA	NA
CD40 on CD14+ CD16- monocyte || id:ebi-a-GCST90001980	Crohn's disease	Inverse variance weighted	16	-0.0503588	0.0307234	0.101192	0.950888	0.895318	1.00991	17.4991	0.289915	-0.0093096	0.594322
CD40 on CD14+ CD16- monocyte || id:ebi-a-GCST90001980	Crohn's disease	MR Egger	16	-0.0252298	0.0558232	0.658222	0.975086	0.874028	1.08783	17.1355	0.249029	NA	NA
CD40 on CD14+ CD16- monocyte || id:ebi-a-GCST90001980	Crohn's disease	Weighted median	16	-0.0197698	0.0372634	0.595737	0.980424	0.91137	1.05471	NA	NA	NA	NA
CD40 on CD14+ CD16+ monocyte || id:ebi-a-GCST90001981	Crohn's disease	Inverse variance weighted	10	-0.0439729	0.0275038	0.109867	0.95698	0.906757	1.00998	8.29986	0.504233	-0.00245099	0.916052
CD40 on CD14+ CD16+ monocyte || id:ebi-a-GCST90001981	Crohn's disease	MR Egger	10	-0.0385294	0.057337	0.520525	0.962203	0.859925	1.07665	8.2876	0.405893	NA	NA
CD40 on CD14+ CD16+ monocyte || id:ebi-a-GCST90001981	Crohn's disease	Weighted median	10	-0.0360946	0.0350621	0.30327	0.964549	0.90049	1.03317	NA	NA	NA	NA
CCR2 on CD14- CD16+ monocyte || id:ebi-a-GCST90001982	Crohn's disease	Inverse variance weighted	16	-0.0404499	0.0520354	0.43695	0.960357	0.86724	1.06347	12.9663	0.604901	0.0122862	0.744165
CCR2 on CD14- CD16+ monocyte || id:ebi-a-GCST90001982	Crohn's disease	MR Egger	16	-0.107067	0.206783	0.612701	0.898466	0.599079	1.34747	12.8555	0.537932	NA	NA
CCR2 on CD14- CD16+ monocyte || id:ebi-a-GCST90001982	Crohn's disease	Weighted median	16	-0.0931264	0.070377	0.185752	0.911078	0.793688	1.04583	NA	NA	NA	NA
CD14 on CD14+ CD16+ monocyte || id:ebi-a-GCST90001983	Crohn's disease	Inverse variance weighted	15	-0.0934671	0.0556055	0.0927827	0.910768	0.816724	1.01564	19.3527	0.151906	-0.0437564	0.293358
CD14 on CD14+ CD16+ monocyte || id:ebi-a-GCST90001983	Crohn's disease	MR Egger	15	0.163386	0.240964	0.509629	1.17749	0.734252	1.8883	17.7183	0.168513	NA	NA
CD14 on CD14+ CD16+ monocyte || id:ebi-a-GCST90001983	Crohn's disease	Weighted median	15	-0.0628371	0.0724352	0.385671	0.939096	0.814802	1.08235	NA	NA	NA	NA
HLA DR on CD14- CD16+ monocyte || id:ebi-a-GCST90001984	Crohn's disease	Inverse variance weighted	13	-0.169122	0.0432967	9.38e-05	0.844406	0.775704	0.919192	11.91	0.452937	0.0214127	0.353083
HLA DR on CD14- CD16+ monocyte || id:ebi-a-GCST90001984	Crohn's disease	MR Egger	13	-0.269552	0.112264	0.0351668	0.763721	0.612878	0.951691	10.9699	0.445793	NA	NA
HLA DR on CD14- CD16+ monocyte || id:ebi-a-GCST90001984	Crohn's disease	Weighted median	13	-0.185878	0.0569857	0.00110689	0.830374	0.74262	0.928498	NA	NA	NA	NA
CD40 on monocytes || id:ebi-a-GCST90001985	Crohn's disease	Inverse variance weighted	16	-0.0201329	0.0286498	0.482229	0.980068	0.926551	1.03668	18.8968	0.218451	0.0147099	0.385835
CD40 on monocytes || id:ebi-a-GCST90001985	Crohn's disease	MR Egger	16	-0.055993	0.0493623	0.275707	0.945546	0.85835	1.0416	17.8737	0.212593	NA	NA
CD40 on monocytes || id:ebi-a-GCST90001985	Crohn's disease	Weighted median	16	-0.0184208	0.0341997	0.590147	0.981748	0.918097	1.04981	NA	NA	NA	NA
CD14 on CD14+ CD16- monocyte || id:ebi-a-GCST90001986	Crohn's disease	Inverse variance weighted	13	-0.0665918	0.0542976	0.22004	0.935577	0.841125	1.04064	12.4782	0.408077	0.037737	0.189502
CD14 on CD14+ CD16- monocyte || id:ebi-a-GCST90001986	Crohn's disease	MR Egger	13	-0.265869	0.152112	0.108307	0.76654	0.568925	1.0328	10.5223	0.484109	NA	NA
CD14 on CD14+ CD16- monocyte || id:ebi-a-GCST90001986	Crohn's disease	Weighted median	13	-0.065679	0.0710341	0.355168	0.936431	0.814724	1.07632	NA	NA	NA	NA
CD64 on CD14+ CD16- monocyte || id:ebi-a-GCST90001987	Crohn's disease	Inverse variance weighted	19	-0.0148062	0.037726	0.694714	0.985303	0.915075	1.06092	25.0799	0.12273	0.0102086	0.537839
CD64 on CD14+ CD16- monocyte || id:ebi-a-GCST90001987	Crohn's disease	MR Egger	19	-0.049729	0.0675078	0.471385	0.951487	0.833564	1.08609	24.5099	0.10623	NA	NA
CD64 on CD14+ CD16- monocyte || id:ebi-a-GCST90001987	Crohn's disease	Weighted median	19	-0.00930527	0.0495006	0.85089	0.990738	0.899131	1.09168	NA	NA	NA	NA
HLA DR on CD14+ CD16- monocyte || id:ebi-a-GCST90001988	Crohn's disease	Inverse variance weighted	13	-0.00352628	0.036692	0.923437	0.99648	0.927333	1.07078	17.1564	0.143807	0.0317552	0.196831
HLA DR on CD14+ CD16- monocyte || id:ebi-a-GCST90001988	Crohn's disease	MR Egger	13	-0.0783407	0.0649536	0.253079	0.924649	0.814118	1.05019	14.6437	0.199397	NA	NA
HLA DR on CD14+ CD16- monocyte || id:ebi-a-GCST90001988	Crohn's disease	Weighted median	13	-0.0686015	0.0488395	0.160131	0.933699	0.848465	1.0275	NA	NA	NA	NA
CD40 on CD14- CD16+ monocyte || id:ebi-a-GCST90001989	Crohn's disease	Inverse variance weighted	19	-0.0288465	0.0347288	0.406187	0.971566	0.907633	1.04	35.9361	0.00719021	0.0235745	0.274033
CD40 on CD14- CD16+ monocyte || id:ebi-a-GCST90001989	Crohn's disease	MR Egger	19	-0.0857318	0.0609959	0.177875	0.91784	0.814416	1.0344	33.4241	0.00995475	NA	NA
CD40 on CD14- CD16+ monocyte || id:ebi-a-GCST90001989	Crohn's disease	Weighted median	19	-0.0304758	0.0342132	0.373058	0.969984	0.907072	1.03726	NA	NA	NA	NA
CD64 on CD14- CD16+ monocyte || id:ebi-a-GCST90001990	Crohn's disease	Inverse variance weighted	17	0.00214614	0.0506258	0.966186	1.00215	0.907483	1.10669	20.4346	0.20128	0.0183078	0.556294
CD64 on CD14- CD16+ monocyte || id:ebi-a-GCST90001990	Crohn's disease	MR Egger	17	-0.100778	0.17866	0.581039	0.904134	0.637022	1.28325	19.9529	0.173748	NA	NA
CD64 on CD14- CD16+ monocyte || id:ebi-a-GCST90001990	Crohn's disease	Weighted median	17	-0.0211283	0.0593307	0.721757	0.979093	0.871607	1.09983	NA	NA	NA	NA
HLA DR on CD14+ monocyte || id:ebi-a-GCST90001991	Crohn's disease	Inverse variance weighted	13	-0.00816813	0.0360367	0.820687	0.991865	0.924225	1.06446	16.0066	0.190934	0.0210774	0.354674
HLA DR on CD14+ monocyte || id:ebi-a-GCST90001991	Crohn's disease	MR Egger	13	-0.0612121	0.0657221	0.371649	0.940624	0.826936	1.06994	14.7543	0.194025	NA	NA
HLA DR on CD14+ monocyte || id:ebi-a-GCST90001991	Crohn's disease	Weighted median	13	-0.0148011	0.0513167	0.77302	0.985308	0.891026	1.08957	NA	NA	NA	NA
CCR2 on CD14+ CD16+ monocyte || id:ebi-a-GCST90001992	Crohn's disease	Inverse variance weighted	15	-0.0721564	0.0541301	0.182526	0.930385	0.836732	1.03452	12.7517	0.546163	0.0208736	0.423574
CCR2 on CD14+ CD16+ monocyte || id:ebi-a-GCST90001992	Crohn's disease	MR Egger	15	-0.199567	0.16343	0.243727	0.819085	0.594586	1.12835	12.069	0.521993	NA	NA
CCR2 on CD14+ CD16+ monocyte || id:ebi-a-GCST90001992	Crohn's disease	Weighted median	15	-0.0650415	0.0745847	0.383181	0.937029	0.80959	1.08453	NA	NA	NA	NA
PDL-1 on CD14+ CD16- monocyte || id:ebi-a-GCST90001993	Crohn's disease	Inverse variance weighted	9	-0.0461669	0.0774375	0.551053	0.954883	0.820416	1.11139	4.57776	0.801604	-0.0136052	0.78604
PDL-1 on CD14+ CD16- monocyte || id:ebi-a-GCST90001993	Crohn's disease	MR Egger	9	0.0383536	0.309478	0.904854	1.0391	0.566531	1.90585	4.49819	0.720935	NA	NA
PDL-1 on CD14+ CD16- monocyte || id:ebi-a-GCST90001993	Crohn's disease	Weighted median	9	-0.0981172	0.101054	0.331581	0.906543	0.743651	1.10511	NA	NA	NA	NA
CX3CR1 on CD14- CD16- || id:ebi-a-GCST90001994	Crohn's disease	Inverse variance weighted	10	-0.0702241	0.0974255	0.471034	0.932185	0.770144	1.12832	34.3677	7.7e-05	0.0525967	0.289669
CX3CR1 on CD14- CD16- || id:ebi-a-GCST90001994	Crohn's disease	MR Egger	10	-0.306176	0.22913	0.218224	0.736257	0.469883	1.15364	29.609	0.000247787	NA	NA
CX3CR1 on CD14- CD16- || id:ebi-a-GCST90001994	Crohn's disease	Weighted median	10	-0.10463	0.0743427	0.159309	0.900658	0.778535	1.04194	NA	NA	NA	NA
CX3CR1 on monocyte || id:ebi-a-GCST90001995	Crohn's disease	Inverse variance weighted	20	0.00232114	0.0328824	0.943725	1.00232	0.939762	1.06905	17.2092	0.575695	-0.0157844	0.38491
CX3CR1 on monocyte || id:ebi-a-GCST90001995	Crohn's disease	MR Egger	20	0.0644401	0.0771142	0.41431	1.06656	0.916949	1.24059	16.4161	0.56353	NA	NA
CX3CR1 on monocyte || id:ebi-a-GCST90001995	Crohn's disease	Weighted median	20	0.0254753	0.0500289	0.610604	1.0258	0.92999	1.13149	NA	NA	NA	NA
CX3CR1 on CD14+ CD16+ monocyte || id:ebi-a-GCST90001996	Crohn's disease	Inverse variance weighted	19	0.0107759	0.0383511	0.778725	1.01083	0.937637	1.08975	23.9181	0.157729	-0.0343907	0.119981
CX3CR1 on CD14+ CD16+ monocyte || id:ebi-a-GCST90001996	Crohn's disease	MR Egger	19	0.138634	0.0862831	0.126525	1.1487	0.969979	1.36036	20.6608	0.241832	NA	NA
CX3CR1 on CD14+ CD16+ monocyte || id:ebi-a-GCST90001996	Crohn's disease	Weighted median	19	0.0739304	0.048311	0.125942	1.07673	0.979455	1.18367	NA	NA	NA	NA
CX3CR1 on CD14+ CD16- monocyte || id:ebi-a-GCST90001997	Crohn's disease	Inverse variance weighted	19	0.0163614	0.0338678	0.629027	1.0165	0.951211	1.08626	21.8461	0.238888	-0.0162746	0.39066
CX3CR1 on CD14+ CD16- monocyte || id:ebi-a-GCST90001997	Crohn's disease	MR Egger	19	0.077376	0.0771949	0.330231	1.08045	0.928741	1.25694	20.8925	0.231136	NA	NA
CX3CR1 on CD14+ CD16- monocyte || id:ebi-a-GCST90001997	Crohn's disease	Weighted median	19	0.0284881	0.0468773	0.543375	1.0289	0.938576	1.12791	NA	NA	NA	NA
PDL-1 on CD14+ CD16+ monocyte || id:ebi-a-GCST90001998	Crohn's disease	Inverse variance weighted	20	-0.0660786	0.0504088	0.189907	0.936057	0.847996	1.03326	22.9788	0.238277	-0.0530338	0.14653
PDL-1 on CD14+ CD16+ monocyte || id:ebi-a-GCST90001998	Crohn's disease	MR Egger	20	0.245483	0.211036	0.259926	1.27824	0.845229	1.93308	20.3727	0.31223	NA	NA
PDL-1 on CD14+ CD16+ monocyte || id:ebi-a-GCST90001998	Crohn's disease	Weighted median	20	-0.0476236	0.0704989	0.499344	0.953493	0.830438	1.09478	NA	NA	NA	NA
PDL-1 on CD14- CD16+ monocyte || id:ebi-a-GCST90001999	Crohn's disease	Inverse variance weighted	13	0.0555207	0.0454007	0.221366	1.05709	0.967089	1.15547	12.2714	0.424135	-0.0316525	0.210672
PDL-1 on CD14- CD16+ monocyte || id:ebi-a-GCST90001999	Crohn's disease	MR Egger	13	0.179034	0.103197	0.110654	1.19606	0.977037	1.46419	10.5045	0.485659	NA	NA
PDL-1 on CD14- CD16+ monocyte || id:ebi-a-GCST90001999	Crohn's disease	Weighted median	13	0.121482	0.061386	0.0478179	1.12917	1.00117	1.27354	NA	NA	NA	NA
PDL-1 on CD14- CD16- || id:ebi-a-GCST90002000	Crohn's disease	Inverse variance weighted	18	0.014561	0.0628395	0.816758	1.01467	0.897085	1.14766	23.4619	0.13481	-0.0147955	0.660715
PDL-1 on CD14- CD16- || id:ebi-a-GCST90002000	Crohn's disease	MR Egger	18	0.10306	0.208095	0.627155	1.10856	0.737266	1.66683	23.1722	0.109208	NA	NA
PDL-1 on CD14- CD16- || id:ebi-a-GCST90002000	Crohn's disease	Weighted median	18	0.0587944	0.0745624	0.430389	1.06056	0.916358	1.22745	NA	NA	NA	NA
CD64 on CD14- CD16- || id:ebi-a-GCST90002001	Crohn's disease	Inverse variance weighted	12	-0.0512365	0.0905186	0.571371	0.950054	0.795605	1.13449	34.1634	0.000340096	0.0893198	0.0501049
CD64 on CD14- CD16- || id:ebi-a-GCST90002001	Crohn's disease	MR Egger	12	-0.504218	0.21772	0.0430725	0.603978	0.394179	0.925439	22.8379	0.0113611	NA	NA
CD64 on CD14- CD16- || id:ebi-a-GCST90002001	Crohn's disease	Weighted median	12	-0.0390069	0.086402	0.65166	0.961744	0.811919	1.13922	NA	NA	NA	NA
PDL-1 on monocyte || id:ebi-a-GCST90002002	Crohn's disease	Inverse variance weighted	10	0.053749	0.06074	0.376208	1.05522	0.936785	1.18863	9.3531	0.405339	-0.0495795	0.128231
PDL-1 on monocyte || id:ebi-a-GCST90002002	Crohn's disease	MR Egger	10	0.299819	0.156807	0.0922424	1.34961	0.992506	1.83521	6.47499	0.594183	NA	NA
PDL-1 on monocyte || id:ebi-a-GCST90002002	Crohn's disease	Weighted median	10	0.00223182	0.0813233	0.978106	1.00223	0.854566	1.17542	NA	NA	NA	NA
CCR2 on CD14- CD16- || id:ebi-a-GCST90002003	Crohn's disease	Inverse variance weighted	9	0.0113541	0.0769432	0.882686	1.01142	0.869833	1.17605	10.4788	0.233013	-0.012437	0.81745
CCR2 on CD14- CD16- || id:ebi-a-GCST90002003	Crohn's disease	MR Egger	9	0.0853321	0.319348	0.797011	1.08908	0.582404	2.03654	10.3935	0.167348	NA	NA
CCR2 on CD14- CD16- || id:ebi-a-GCST90002003	Crohn's disease	Weighted median	9	-0.0461546	0.0946808	0.625921	0.954894	0.793161	1.14961	NA	NA	NA	NA
CCR2 on CD14+ CD16- monocyte || id:ebi-a-GCST90002004	Crohn's disease	Inverse variance weighted	15	-0.0181656	0.0499441	0.716068	0.981998	0.890425	1.08299	17.7082	0.220395	-0.0081959	0.751764
CCR2 on CD14+ CD16- monocyte || id:ebi-a-GCST90002004	Crohn's disease	MR Egger	15	0.0261253	0.146483	0.861197	1.02647	0.770296	1.36784	17.5671	0.174657	NA	NA
CCR2 on CD14+ CD16- monocyte || id:ebi-a-GCST90002004	Crohn's disease	Weighted median	15	-0.0315328	0.0633744	0.618792	0.968959	0.855776	1.09711	NA	NA	NA	NA
CD16 on CD14+ CD16+ monocyte || id:ebi-a-GCST90002005	Crohn's disease	Inverse variance weighted	18	0.00908097	0.0349861	0.795204	1.00912	0.942243	1.08075	18.166	0.378443	-0.0436463	0.00620268
CD16 on CD14+ CD16+ monocyte || id:ebi-a-GCST90002005	Crohn's disease	MR Egger	18	0.147468	0.0554638	0.0171576	1.1589	1.03952	1.29198	8.2471	0.941167	NA	NA
CD16 on CD14+ CD16+ monocyte || id:ebi-a-GCST90002005	Crohn's disease	Weighted median	18	0.0670401	0.0425553	0.115172	1.06934	0.983765	1.16236	NA	NA	NA	NA
CD64 on monocyte || id:ebi-a-GCST90002006	Crohn's disease	Inverse variance weighted	16	0.030995	0.0478301	0.516971	1.03148	0.939176	1.13286	29.645	0.0132678	0.0531957	0.0167451
CD64 on monocyte || id:ebi-a-GCST90002006	Crohn's disease	MR Egger	16	-0.151845	0.0783557	0.0730732	0.859121	0.736812	1.00173	19.4183	0.149574	NA	NA
CD64 on monocyte || id:ebi-a-GCST90002006	Crohn's disease	Weighted median	16	0.0041992	0.0542825	0.938339	1.00421	0.902854	1.11694	NA	NA	NA	NA
HLA DR on CD14+ CD16+ monocyte || id:ebi-a-GCST90002007	Crohn's disease	Inverse variance weighted	8	-0.0938557	0.0683553	0.169735	0.910414	0.796258	1.04094	6.60512	0.471118	-0.0494021	0.236812
HLA DR on CD14+ CD16+ monocyte || id:ebi-a-GCST90002007	Crohn's disease	MR Egger	8	0.150498	0.198113	0.476235	1.16241	0.788358	1.71395	4.87824	0.559522	NA	NA
HLA DR on CD14+ CD16+ monocyte || id:ebi-a-GCST90002007	Crohn's disease	Weighted median	8	-0.144315	0.0999001	0.148573	0.865615	0.711686	1.05284	NA	NA	NA	NA
CCR2 on monocyte || id:ebi-a-GCST90002008	Crohn's disease	Inverse variance weighted	11	-0.0378901	0.0574927	0.509868	0.962819	0.860212	1.07766	6.87122	0.737544	-0.0160829	0.634107
CCR2 on monocyte || id:ebi-a-GCST90002008	Crohn's disease	MR Egger	11	0.0434446	0.174845	0.809344	1.0444	0.741373	1.47129	6.62859	0.675725	NA	NA
CCR2 on monocyte || id:ebi-a-GCST90002008	Crohn's disease	Weighted median	11	-0.0427722	0.0811945	0.598341	0.95813	0.817166	1.12341	NA	NA	NA	NA
HLA DR on CD14- CD16- || id:ebi-a-GCST90002009	Crohn's disease	Inverse variance weighted	12	-0.0604227	0.0606942	0.31948	0.941367	0.835785	1.06029	35.341	0.000217665	0.0614831	0.00986787
HLA DR on CD14- CD16- || id:ebi-a-GCST90002009	Crohn's disease	MR Egger	12	-0.224617	0.0684653	0.00827843	0.798822	0.698507	0.913542	17.5878	0.0623273	NA	NA
HLA DR on CD14- CD16- || id:ebi-a-GCST90002009	Crohn's disease	Weighted median	12	-0.133314	0.0412727	0.00123753	0.87519	0.80718	0.94893	NA	NA	NA	NA
HLA DR on monocyte || id:ebi-a-GCST90002010	Crohn's disease	Inverse variance weighted	10	0.00585302	0.080341	0.941924	1.00587	0.859319	1.17741	49.3406	1.43e-07	0.0284864	0.590906
HLA DR on monocyte || id:ebi-a-GCST90002010	Crohn's disease	MR Egger	10	-0.0690905	0.157819	0.673124	0.933242	0.684945	1.27155	47.4804	1.24e-07	NA	NA
HLA DR on monocyte || id:ebi-a-GCST90002010	Crohn's disease	Weighted median	10	-0.0138685	0.0585687	0.81282	0.986227	0.87927	1.10619	NA	NA	NA	NA
CD64 on CD14+ CD16+ monocyte || id:ebi-a-GCST90002011	Crohn's disease	Inverse variance weighted	7	0.117935	0.131928	0.371356	1.12517	0.868799	1.4572	20.6251	0.00214181	-0.00174045	0.98226
CD64 on CD14+ CD16+ monocyte || id:ebi-a-GCST90002011	Crohn's disease	MR Egger	7	0.128608	0.479053	0.799067	1.13724	0.444709	2.90825	20.6229	0.000954279	NA	NA
CD64 on CD14+ CD16+ monocyte || id:ebi-a-GCST90002011	Crohn's disease	Weighted median	7	0.191356	0.106478	0.072313	1.21089	0.982809	1.4919	NA	NA	NA	NA
CX3CR1 on CD14- CD16+ monocyte || id:ebi-a-GCST90002012	Crohn's disease	Inverse variance weighted	18	-0.0141619	0.0479839	0.767887	0.985938	0.897439	1.08316	17.7101	0.407344	-0.0627183	0.0343095
CX3CR1 on CD14- CD16+ monocyte || id:ebi-a-GCST90002012	Crohn's disease	MR Egger	18	0.369945	0.172544	0.0477341	1.44765	1.03227	2.03019	12.357	0.719059	NA	NA
CX3CR1 on CD14- CD16+ monocyte || id:ebi-a-GCST90002012	Crohn's disease	Weighted median	18	-0.0790661	0.0726717	0.276599	0.923979	0.801314	1.06542	NA	NA	NA	NA
CCR2 on myeloid Dendritic Cell || id:ebi-a-GCST90002013	Crohn's disease	Inverse variance weighted	8	0.121252	0.068121	0.0750851	1.12891	0.987809	1.29016	12.3823	0.0886674	-0.00958211	0.805207
CCR2 on myeloid Dendritic Cell || id:ebi-a-GCST90002013	Crohn's disease	MR Egger	8	0.157496	0.158513	0.358792	1.17058	0.857966	1.59709	12.2467	0.0566865	NA	NA
CCR2 on myeloid Dendritic Cell || id:ebi-a-GCST90002013	Crohn's disease	Weighted median	8	0.117966	0.0727846	0.105069	1.12521	0.975611	1.29774	NA	NA	NA	NA
CCR2 on CD62L+ myeloid Dendritic Cell || id:ebi-a-GCST90002014	Crohn's disease	Inverse variance weighted	10	-0.0470802	0.0643655	0.464504	0.954011	0.840939	1.08229	18.5162	0.0296355	-0.000633046	0.986055
CCR2 on CD62L+ myeloid Dendritic Cell || id:ebi-a-GCST90002014	Crohn's disease	MR Egger	10	-0.0444619	0.160449	0.788721	0.956512	0.698415	1.30999	18.5155	0.0176771	NA	NA
CCR2 on CD62L+ myeloid Dendritic Cell || id:ebi-a-GCST90002014	Crohn's disease	Weighted median	10	-0.0692874	0.0646934	0.284164	0.933058	0.821941	1.0592	NA	NA	NA	NA
CCR2 on plasmacytoid Dendritic Cell || id:ebi-a-GCST90002015	Crohn's disease	Inverse variance weighted	15	0.0124221	0.0570664	0.82768	1.0125	0.905355	1.13232	32.2937	0.00363809	-0.0692141	0.0022834
CCR2 on plasmacytoid Dendritic Cell || id:ebi-a-GCST90002015	Crohn's disease	MR Egger	15	0.324225	0.0920116	0.0037399	1.38296	1.15475	1.65627	15.3753	0.284515	NA	NA
CCR2 on plasmacytoid Dendritic Cell || id:ebi-a-GCST90002015	Crohn's disease	Weighted median	15	0.0107043	0.0634035	0.865931	1.01076	0.892645	1.14451	NA	NA	NA	NA
CCR2 on CD62L+ plasmacytoid Dendritic Cell || id:ebi-a-GCST90002016	Crohn's disease	Inverse variance weighted	14	0.01507	0.0602934	0.802631	1.01518	0.902032	1.14253	32.1663	0.00226965	-0.0732909	0.00260541
CCR2 on CD62L+ plasmacytoid Dendritic Cell || id:ebi-a-GCST90002016	Crohn's disease	MR Egger	14	0.337171	0.0950904	0.00402763	1.40098	1.16276	1.68801	14.667	0.260155	NA	NA
CCR2 on CD62L+ plasmacytoid Dendritic Cell || id:ebi-a-GCST90002016	Crohn's disease	Weighted median	14	0.0483078	0.0665476	0.467892	1.04949	0.921156	1.19571	NA	NA	NA	NA
CCR2 on monocyte || id:ebi-a-GCST90002017	Crohn's disease	Inverse variance weighted	11	-0.00604668	0.0479605	0.899671	0.993972	0.904793	1.09194	12.9937	0.224024	0.0352452	0.318731
CCR2 on monocyte || id:ebi-a-GCST90002017	Crohn's disease	MR Egger	11	-0.158872	0.152449	0.324534	0.853106	0.632755	1.15019	11.5626	0.239107	NA	NA
CCR2 on monocyte || id:ebi-a-GCST90002017	Crohn's disease	Weighted median	11	-0.00139542	0.0616663	0.981947	0.998606	0.884917	1.1269	NA	NA	NA	NA
CCR2 on granulocyte || id:ebi-a-GCST90002018	Crohn's disease	Inverse variance weighted	12	-0.0830052	0.0778709	0.286453	0.920346	0.790071	1.0721	23.1975	0.0165752	0.0849955	0.110771
CCR2 on granulocyte || id:ebi-a-GCST90002018	Crohn's disease	MR Egger	12	-0.53596	0.268588	0.0739436	0.585107	0.345628	0.990518	17.7612	0.0591274	NA	NA
CCR2 on granulocyte || id:ebi-a-GCST90002018	Crohn's disease	Weighted median	12	-0.0349263	0.0855477	0.683078	0.965677	0.816605	1.14196	NA	NA	NA	NA
CD14 on Monocytic Myeloid-Derived Suppressor Cells || id:ebi-a-GCST90002019	Crohn's disease	Inverse variance weighted	18	0.0273039	0.0310658	0.379452	1.02768	0.966973	1.0922	8.76983	0.947207	0.0148459	0.588062
CD14 on Monocytic Myeloid-Derived Suppressor Cells || id:ebi-a-GCST90002019	Crohn's disease	MR Egger	18	-0.0269097	0.102879	0.796992	0.973449	0.795685	1.19093	8.46427	0.933829	NA	NA
CD14 on Monocytic Myeloid-Derived Suppressor Cells || id:ebi-a-GCST90002019	Crohn's disease	Weighted median	18	0.0263121	0.0411821	0.522875	1.02666	0.947049	1.11297	NA	NA	NA	NA
CD14 on CD33+ HLA DR+ CD14dim || id:ebi-a-GCST90002020	Crohn's disease	Inverse variance weighted	13	-0.00857409	0.0779464	0.912409	0.991463	0.850995	1.15512	45.3723	8.9e-06	-0.0588205	0.396788
CD14 on CD33+ HLA DR+ CD14dim || id:ebi-a-GCST90002020	Crohn's disease	MR Egger	13	0.235765	0.28807	0.430485	1.26588	0.719749	2.22639	42.3773	1.39e-05	NA	NA
CD14 on CD33+ HLA DR+ CD14dim || id:ebi-a-GCST90002020	Crohn's disease	Weighted median	13	0.0747525	0.0541918	0.167769	1.07762	0.969026	1.19838	NA	NA	NA	NA
CD14 on CD33dim HLA DR+ CD11b+ || id:ebi-a-GCST90002021	Crohn's disease	Inverse variance weighted	12	0.0841424	0.036422	0.0208766	1.08778	1.01284	1.16828	6.49035	0.838729	0.00246807	0.943722
CD14 on CD33dim HLA DR+ CD11b+ || id:ebi-a-GCST90002021	Crohn's disease	MR Egger	12	0.0747669	0.134544	0.590627	1.07763	0.827837	1.4028	6.48511	0.772994	NA	NA
CD14 on CD33dim HLA DR+ CD11b+ || id:ebi-a-GCST90002021	Crohn's disease	Weighted median	12	0.0864804	0.0501184	0.0844331	1.09033	0.988317	1.20287	NA	NA	NA	NA
CD4 on CD4+ T cell || id:ebi-a-GCST90002022	Crohn's disease	Inverse variance weighted	18	-0.0566575	0.0385576	0.141717	0.944918	0.876139	1.0191	20.2757	0.260373	0.0178307	0.439941
CD4 on CD4+ T cell || id:ebi-a-GCST90002022	Crohn's disease	MR Egger	18	-0.141975	0.114561	0.233108	0.867643	0.693145	1.08607	19.5107	0.243069	NA	NA
CD4 on CD4+ T cell || id:ebi-a-GCST90002022	Crohn's disease	Weighted median	18	-0.0147644	0.0498106	0.766917	0.985344	0.893693	1.08639	NA	NA	NA	NA
CD4 on Central Memory CD4+ T cell || id:ebi-a-GCST90002023	Crohn's disease	Inverse variance weighted	11	-0.058851	0.061399	0.33781	0.942847	0.835945	1.06342	19.9838	0.0294061	0.0467474	0.26271
CD4 on Central Memory CD4+ T cell || id:ebi-a-GCST90002023	Crohn's disease	MR Egger	11	-0.282085	0.196278	0.184511	0.75421	0.513354	1.10807	17.2481	0.0449695	NA	NA
CD4 on Central Memory CD4+ T cell || id:ebi-a-GCST90002023	Crohn's disease	Weighted median	11	-0.00777199	0.0669245	0.907549	0.992258	0.870277	1.13134	NA	NA	NA	NA
CD4 on naive CD4+ T cell || id:ebi-a-GCST90002024	Crohn's disease	Inverse variance weighted	13	0.0225936	0.0543491	0.677621	1.02285	0.919495	1.13782	17.1549	0.143862	0.05774	0.119423
CD4 on naive CD4+ T cell || id:ebi-a-GCST90002024	Crohn's disease	MR Egger	13	-0.290055	0.191947	0.15894	0.748222	0.51362	1.08998	13.6238	0.254515	NA	NA
CD4 on naive CD4+ T cell || id:ebi-a-GCST90002024	Crohn's disease	Weighted median	13	-0.0208912	0.0664808	0.753336	0.979326	0.859681	1.11562	NA	NA	NA	NA
CD4 on Effector Memory CD4+ T cell || id:ebi-a-GCST90002025	Crohn's disease	Inverse variance weighted	14	0.117974	0.0501703	0.0186991	1.12522	1.01983	1.24148	17.9647	0.158864	0.0392729	0.142853
CD4 on Effector Memory CD4+ T cell || id:ebi-a-GCST90002025	Crohn's disease	MR Egger	14	-0.0910704	0.14155	0.532081	0.912953	0.691765	1.20487	14.9098	0.246407	NA	NA
CD4 on Effector Memory CD4+ T cell || id:ebi-a-GCST90002025	Crohn's disease	Weighted median	14	0.0546527	0.0620849	0.378702	1.05617	0.935164	1.19284	NA	NA	NA	NA
CD4 on Terminally Differentiated CD4+ T cell || id:ebi-a-GCST90002026	Crohn's disease	Inverse variance weighted	19	0.0226305	0.0581112	0.696955	1.02289	0.912774	1.14629	34.2653	0.0116781	-0.0490458	0.153184
CD4 on Terminally Differentiated CD4+ T cell || id:ebi-a-GCST90002026	Crohn's disease	MR Egger	19	0.302992	0.195748	0.140068	1.3539	0.922494	1.98706	30.2827	0.024377	NA	NA
CD4 on Terminally Differentiated CD4+ T cell || id:ebi-a-GCST90002026	Crohn's disease	Weighted median	19	0.0203486	0.0712184	0.775092	1.02056	0.887595	1.17344	NA	NA	NA	NA
CD4 on CD45RA+ CD4+ T cell || id:ebi-a-GCST90002027	Crohn's disease	Inverse variance weighted	16	-0.0481666	0.0420392	0.251896	0.952975	0.877601	1.03482	18.2372	0.250399	0.00947244	0.712131
CD4 on CD45RA+ CD4+ T cell || id:ebi-a-GCST90002027	Crohn's disease	MR Egger	16	-0.0923306	0.125013	0.47237	0.911804	0.713655	1.16497	18.0544	0.204316	NA	NA
CD4 on CD45RA+ CD4+ T cell || id:ebi-a-GCST90002027	Crohn's disease	Weighted median	16	0.00142076	0.0560803	0.979788	1.00142	0.897182	1.11777	NA	NA	NA	NA
CD19 on B cell || id:ebi-a-GCST90002028	Crohn's disease	Inverse variance weighted	15	-0.261182	0.13808	0.0585539	0.770141	0.587536	1.0095	101.599	2.34e-15	-0.00166904	0.984263
CD19 on B cell || id:ebi-a-GCST90002028	Crohn's disease	MR Egger	15	-0.250802	0.535751	0.647442	0.778177	0.272294	2.22392	101.595	8.14e-16	NA	NA
CD19 on B cell || id:ebi-a-GCST90002028	Crohn's disease	Weighted median	15	-0.046662	0.0912053	0.608921	0.95441	0.798177	1.14122	NA	NA	NA	NA
CD39 on CD39+ CD8+ T cell || id:ebi-a-GCST90002029	Crohn's disease	Inverse variance weighted	20	-0.063884	0.0488285	0.19076	0.938114	0.852495	1.03233	22.6311	0.253981	0.0238954	0.483533
CD39 on CD39+ CD8+ T cell || id:ebi-a-GCST90002029	Crohn's disease	MR Egger	20	-0.187457	0.179675	0.310613	0.829064	0.58297	1.17905	22.0054	0.231746	NA	NA
CD39 on CD39+ CD8+ T cell || id:ebi-a-GCST90002029	Crohn's disease	Weighted median	20	-0.072838	0.0644067	0.258094	0.929751	0.819488	1.05485	NA	NA	NA	NA
CD39 on CD39+ activated CD4 regulatory T cell || id:ebi-a-GCST90002030	Crohn's disease	Inverse variance weighted	15	-0.00839598	0.047703	0.86029	0.991639	0.903125	1.08883	73.6449	4.19e-10	0.057227	0.0607107
CD39 on CD39+ activated CD4 regulatory T cell || id:ebi-a-GCST90002030	Crohn's disease	MR Egger	15	-0.115293	0.0675292	0.11152	0.891105	0.780633	1.01721	55.6071	3.16e-07	NA	NA
CD39 on CD39+ activated CD4 regulatory T cell || id:ebi-a-GCST90002030	Crohn's disease	Weighted median	15	-0.0368768	0.0243786	0.130363	0.963795	0.918826	1.01096	NA	NA	NA	NA
CD39 on CD39+ secreting CD4 regulatory T cell || id:ebi-a-GCST90002031	Crohn's disease	Inverse variance weighted	15	8.89e-05	0.0358404	0.99802	1.00009	0.932246	1.07287	13.7419	0.469114	0.032332	0.138252
CD39 on CD39+ secreting CD4 regulatory T cell || id:ebi-a-GCST90002031	Crohn's disease	MR Egger	15	-0.133944	0.0921198	0.169654	0.874639	0.730154	1.04771	11.2473	0.590112	NA	NA
CD39 on CD39+ secreting CD4 regulatory T cell || id:ebi-a-GCST90002031	Crohn's disease	Weighted median	15	-0.0030735	0.0484219	0.94939	0.996931	0.906667	1.09618	NA	NA	NA	NA
CD39 on CD39+ CD4+ T cell || id:ebi-a-GCST90002032	Crohn's disease	Inverse variance weighted	18	-0.0228234	0.042018	0.587005	0.977435	0.900164	1.06134	27.7557	0.0478745	-0.00772872	0.767463
CD39 on CD39+ CD4+ T cell || id:ebi-a-GCST90002032	Crohn's disease	MR Egger	18	0.0110305	0.120559	0.928236	1.01109	0.798304	1.2806	27.5997	0.0352799	NA	NA
CD39 on CD39+ CD4+ T cell || id:ebi-a-GCST90002032	Crohn's disease	Weighted median	18	-0.00423659	0.0493381	0.931571	0.995772	0.903988	1.09688	NA	NA	NA	NA
CD39 on granulocyte || id:ebi-a-GCST90002033	Crohn's disease	Inverse variance weighted	20	-0.0589049	0.0409563	0.150366	0.942796	0.870072	1.0216	21.4694	0.311455	0.0304098	0.339114
CD39 on granulocyte || id:ebi-a-GCST90002033	Crohn's disease	MR Egger	20	-0.212444	0.161638	0.205241	0.808606	0.589044	1.11001	20.3776	0.311965	NA	NA
CD39 on granulocyte || id:ebi-a-GCST90002033	Crohn's disease	Weighted median	20	-0.0565355	0.051806	0.275144	0.945033	0.853786	1.04603	NA	NA	NA	NA
CD39 on monocyte || id:ebi-a-GCST90002034	Crohn's disease	Inverse variance weighted	10	0.046481	0.0584365	0.426375	1.04758	0.93421	1.1747	9.91839	0.357132	0.0339838	0.466508
CD39 on monocyte || id:ebi-a-GCST90002034	Crohn's disease	MR Egger	10	-0.139878	0.250996	0.592574	0.869464	0.531618	1.42201	9.24308	0.322207	NA	NA
CD39 on monocyte || id:ebi-a-GCST90002034	Crohn's disease	Weighted median	10	0.104709	0.0766378	0.17185	1.11039	0.955519	1.29036	NA	NA	NA	NA
CD80 on myeloid Dendritic Cell || id:ebi-a-GCST90002035	Crohn's disease	Inverse variance weighted	21	-0.0983754	0.0566977	0.0827257	0.906309	0.810987	1.01283	40.0026	0.00499167	0.00736286	0.806605
CD80 on myeloid Dendritic Cell || id:ebi-a-GCST90002035	Crohn's disease	MR Egger	21	-0.136696	0.164927	0.417492	0.872235	0.631314	1.2051	39.8732	0.0034	NA	NA
CD80 on myeloid Dendritic Cell || id:ebi-a-GCST90002035	Crohn's disease	Weighted median	21	-0.0589346	0.0598795	0.325007	0.942768	0.838368	1.06017	NA	NA	NA	NA
CD80 on CD62L+ myeloid Dendritic Cell || id:ebi-a-GCST90002036	Crohn's disease	Inverse variance weighted	15	-0.0769965	0.0704697	0.274561	0.925893	0.806447	1.06303	29.8748	0.00794061	0.00589214	0.862747
CD80 on CD62L+ myeloid Dendritic Cell || id:ebi-a-GCST90002036	Crohn's disease	MR Egger	15	-0.107598	0.188285	0.577432	0.897989	0.620869	1.2988	29.8035	0.00502647	NA	NA
CD80 on CD62L+ myeloid Dendritic Cell || id:ebi-a-GCST90002036	Crohn's disease	Weighted median	15	-0.0357364	0.0751874	0.634575	0.964895	0.832682	1.1181	NA	NA	NA	NA
CD80 on plasmacytoid Dendritic Cell || id:ebi-a-GCST90002037	Crohn's disease	Inverse variance weighted	15	-0.0655033	0.052658	0.213522	0.936596	0.844751	1.03843	22.3415	0.071864	-0.00203349	0.951703
CD80 on plasmacytoid Dendritic Cell || id:ebi-a-GCST90002037	Crohn's disease	MR Egger	15	-0.054856	0.180881	0.766483	0.946621	0.664059	1.34942	22.335	0.050384	NA	NA
CD80 on plasmacytoid Dendritic Cell || id:ebi-a-GCST90002037	Crohn's disease	Weighted median	15	-0.0795189	0.0662649	0.230134	0.923561	0.811072	1.05165	NA	NA	NA	NA
CD80 on CD62L+ plasmacytoid Dendritic Cell || id:ebi-a-GCST90002038	Crohn's disease	Inverse variance weighted	15	-0.0659623	0.0528537	0.212025	0.936166	0.84404	1.03835	22.3269	0.0721416	-0.00156848	0.963115
CD80 on CD62L+ plasmacytoid Dendritic Cell || id:ebi-a-GCST90002038	Crohn's disease	MR Egger	15	-0.0577079	0.183476	0.758113	0.943926	0.658809	1.35243	22.3231	0.0505531	NA	NA
CD80 on CD62L+ plasmacytoid Dendritic Cell || id:ebi-a-GCST90002038	Crohn's disease	Weighted median	15	-0.0805446	0.0654447	0.218425	0.922614	0.811544	1.04888	NA	NA	NA	NA
CD80 on monocyte || id:ebi-a-GCST90002039	Crohn's disease	Inverse variance weighted	17	0.0271036	0.0411105	0.509712	1.02747	0.947932	1.11369	16.5619	0.414477	-0.0142655	0.405095
CD80 on monocyte || id:ebi-a-GCST90002039	Crohn's disease	MR Egger	17	0.083432	0.0777295	0.300073	1.08701	0.933403	1.2659	15.7894	0.396186	NA	NA
CD80 on monocyte || id:ebi-a-GCST90002039	Crohn's disease	Weighted median	17	-4.08e-05	0.057757	0.999437	0.999959	0.892932	1.11981	NA	NA	NA	NA
CD80 on granulocyte || id:ebi-a-GCST90002040	Crohn's disease	Inverse variance weighted	22	-0.0339349	0.0446732	0.447479	0.966634	0.885596	1.05509	30.9935	0.0737669	-0.00802975	0.809306
CD80 on granulocyte || id:ebi-a-GCST90002040	Crohn's disease	MR Egger	22	0.0110638	0.189608	0.954048	1.01113	0.69728	1.46623	30.9011	0.0565102	NA	NA
CD80 on granulocyte || id:ebi-a-GCST90002040	Crohn's disease	Weighted median	22	-0.0356158	0.0558575	0.523722	0.965011	0.864939	1.07666	NA	NA	NA	NA
CD45 on lymphocyte || id:ebi-a-GCST90002041	Crohn's disease	Inverse variance weighted	15	-0.0281636	0.0453365	0.534461	0.972229	0.889565	1.06258	16.5978	0.278243	0.00692572	0.846021
CD45 on lymphocyte || id:ebi-a-GCST90002041	Crohn's disease	MR Egger	15	-0.0580937	0.158211	0.719384	0.943562	0.691988	1.2866	16.5479	0.220805	NA	NA
CD45 on lymphocyte || id:ebi-a-GCST90002041	Crohn's disease	Weighted median	15	-0.0346194	0.0609411	0.569981	0.965973	0.857217	1.08853	NA	NA	NA	NA
CD45 on CD33+ HLA DR+ CD14- || id:ebi-a-GCST90002042	Crohn's disease	Inverse variance weighted	15	0.0605993	0.0342569	0.0768994	1.06247	0.993477	1.13626	9.05519	0.827499	0.00605915	0.849139
CD45 on CD33+ HLA DR+ CD14- || id:ebi-a-GCST90002042	Crohn's disease	MR Egger	15	0.0342151	0.140218	0.811029	1.03481	0.786146	1.36212	9.01753	0.771618	NA	NA
CD45 on CD33+ HLA DR+ CD14- || id:ebi-a-GCST90002042	Crohn's disease	Weighted median	15	0.0579564	0.0464119	0.21176	1.05967	0.967528	1.16058	NA	NA	NA	NA
CD45 on CD33+ HLA DR+ CD14dim || id:ebi-a-GCST90002043	Crohn's disease	Inverse variance weighted	9	-0.0136175	0.0570975	0.811497	0.986475	0.882031	1.10329	12.9006	0.115316	-0.0490136	0.528033
CD45 on CD33+ HLA DR+ CD14dim || id:ebi-a-GCST90002043	Crohn's disease	MR Egger	9	0.232465	0.375383	0.555348	1.26171	0.604541	2.63324	12.1365	0.0961584	NA	NA
CD45 on CD33+ HLA DR+ CD14dim || id:ebi-a-GCST90002043	Crohn's disease	Weighted median	9	0.0256202	0.0614687	0.676824	1.02595	0.909502	1.15731	NA	NA	NA	NA
CD45 on CD33dim HLA DR+ CD11b- || id:ebi-a-GCST90002044	Crohn's disease	Inverse variance weighted	9	0.0499032	0.0490749	0.309211	1.05117	0.954771	1.1573	7.79631	0.453616	0.021238	0.784848
CD45 on CD33dim HLA DR+ CD11b- || id:ebi-a-GCST90002044	Crohn's disease	MR Egger	9	-0.0618551	0.397283	0.880668	0.940019	0.431482	2.04791	7.70769	0.359074	NA	NA
CD45 on CD33dim HLA DR+ CD11b- || id:ebi-a-GCST90002044	Crohn's disease	Weighted median	9	0.00968116	0.0660389	0.883449	1.00973	0.887138	1.14926	NA	NA	NA	NA
CD45 on CD33- HLA DR- || id:ebi-a-GCST90002045	Crohn's disease	Inverse variance weighted	10	0.0393198	0.0458237	0.390855	1.0401	0.950759	1.13784	8.16467	0.51764	0.0311068	0.47239
CD45 on CD33- HLA DR- || id:ebi-a-GCST90002045	Crohn's disease	MR Egger	10	-0.0799472	0.164659	0.640317	0.923165	0.668526	1.27479	7.59598	0.473896	NA	NA
CD45 on CD33- HLA DR- || id:ebi-a-GCST90002045	Crohn's disease	Weighted median	10	0.0463917	0.064424	0.471464	1.04748	0.923228	1.18847	NA	NA	NA	NA
CD45 on CD33- HLA DR+ || id:ebi-a-GCST90002046	Crohn's disease	Inverse variance weighted	14	-0.0142074	0.0525678	0.786953	0.985893	0.889371	1.09289	29.1458	0.00624123	0.0172411	0.745946
CD45 on CD33- HLA DR+ || id:ebi-a-GCST90002046	Crohn's disease	MR Egger	14	-0.0870574	0.226374	0.707282	0.916625	0.588164	1.42851	28.8812	0.00410316	NA	NA
CD45 on CD33- HLA DR+ || id:ebi-a-GCST90002046	Crohn's disease	Weighted median	14	-0.026196	0.0549973	0.633851	0.974144	0.874598	1.08502	NA	NA	NA	NA
CD45 on Granulocytic Myeloid-Derived Suppressor Cells || id:ebi-a-GCST90002047	Crohn's disease	Inverse variance weighted	16	-0.0313351	0.0329136	0.341076	0.969151	0.908604	1.03373	10.7044	0.773254	0.00927002	0.772938
CD45 on Granulocytic Myeloid-Derived Suppressor Cells || id:ebi-a-GCST90002047	Crohn's disease	MR Egger	16	-0.0649497	0.118912	0.593526	0.937115	0.742289	1.18308	10.6179	0.715761	NA	NA
CD45 on Granulocytic Myeloid-Derived Suppressor Cells || id:ebi-a-GCST90002047	Crohn's disease	Weighted median	16	-0.00695724	0.0459694	0.879703	0.993067	0.907504	1.0867	NA	NA	NA	NA
CD45 on CD66b++ myelod cell || id:ebi-a-GCST90002048	Crohn's disease	Inverse variance weighted	12	-0.103939	0.0511486	0.0421444	0.901281	0.815308	0.996319	11.3	0.418483	0.0369586	0.393894
CD45 on CD66b++ myelod cell || id:ebi-a-GCST90002048	Crohn's disease	MR Egger	12	-0.255535	0.177816	0.181239	0.774502	0.546591	1.09744	10.469	0.400353	NA	NA
CD45 on CD66b++ myelod cell || id:ebi-a-GCST90002048	Crohn's disease	Weighted median	12	-0.0589405	0.0710636	0.406875	0.942763	0.820185	1.08366	NA	NA	NA	NA
CD45 on Monocytic Myeloid-Derived Suppressor Cells || id:ebi-a-GCST90002049	Crohn's disease	Inverse variance weighted	8	0.115312	0.056127	0.0399293	1.12222	1.00532	1.25272	10.0478	0.185879	0.0373349	0.617022
CD45 on Monocytic Myeloid-Derived Suppressor Cells || id:ebi-a-GCST90002049	Crohn's disease	MR Egger	8	-0.0324433	0.286503	0.913535	0.968077	0.55212	1.69741	9.60312	0.142391	NA	NA
CD45 on Monocytic Myeloid-Derived Suppressor Cells || id:ebi-a-GCST90002049	Crohn's disease	Weighted median	8	0.0531289	0.0714228	0.456958	1.05457	0.916806	1.21303	NA	NA	NA	NA
CD45 on CD33dim HLA DR- || id:ebi-a-GCST90002050	Crohn's disease	Inverse variance weighted	12	-0.0706868	0.0444502	0.111779	0.931754	0.854013	1.01657	6.37769	0.847013	-0.0448137	0.372879
CD45 on CD33dim HLA DR- || id:ebi-a-GCST90002050	Crohn's disease	MR Egger	12	0.10912	0.197812	0.593309	1.1153	0.756849	1.64351	5.50751	0.854806	NA	NA
CD45 on CD33dim HLA DR- || id:ebi-a-GCST90002050	Crohn's disease	Weighted median	12	-0.0556587	0.059864	0.352499	0.945862	0.841144	1.06362	NA	NA	NA	NA
CD45 on basophil || id:ebi-a-GCST90002051	Crohn's disease	Inverse variance weighted	14	-0.0702825	0.0349516	0.0443408	0.93213	0.870413	0.998224	4.32968	0.987152	0.0122053	0.679621
CD45 on basophil || id:ebi-a-GCST90002051	Crohn's disease	MR Egger	14	-0.114909	0.111086	0.32134	0.891448	0.717031	1.10829	4.15056	0.980564	NA	NA
CD45 on basophil || id:ebi-a-GCST90002051	Crohn's disease	Weighted median	14	-0.0821995	0.0470698	0.0807535	0.921088	0.839914	1.01011	NA	NA	NA	NA
CD45 on Immature Myeloid-Derived Suppressor Cells || id:ebi-a-GCST90002052	Crohn's disease	Inverse variance weighted	6	0.09862	0.0410318	0.0162388	1.10365	1.01836	1.19607	6.51761	0.259057	0.0478862	0.159822
CD45 on Immature Myeloid-Derived Suppressor Cells || id:ebi-a-GCST90002052	Crohn's disease	MR Egger	6	-0.0231606	0.0792594	0.784653	0.977106	0.836516	1.14132	3.54584	0.470942	NA	NA
CD45 on Immature Myeloid-Derived Suppressor Cells || id:ebi-a-GCST90002052	Crohn's disease	Weighted median	6	0.0688908	0.0404164	0.0882833	1.07132	0.989728	1.15964	NA	NA	NA	NA
CD45 on CD33+ HLA DR+ || id:ebi-a-GCST90002053	Crohn's disease	Inverse variance weighted	11	-0.0684962	0.0417852	0.101162	0.933797	0.860368	1.01349	7.30475	0.696395	-0.0133221	0.710332
CD45 on CD33+ HLA DR+ || id:ebi-a-GCST90002053	Crohn's disease	MR Egger	11	-0.0120483	0.15305	0.938977	0.988024	0.731963	1.33366	7.15777	0.620698	NA	NA
CD45 on CD33+ HLA DR+ || id:ebi-a-GCST90002053	Crohn's disease	Weighted median	11	-0.0941438	0.057919	0.104069	0.910152	0.812479	1.01957	NA	NA	NA	NA
CD8 on Central Memory CD8+ T cell || id:ebi-a-GCST90002054	Crohn's disease	Inverse variance weighted	12	0.0324039	0.0499602	0.5166	1.03293	0.936582	1.1392	14.0535	0.230047	-0.0182053	0.55193
CD8 on Central Memory CD8+ T cell || id:ebi-a-GCST90002054	Crohn's disease	MR Egger	12	0.106139	0.130359	0.434488	1.11198	0.861255	1.43569	13.5404	0.195005	NA	NA
CD8 on Central Memory CD8+ T cell || id:ebi-a-GCST90002054	Crohn's disease	Weighted median	12	0.079906	0.0613091	0.192462	1.08319	0.96054	1.22149	NA	NA	NA	NA
CD8 on naive CD8+ T cell || id:ebi-a-GCST90002055	Crohn's disease	Inverse variance weighted	9	-0.0045796	0.0490228	0.925572	0.995431	0.904236	1.09582	10.3157	0.243566	-0.02818	0.262554
CD8 on naive CD8+ T cell || id:ebi-a-GCST90002055	Crohn's disease	MR Egger	9	0.0936929	0.0936592	0.350455	1.09822	0.914042	1.31952	8.51088	0.289704	NA	NA
CD8 on naive CD8+ T cell || id:ebi-a-GCST90002055	Crohn's disease	Weighted median	9	-0.000539667	0.0513344	0.991612	0.99946	0.903793	1.10525	NA	NA	NA	NA
CD8 on Effector Memory CD8+ T cell || id:ebi-a-GCST90002056	Crohn's disease	Inverse variance weighted	18	0.0348949	0.0436274	0.423804	1.03551	0.950645	1.12795	13.334	0.713553	-0.0348776	0.179742
CD8 on Effector Memory CD8+ T cell || id:ebi-a-GCST90002056	Crohn's disease	MR Egger	18	0.21759	0.137337	0.132677	1.24308	0.949718	1.62705	11.3658	0.786363	NA	NA
CD8 on Effector Memory CD8+ T cell || id:ebi-a-GCST90002056	Crohn's disease	Weighted median	18	0.0928634	0.0586234	0.113179	1.09731	0.978203	1.23092	NA	NA	NA	NA
CD8 on Terminally Differentiated CD8+ T cell || id:ebi-a-GCST90002057	Crohn's disease	Inverse variance weighted	11	-0.0867035	0.106881	0.417242	0.916949	0.743646	1.13064	31.5171	0.000481755	-0.0916722	0.22615
CD8 on Terminally Differentiated CD8+ T cell || id:ebi-a-GCST90002057	Crohn's disease	MR Egger	11	0.480962	0.44898	0.311949	1.61763	0.670965	3.89994	26.5393	0.00166632	NA	NA
CD8 on Terminally Differentiated CD8+ T cell || id:ebi-a-GCST90002057	Crohn's disease	Weighted median	11	-0.0356403	0.0826373	0.666261	0.964987	0.82069	1.13466	NA	NA	NA	NA
CD8 on CD8+ T cell || id:ebi-a-GCST90002058	Crohn's disease	Inverse variance weighted	18	0.0151998	0.0373809	0.684288	1.01532	0.943587	1.0925	17.4234	0.426054	0.00158577	0.928366
[truncated: 185 more rows]
